# Supplementary material for: Identification of key genes and pathways in endometriosis by integrated expression profiles analysis
Source: PeerJ journal article supplement (doi:10.7717/peerj.10171), 2020-12-07

# PCA

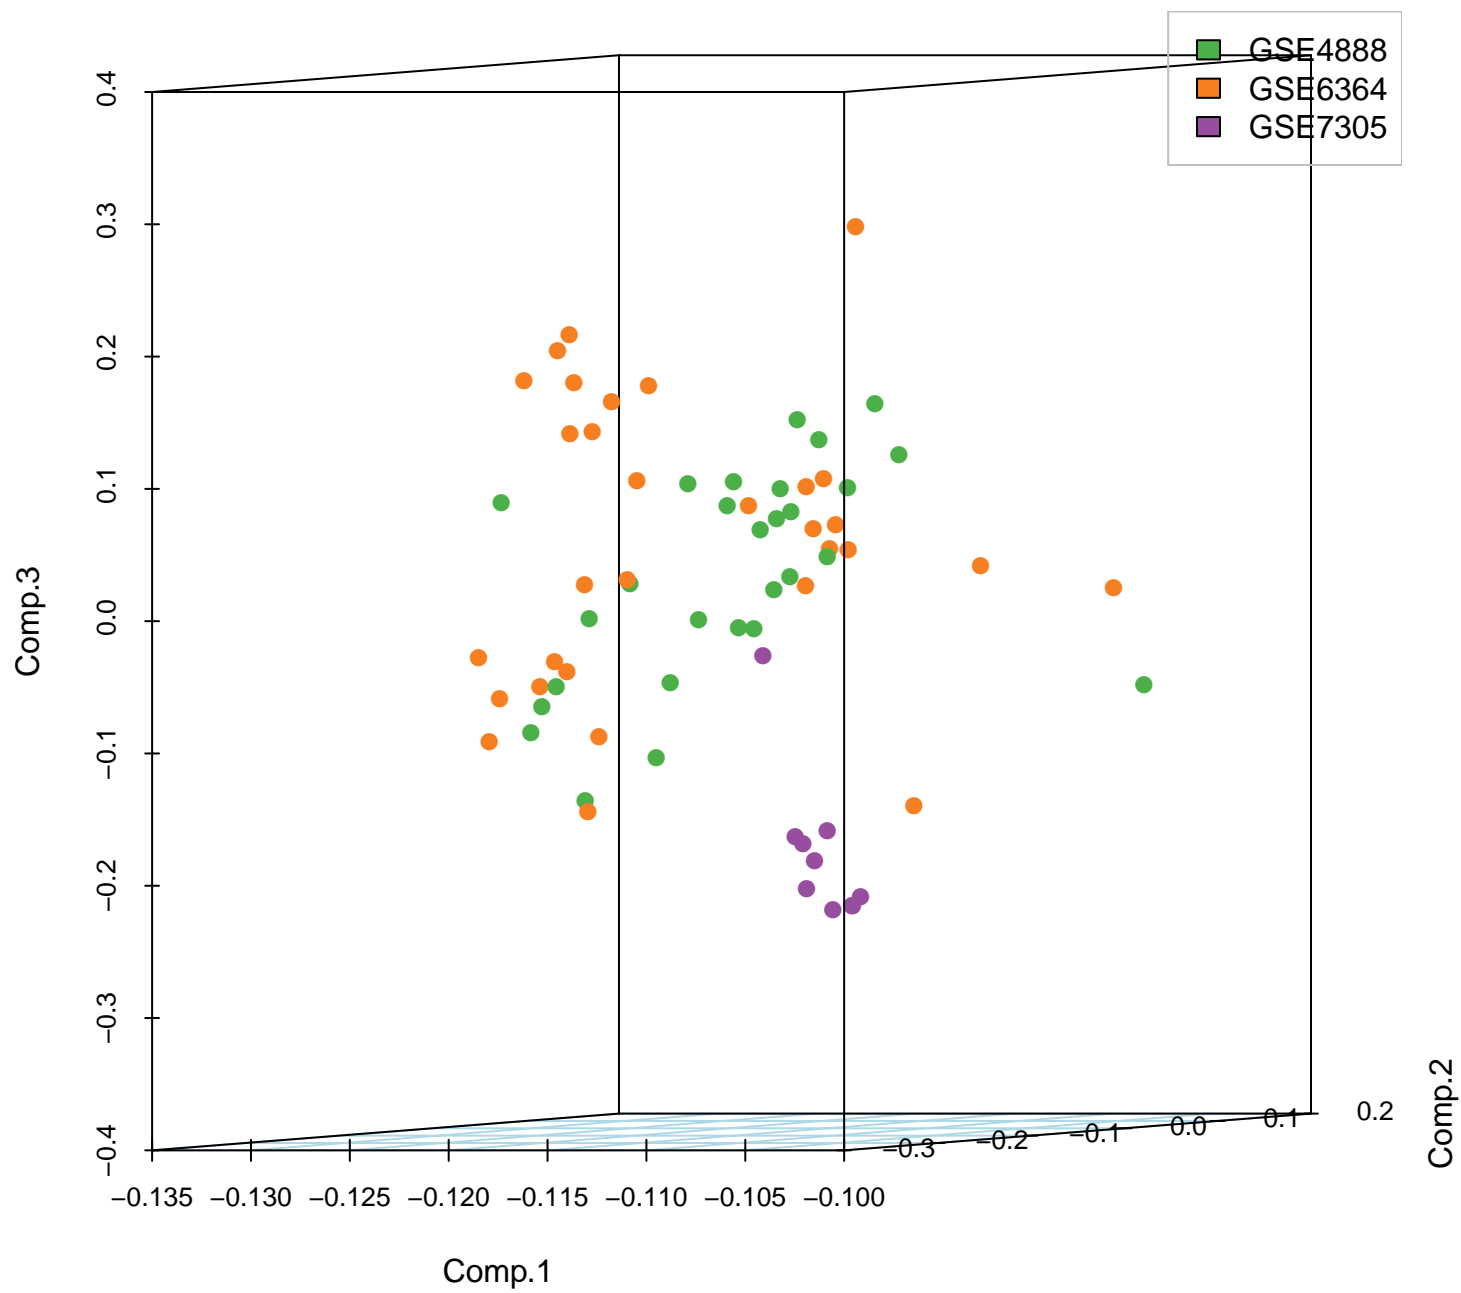

# PCA

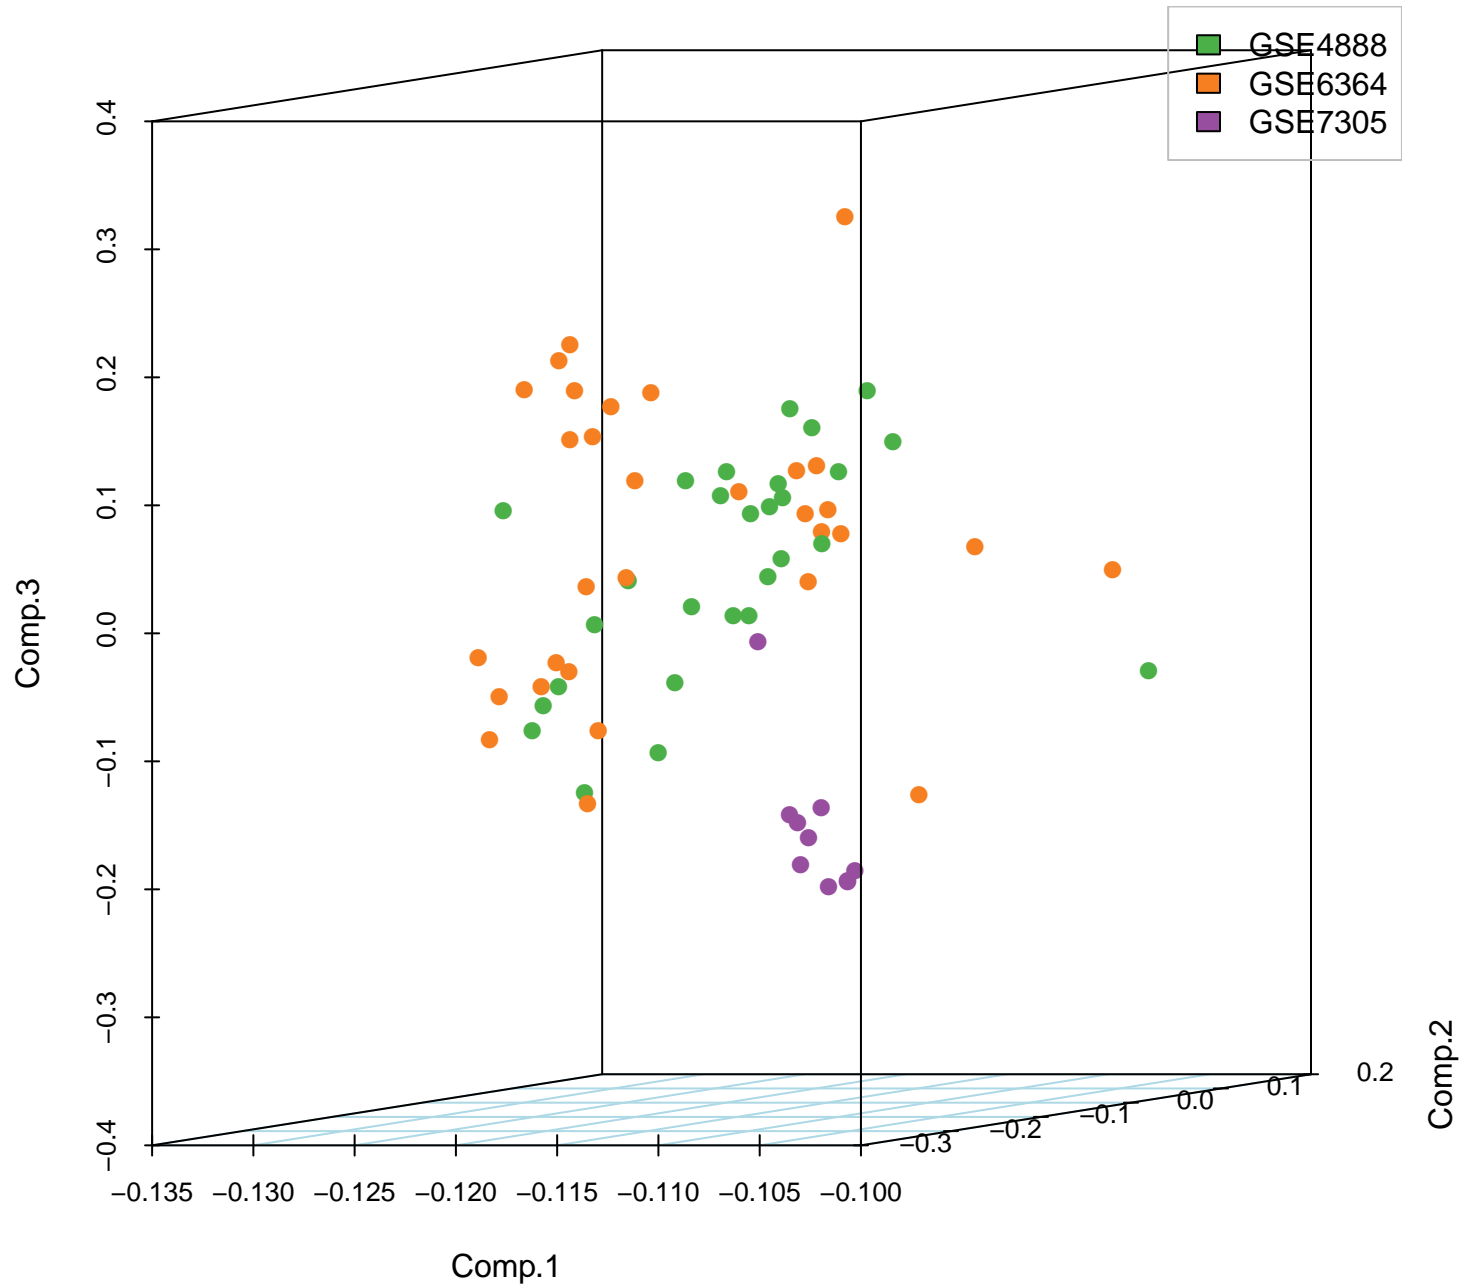



# PCA

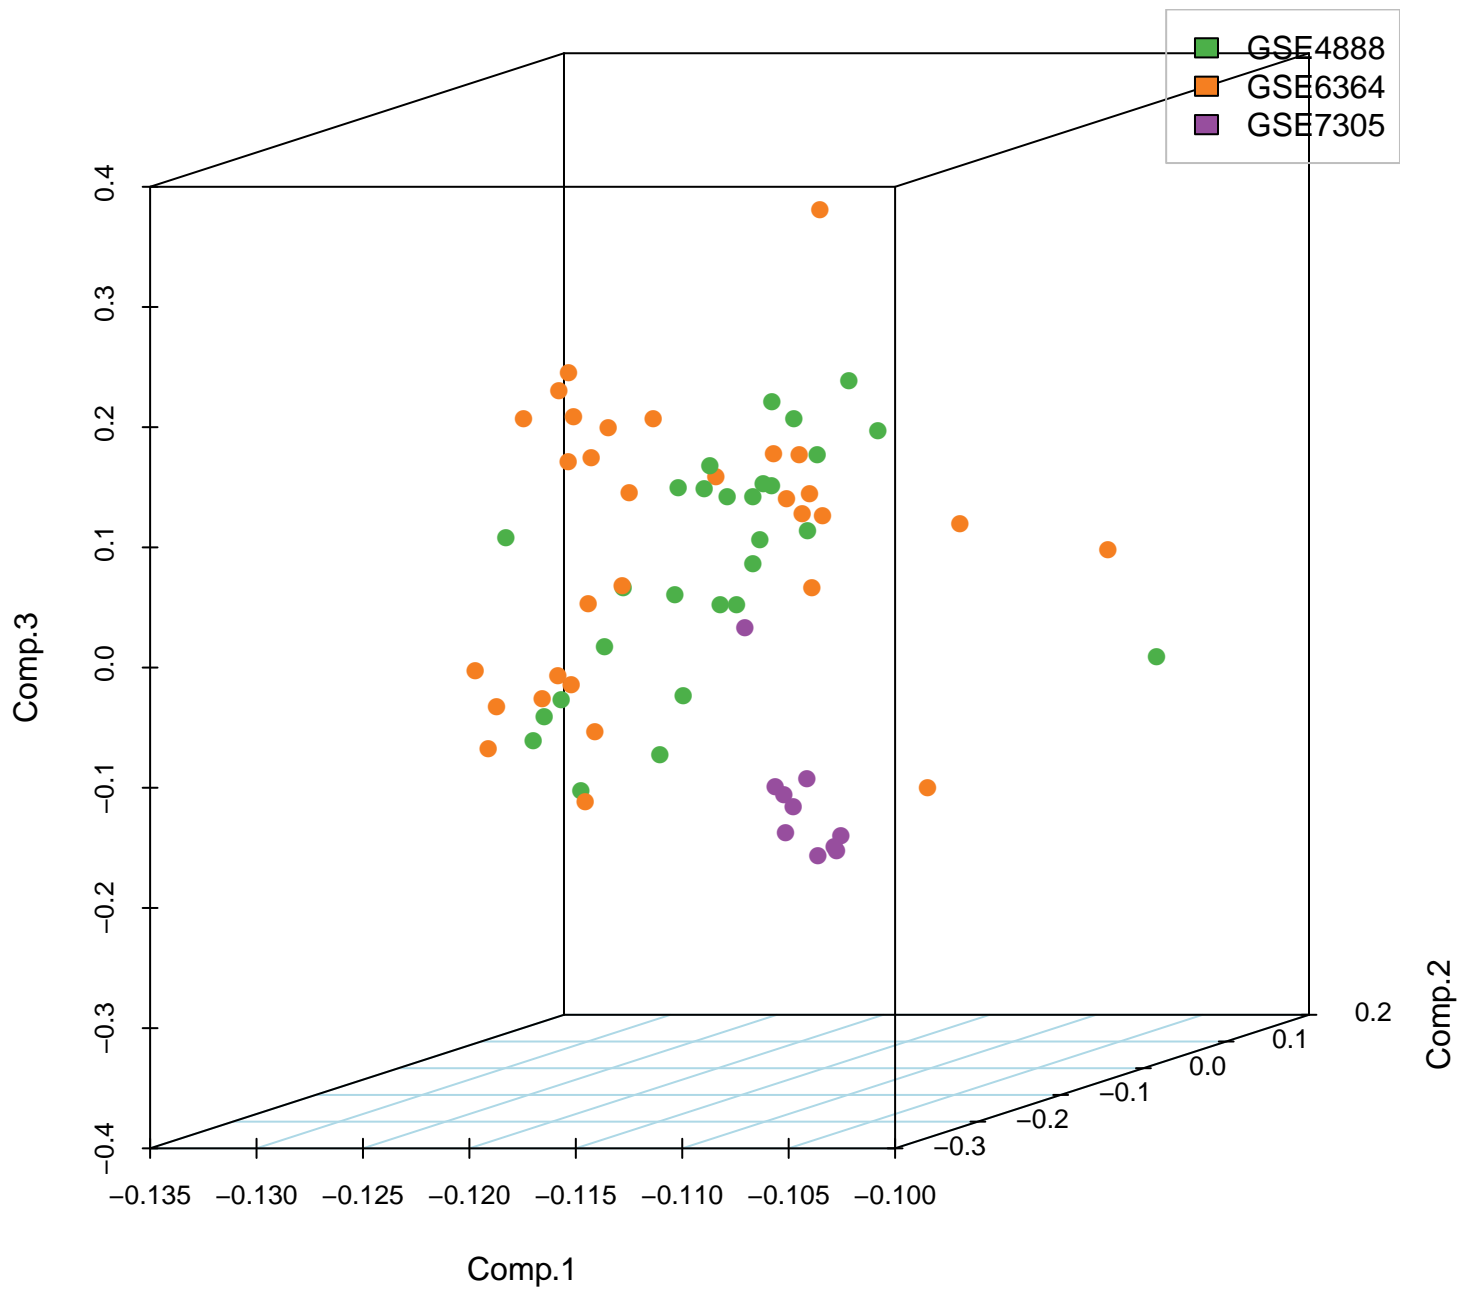

# PCA

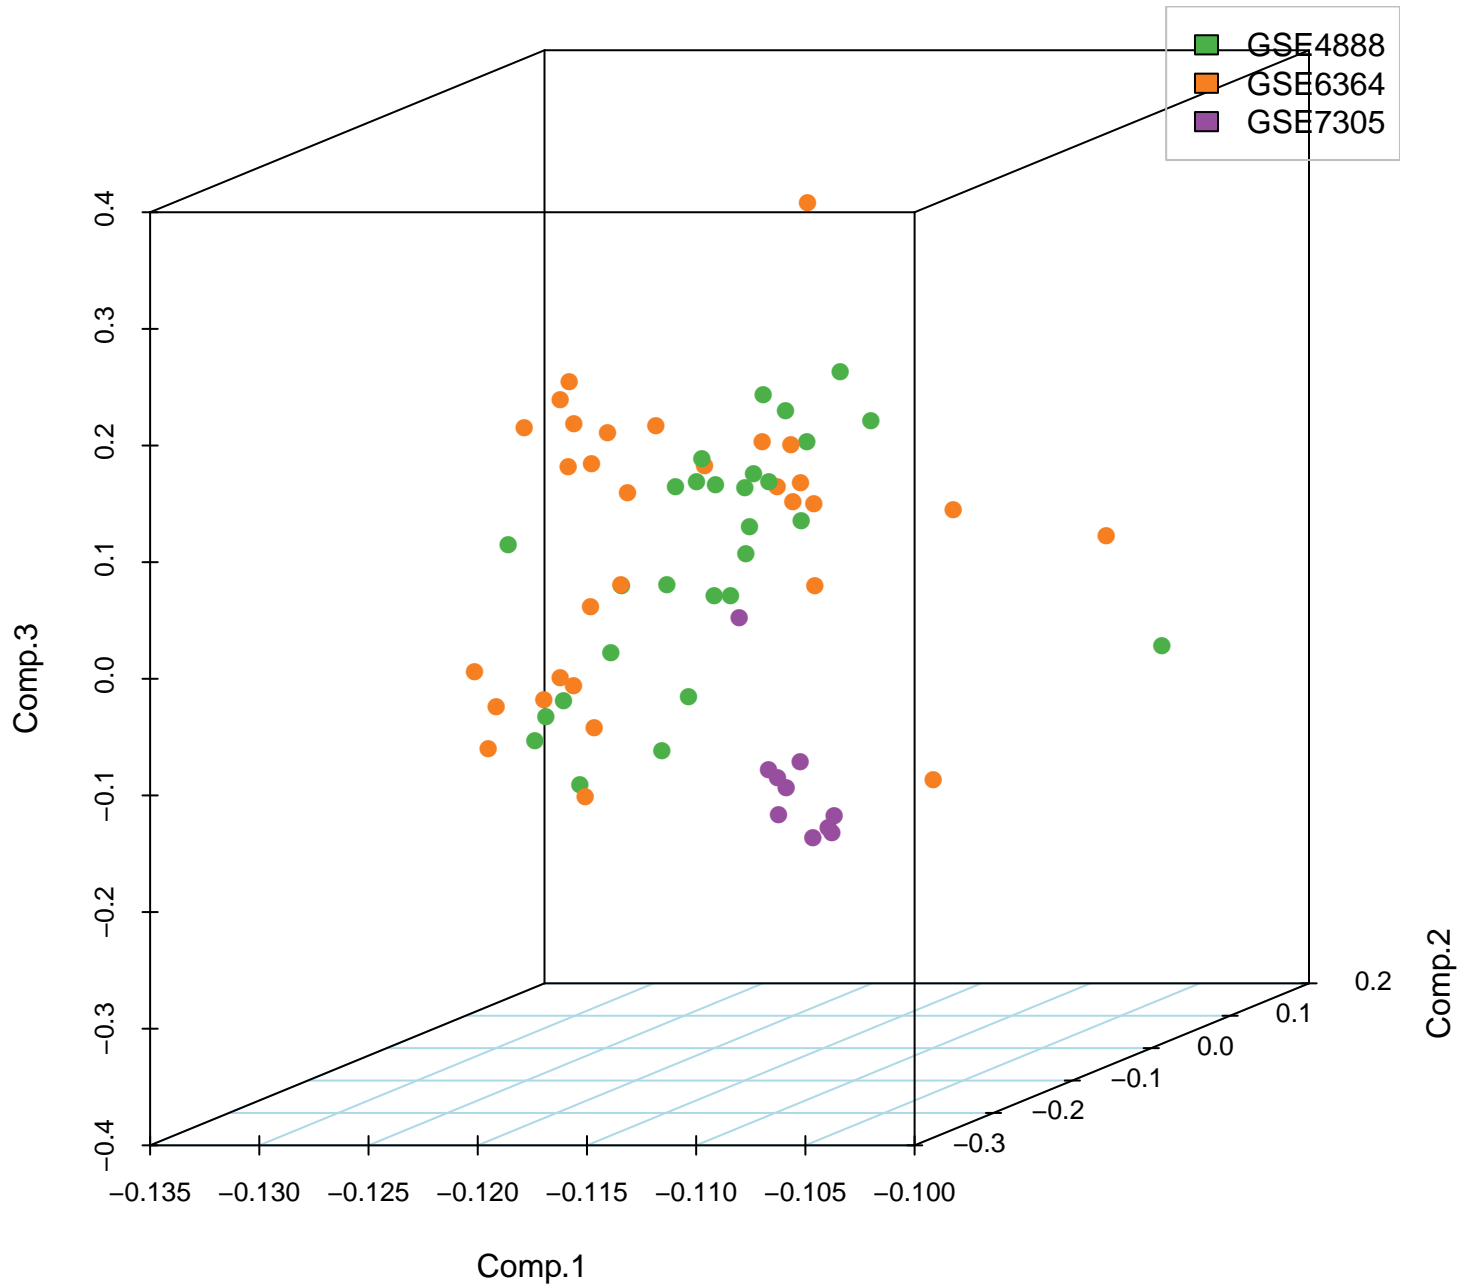

# PCA

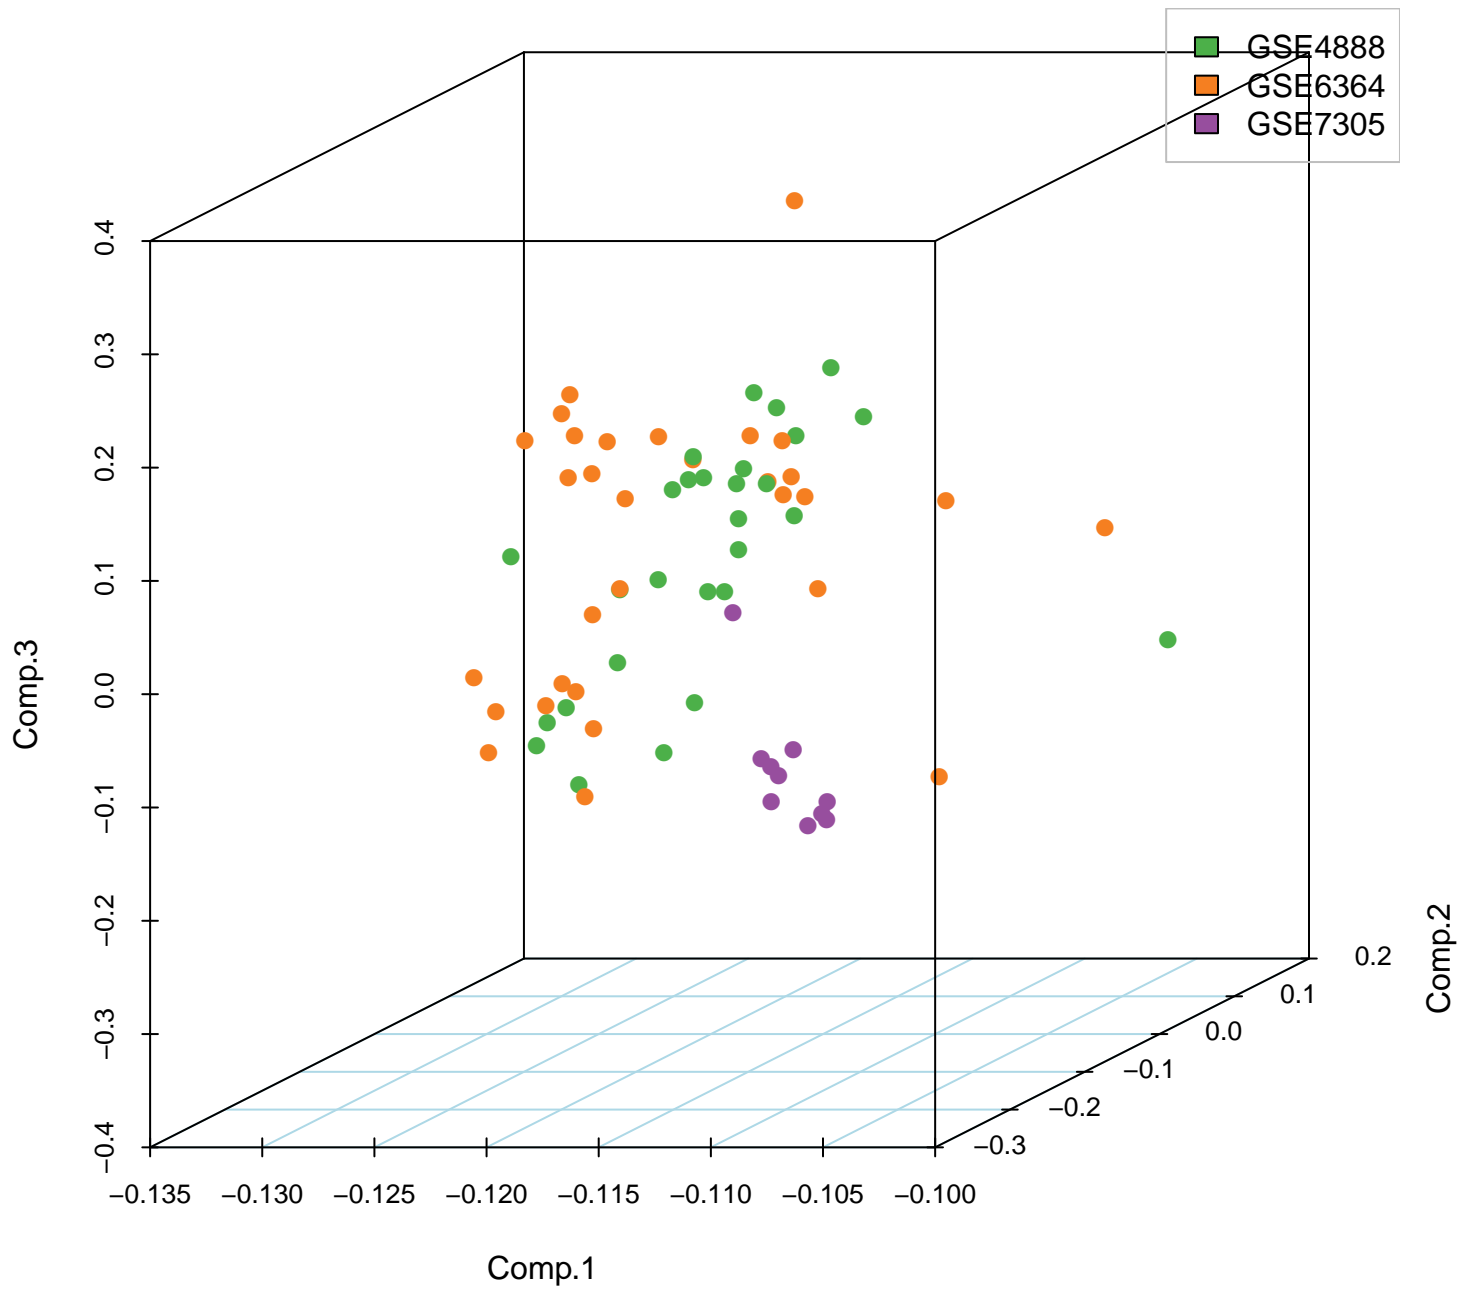





# PCA

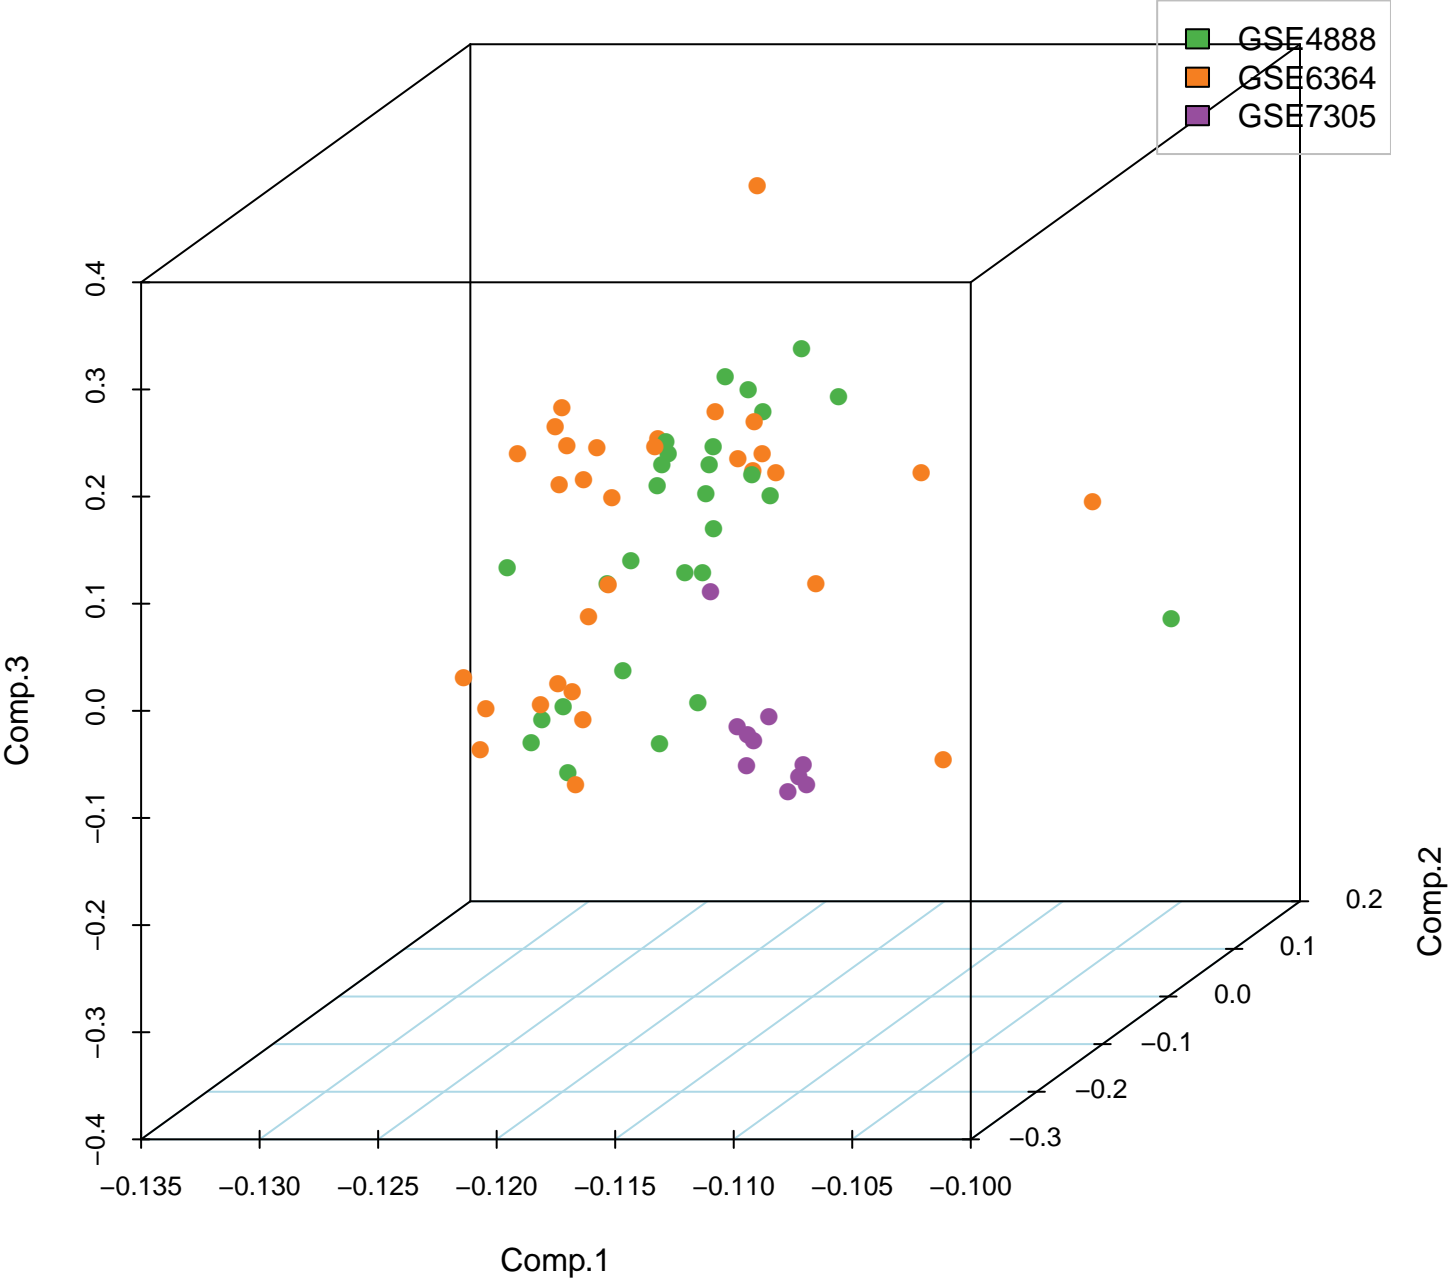

# PCA

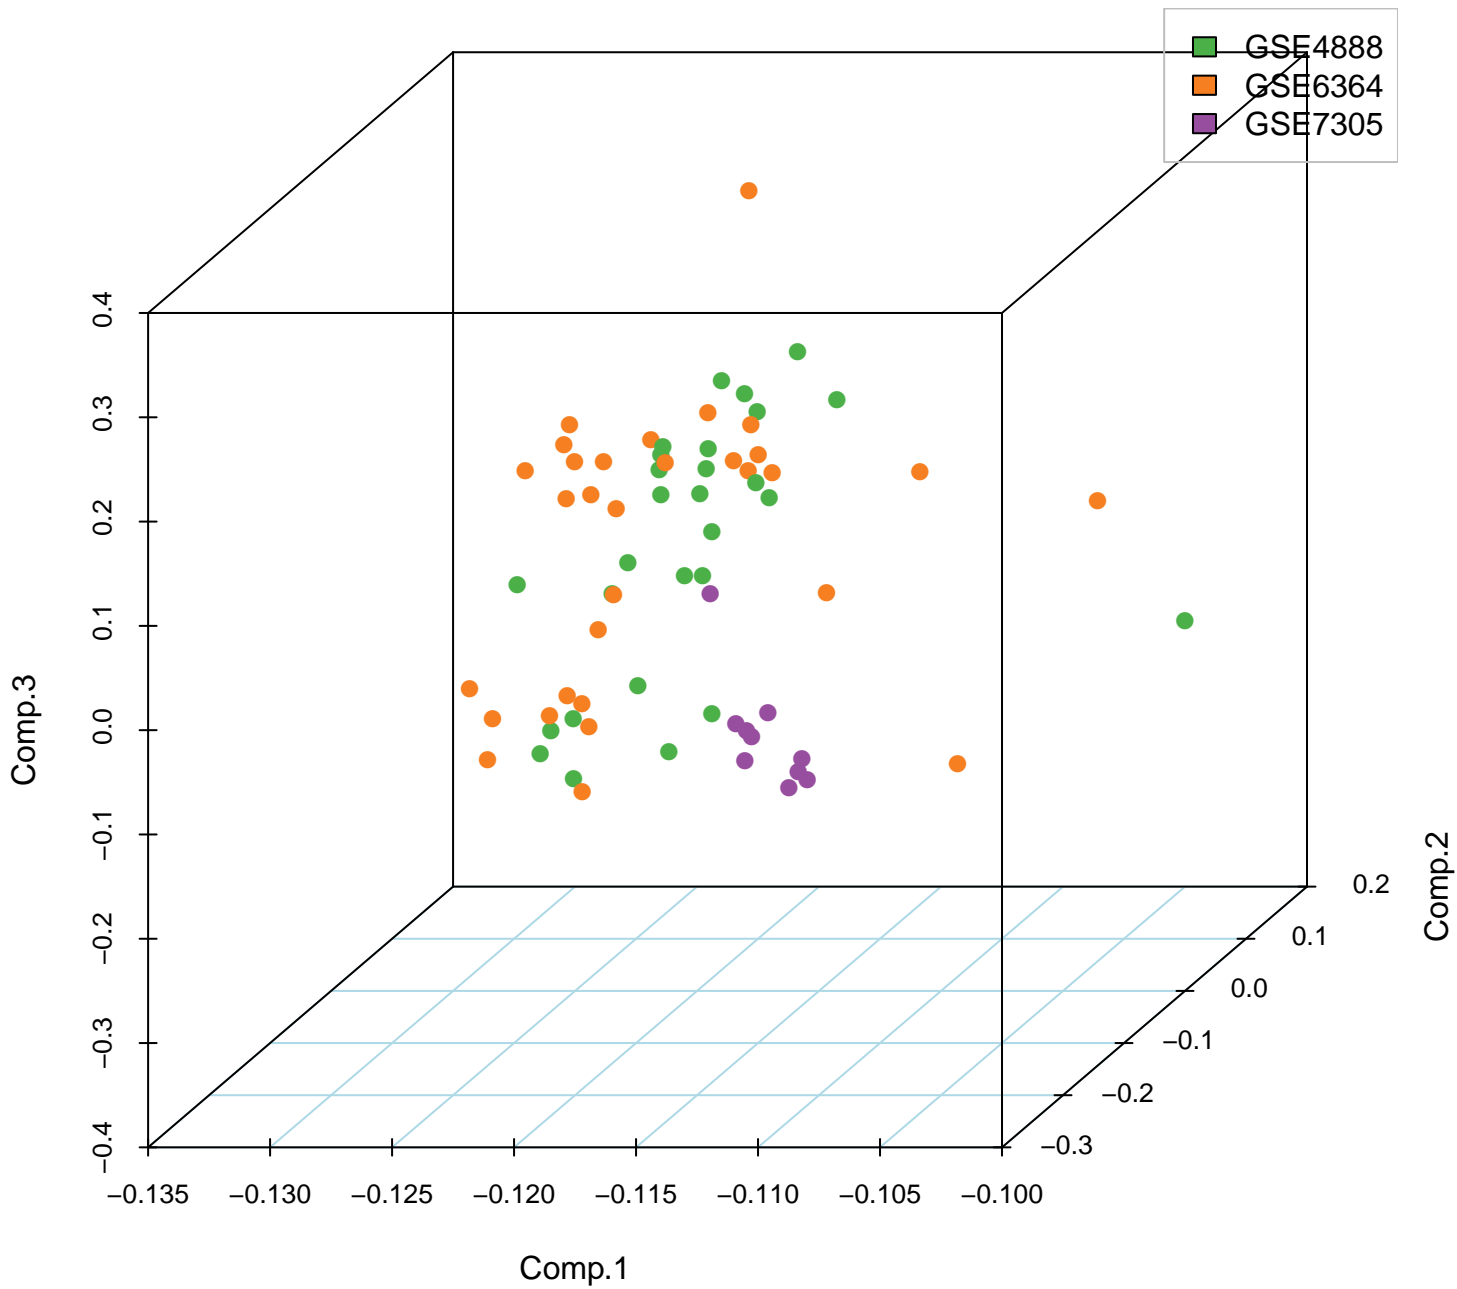

# PCA

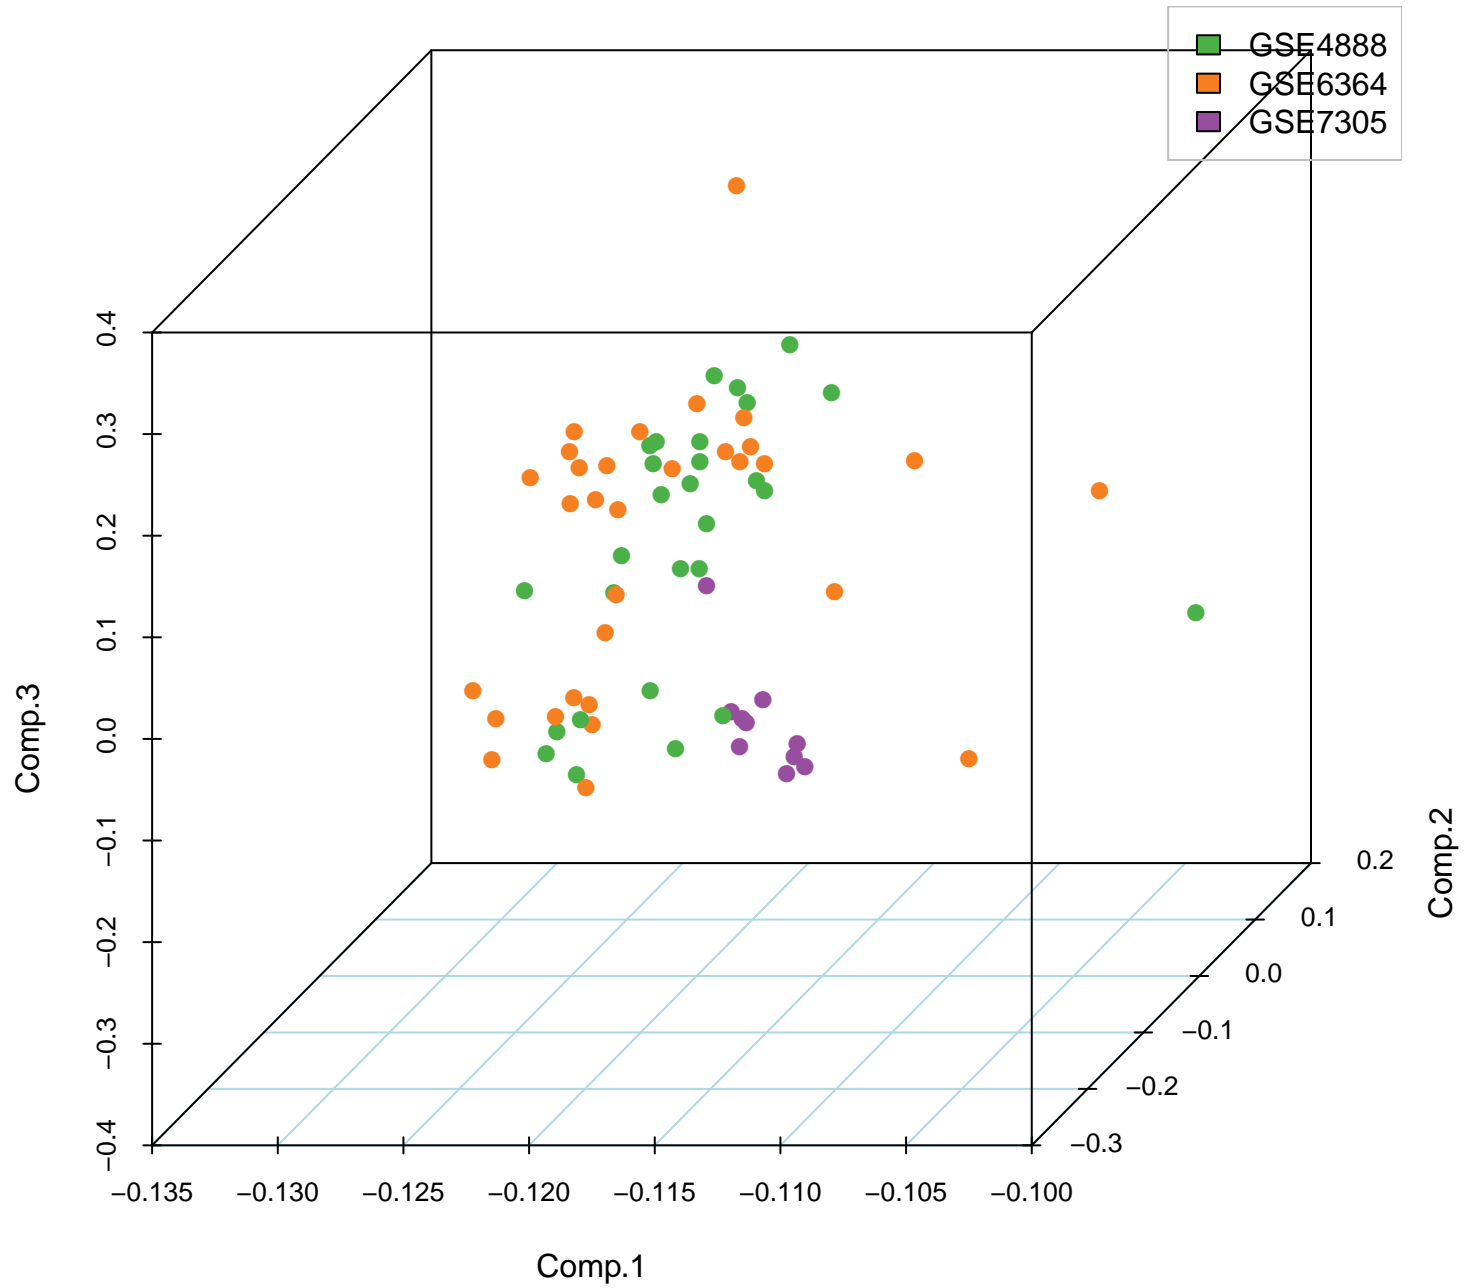





# PCA

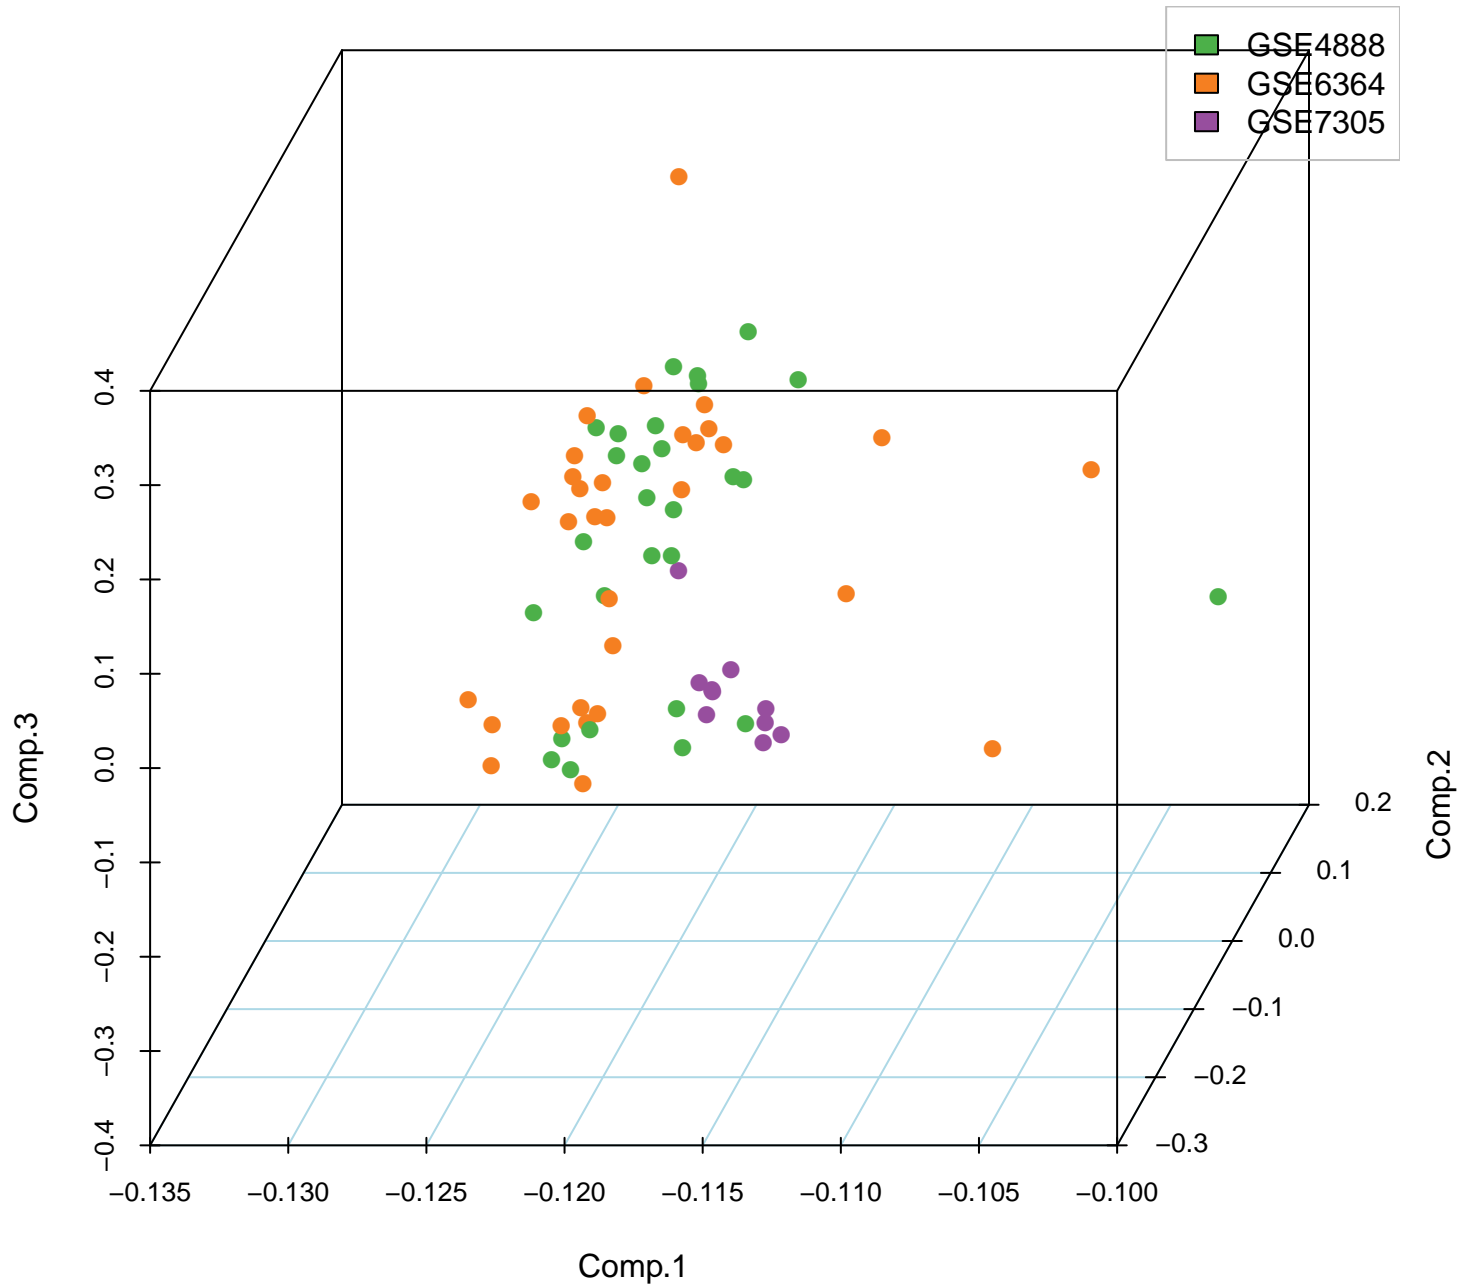

# PCA

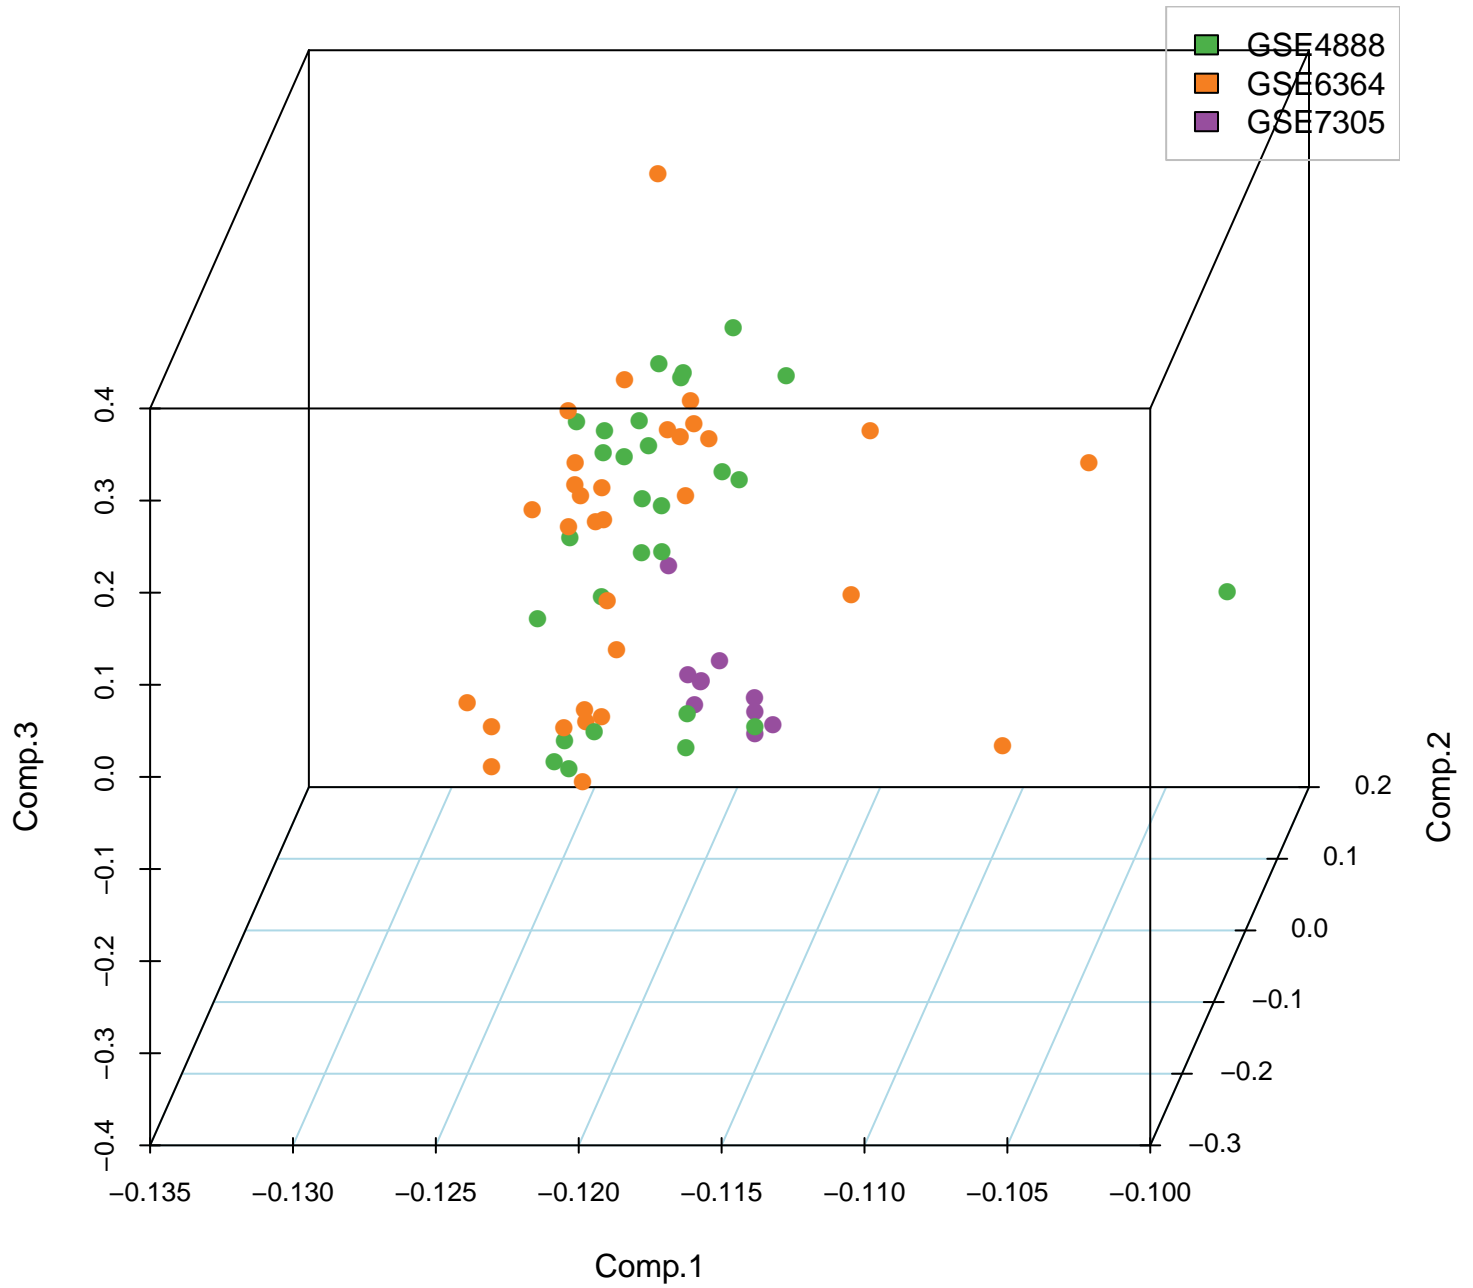

# PCA

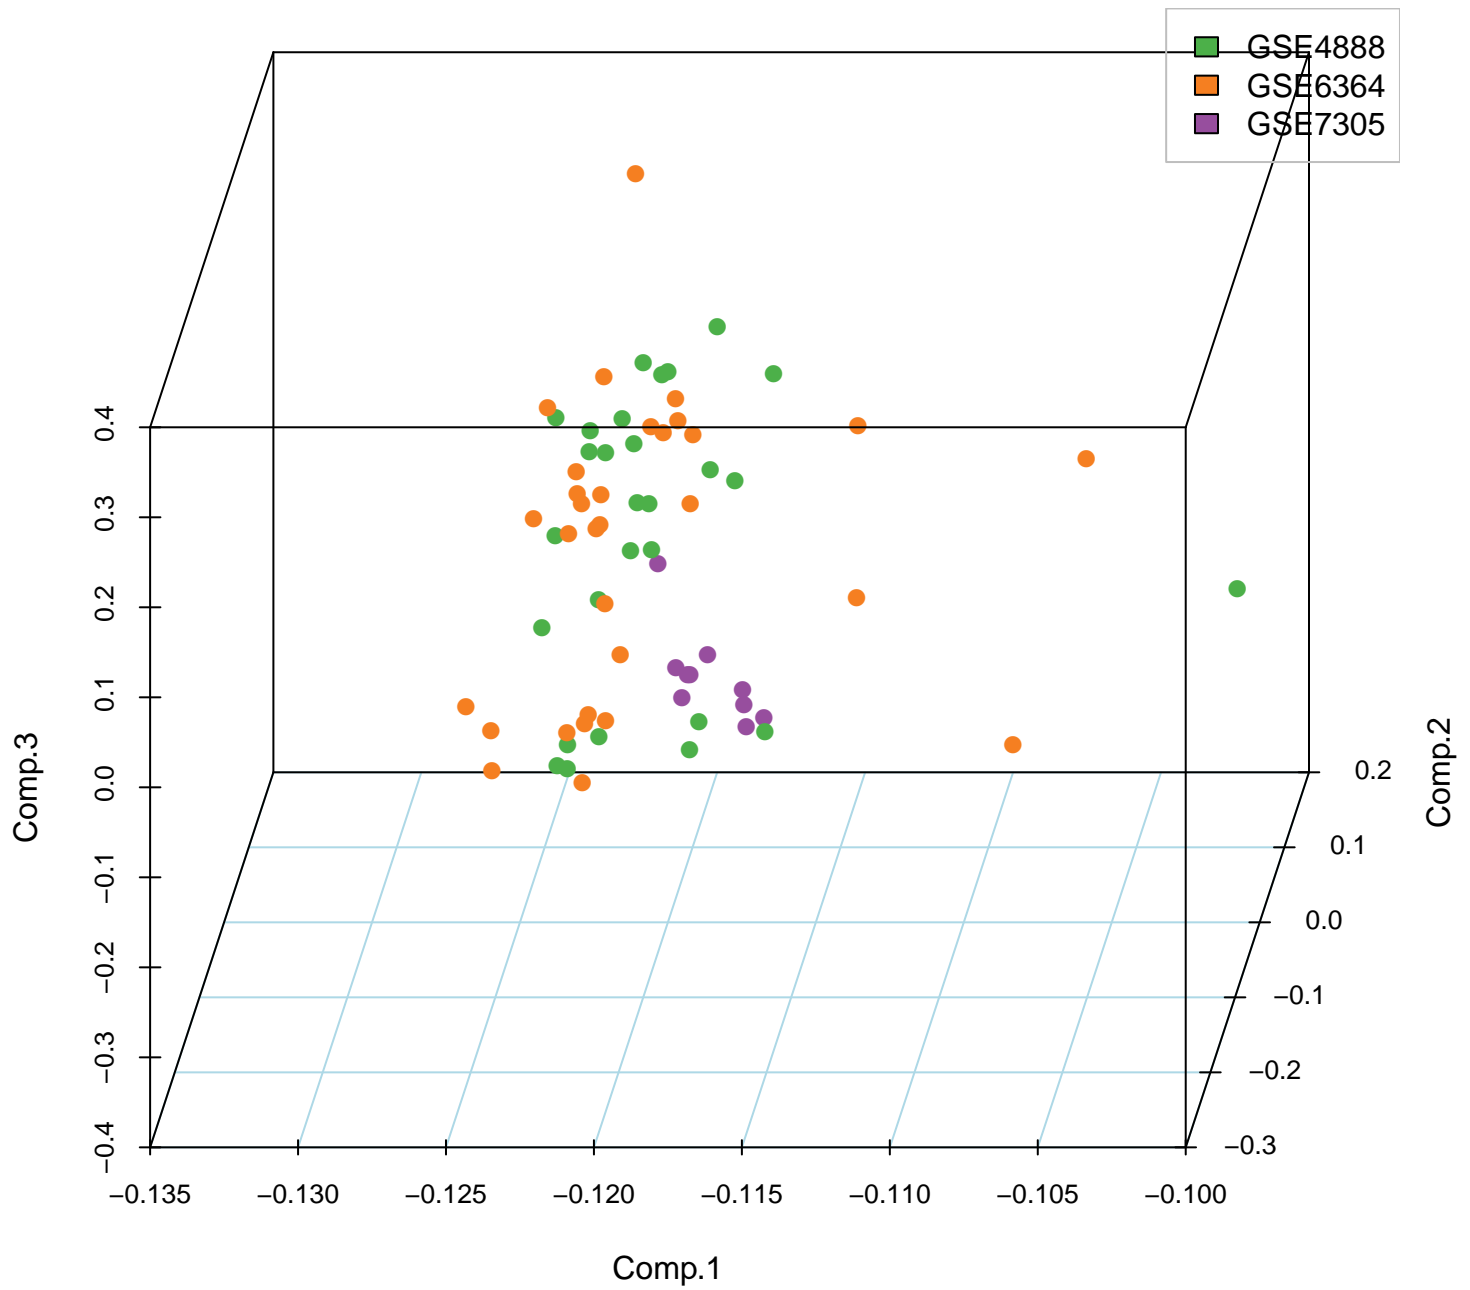



# PCA

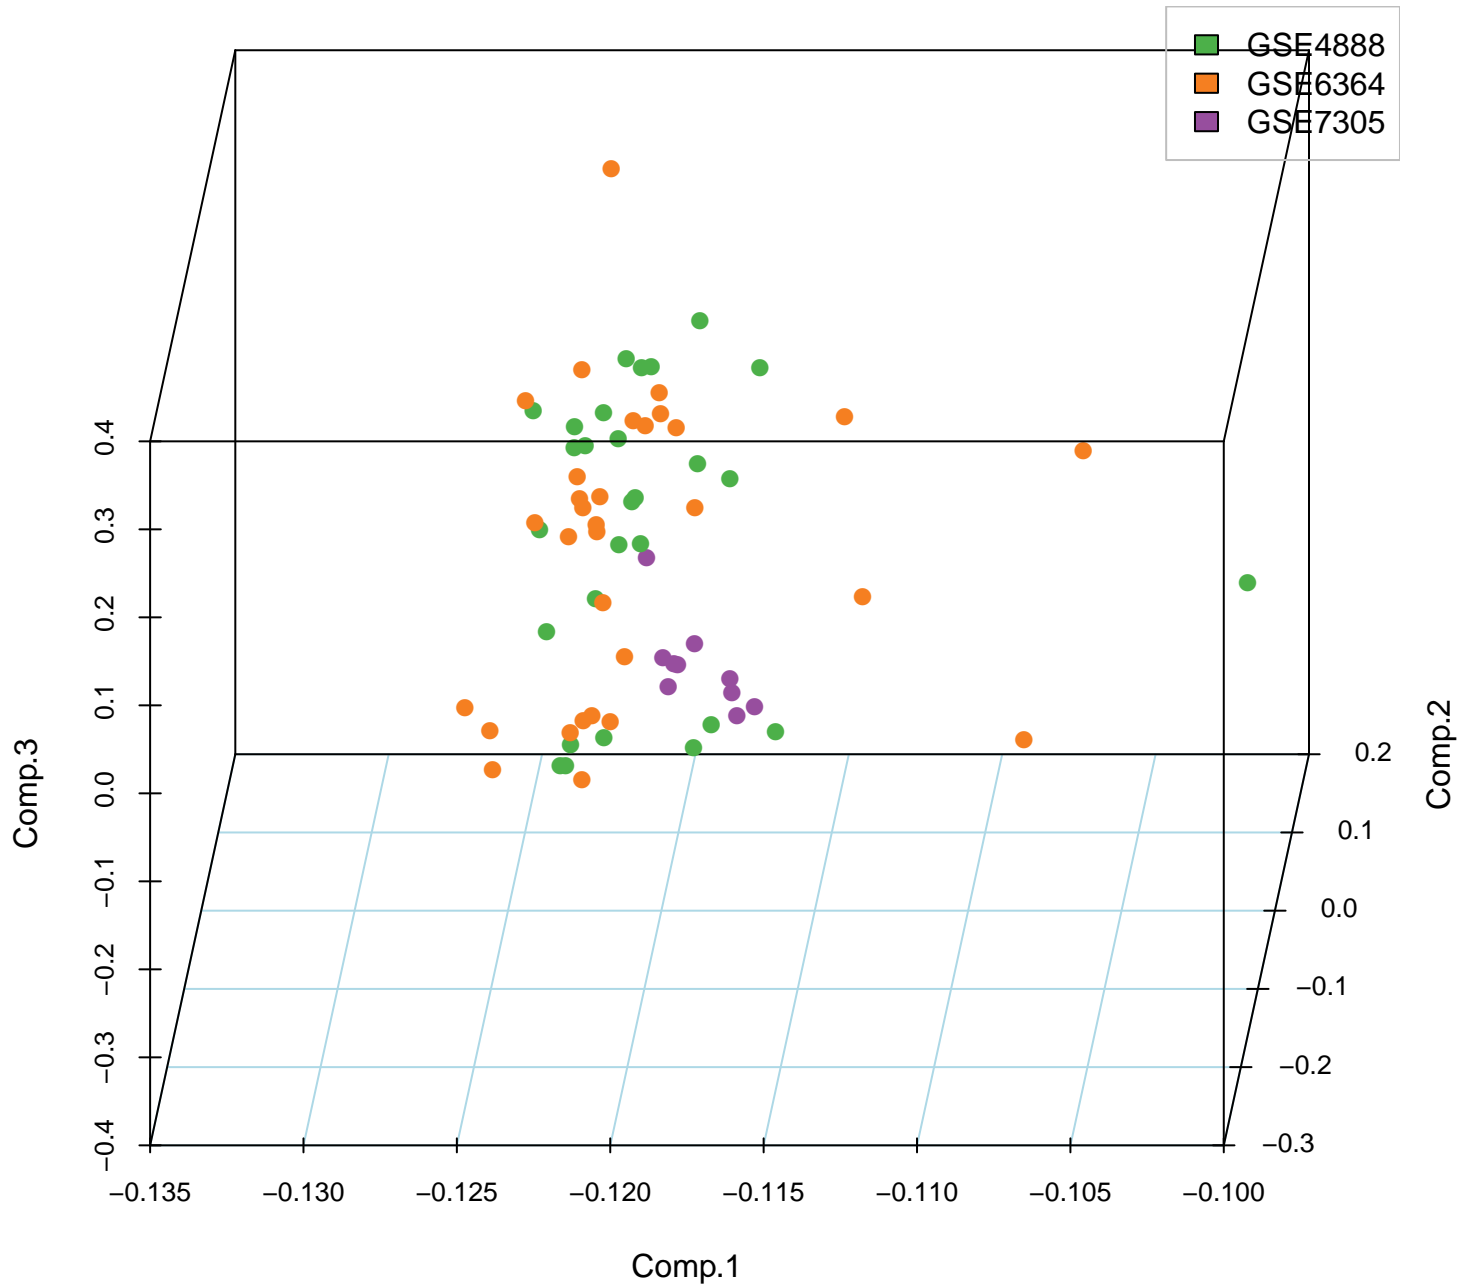

# PCA

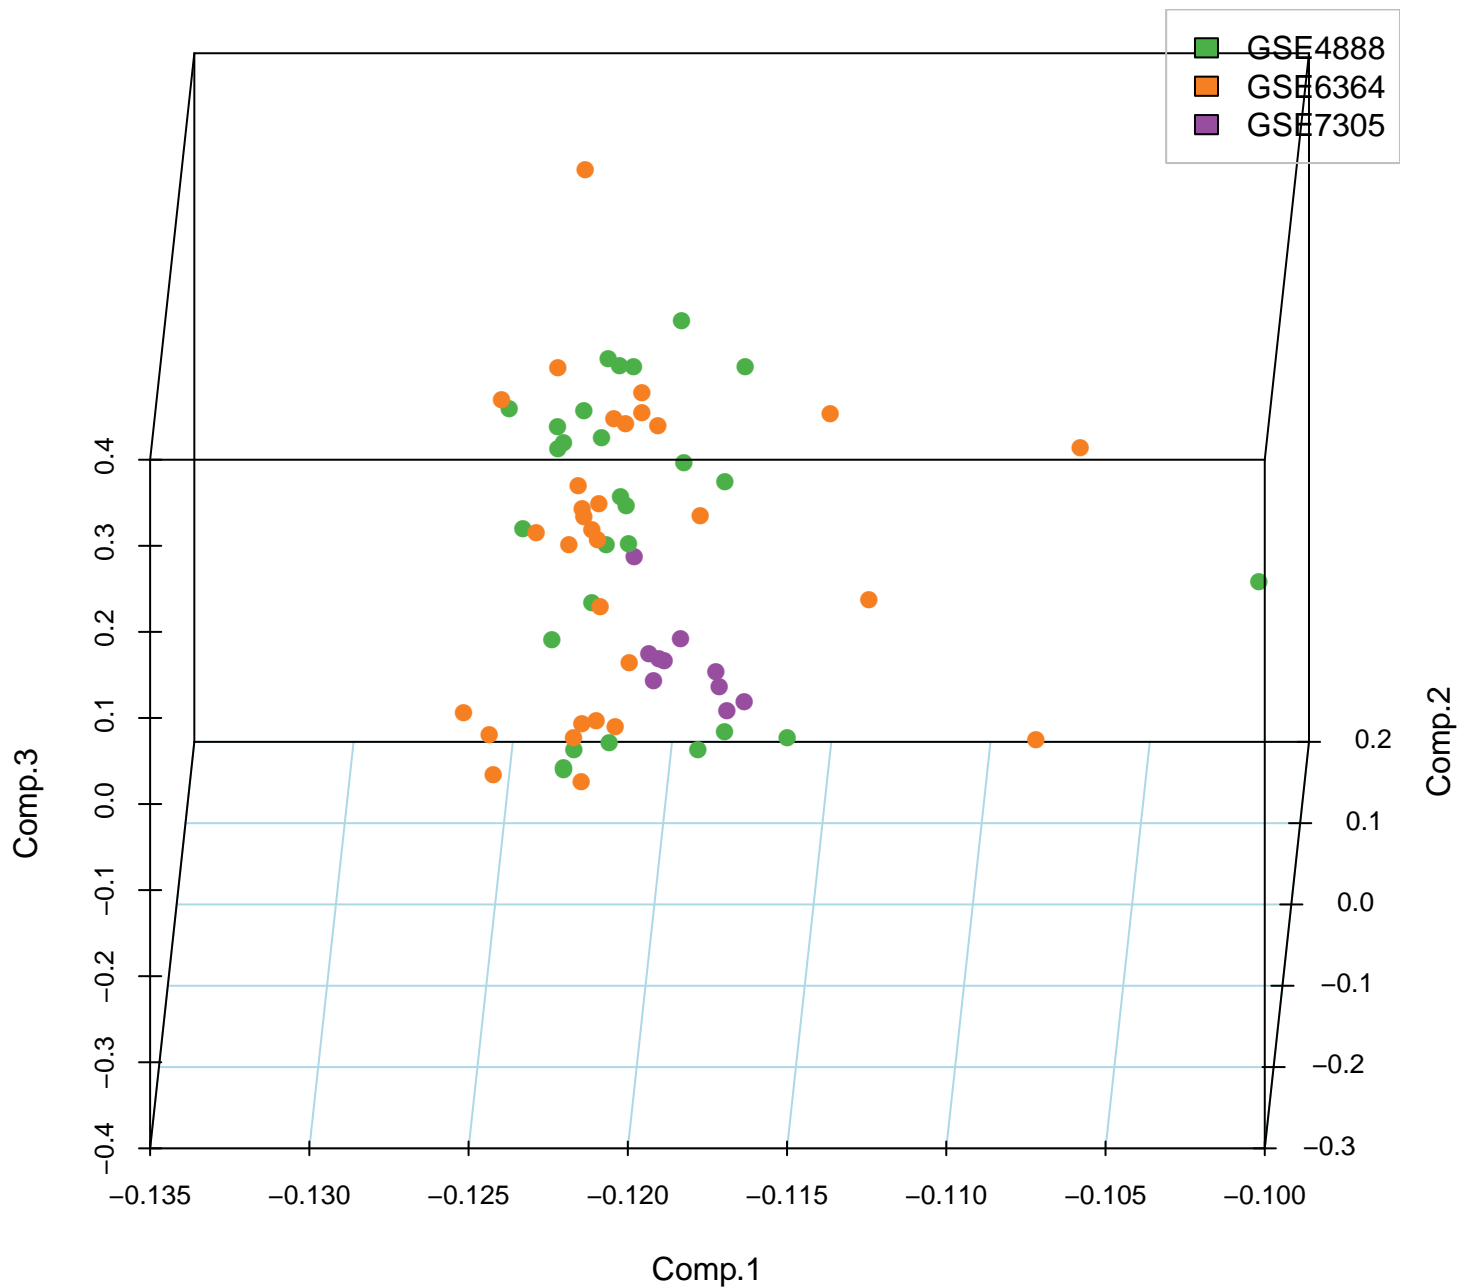

# PCA

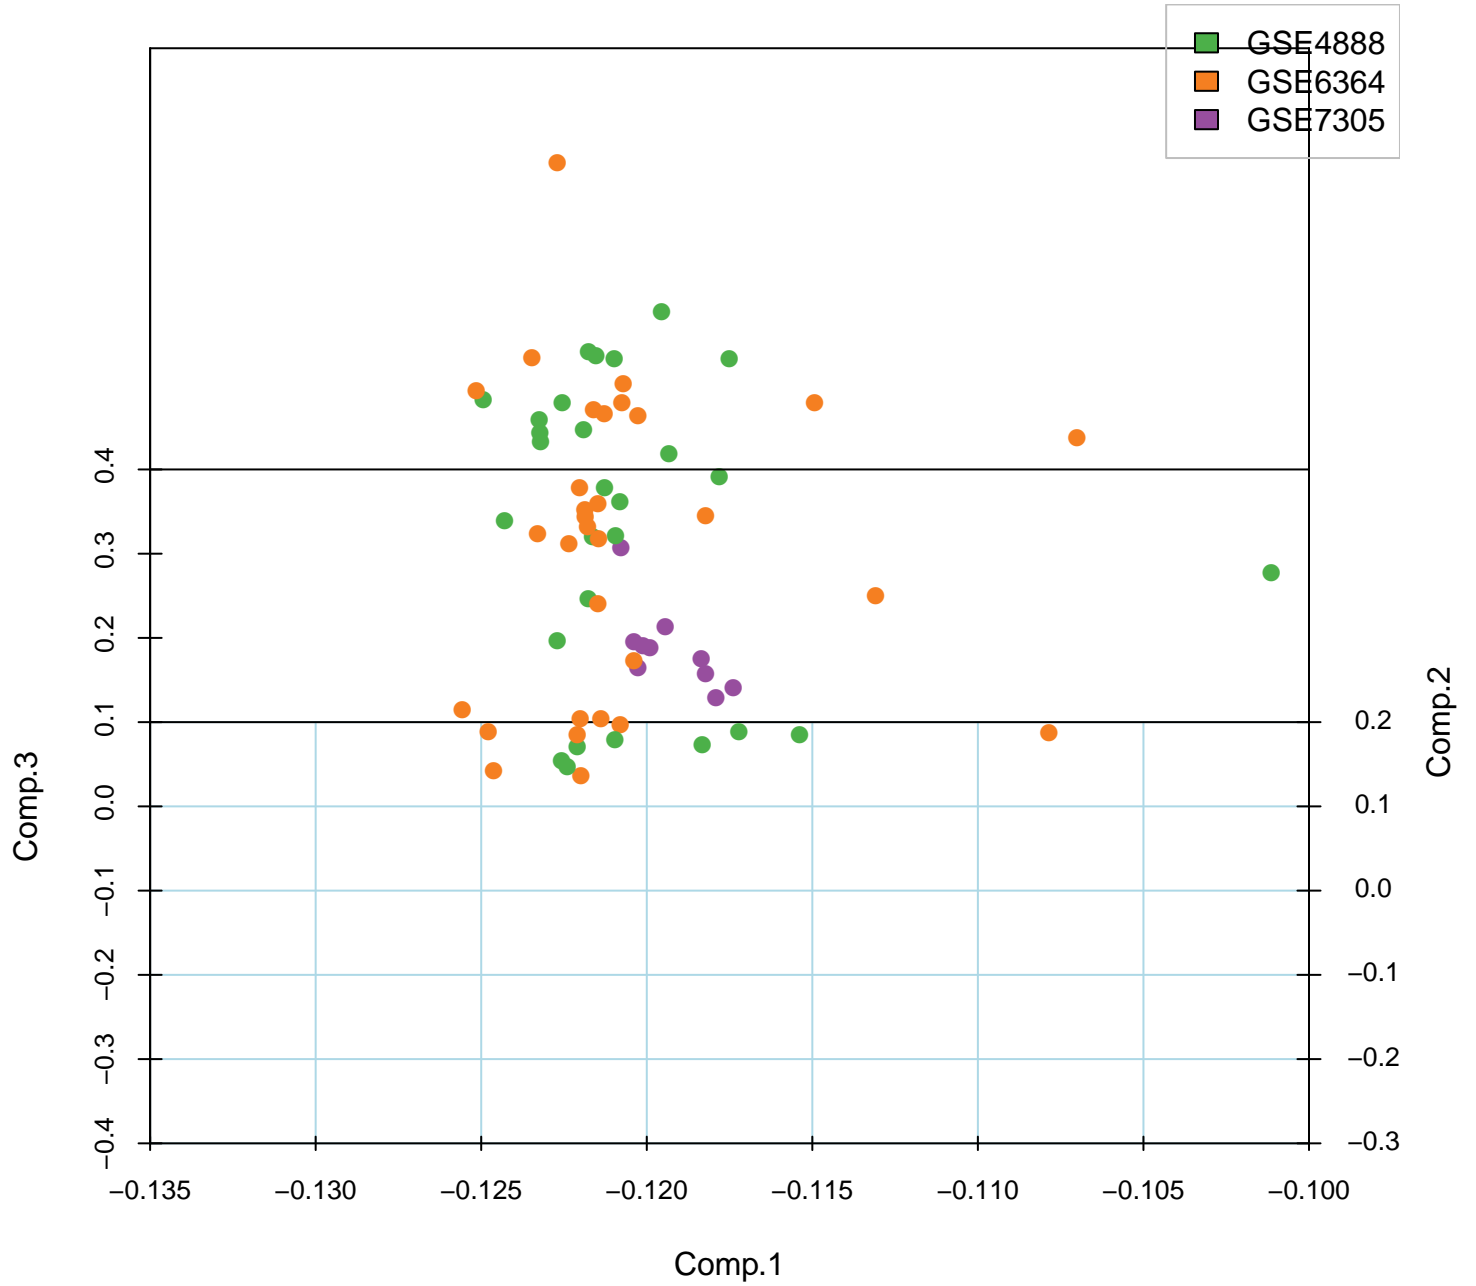

# PCA

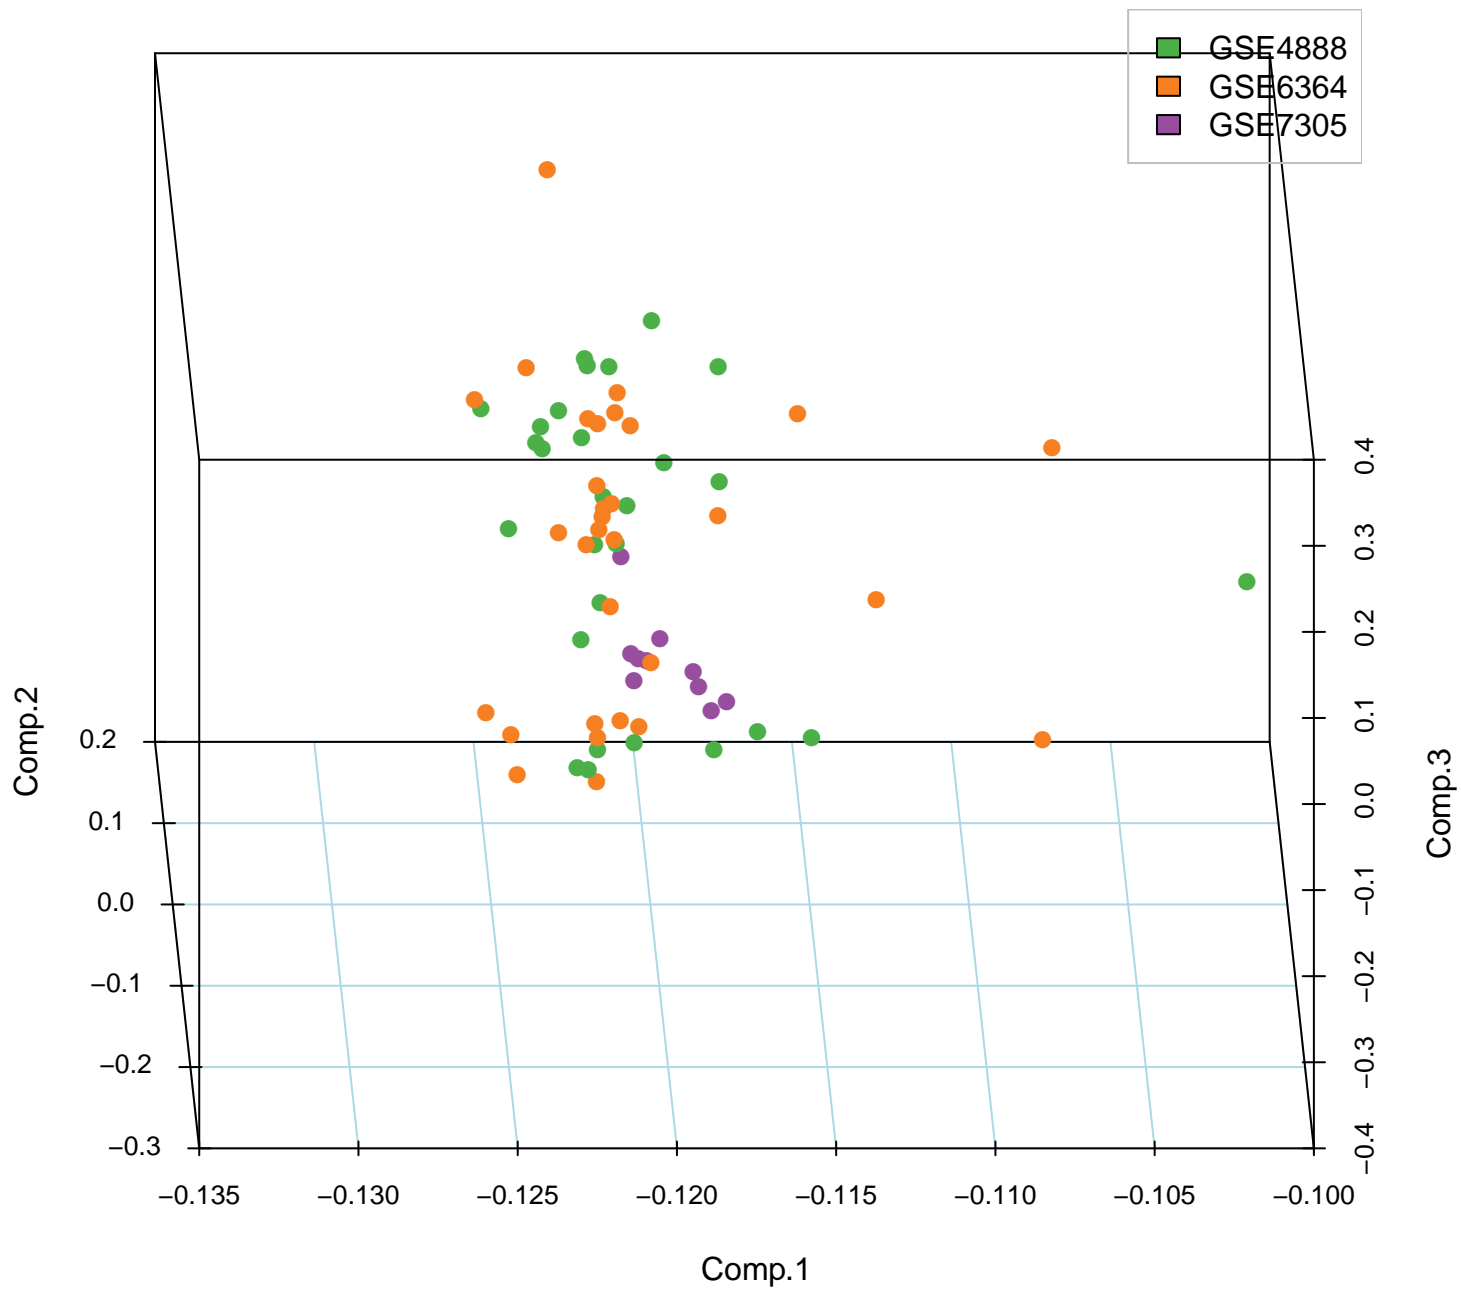

# PCA

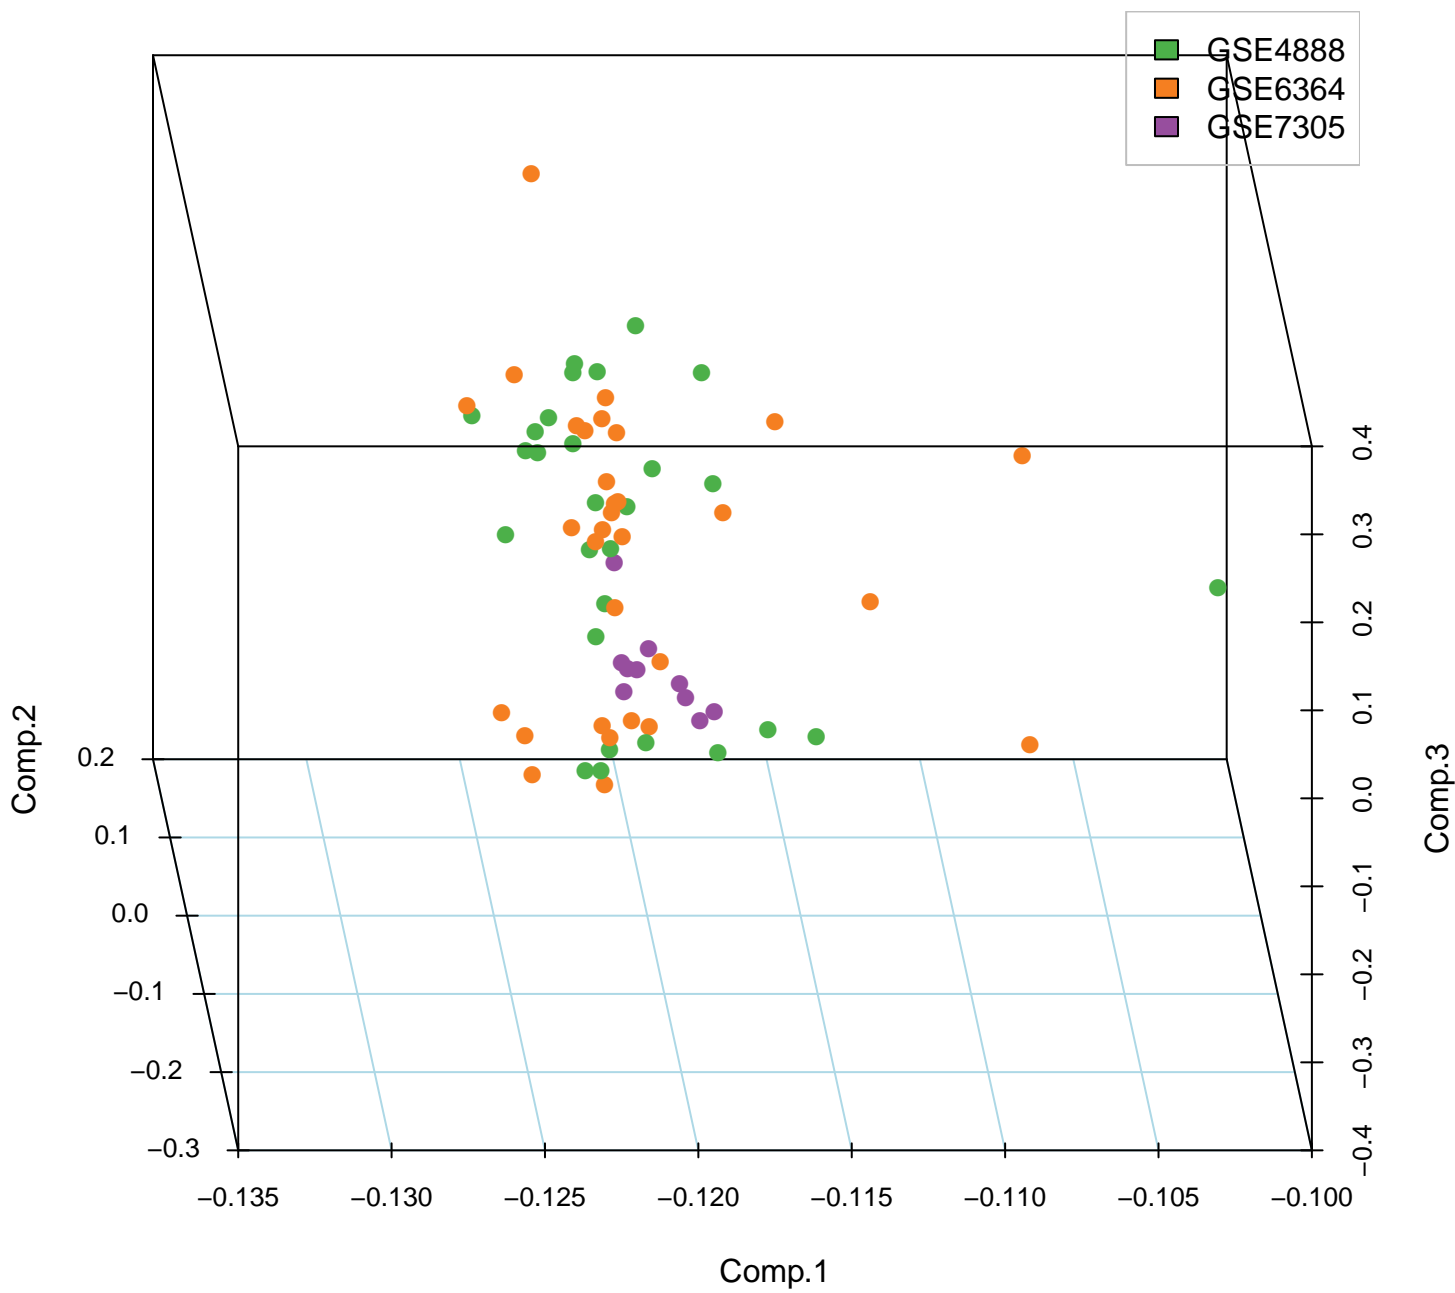

# PCA

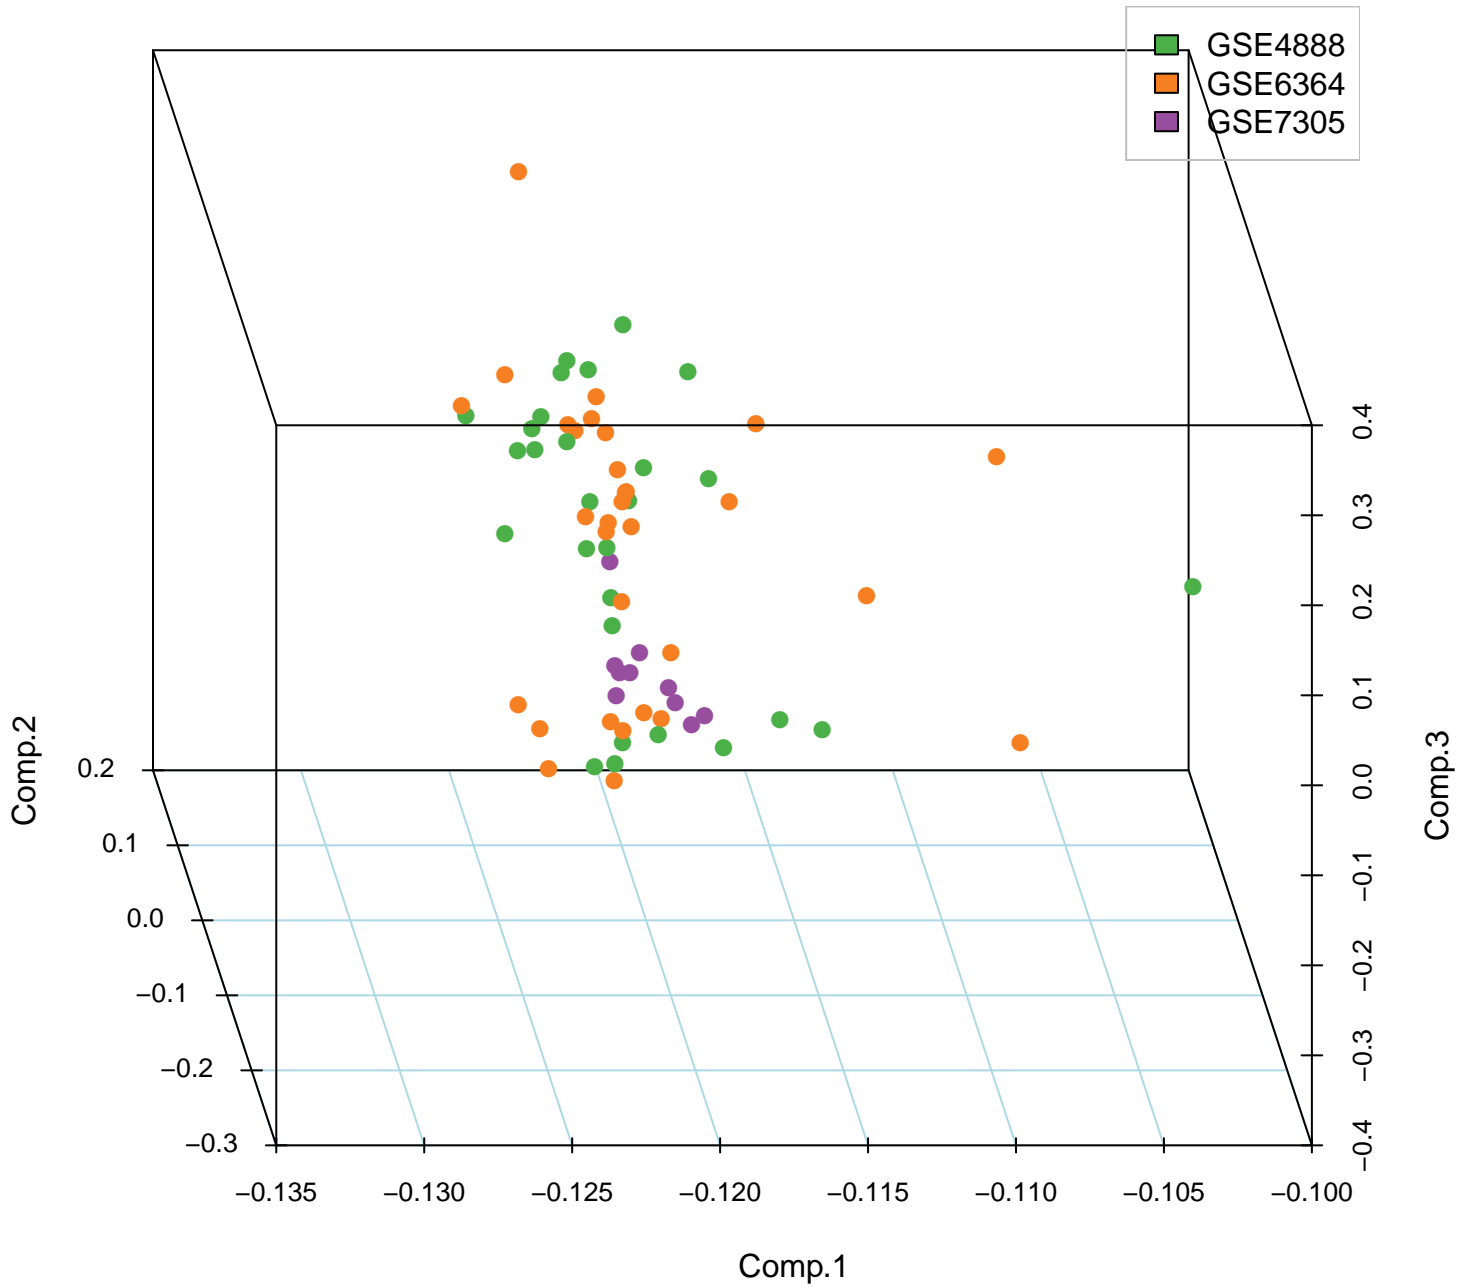

# PCA

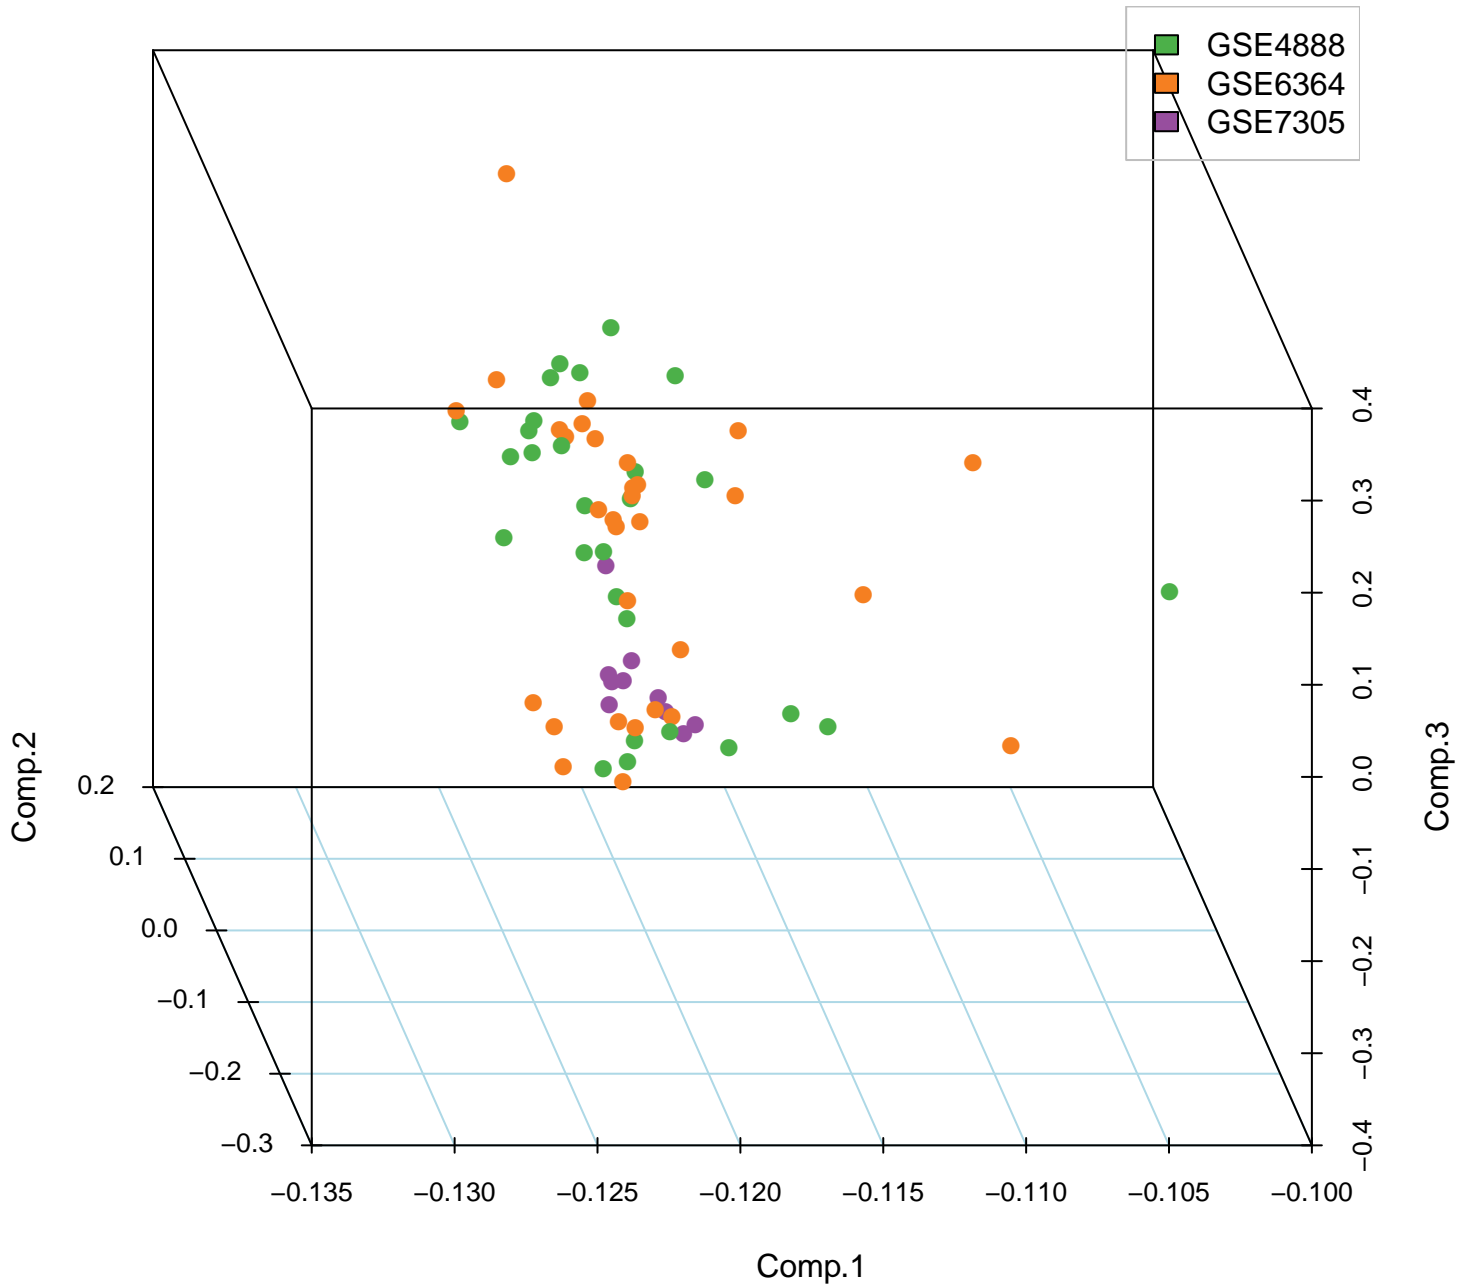

# PCA

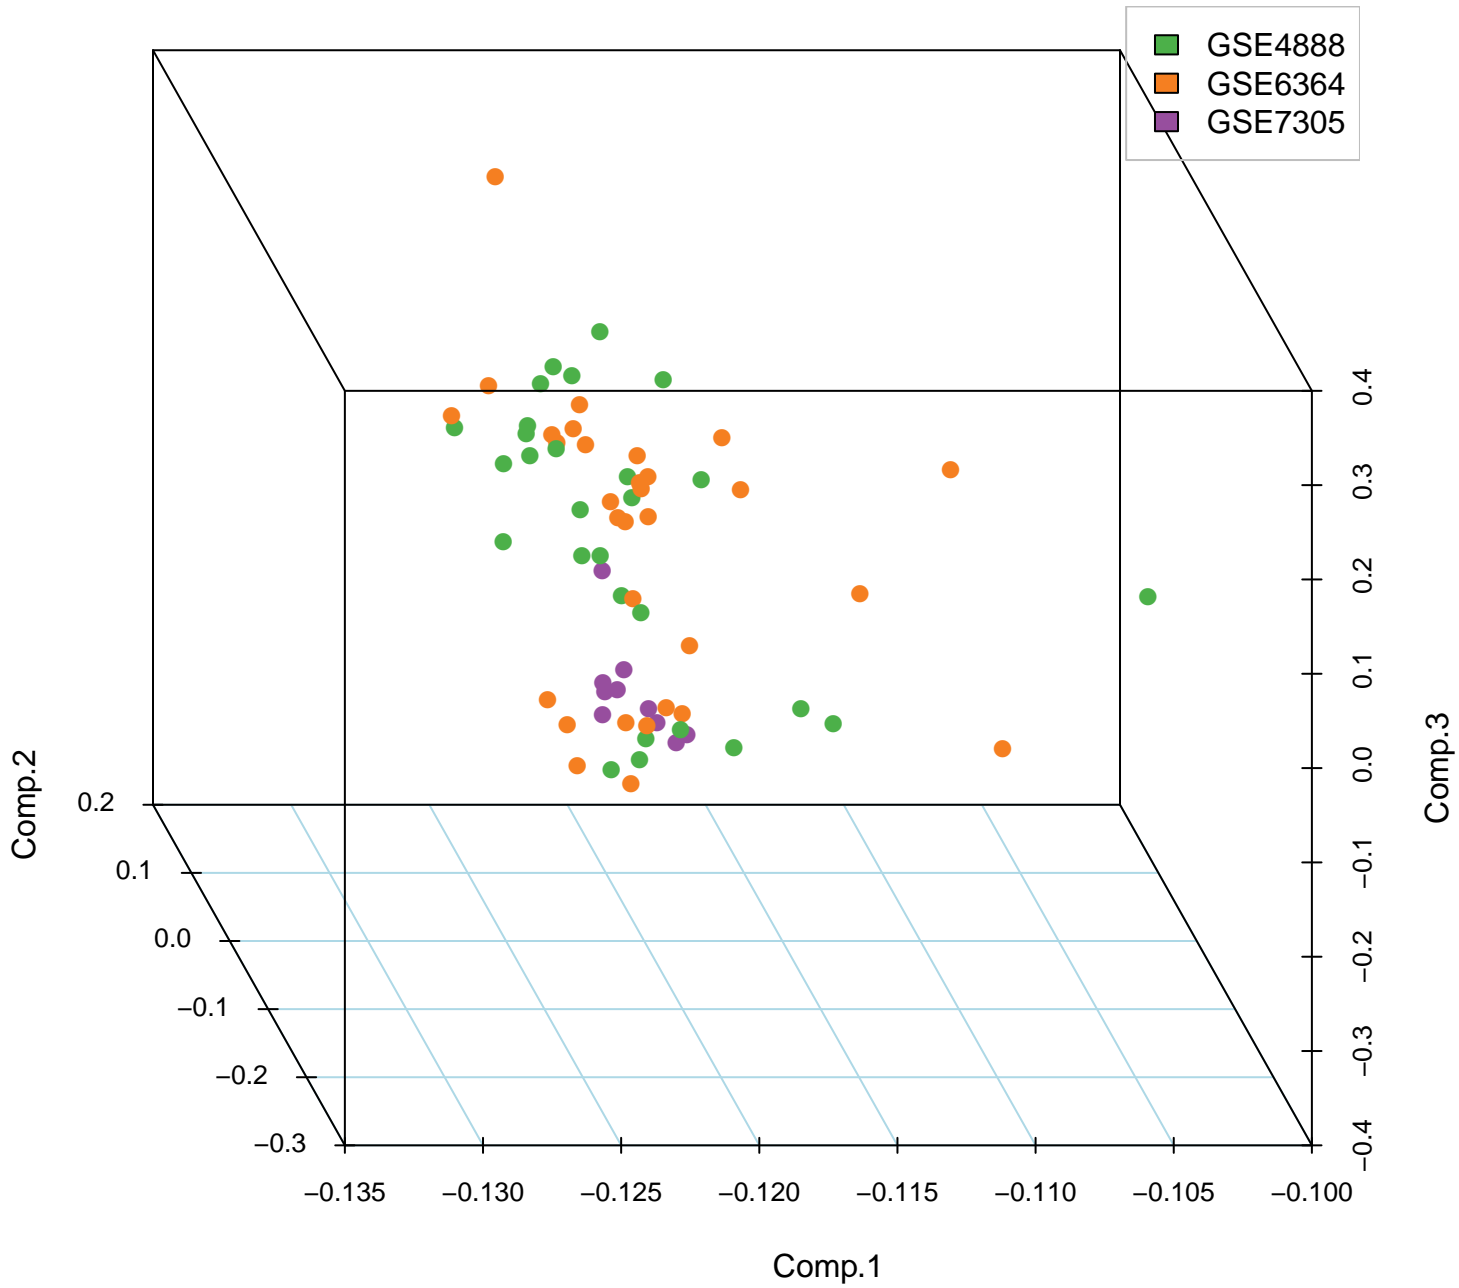



# PCA

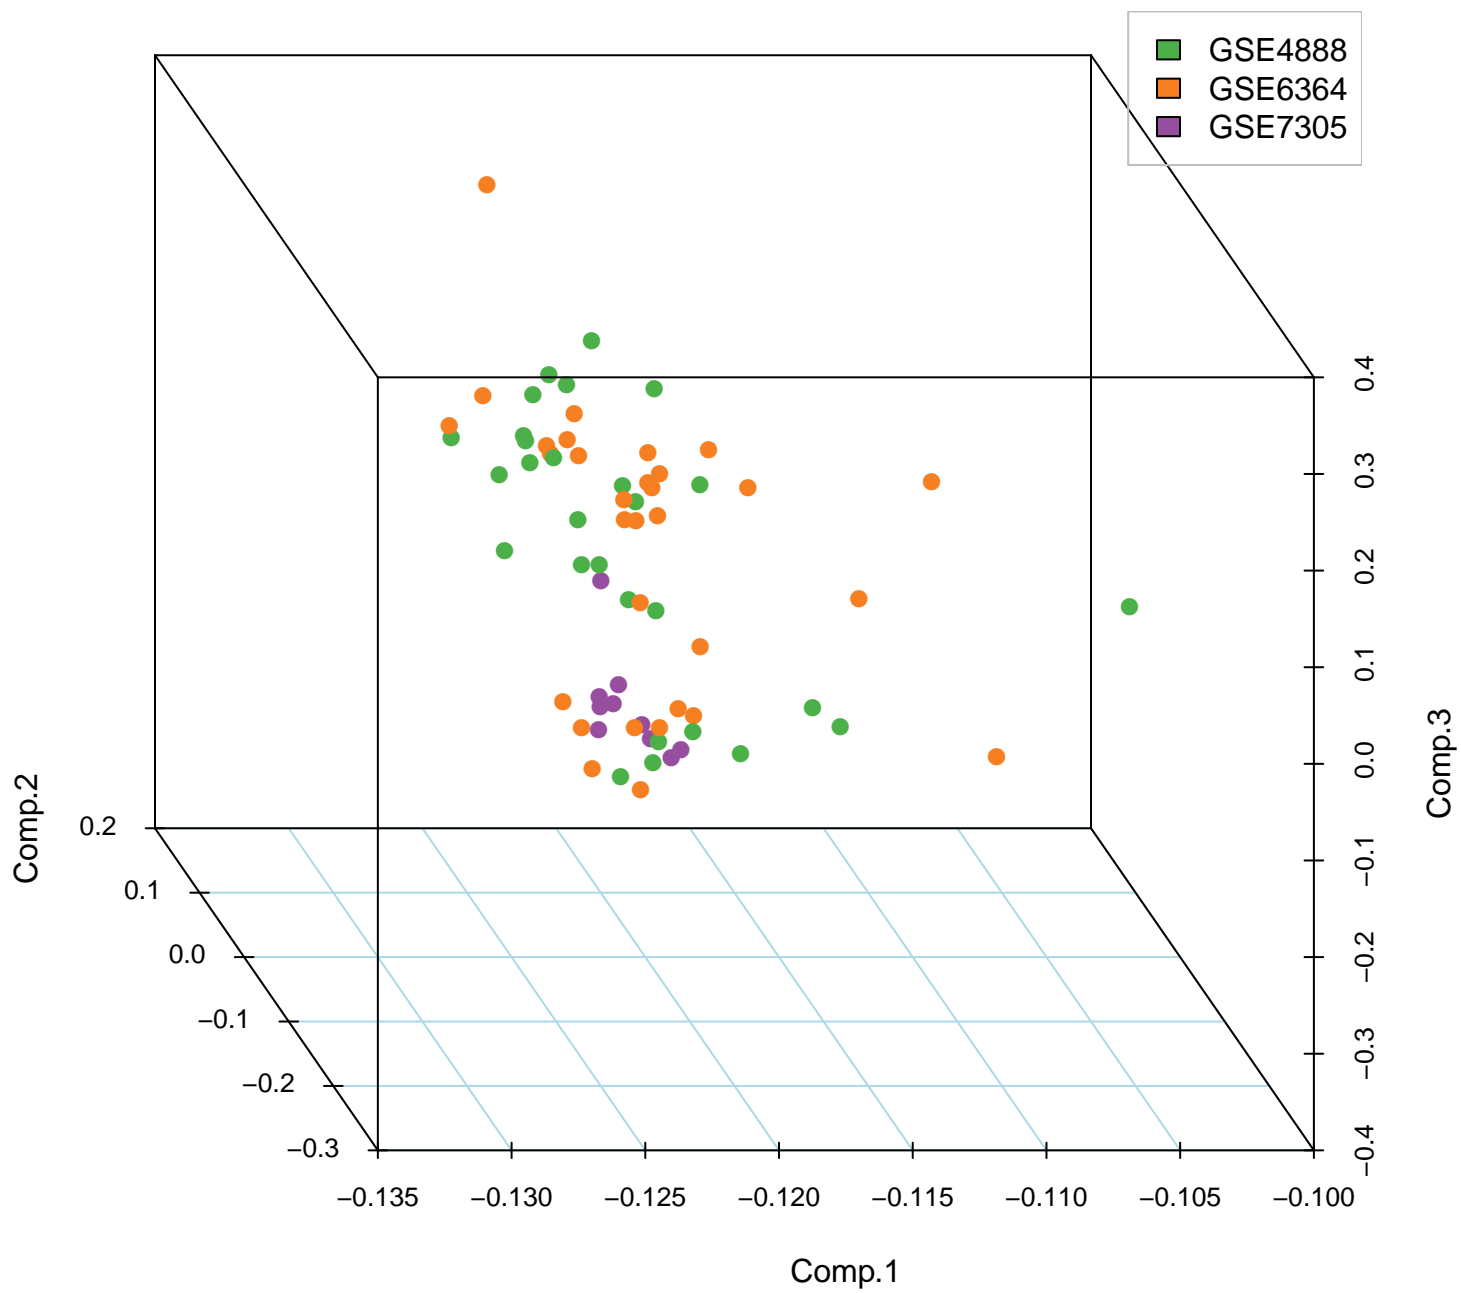

# PCA

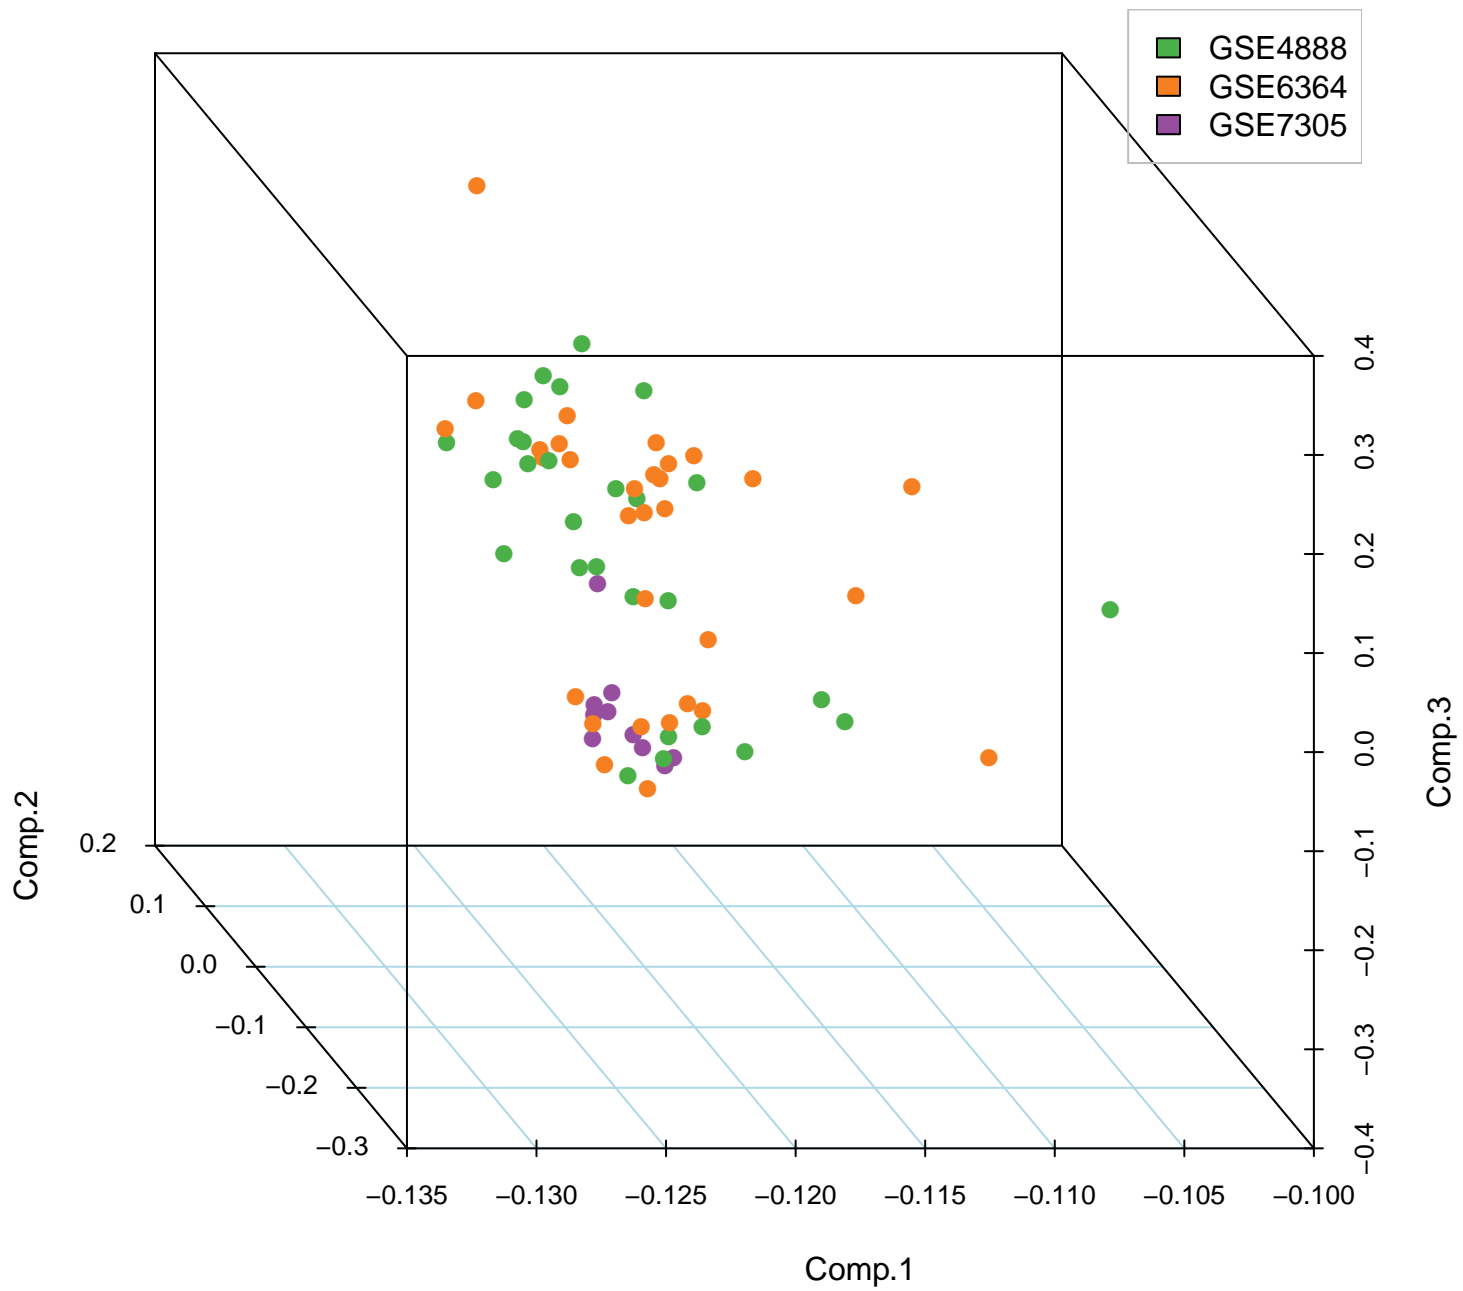

# PCA

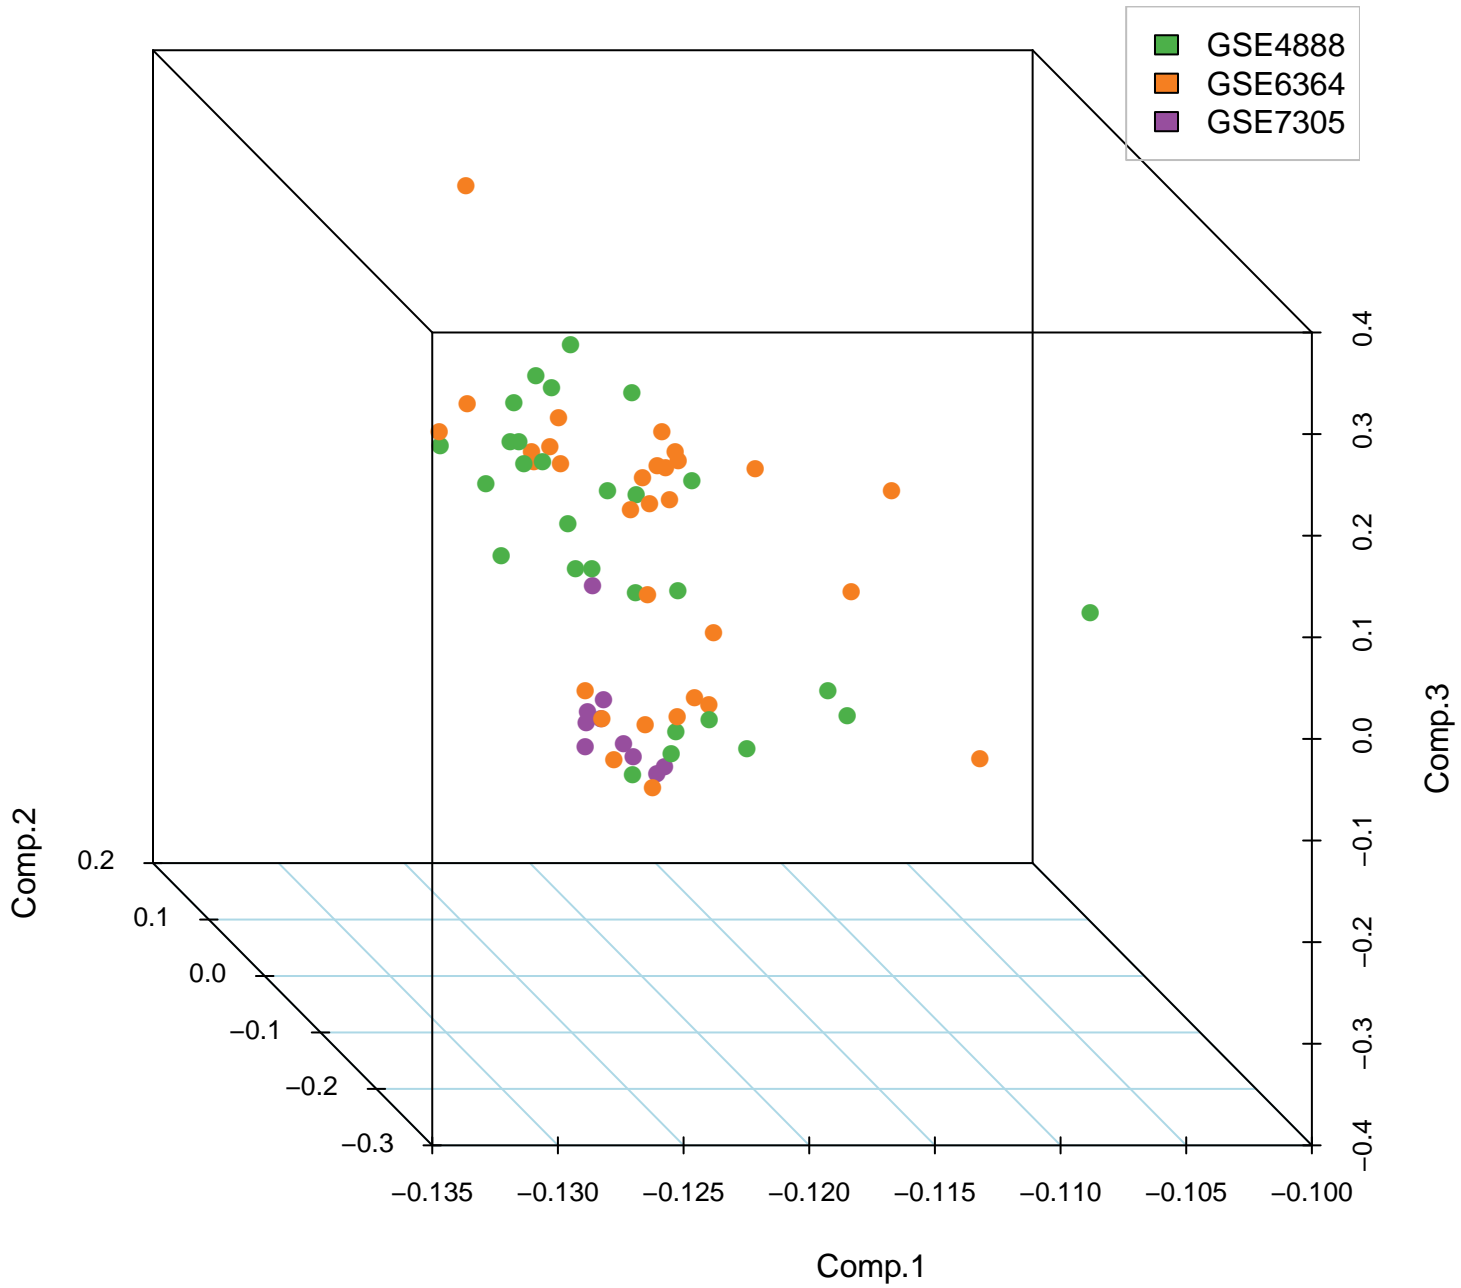

# PCA

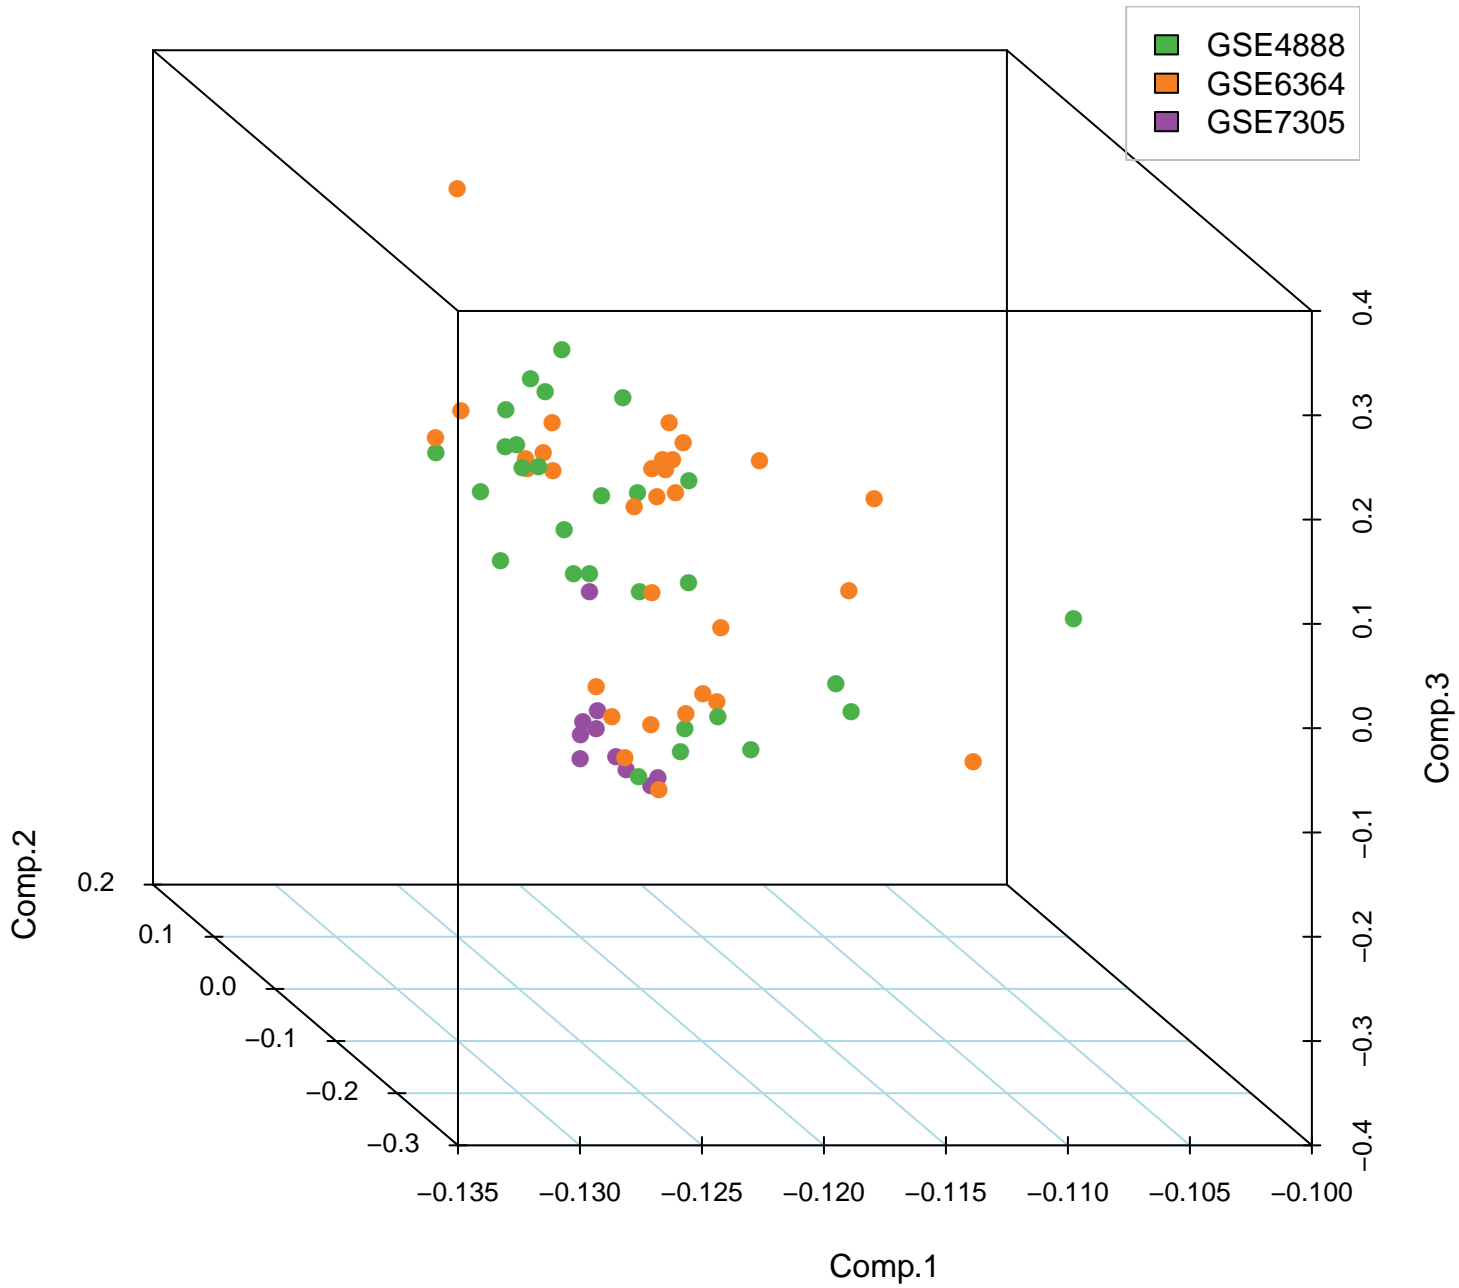

# PCA

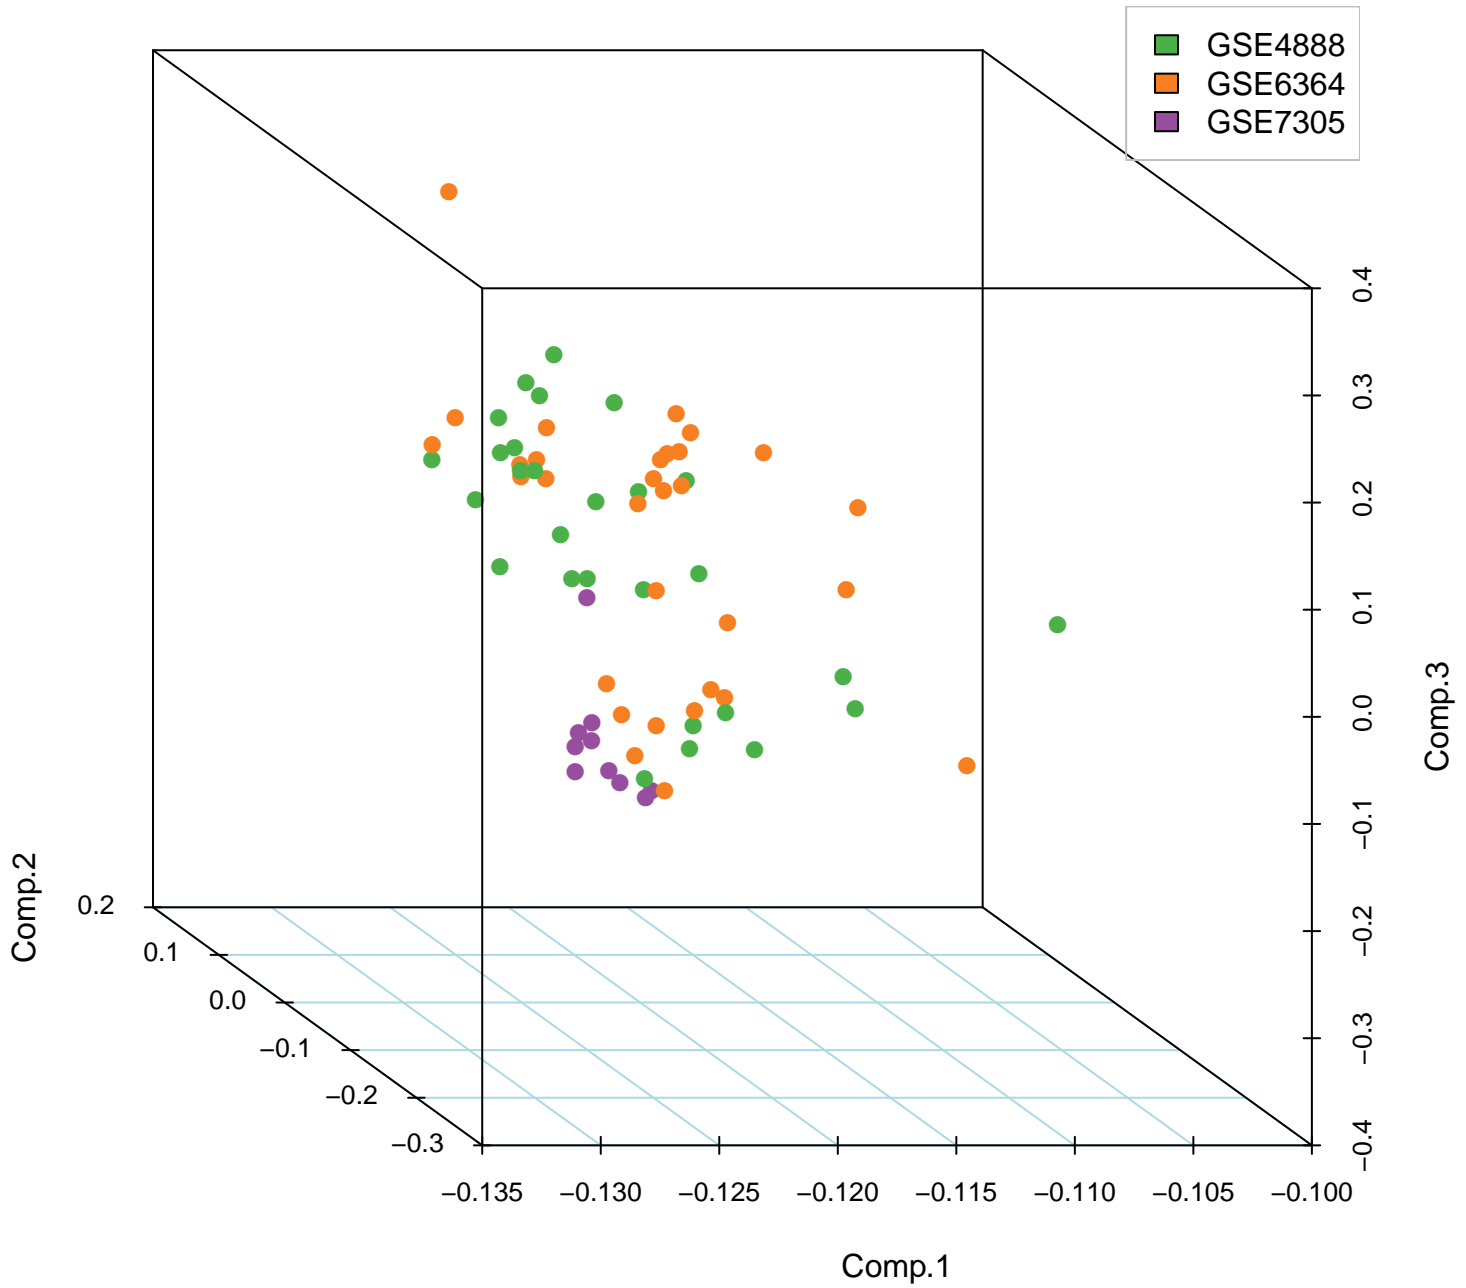

# PCA

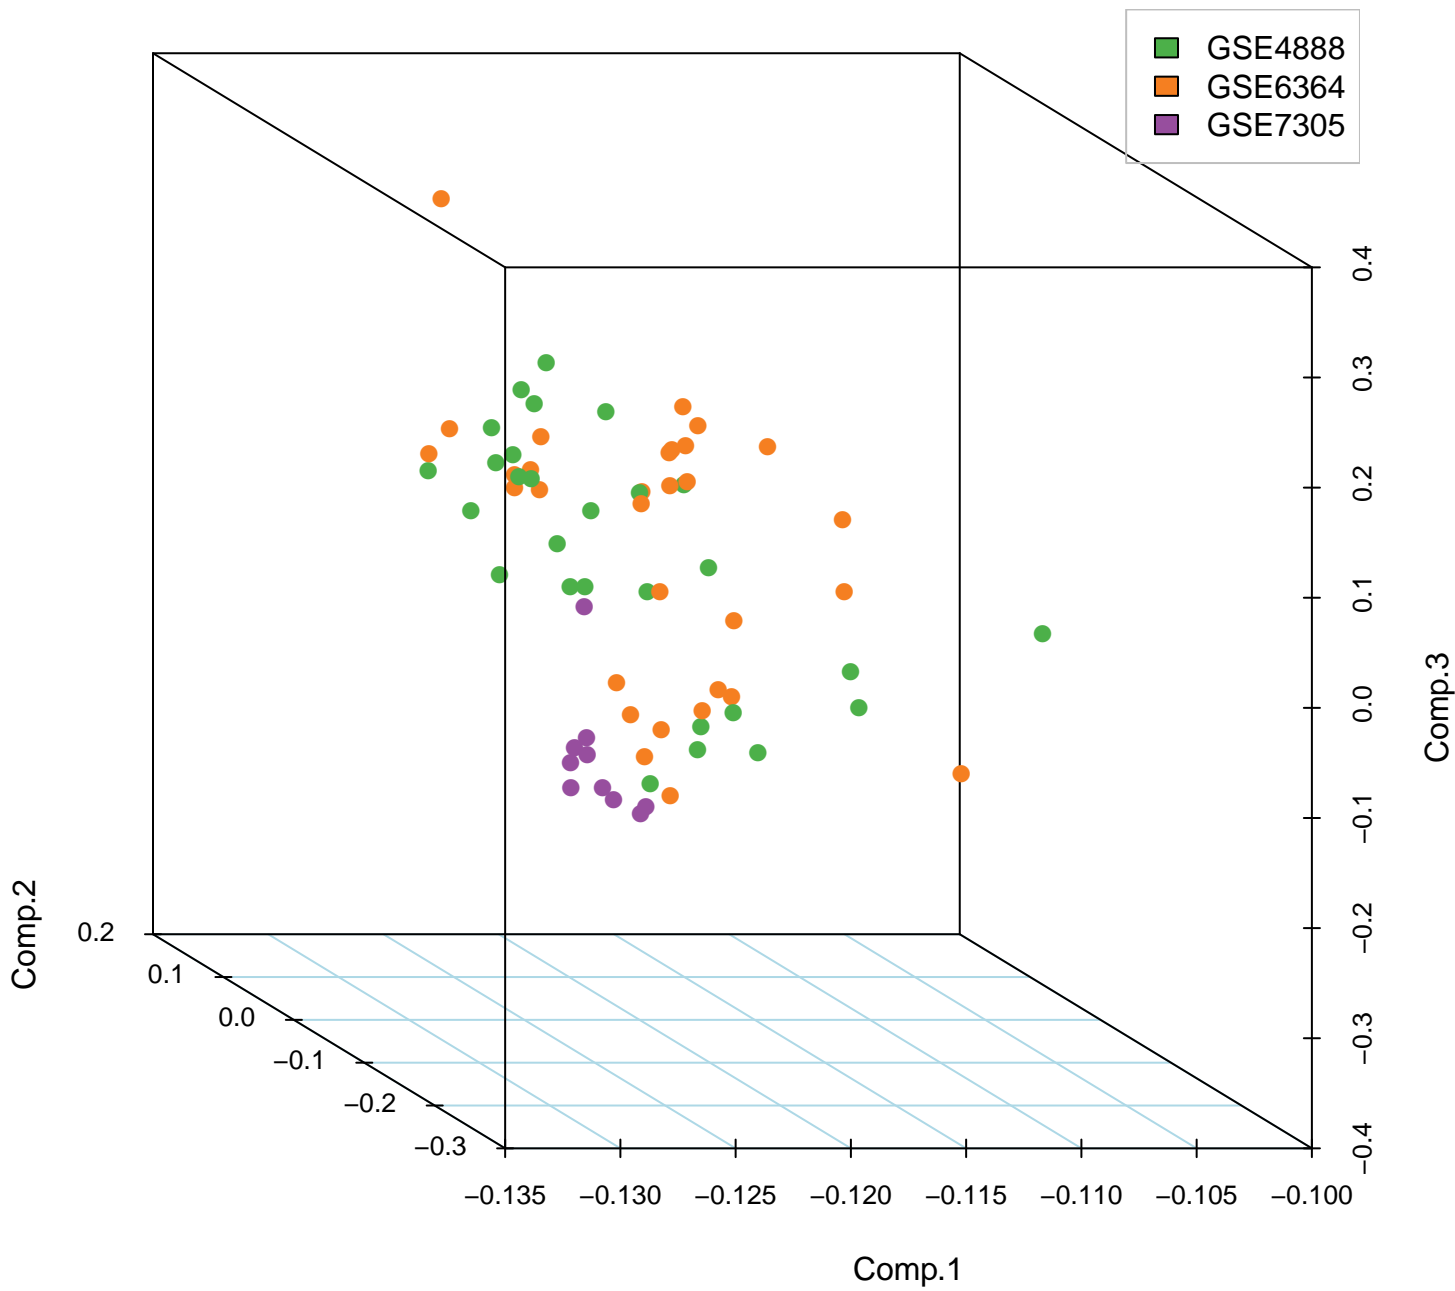

# PCA

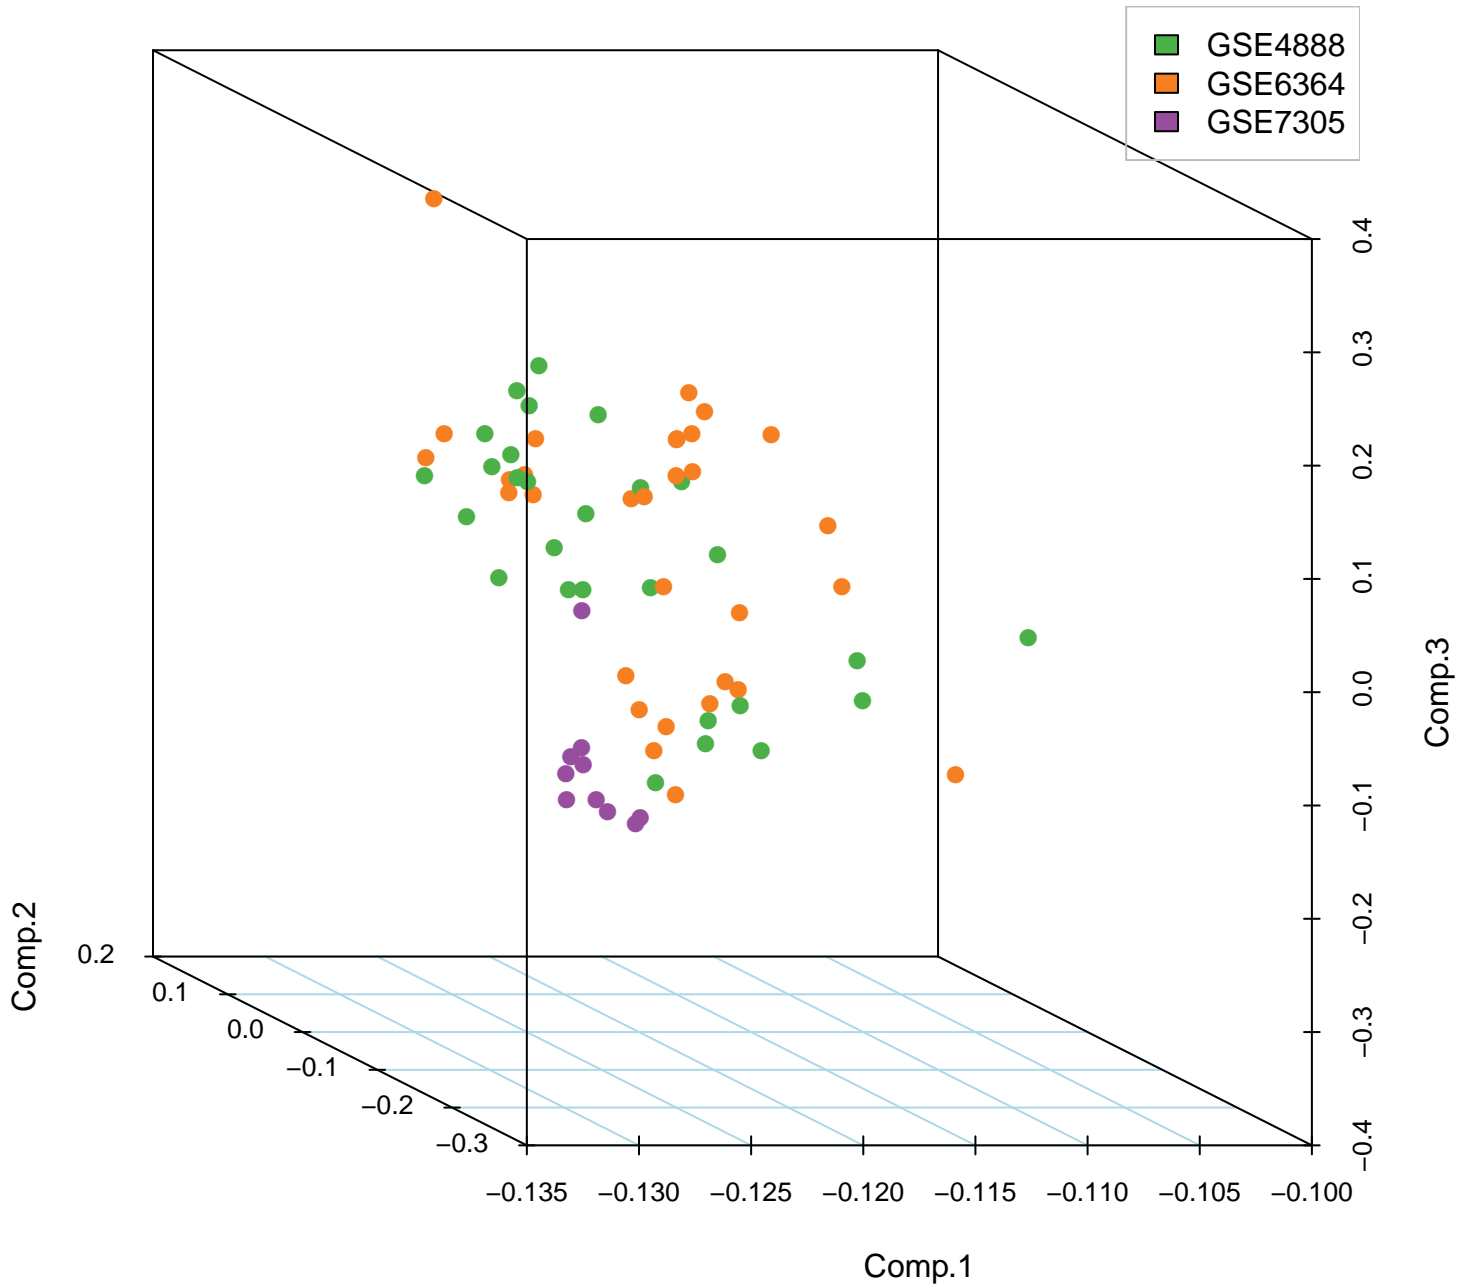

# PCA

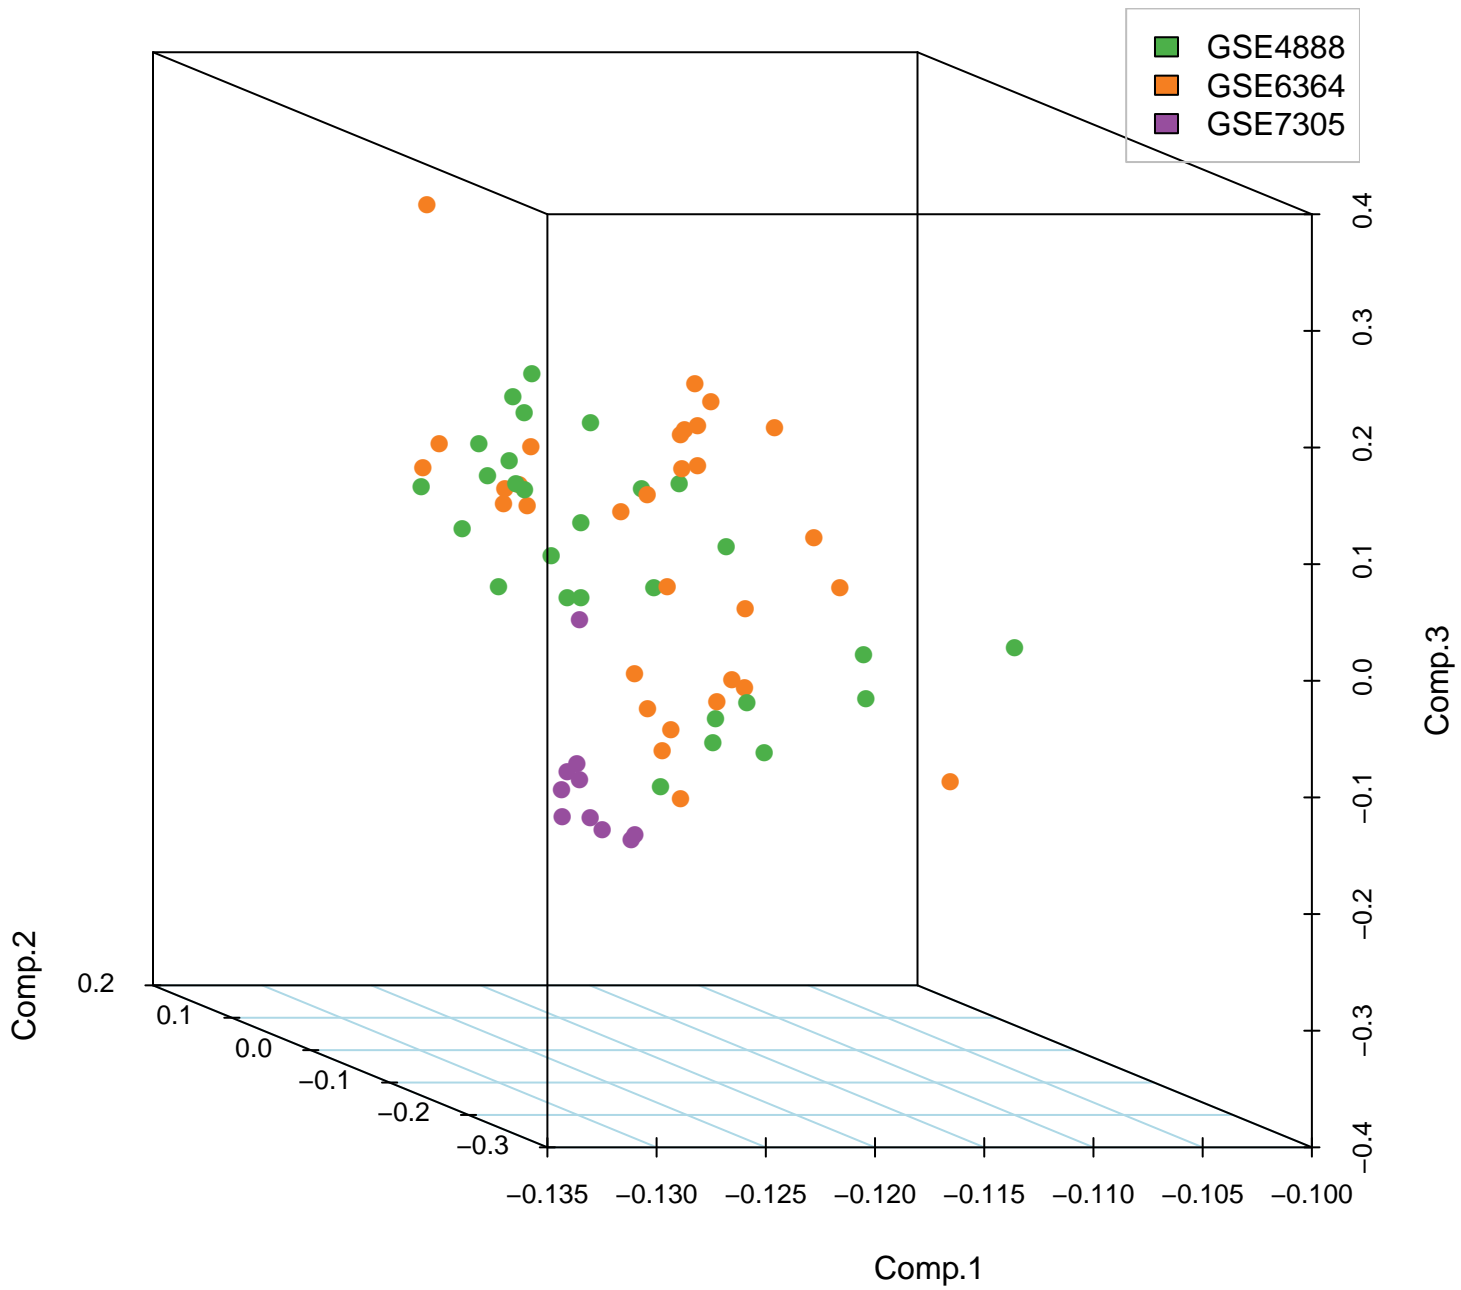



# PCA

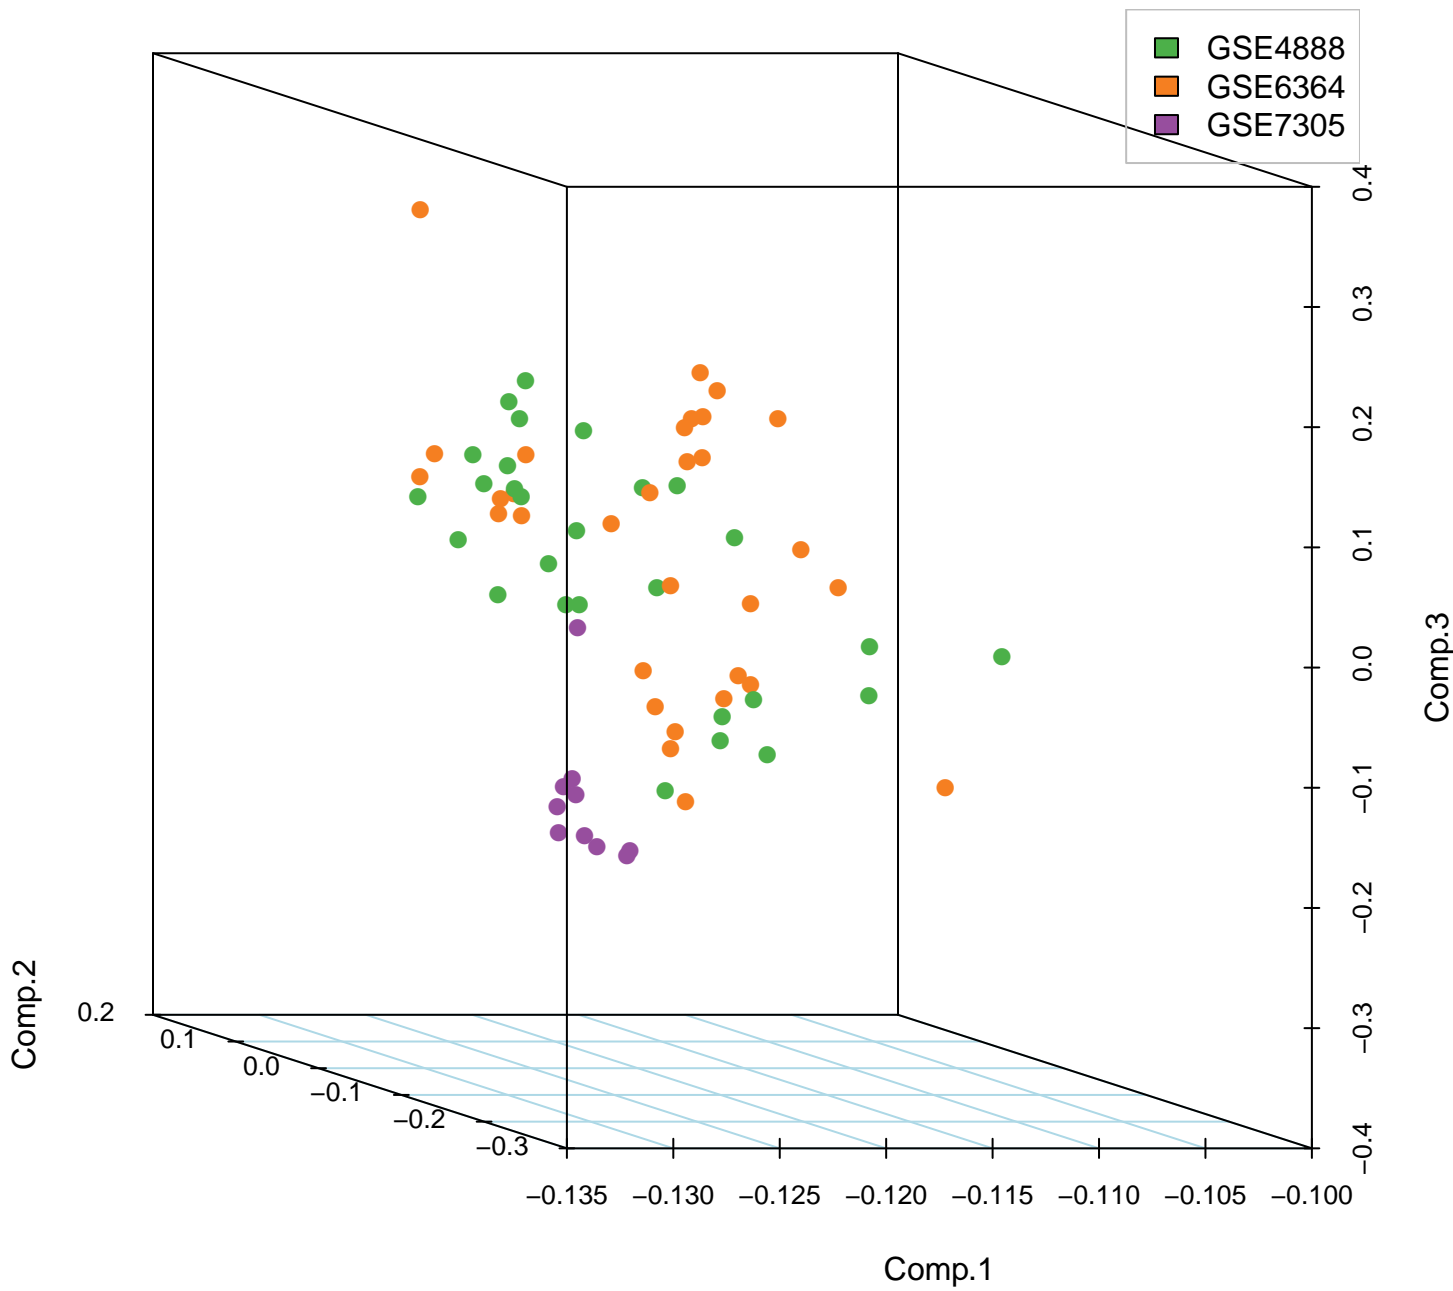

# PCA

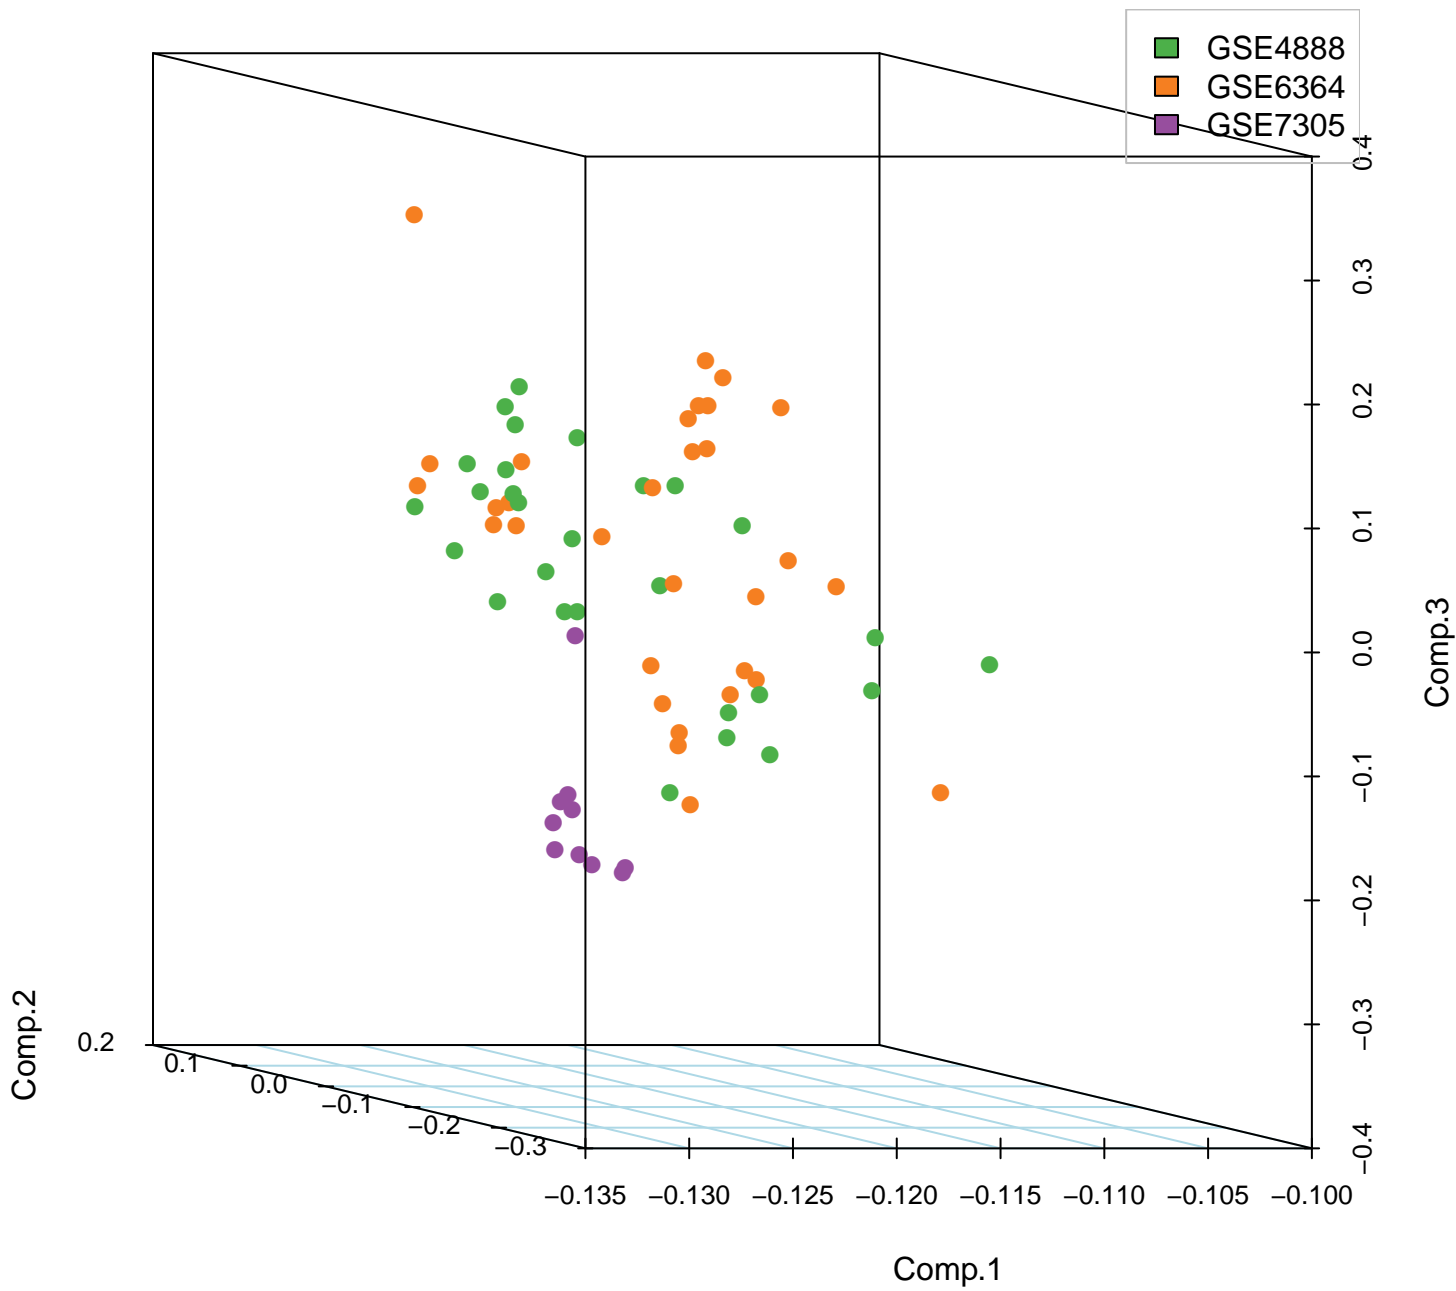

# PCA

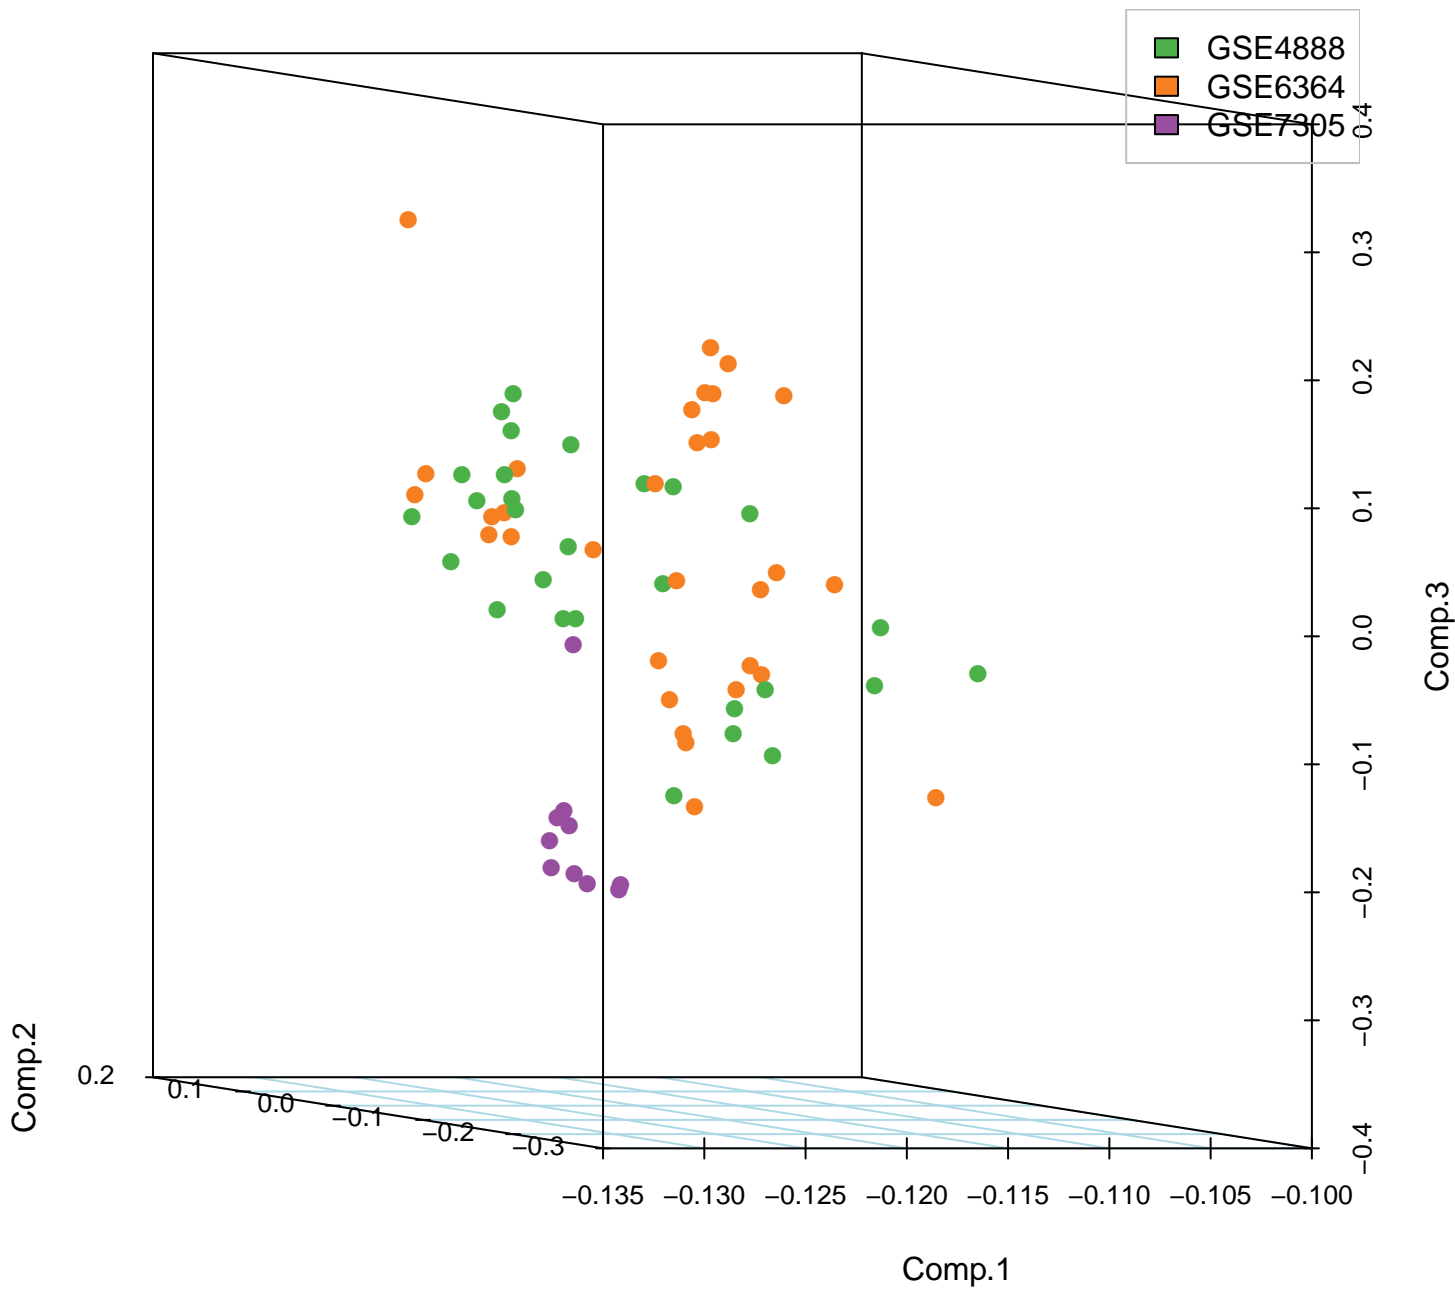

# PCA

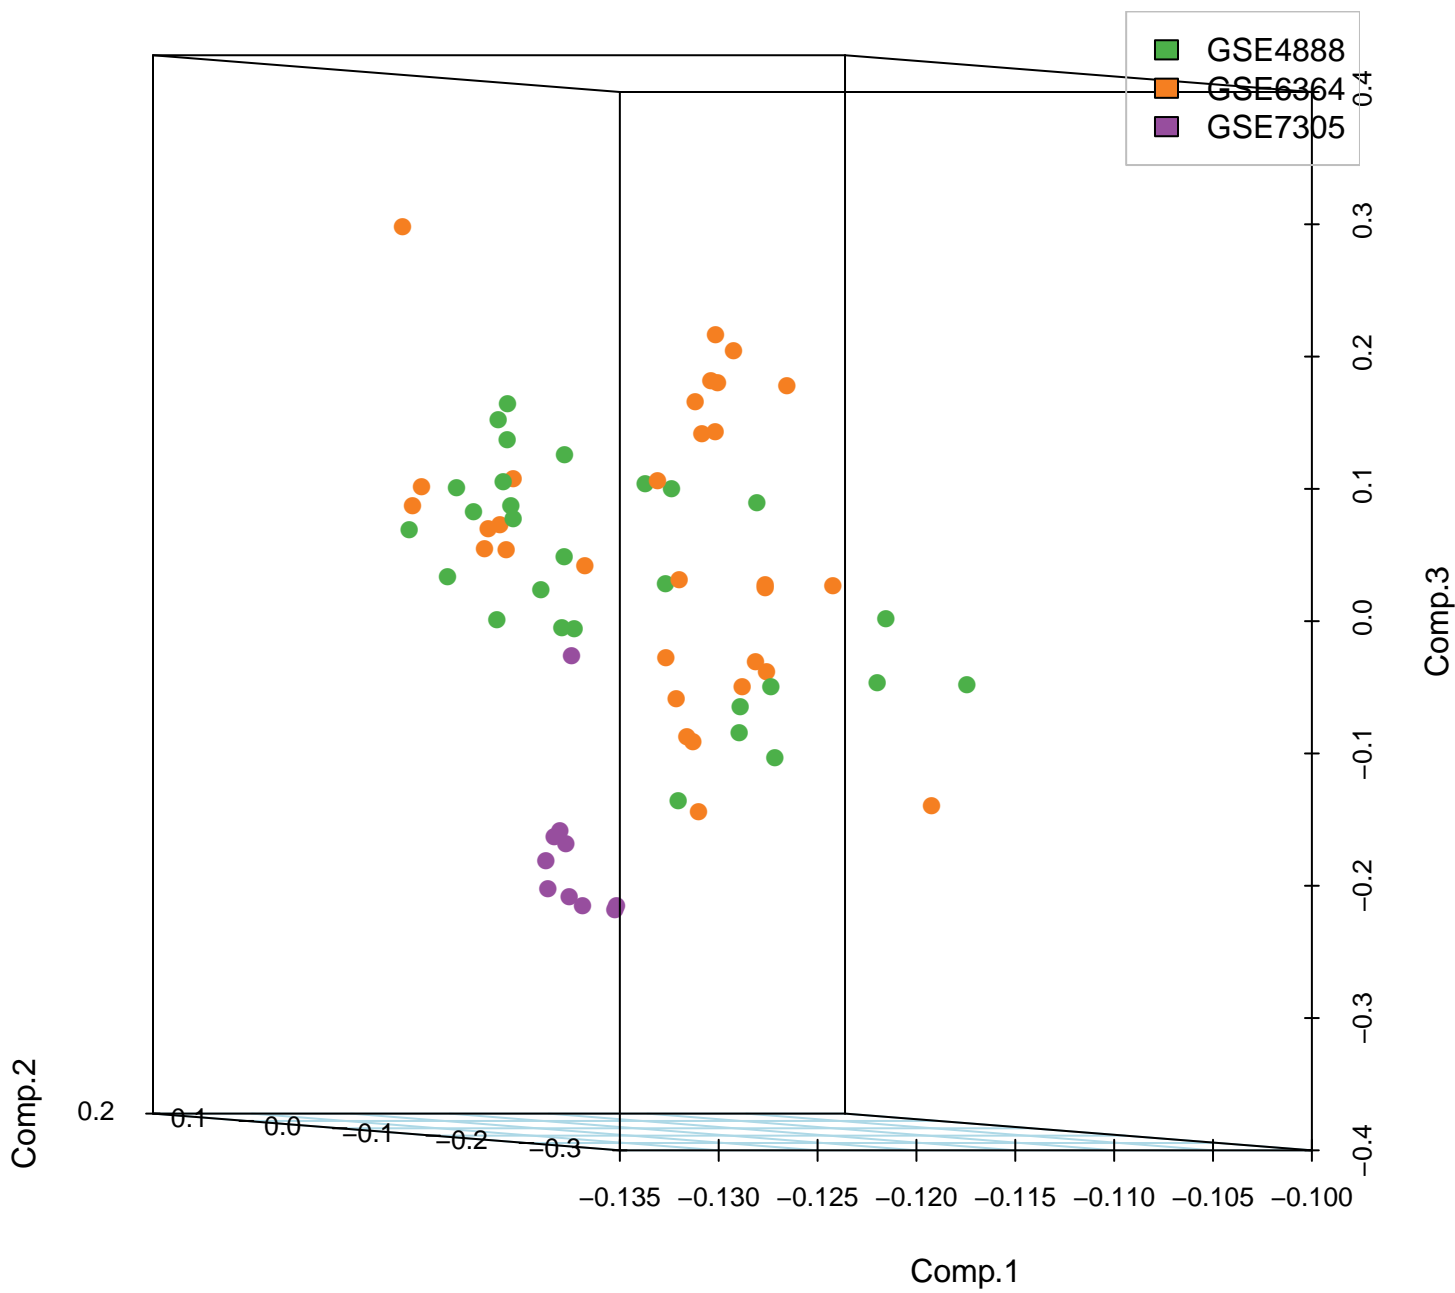

# PCA

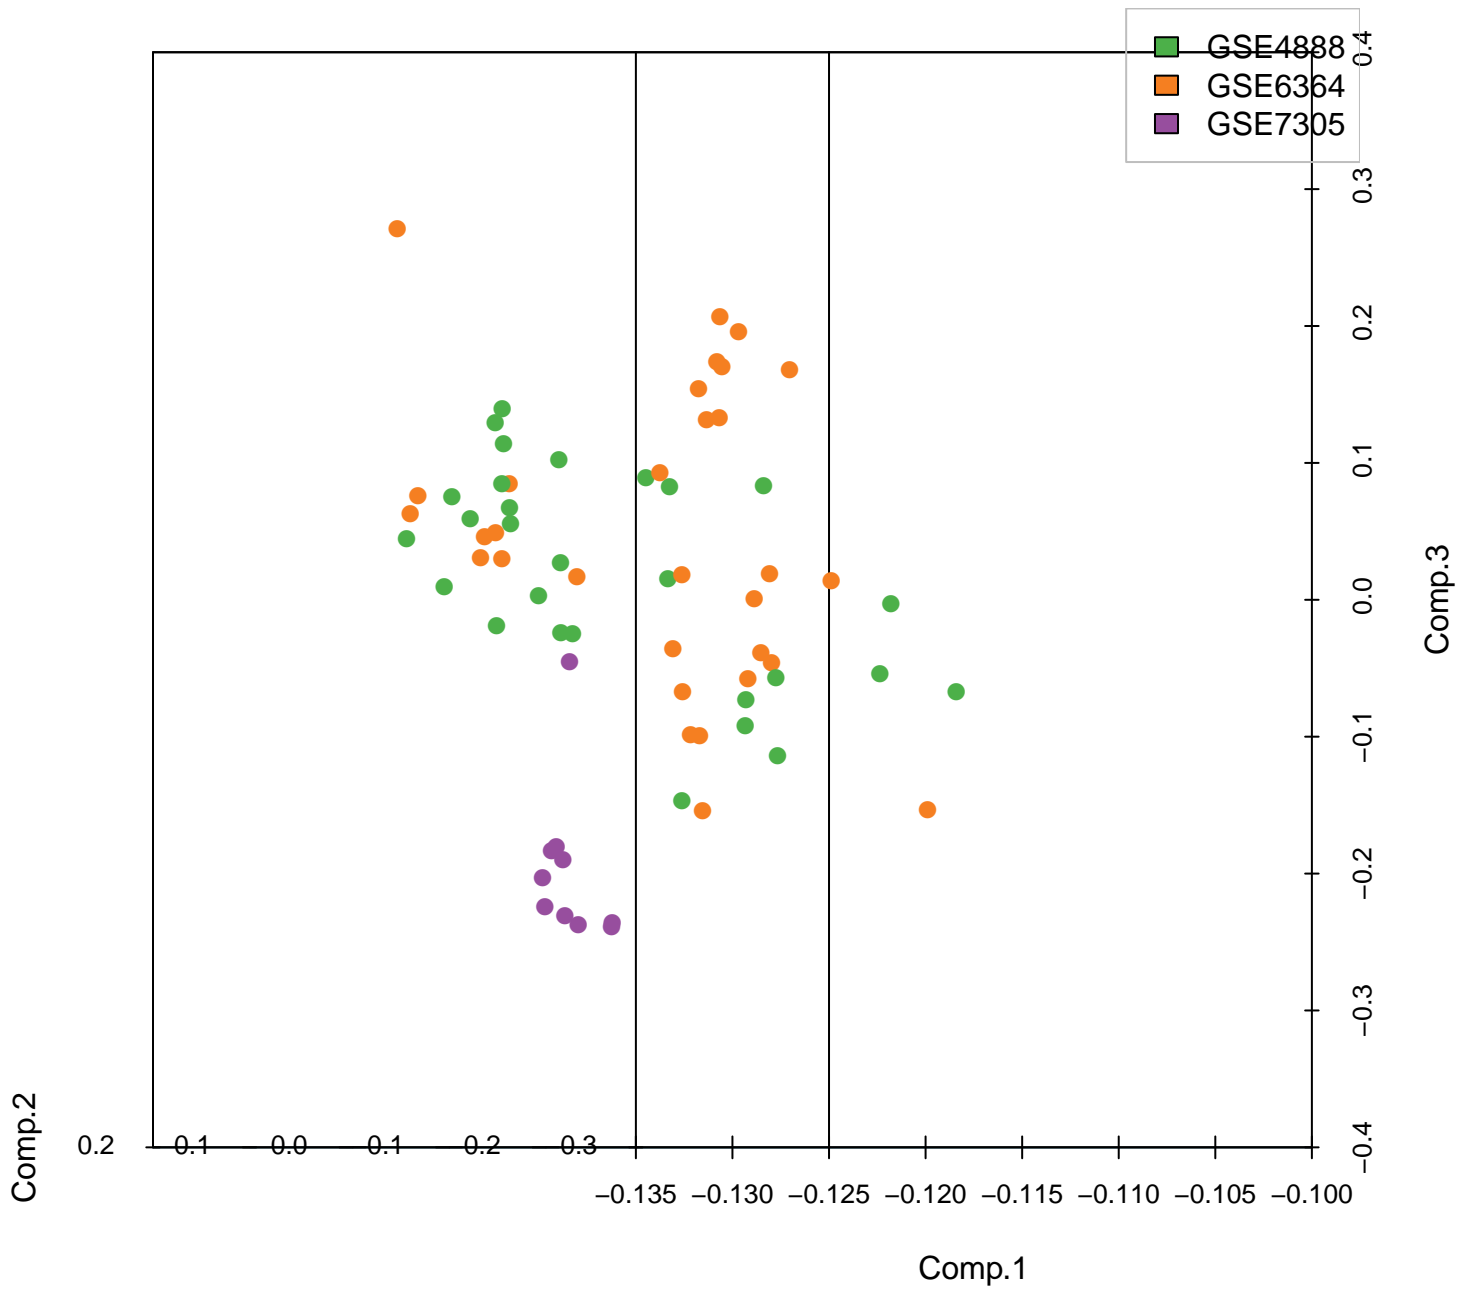

# PCA

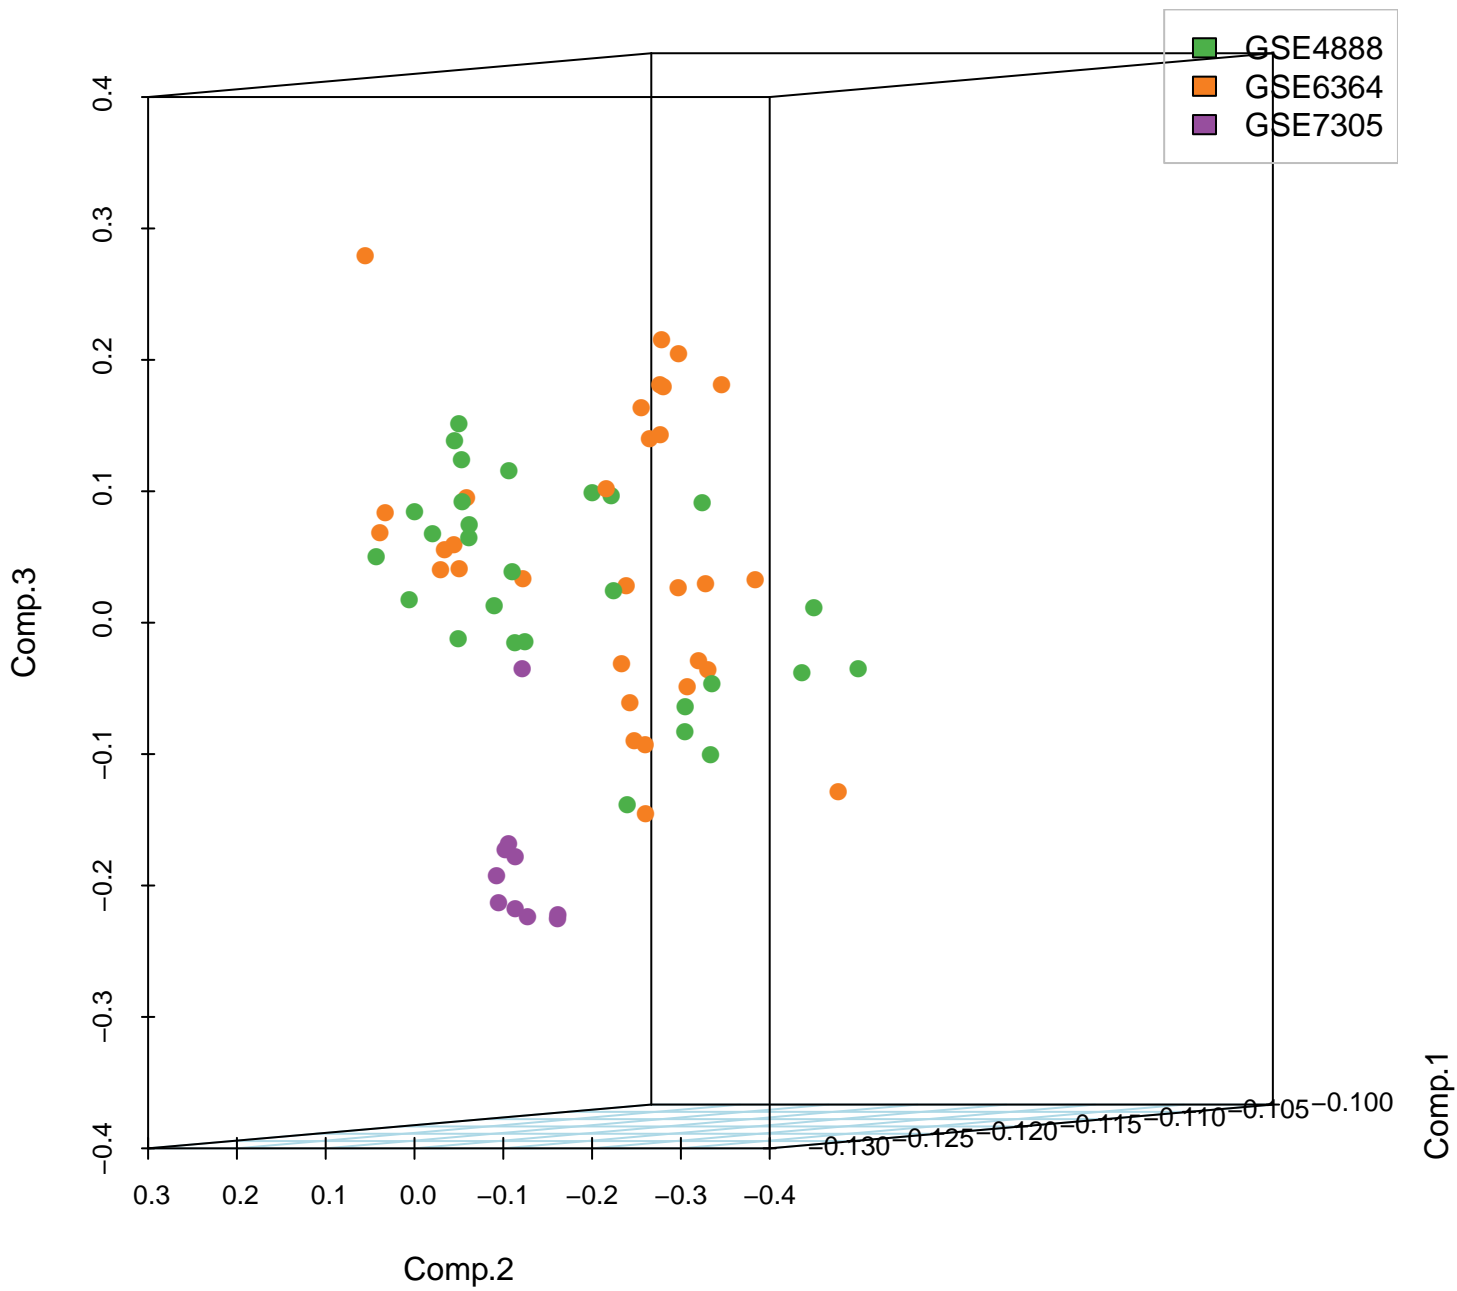

# PCA

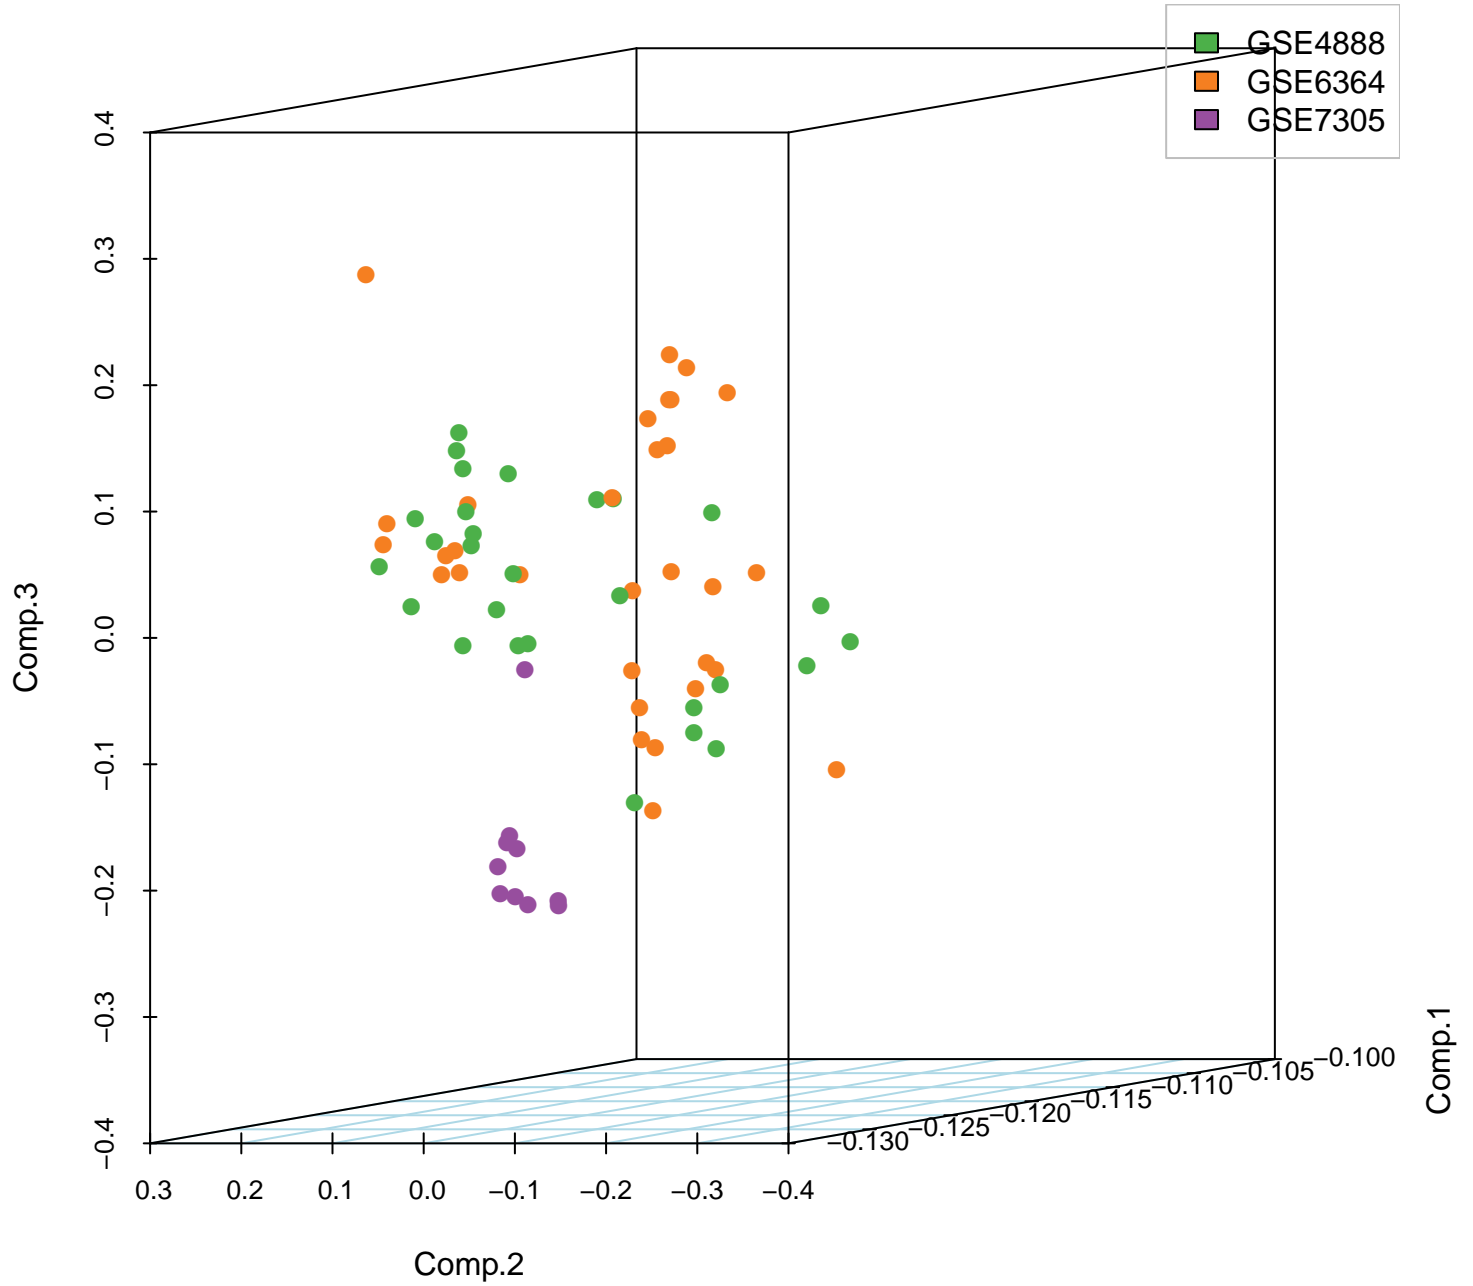

# PCA

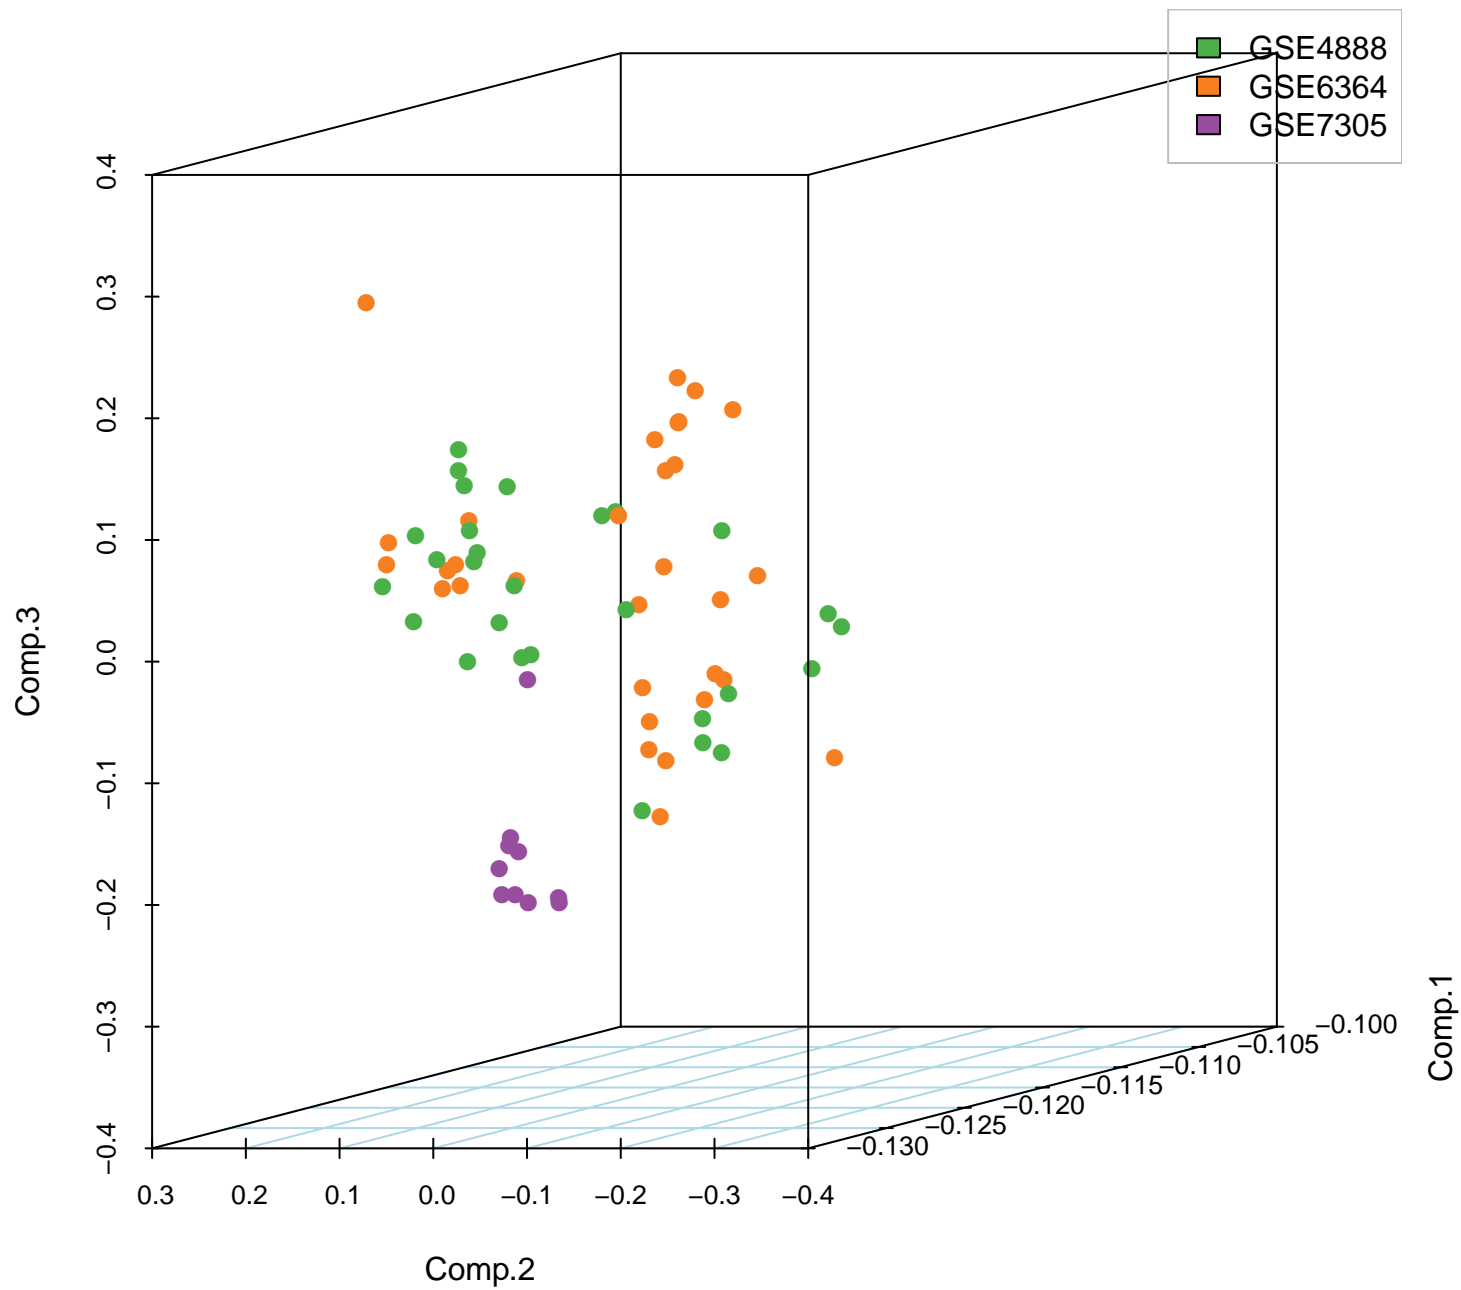



# PCA

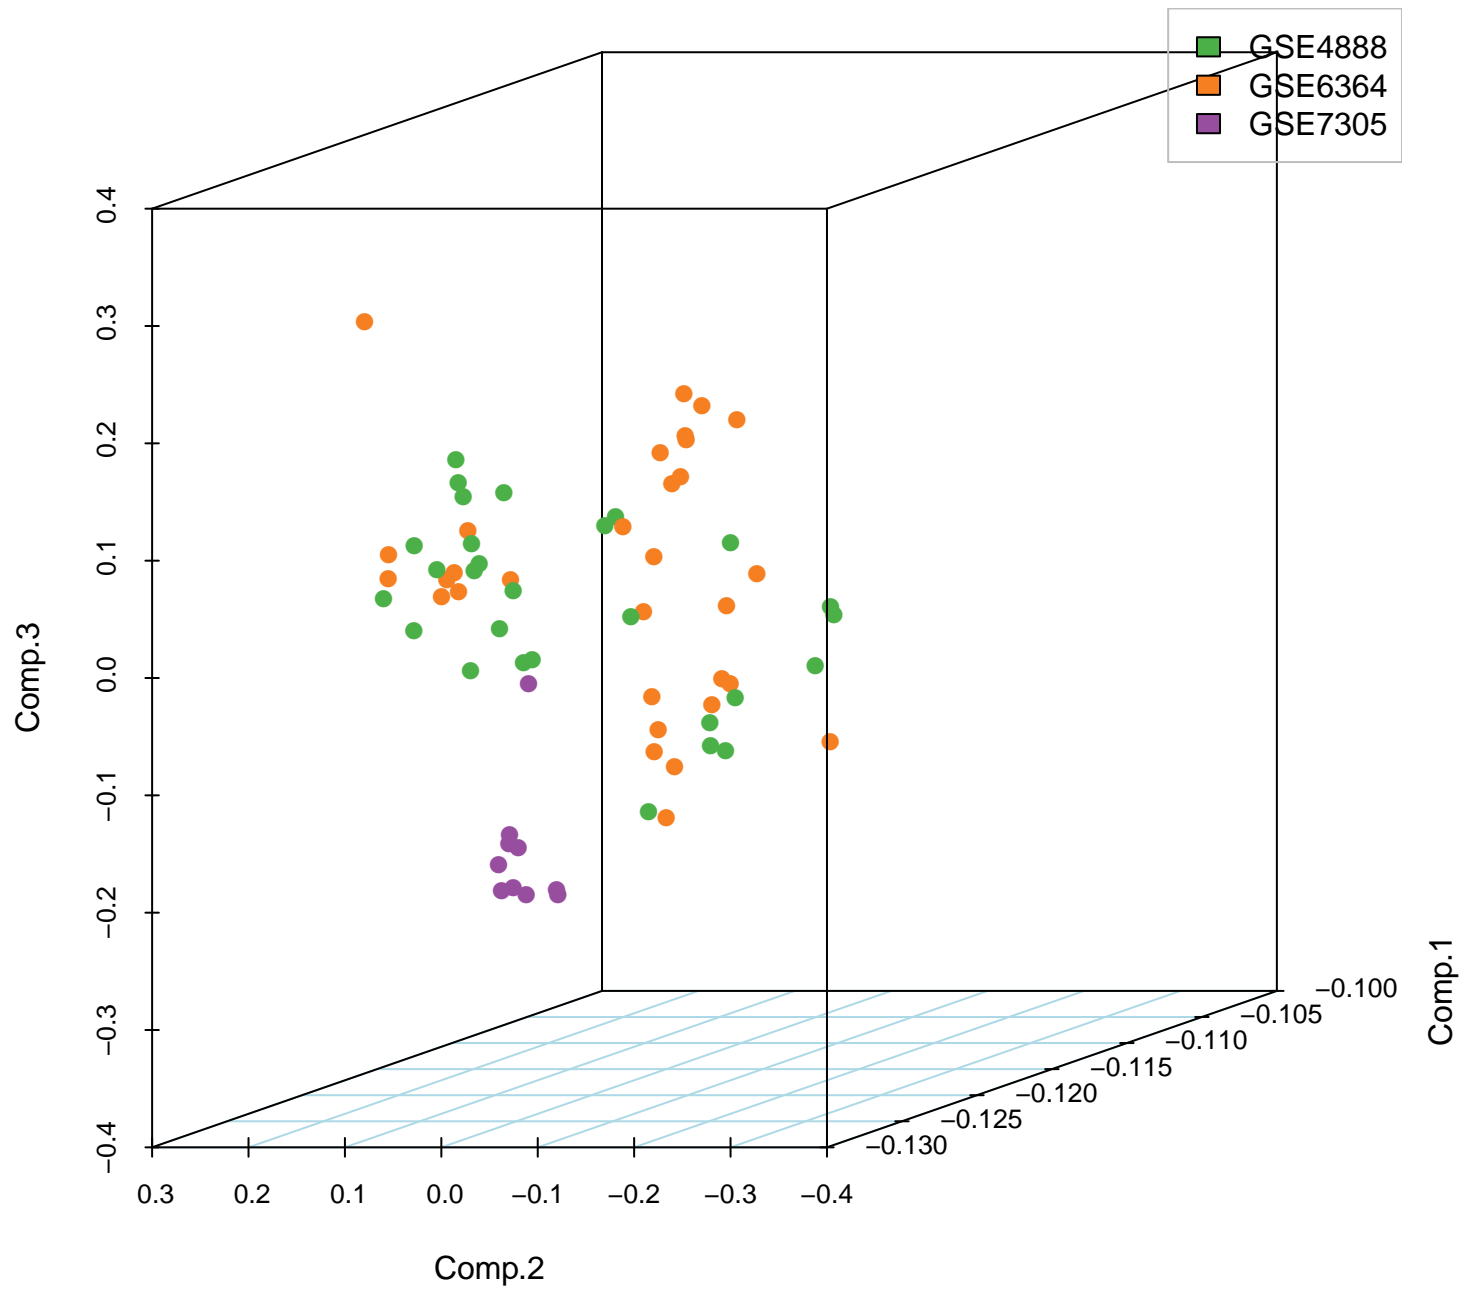

# PCA

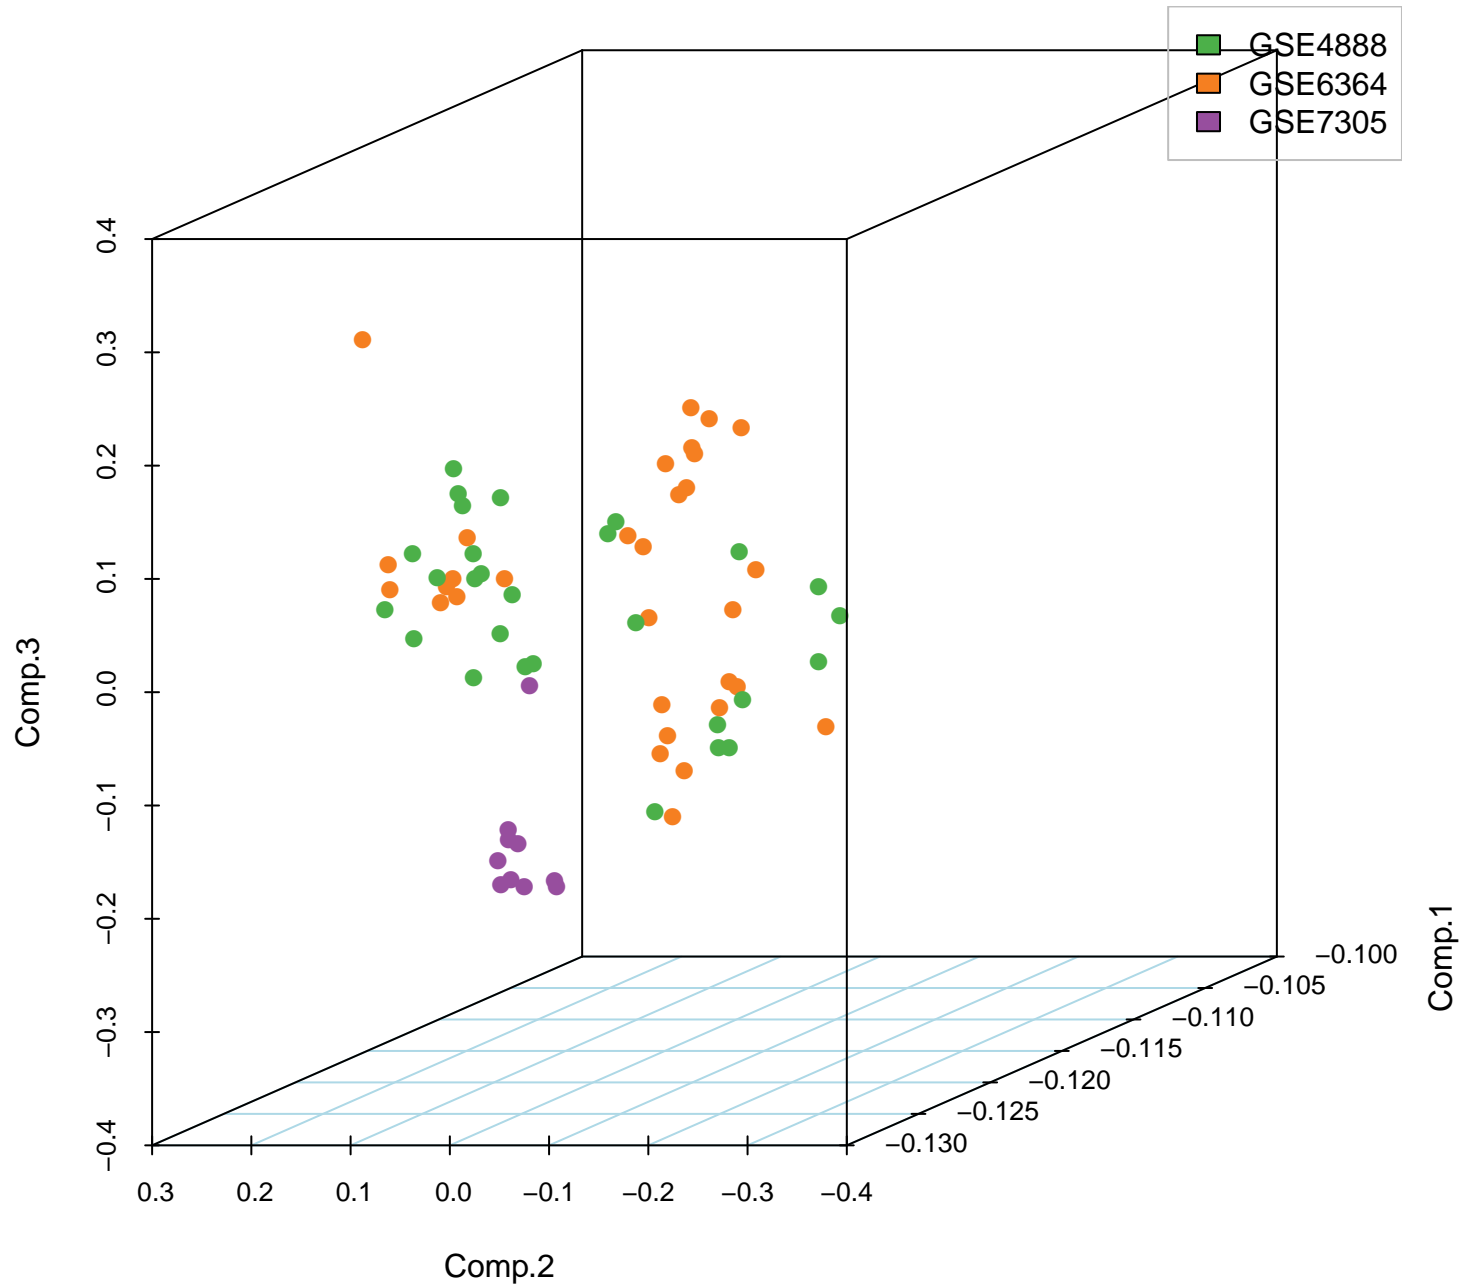

# PCA

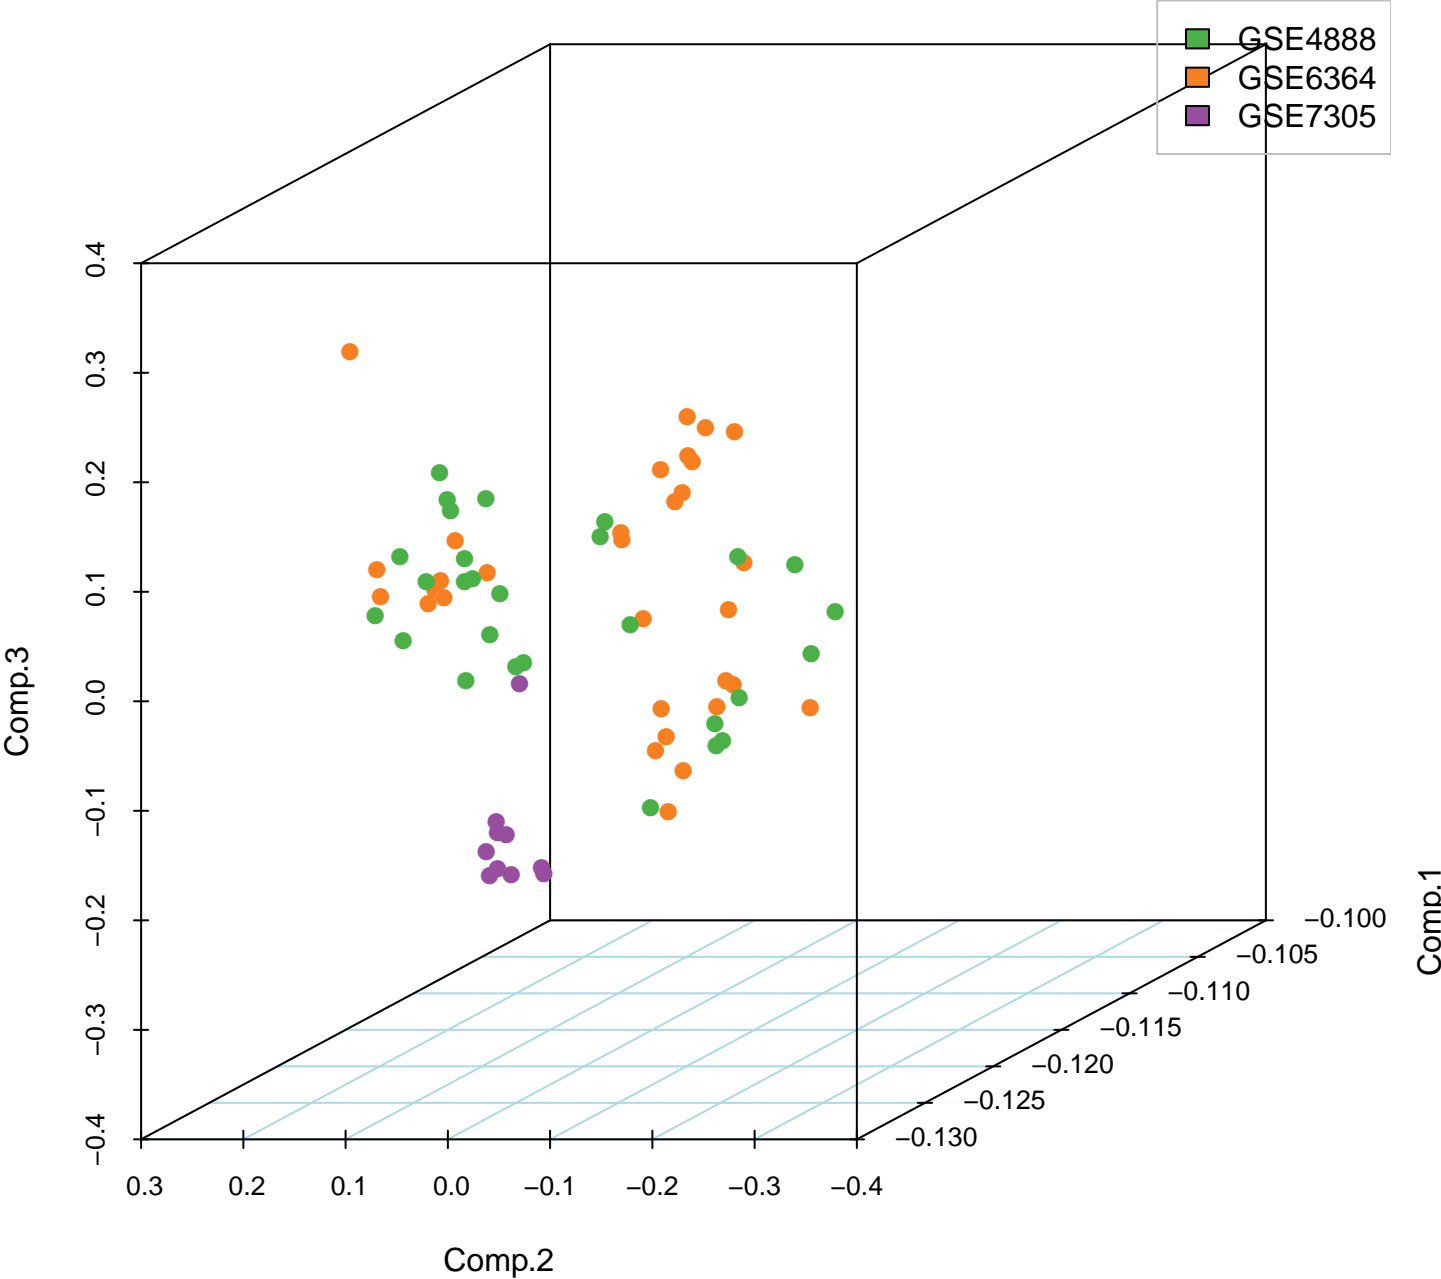

# PCA

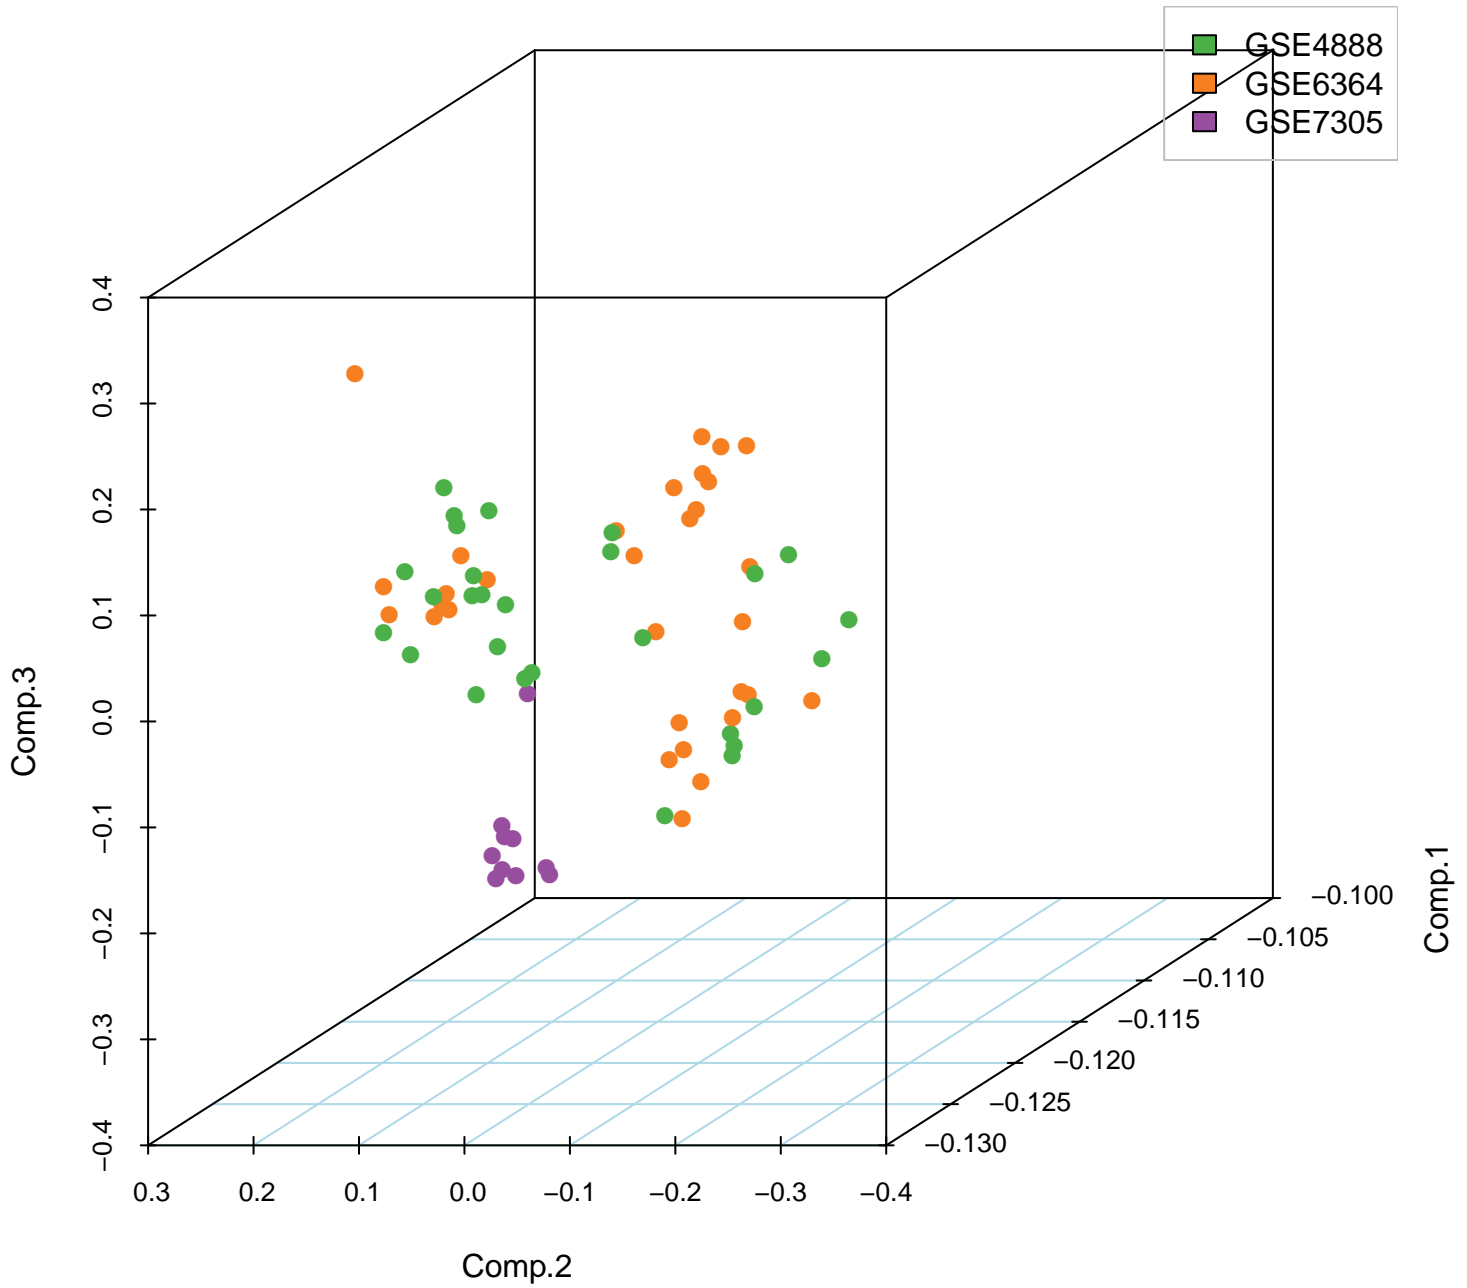

# PCA

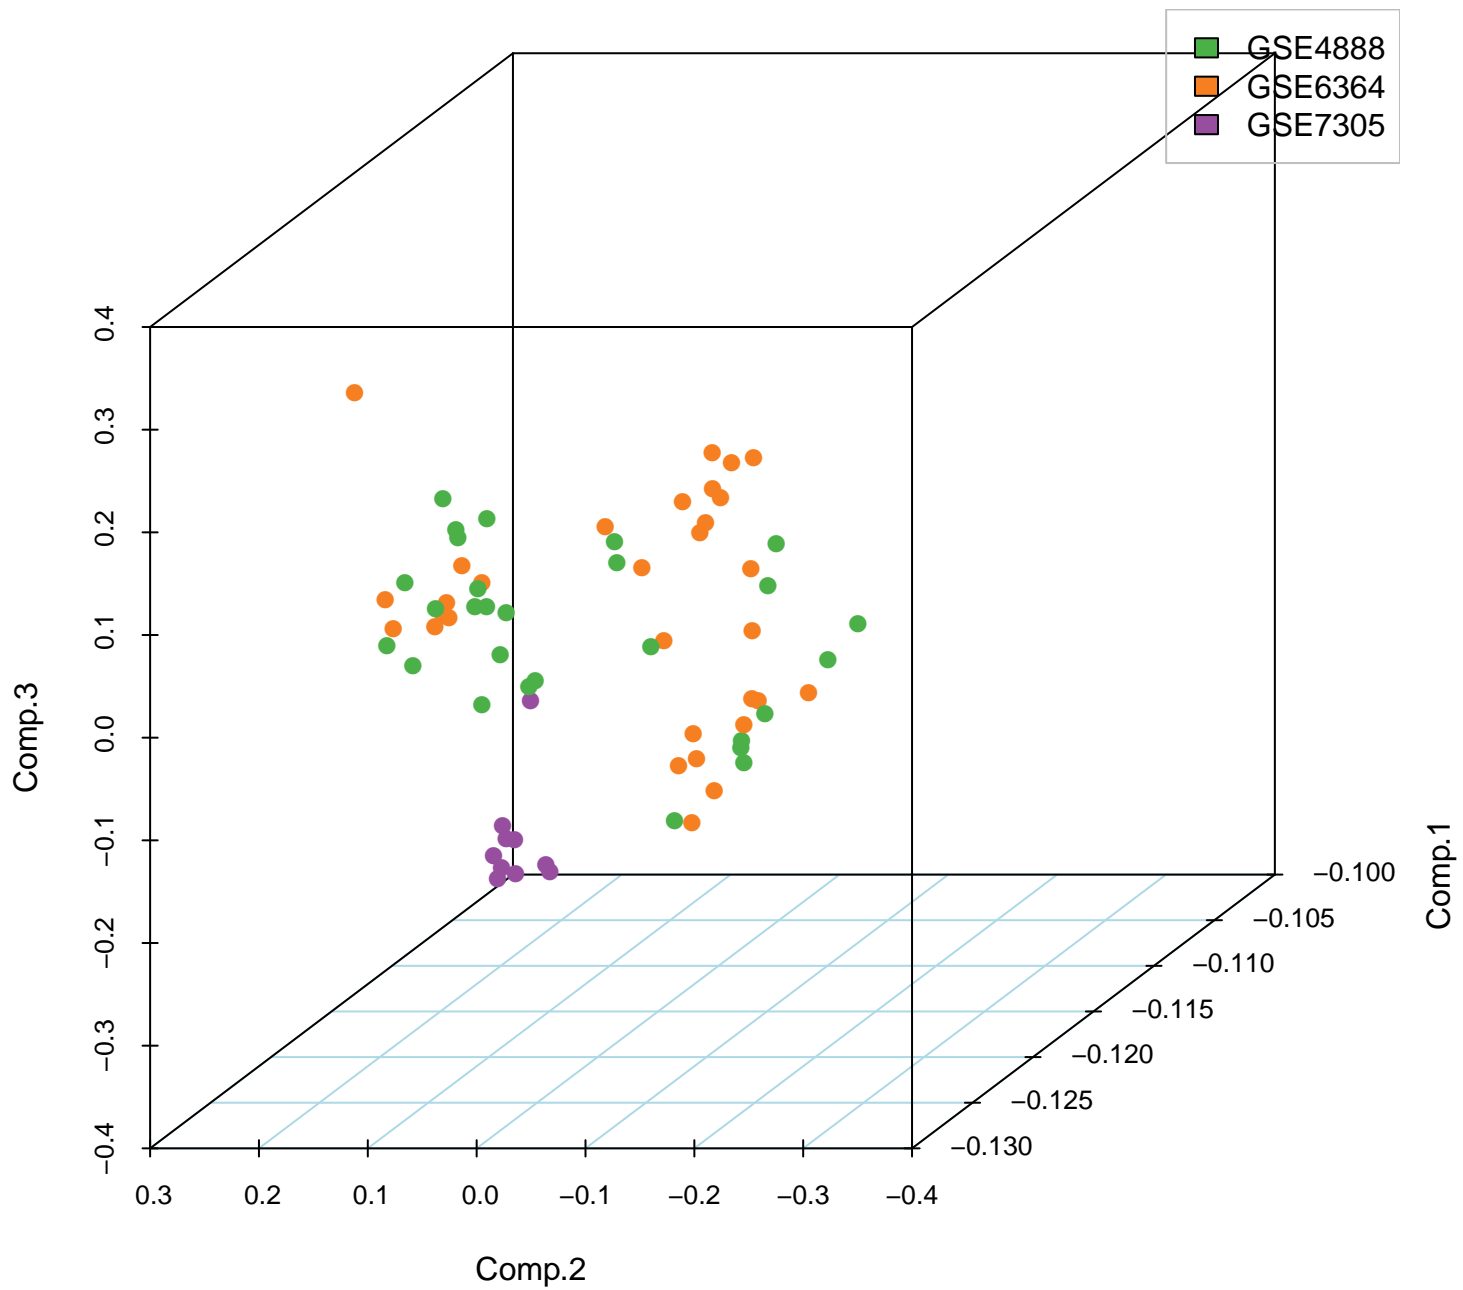

# PCA

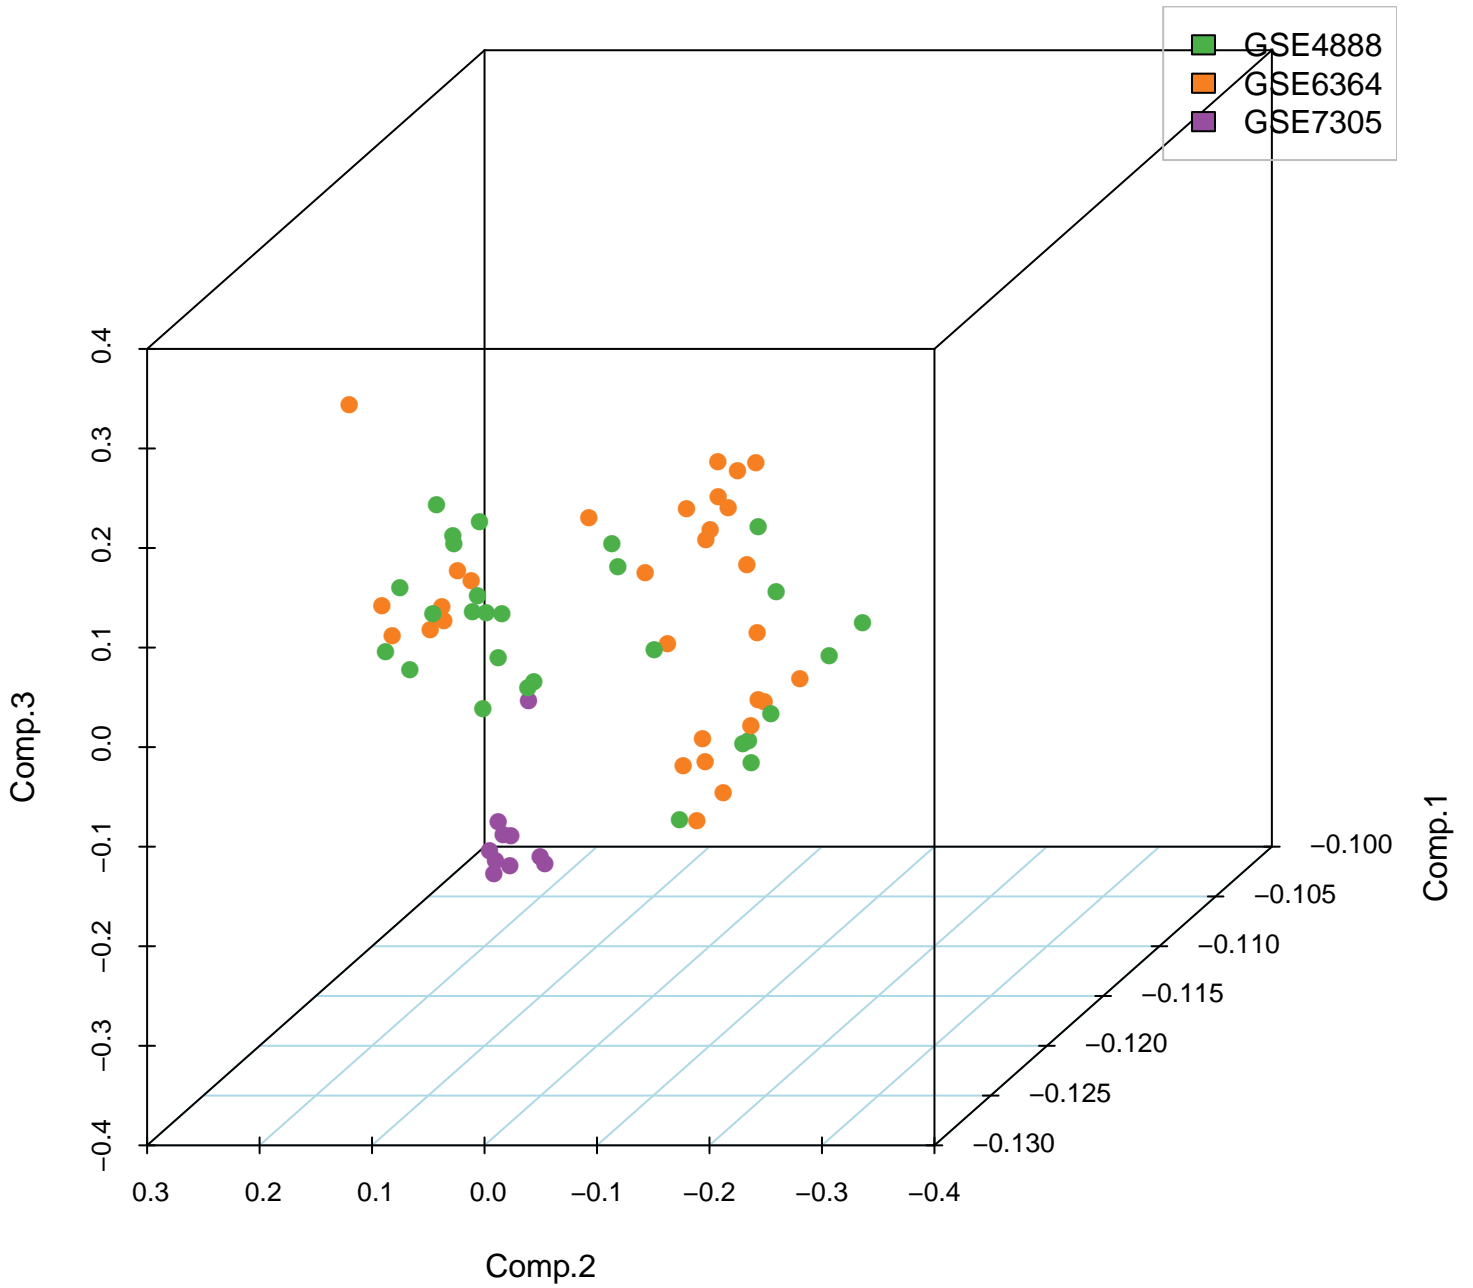

# PCA

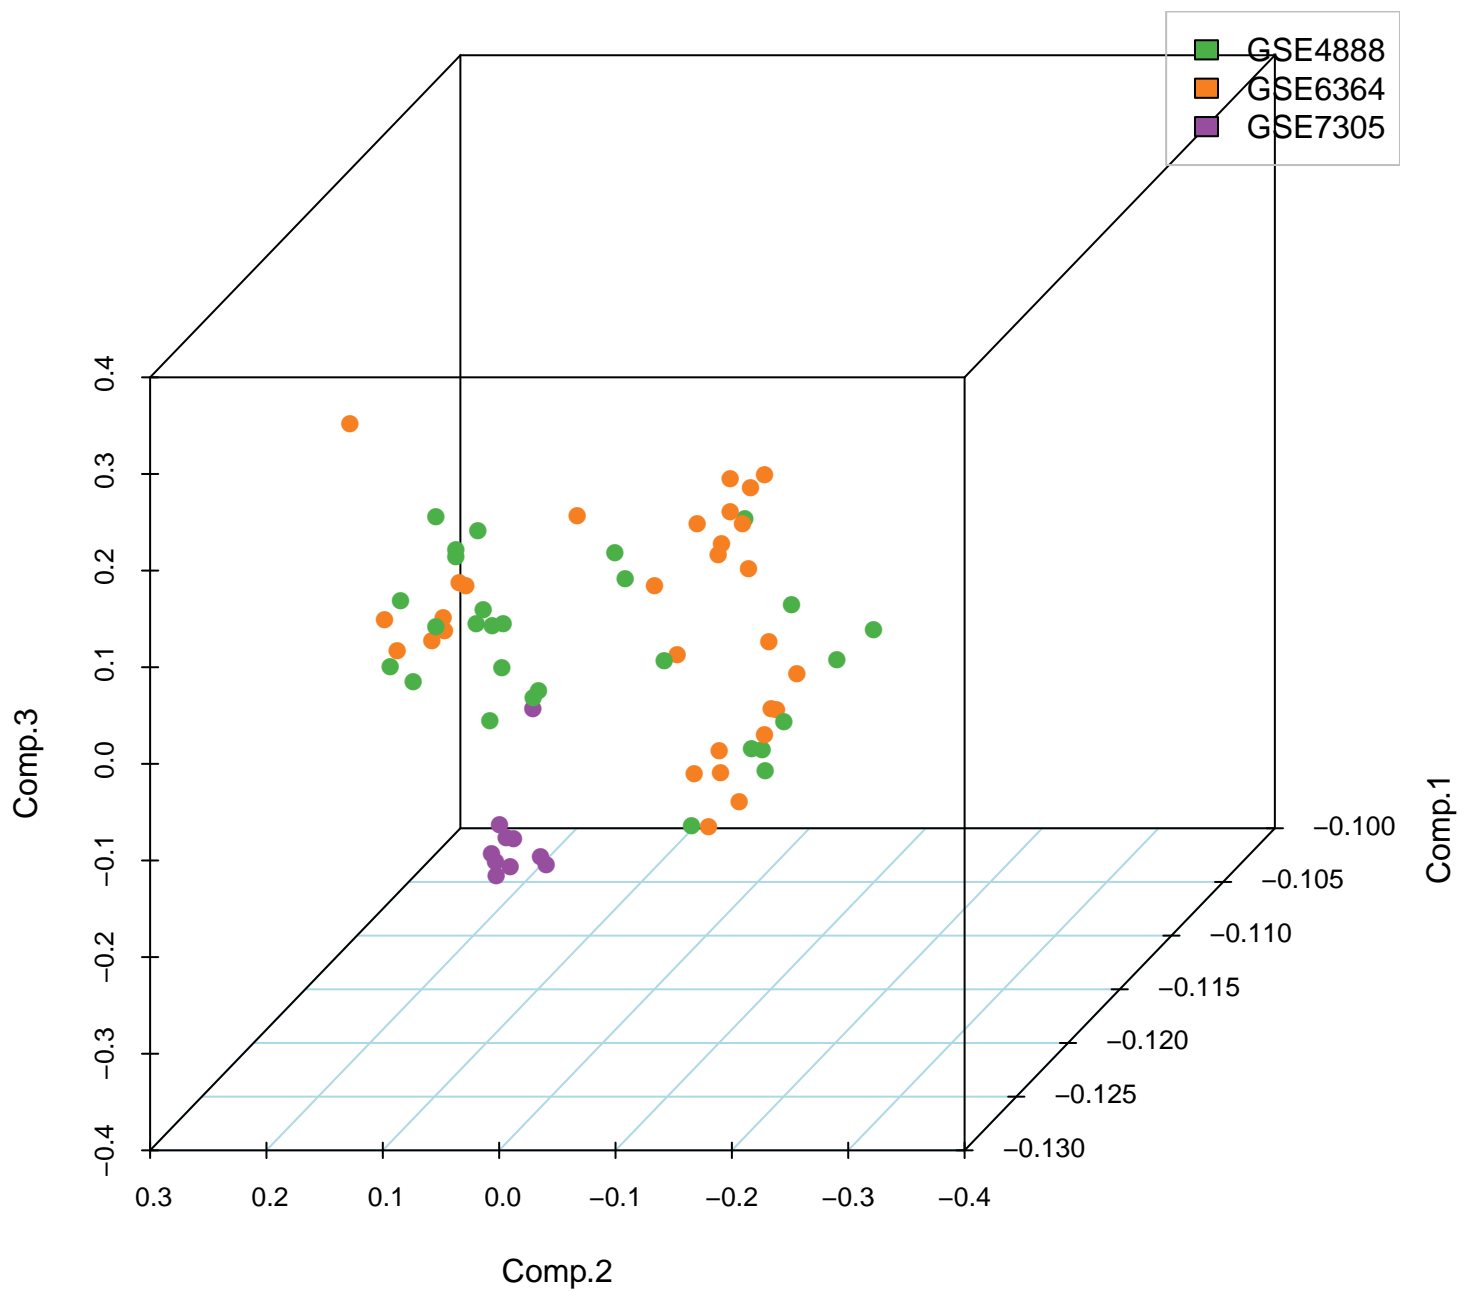

# PCA

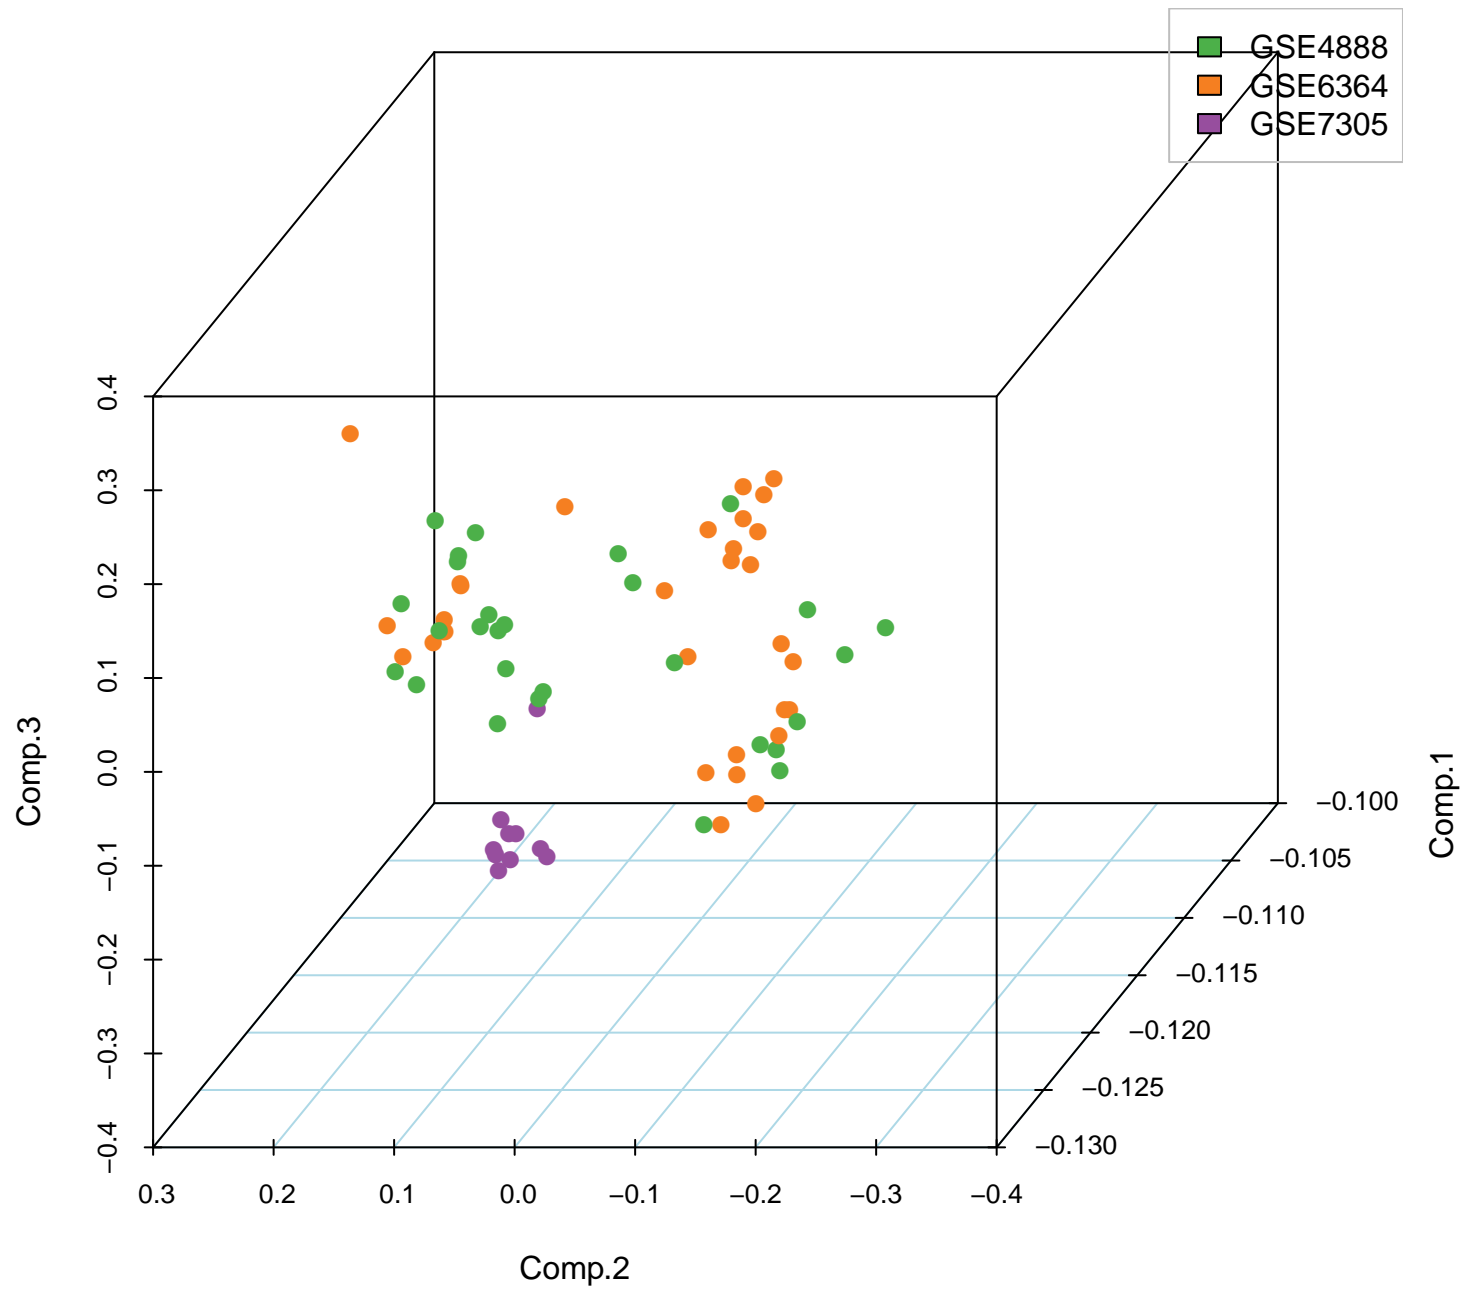





# PCA

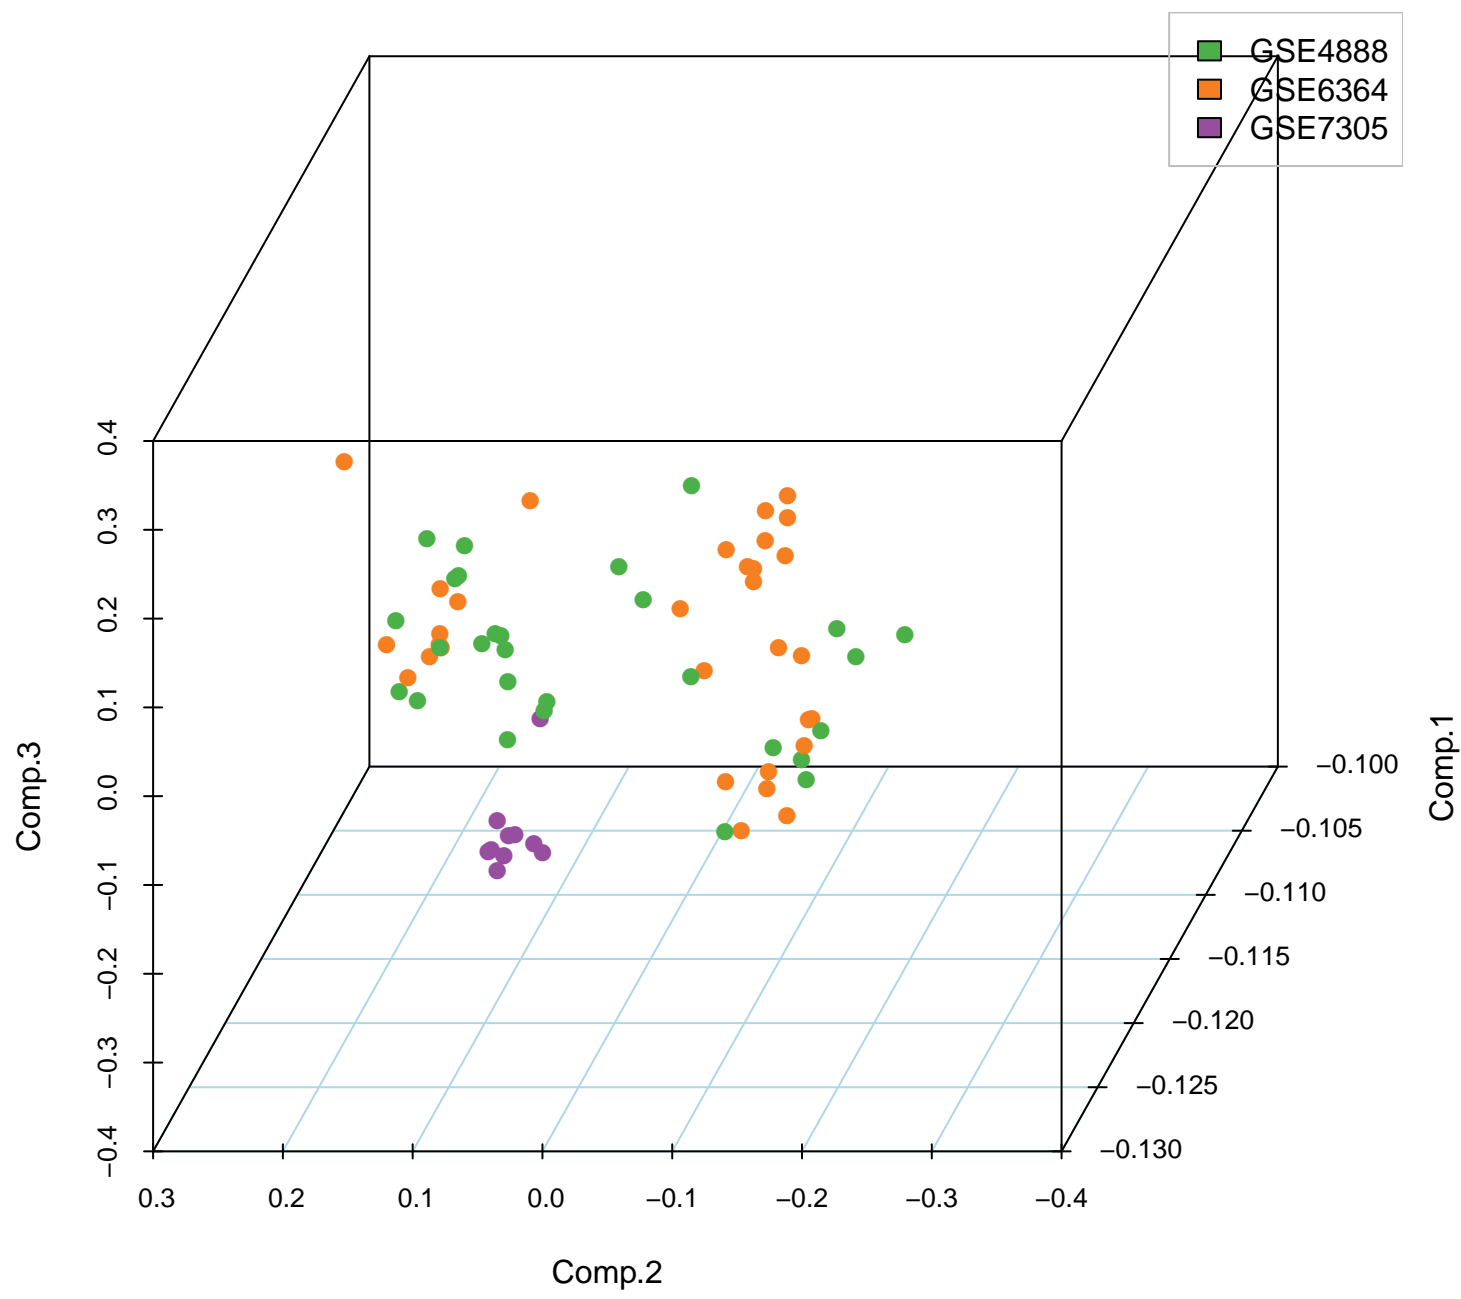

# PCA

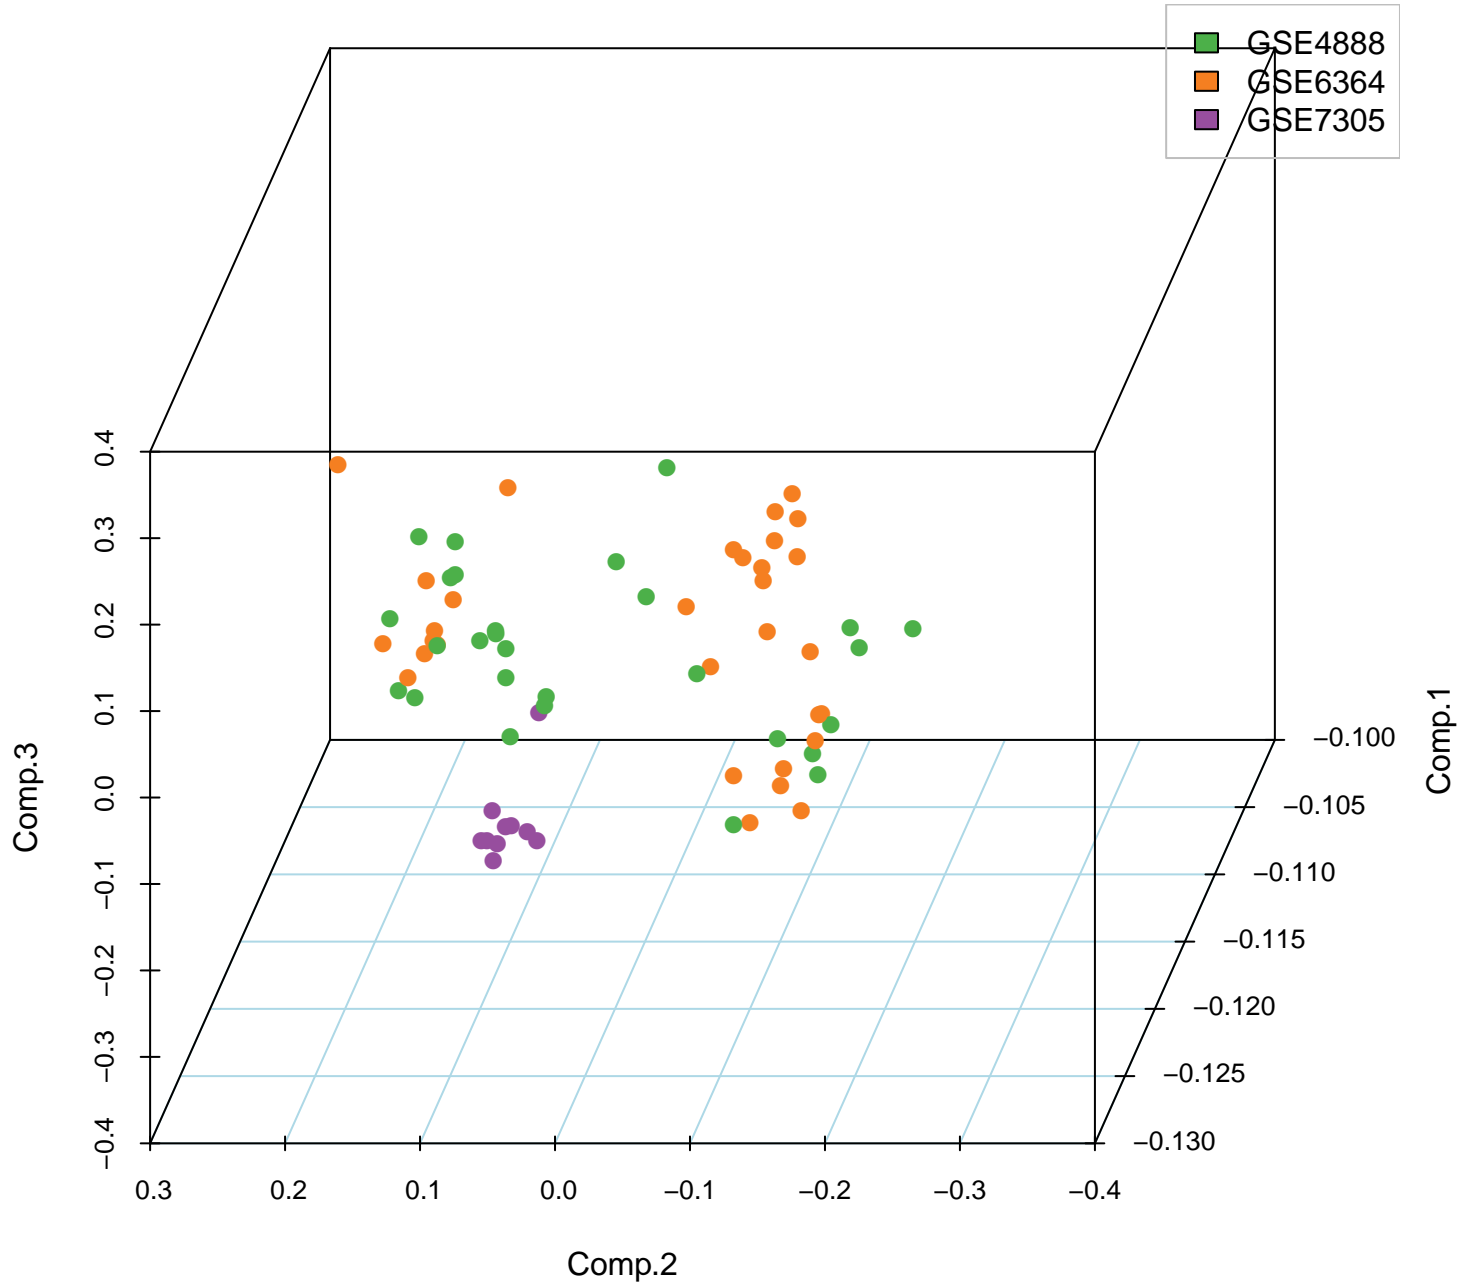

# PCA

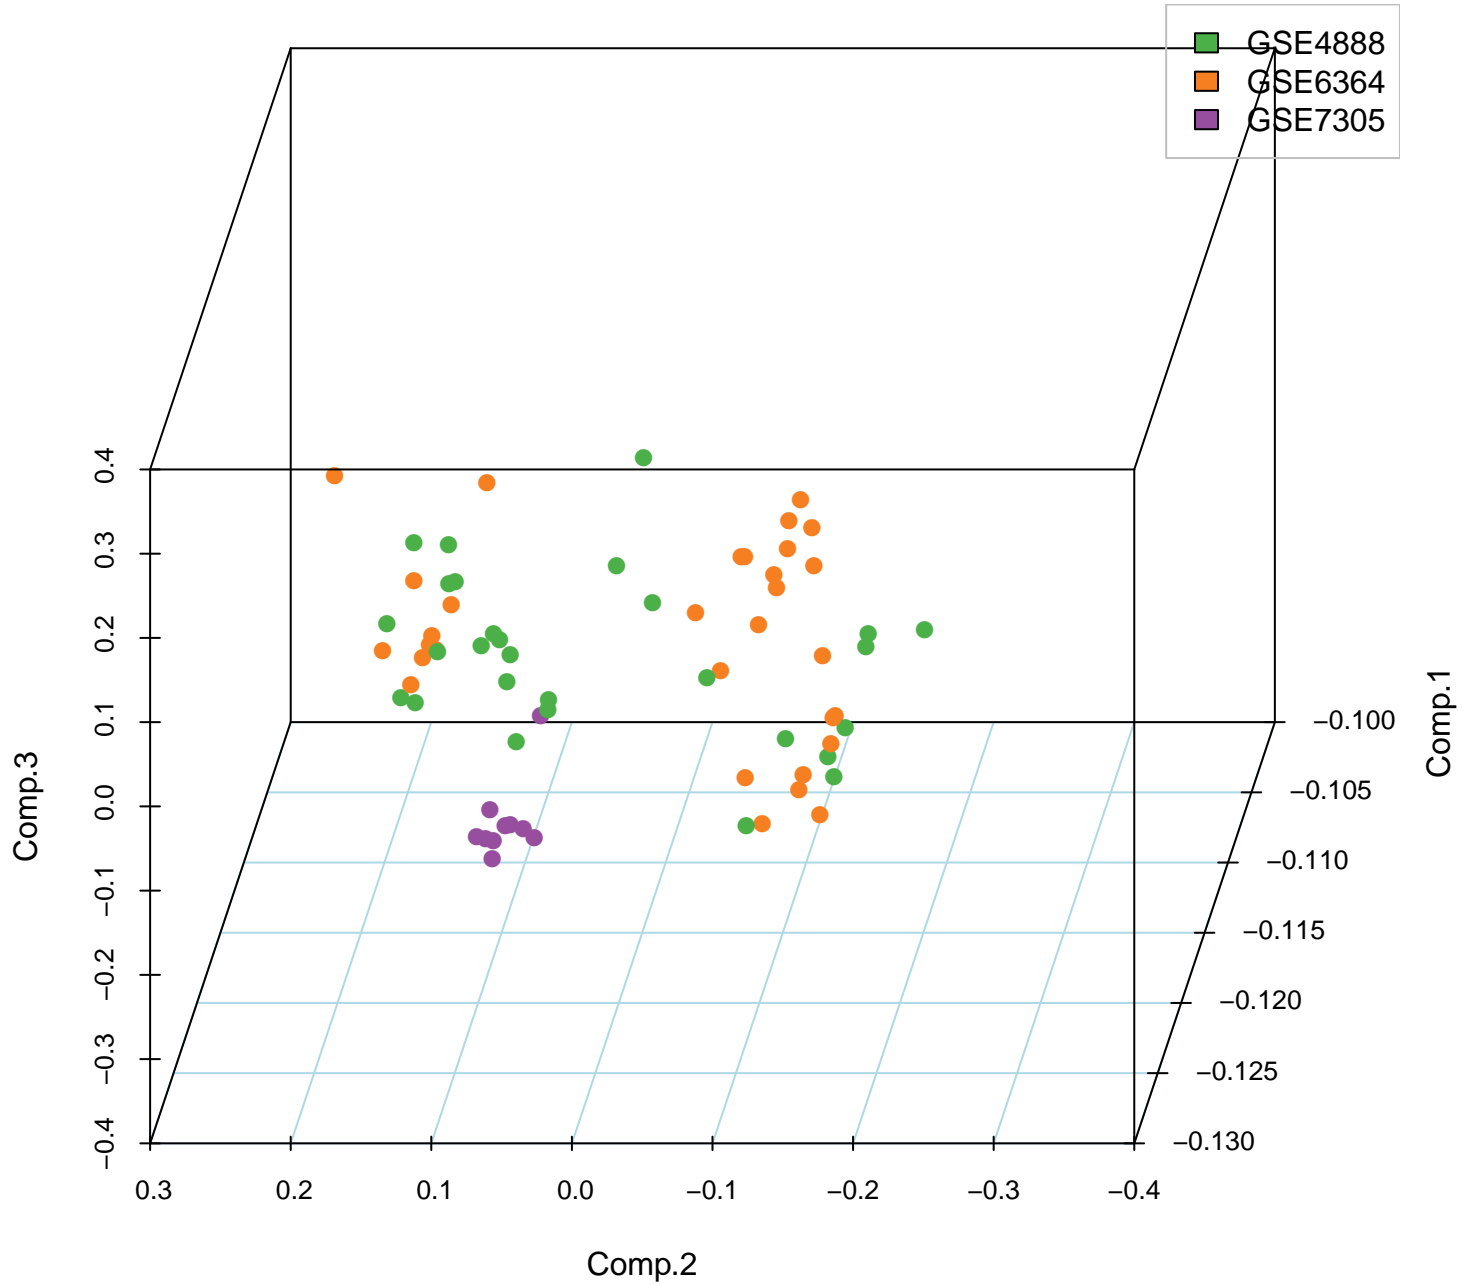

# PCA

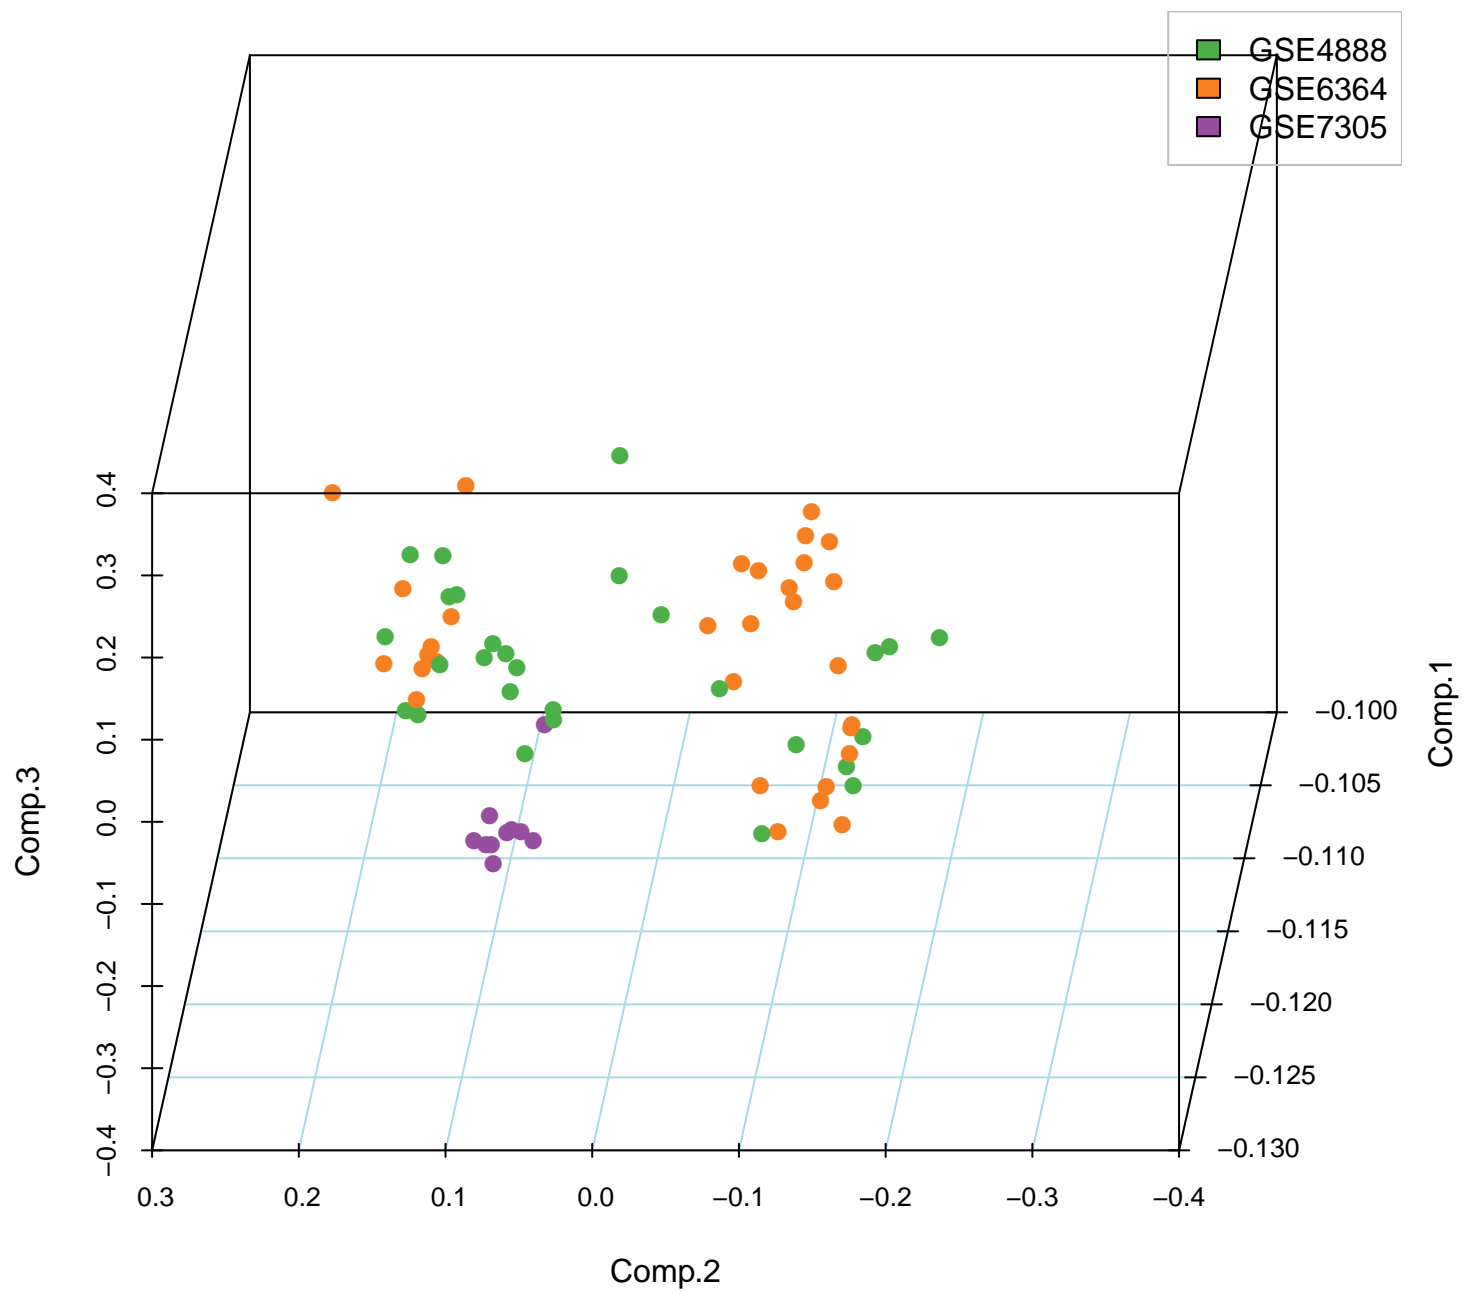

# PCA

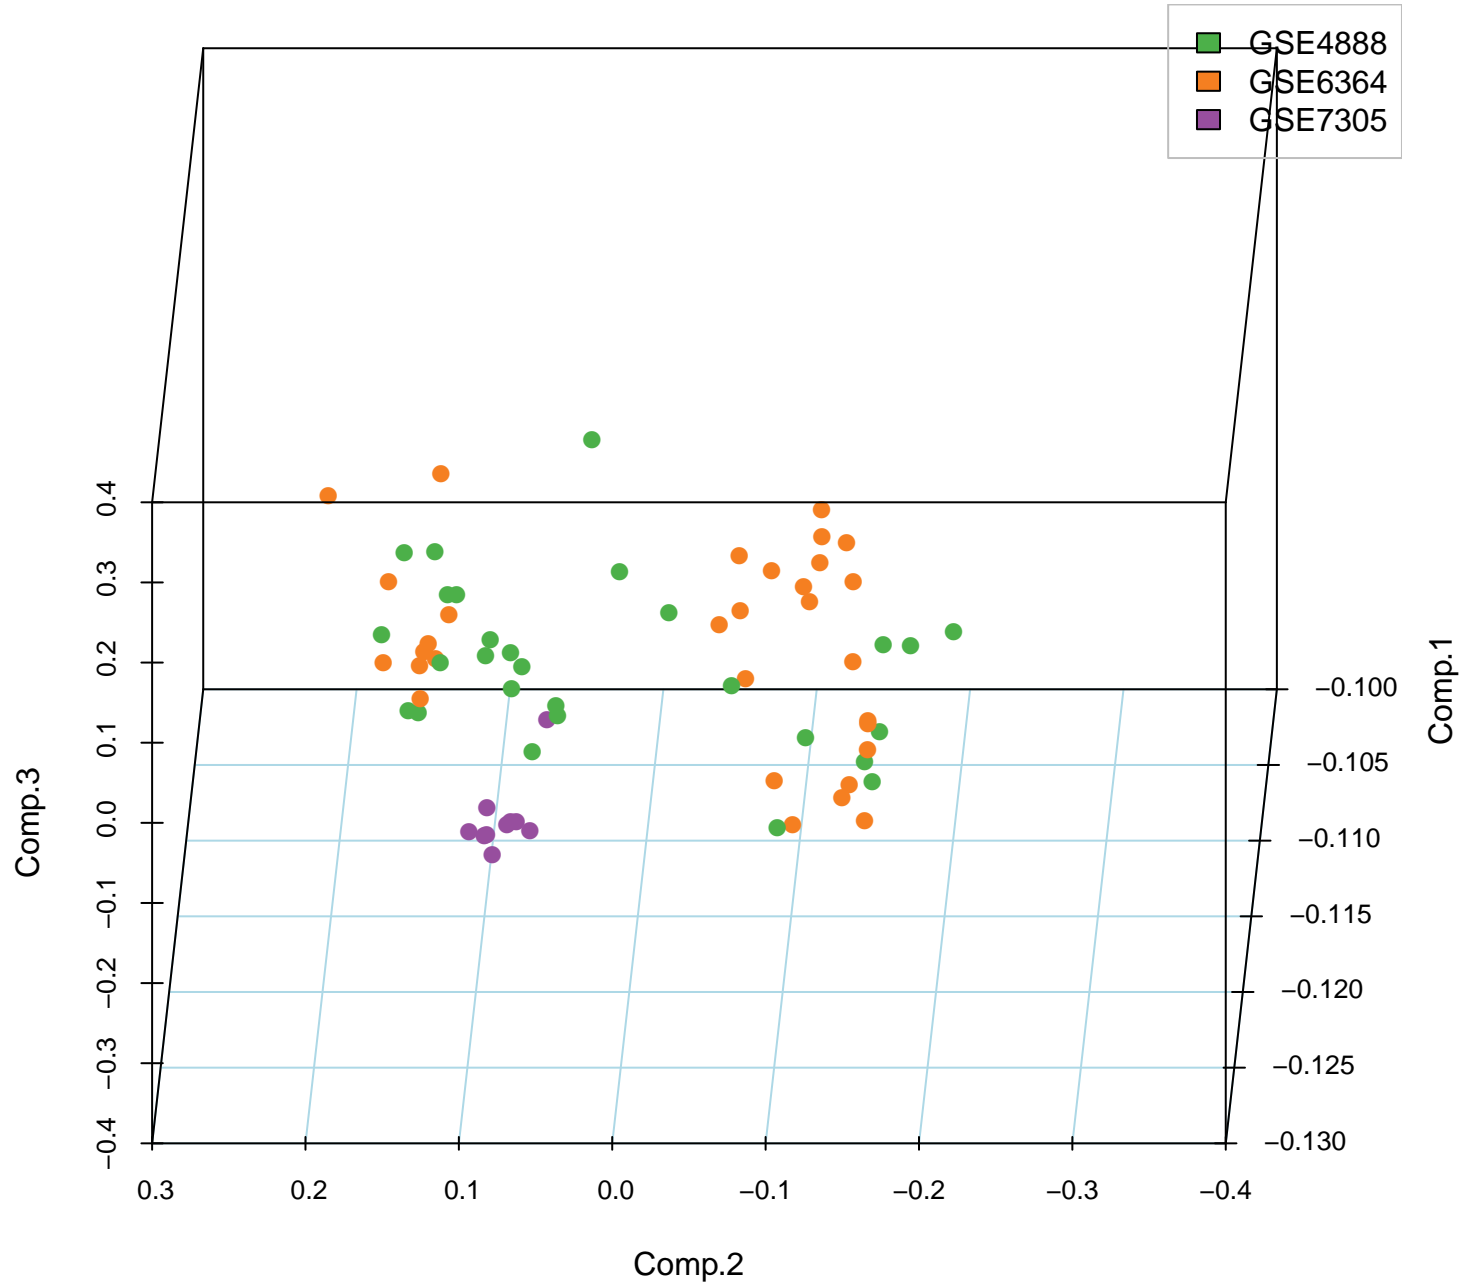

# PCA

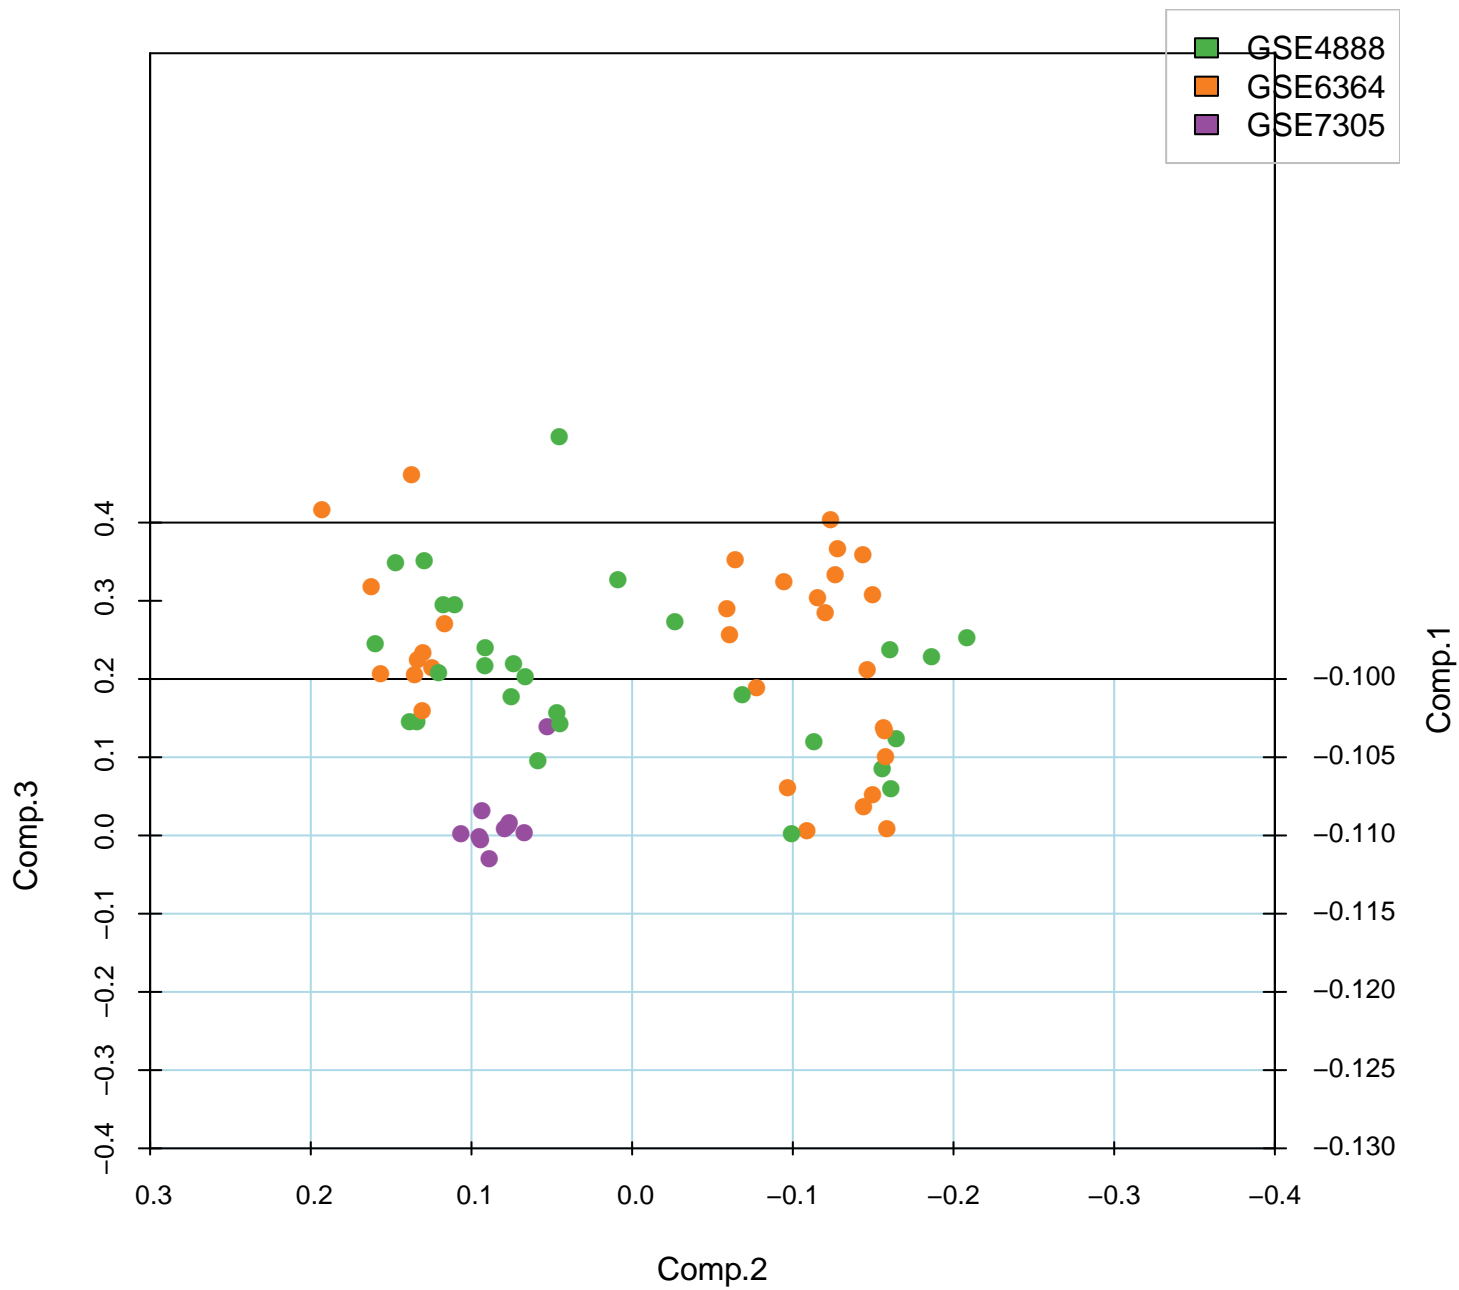

# PCA

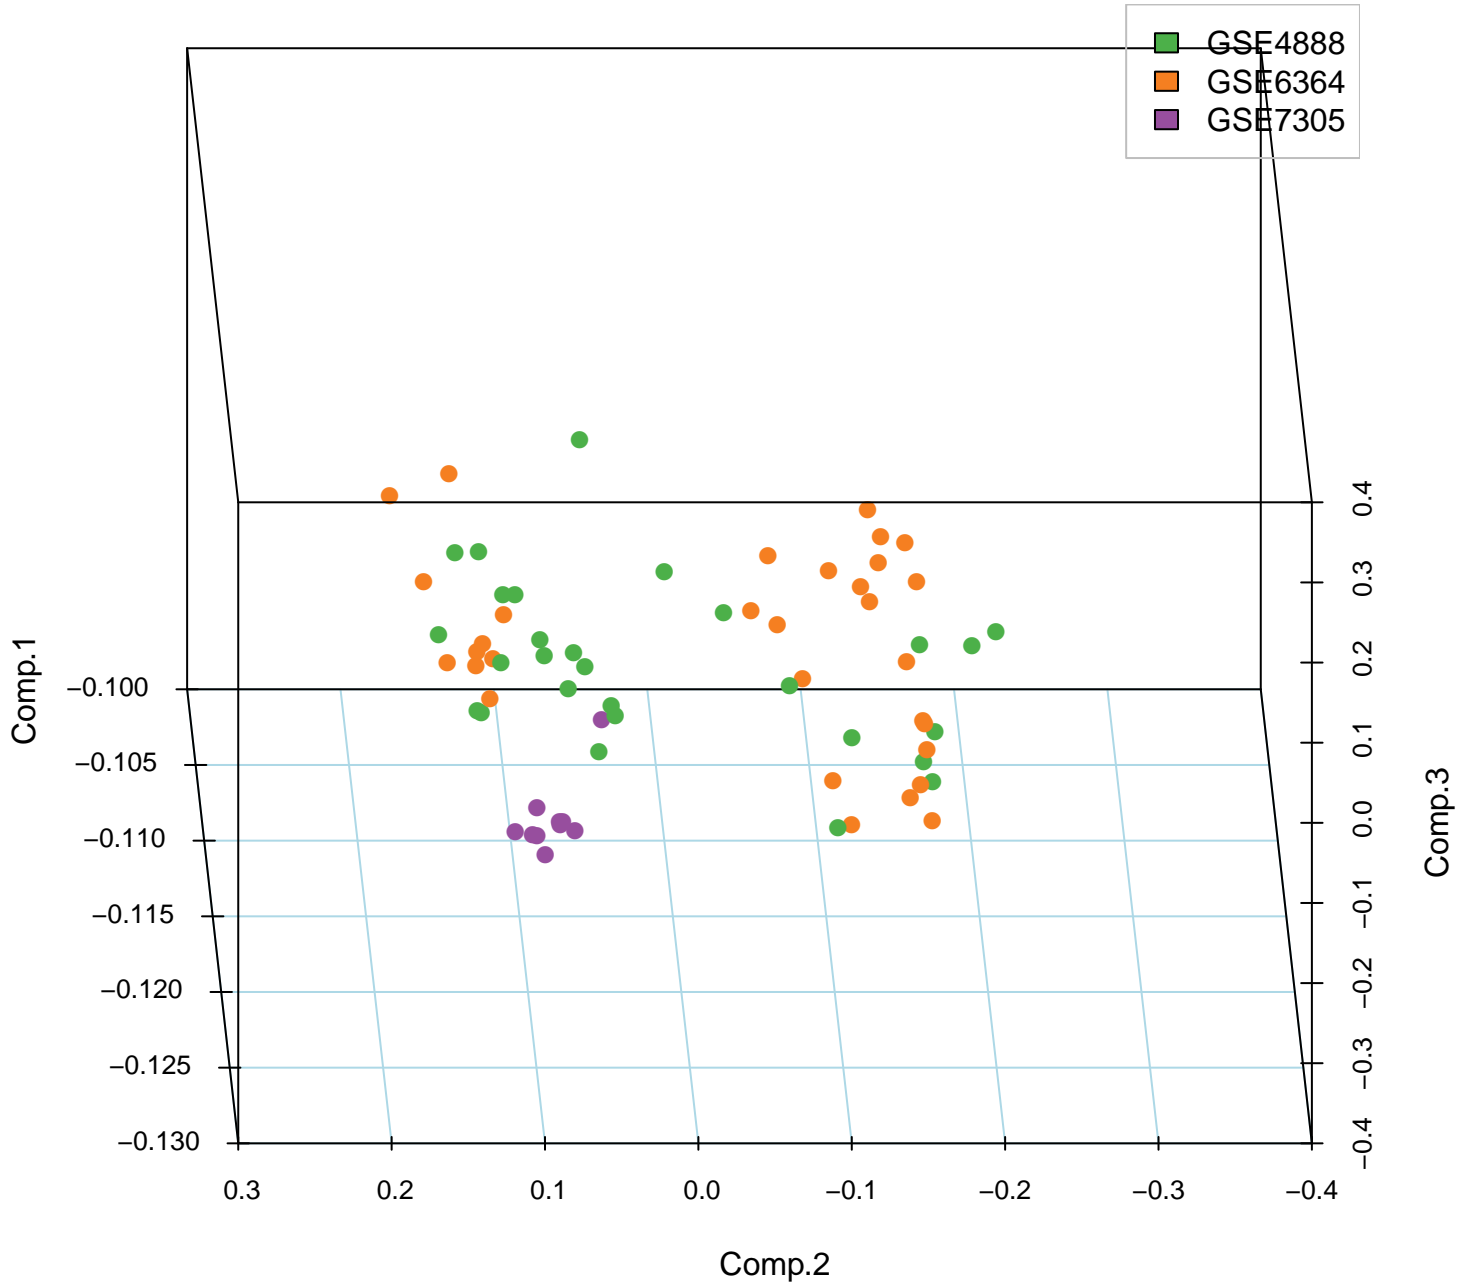



# PCA

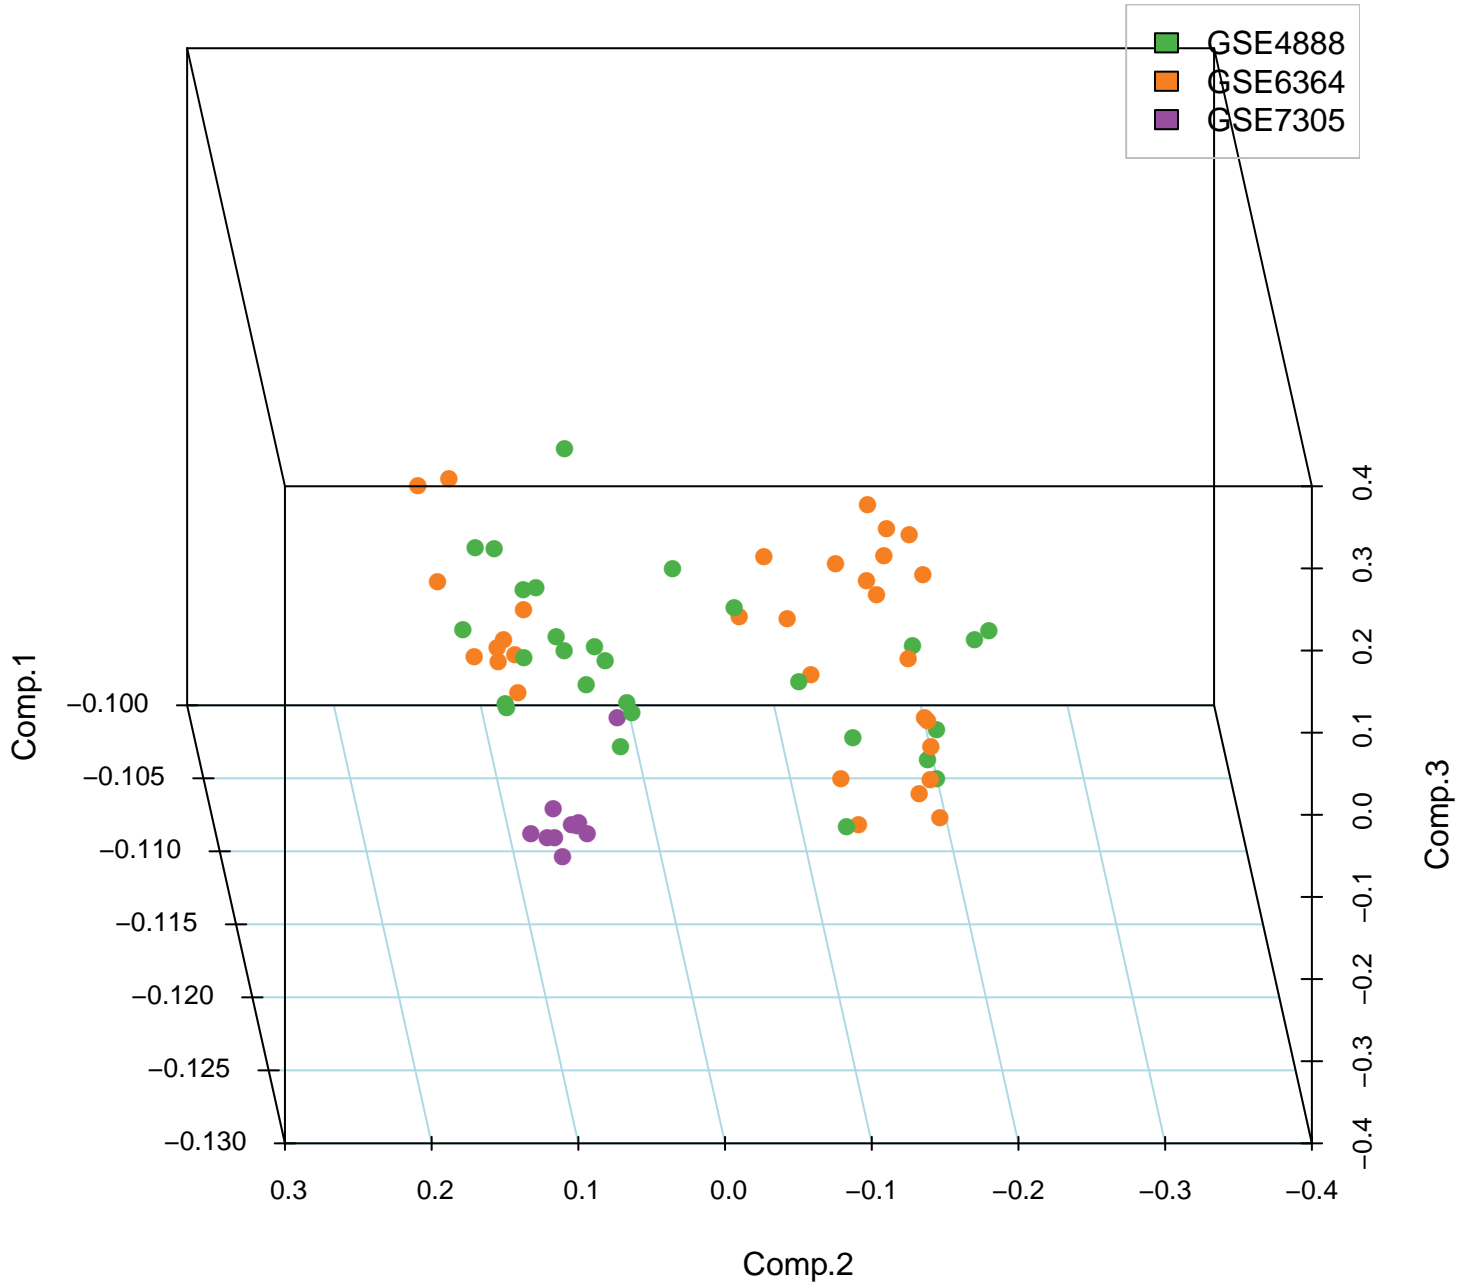

# PCA

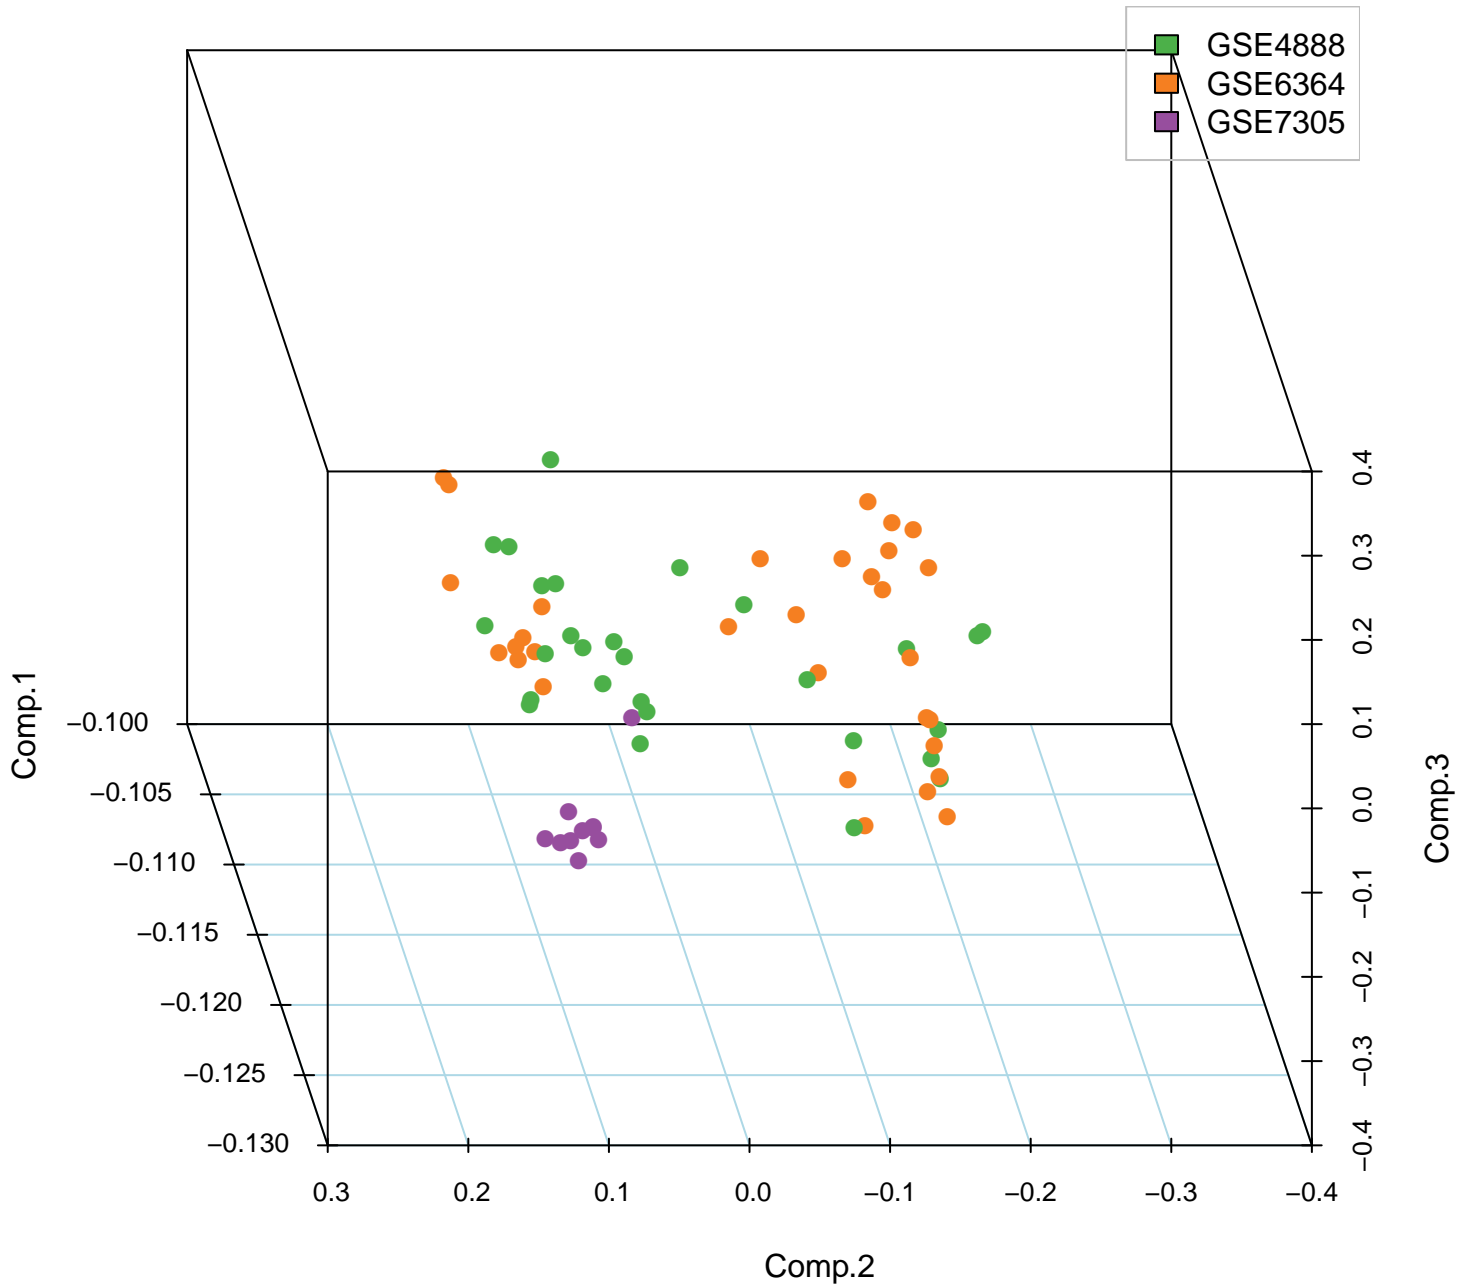

# PCA

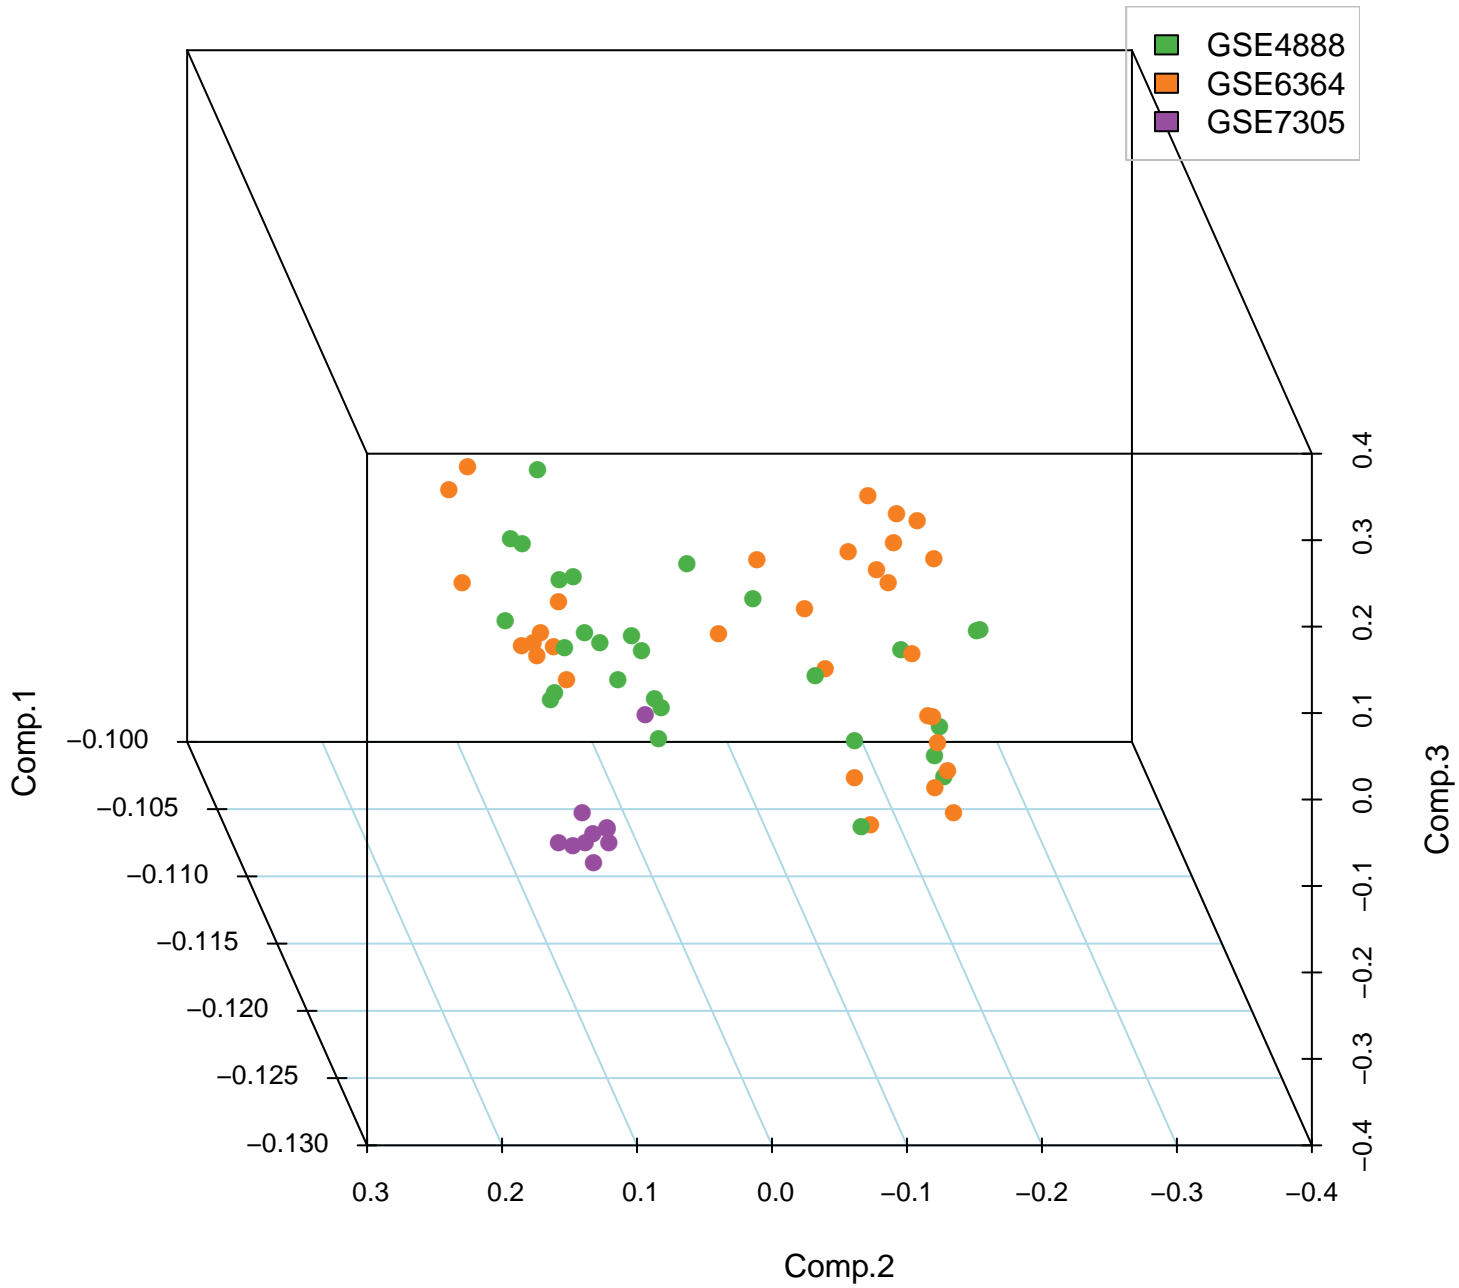

# PCA

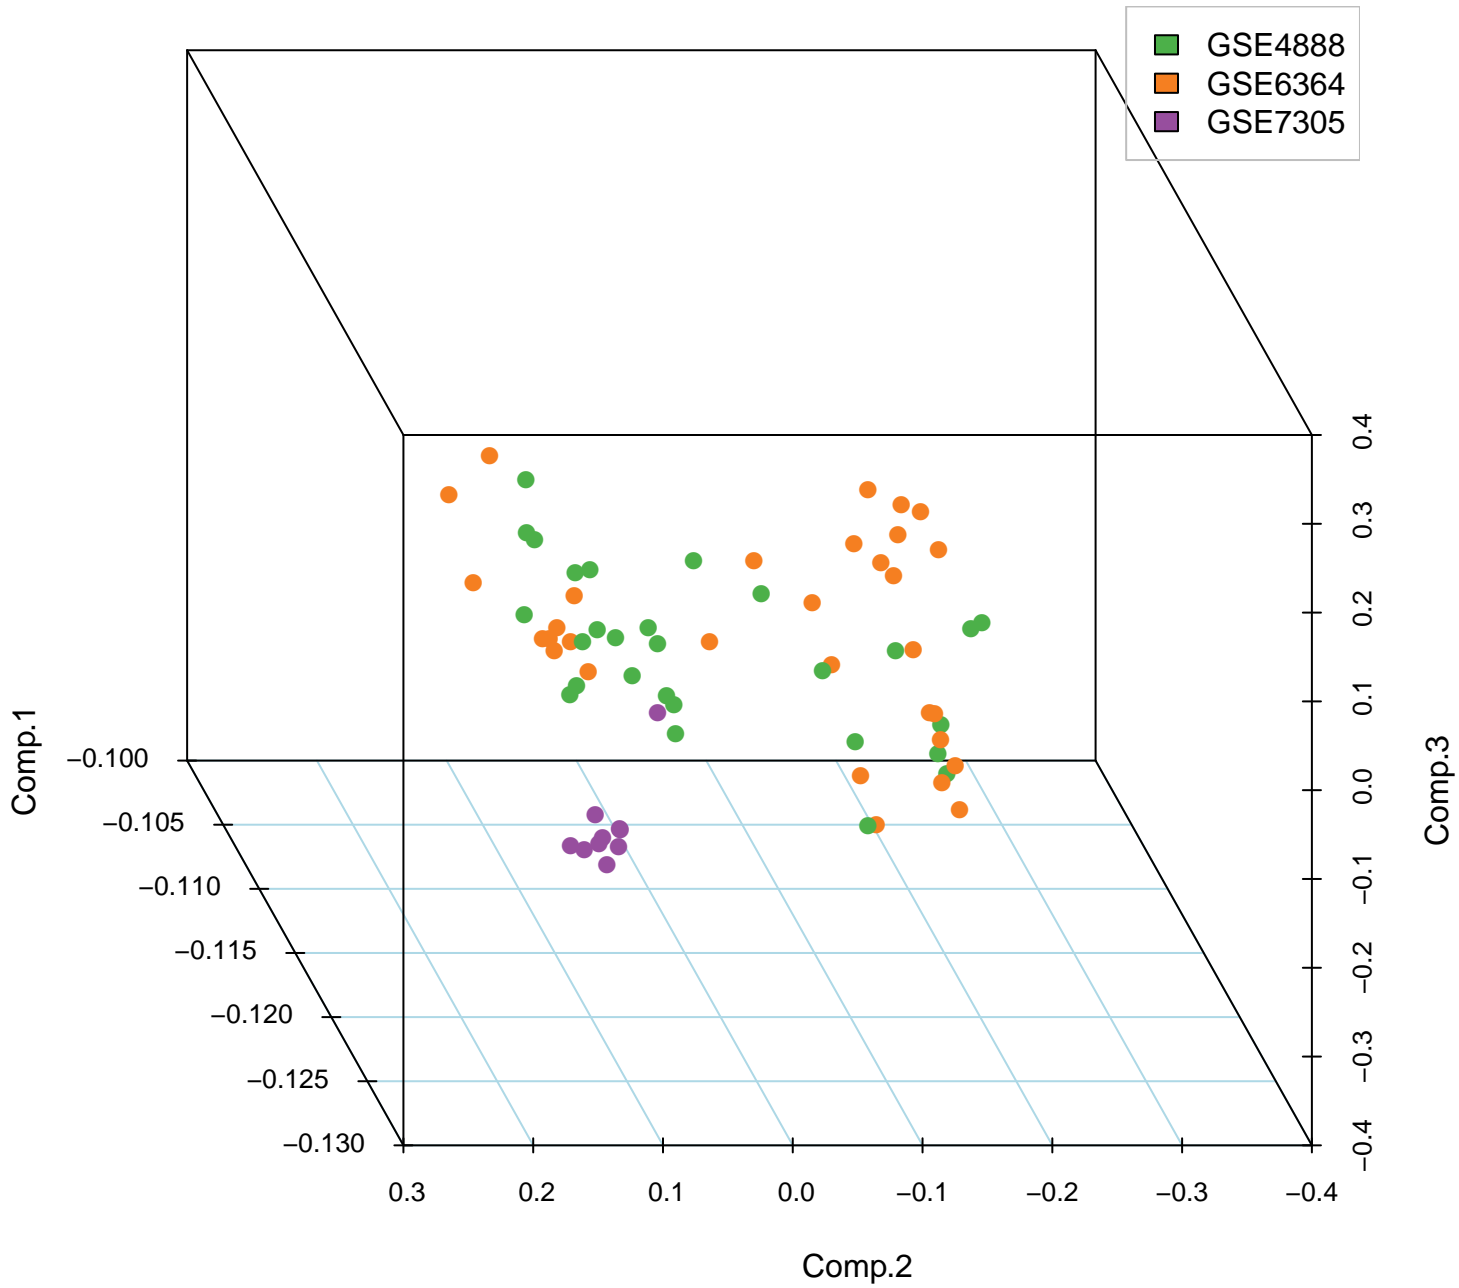

# PCA

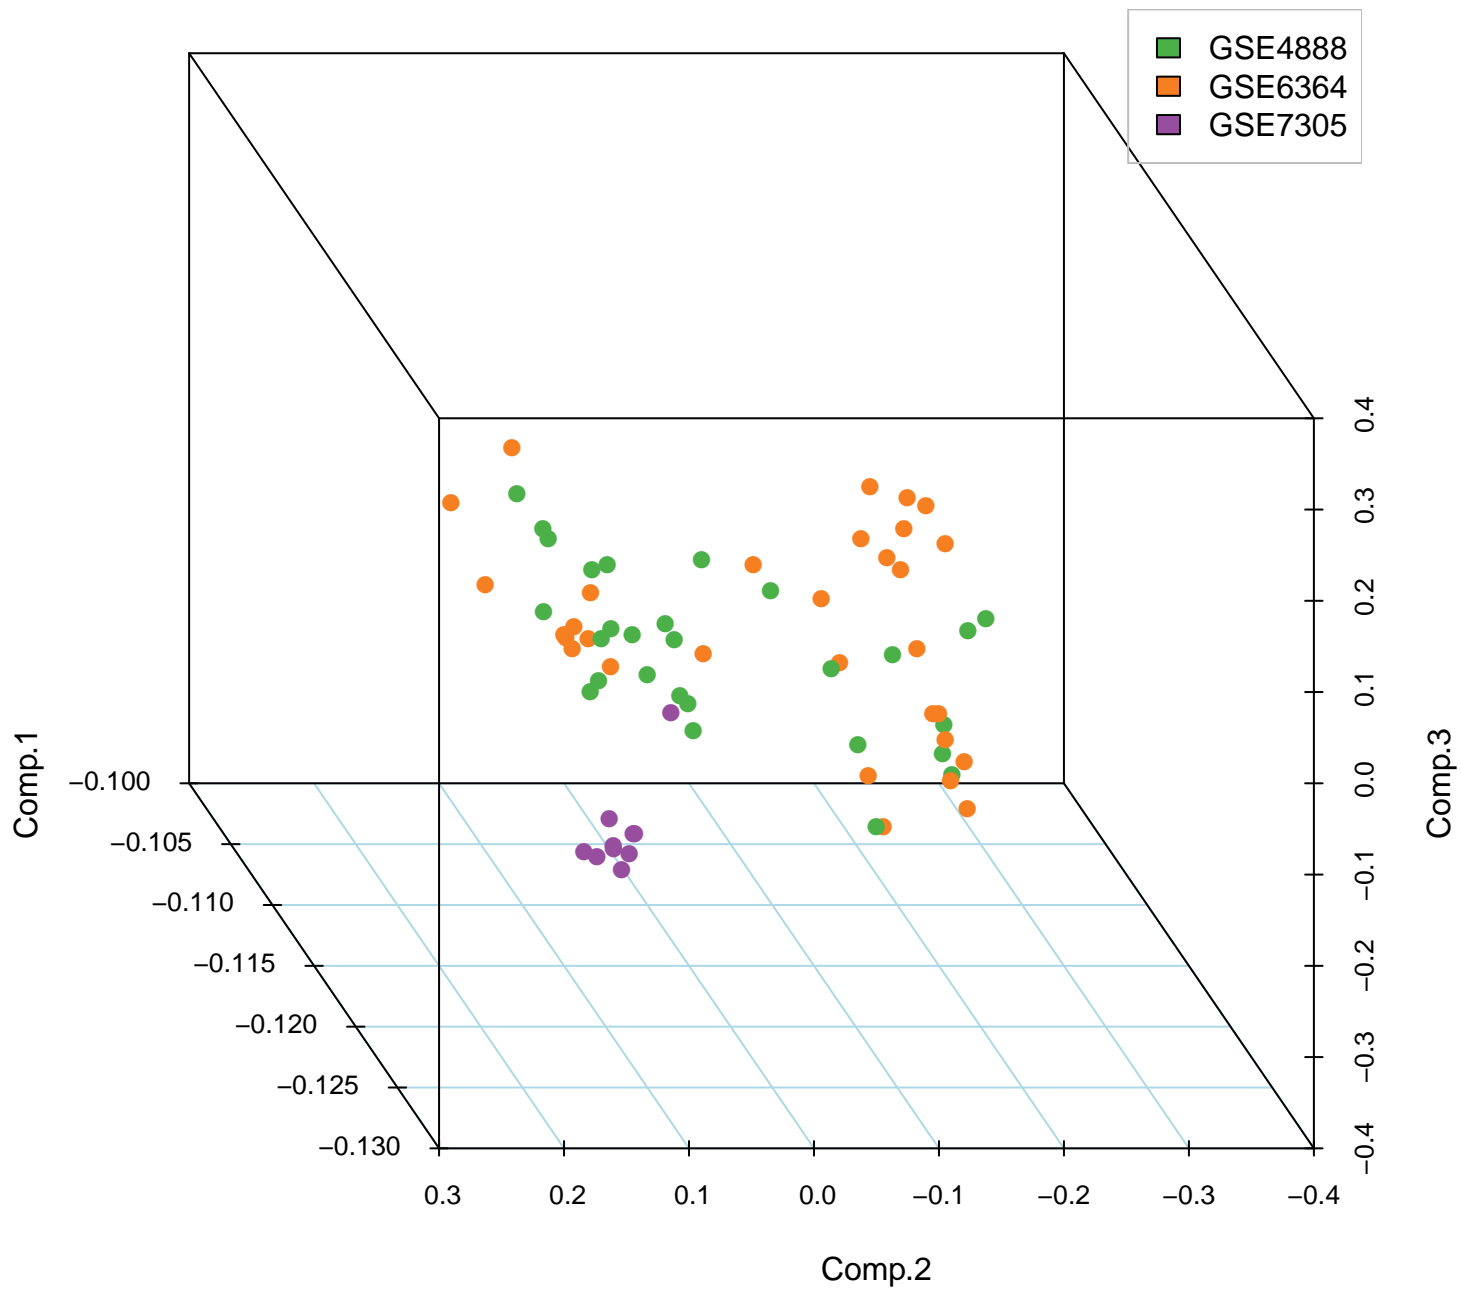

# PCA

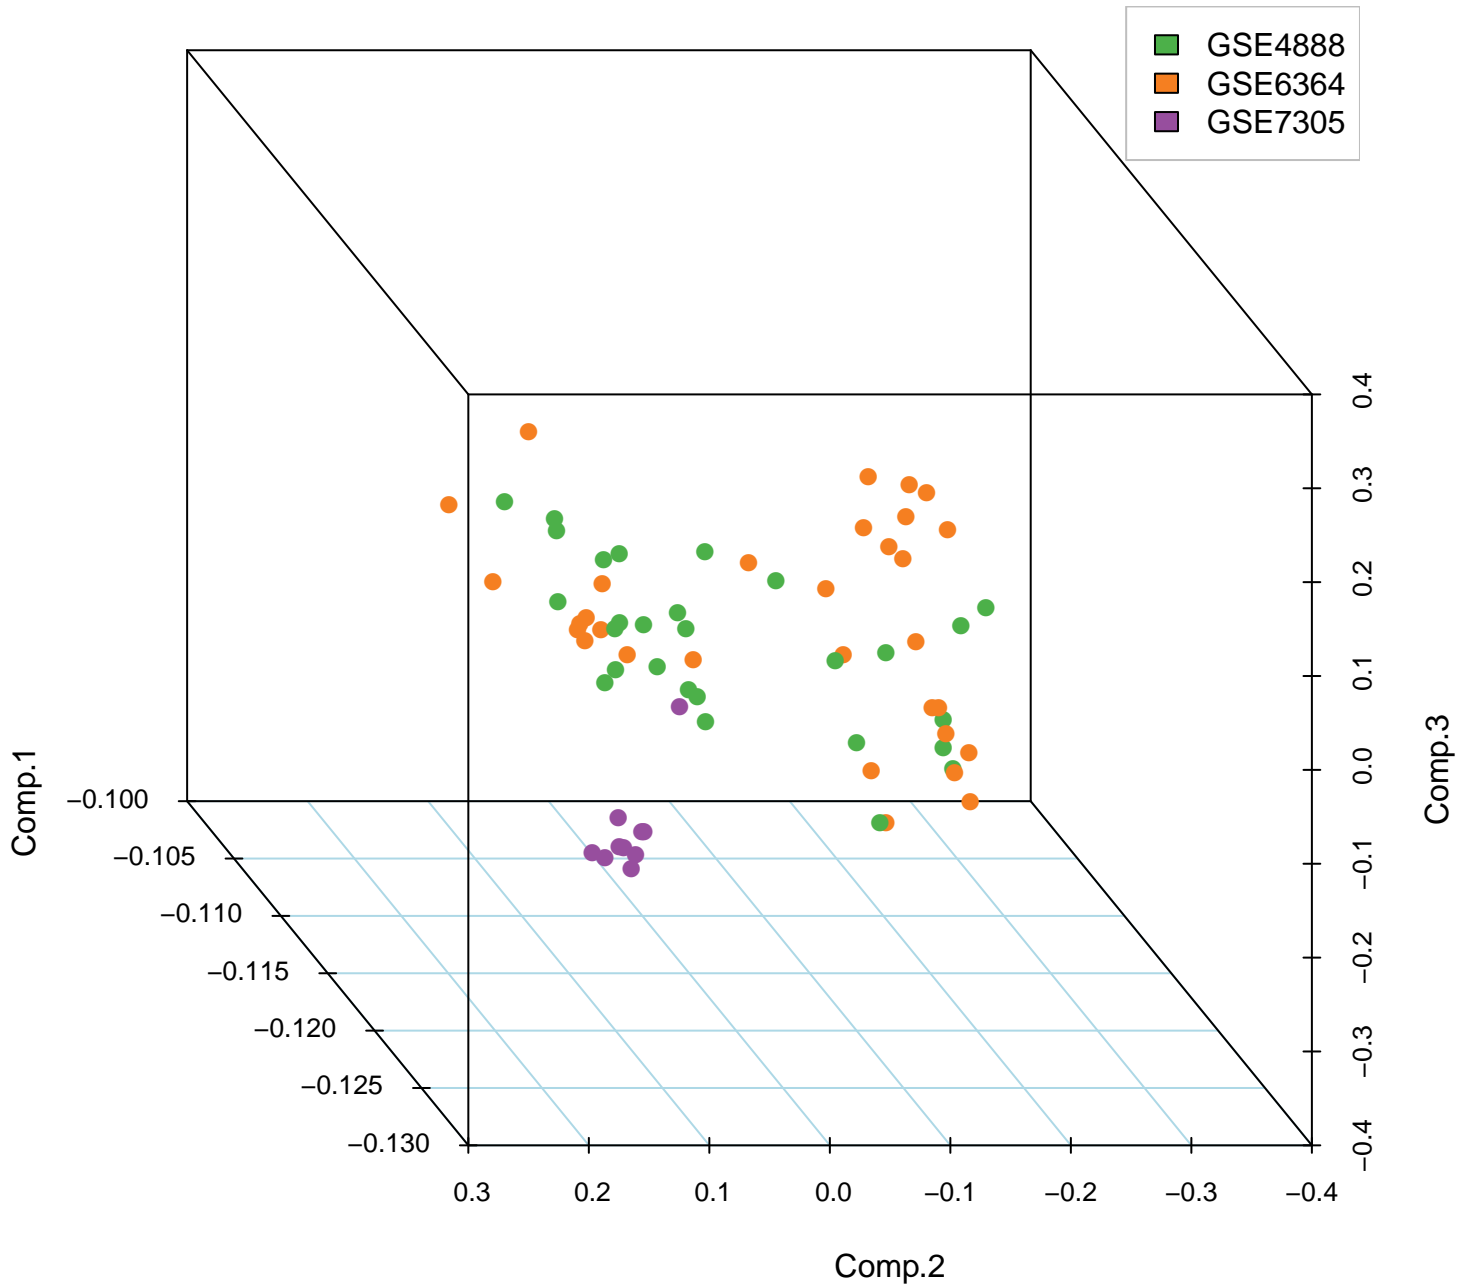

# PCA

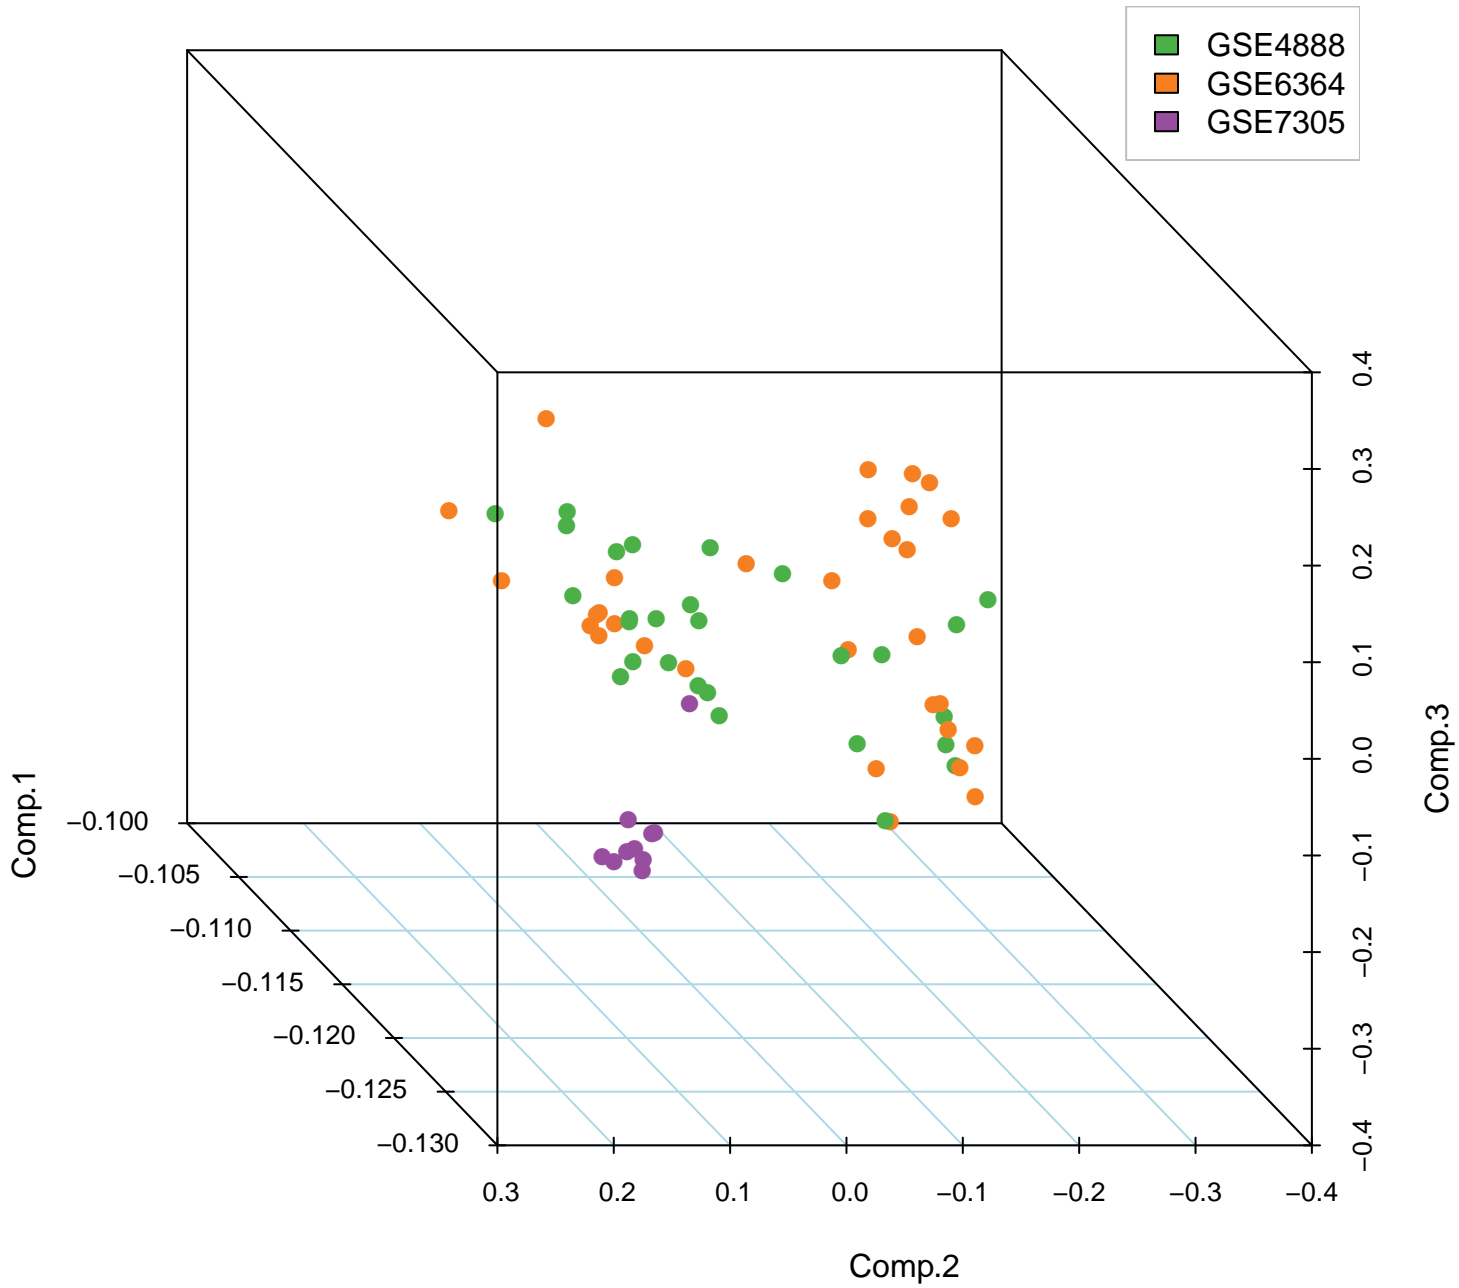

# PCA

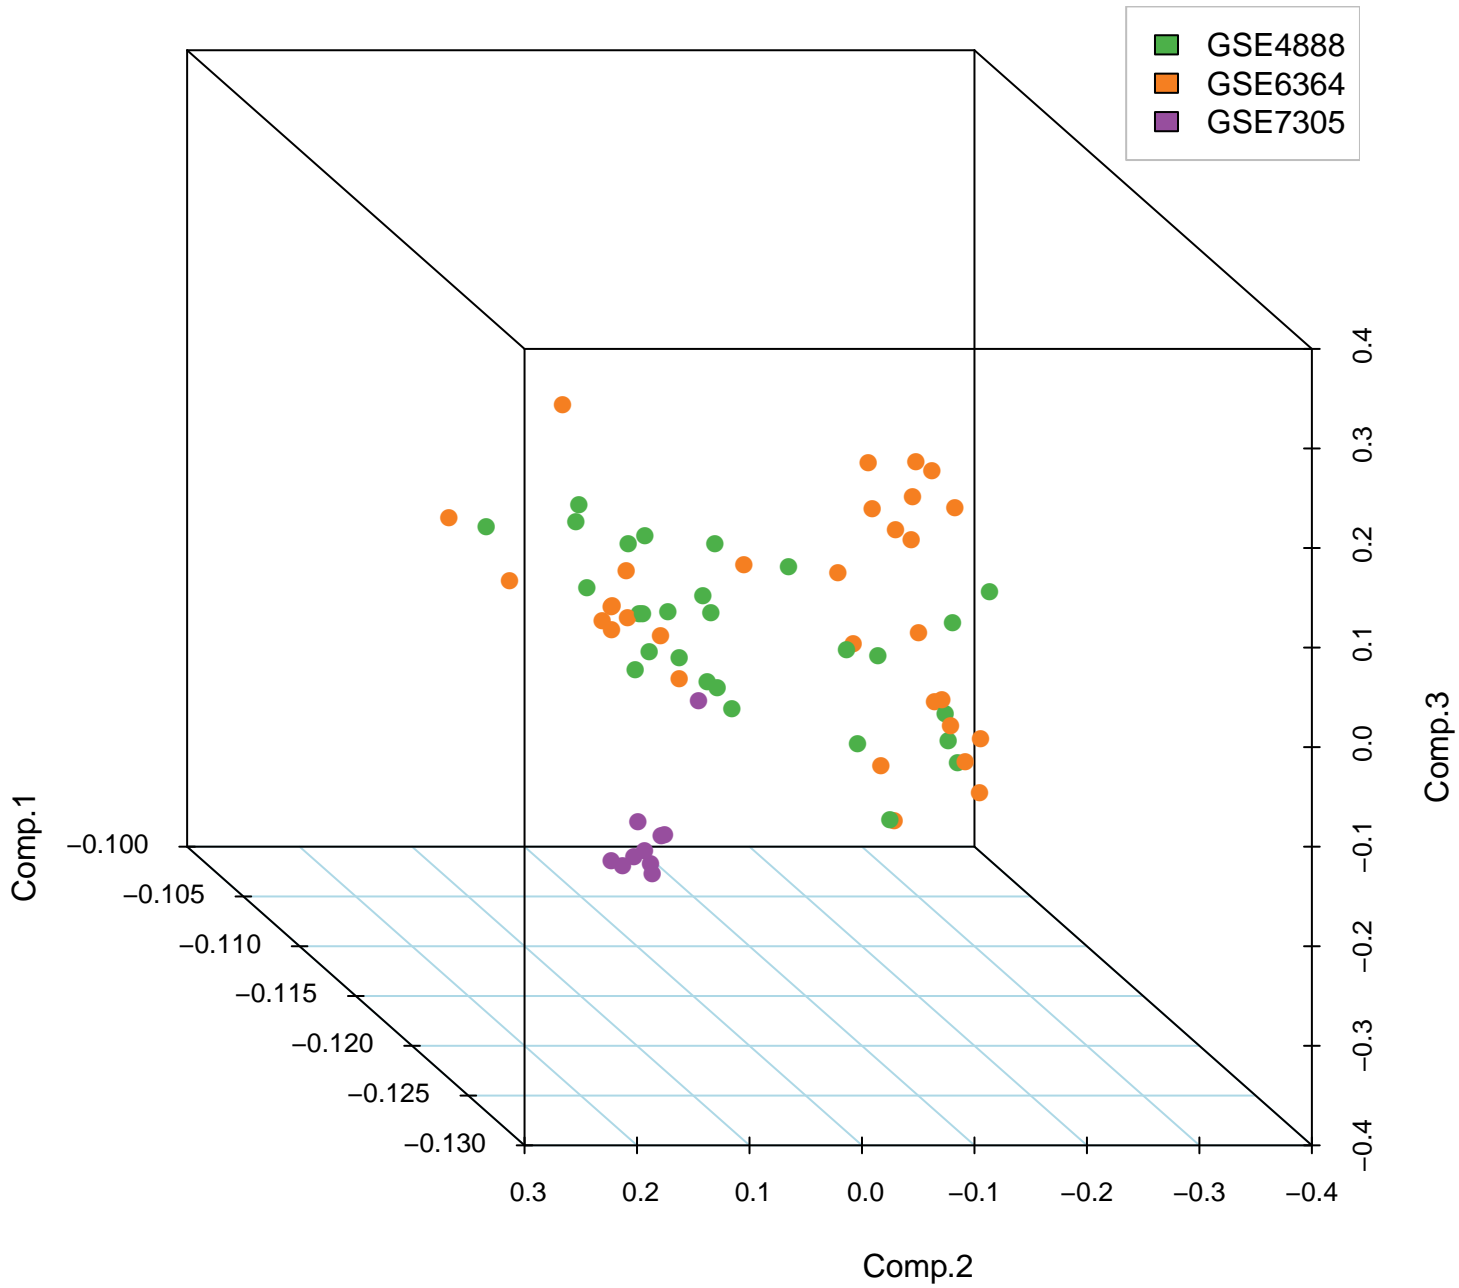



# PCA

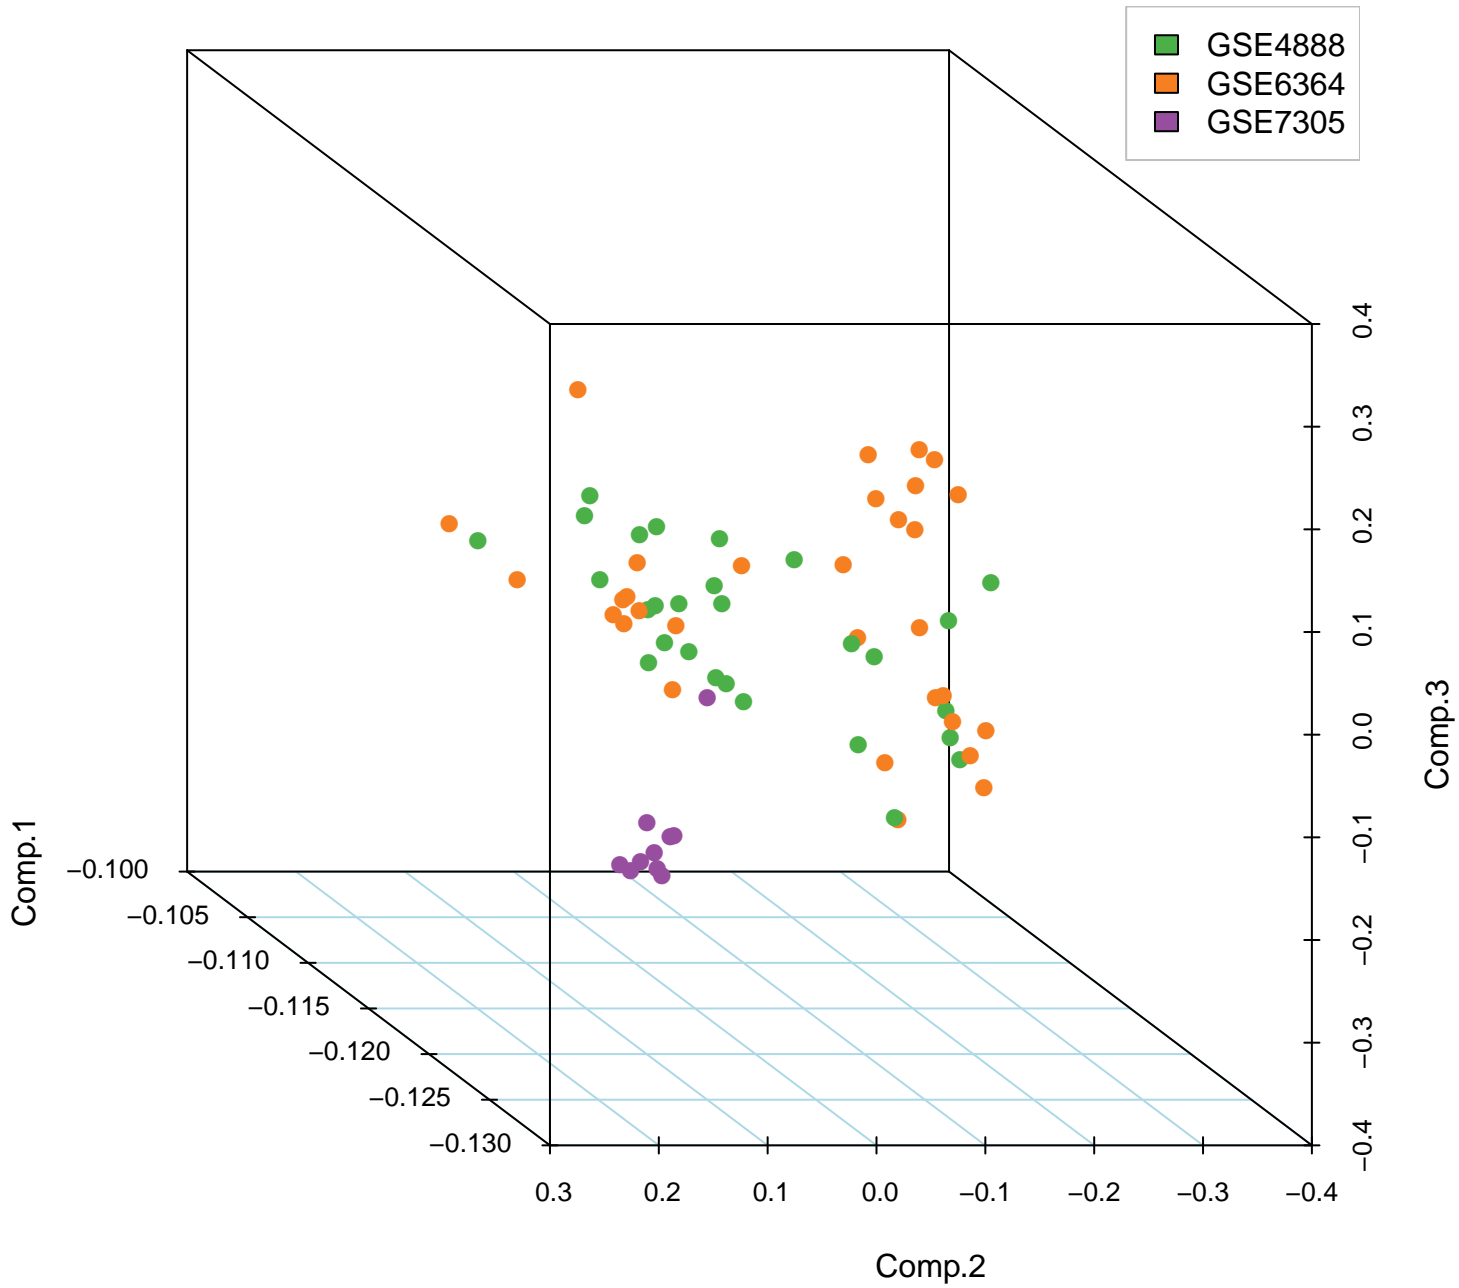

# PCA

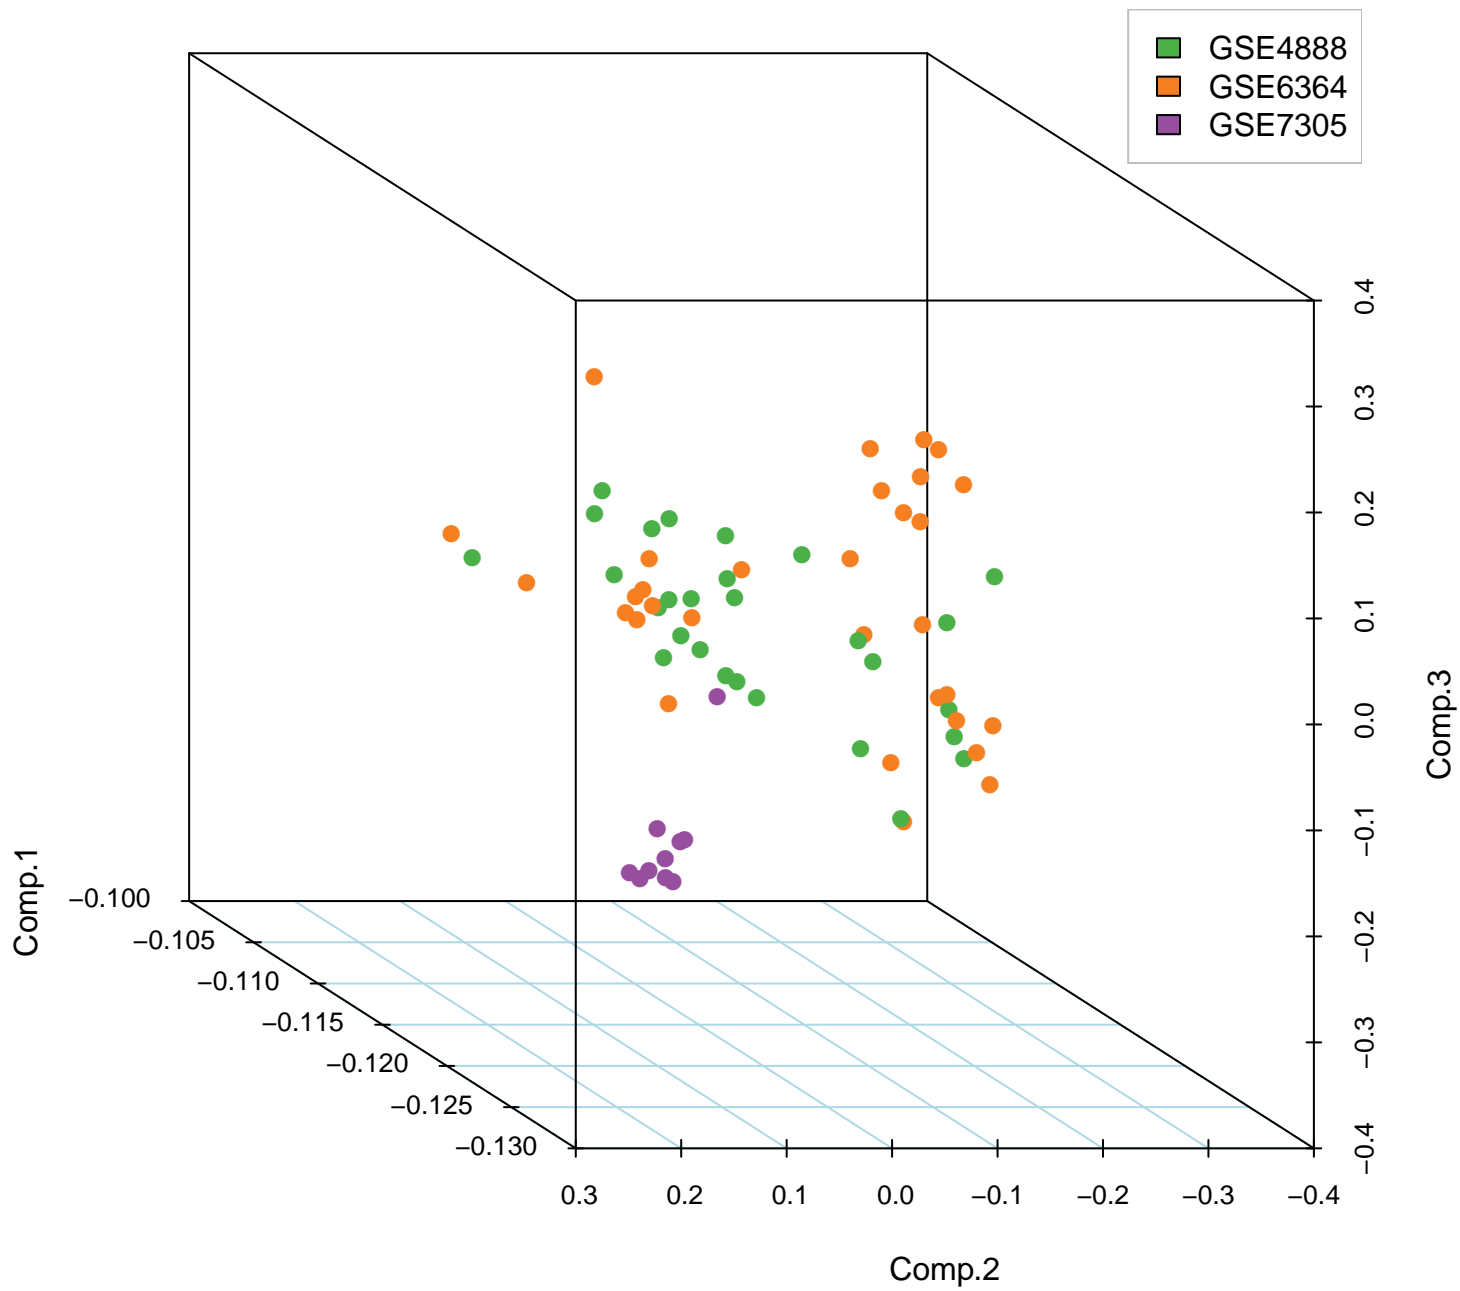

# PCA

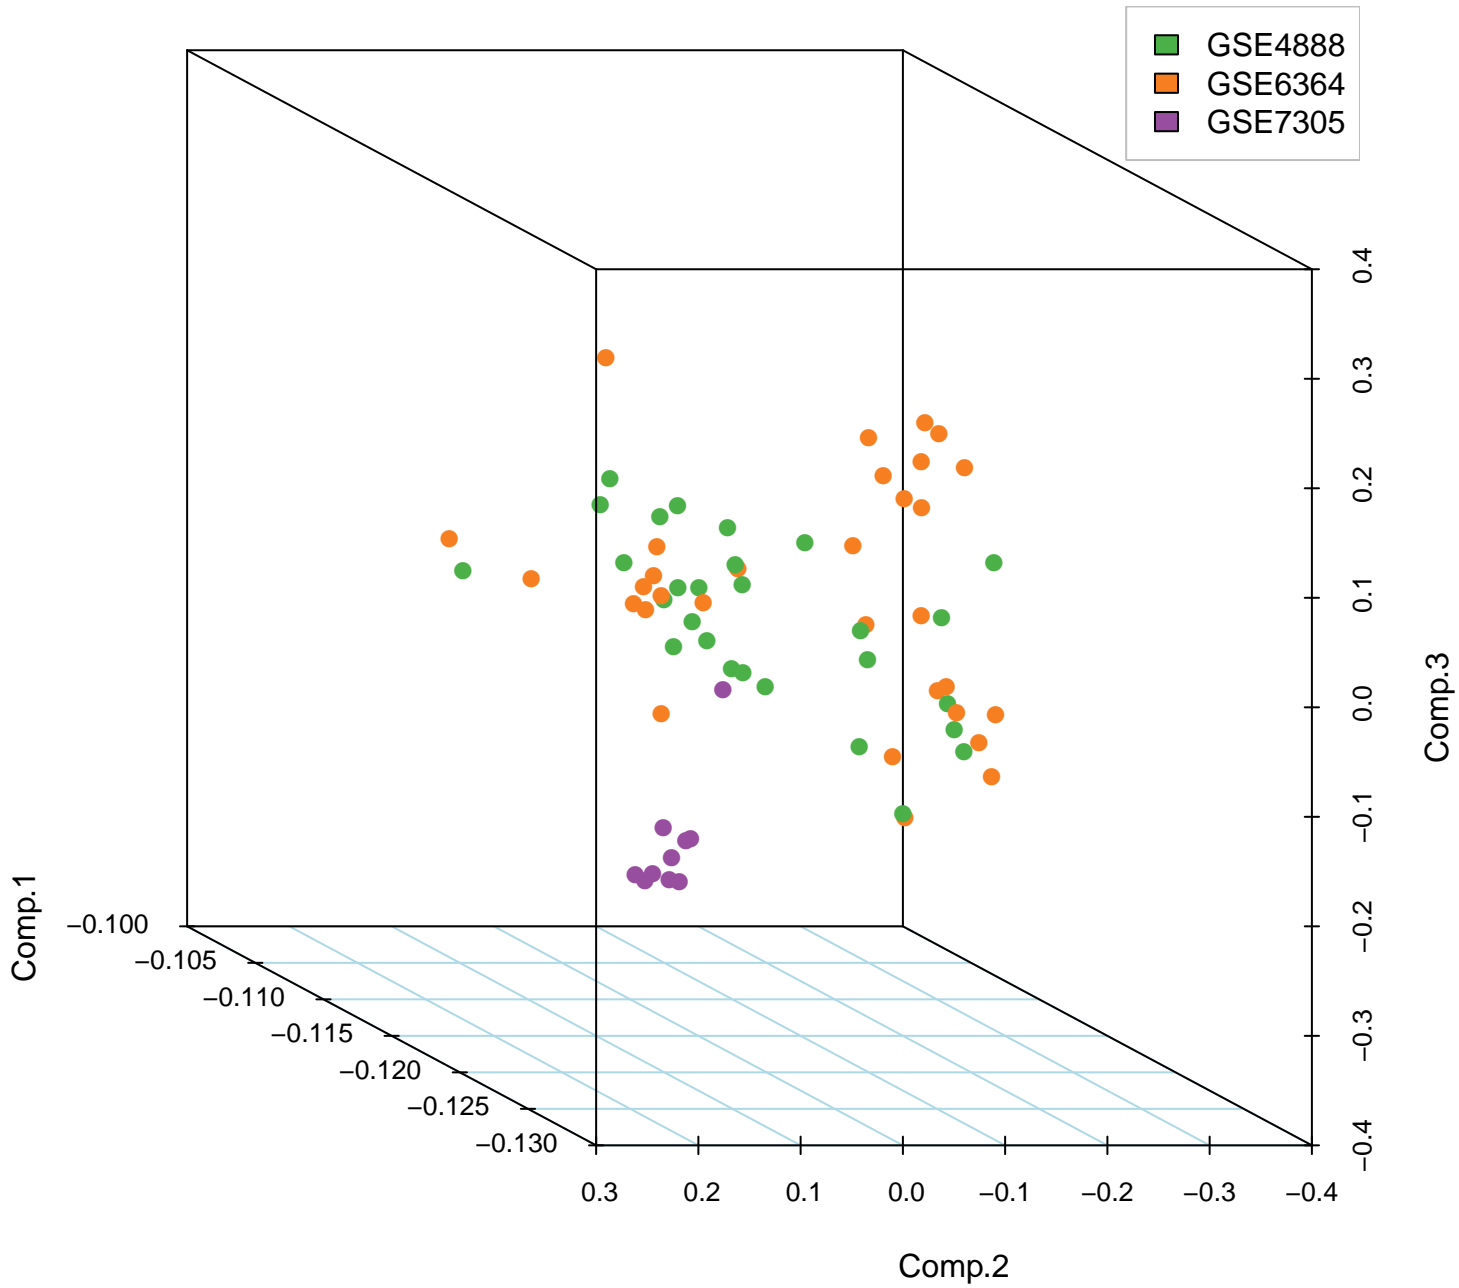

# PCA

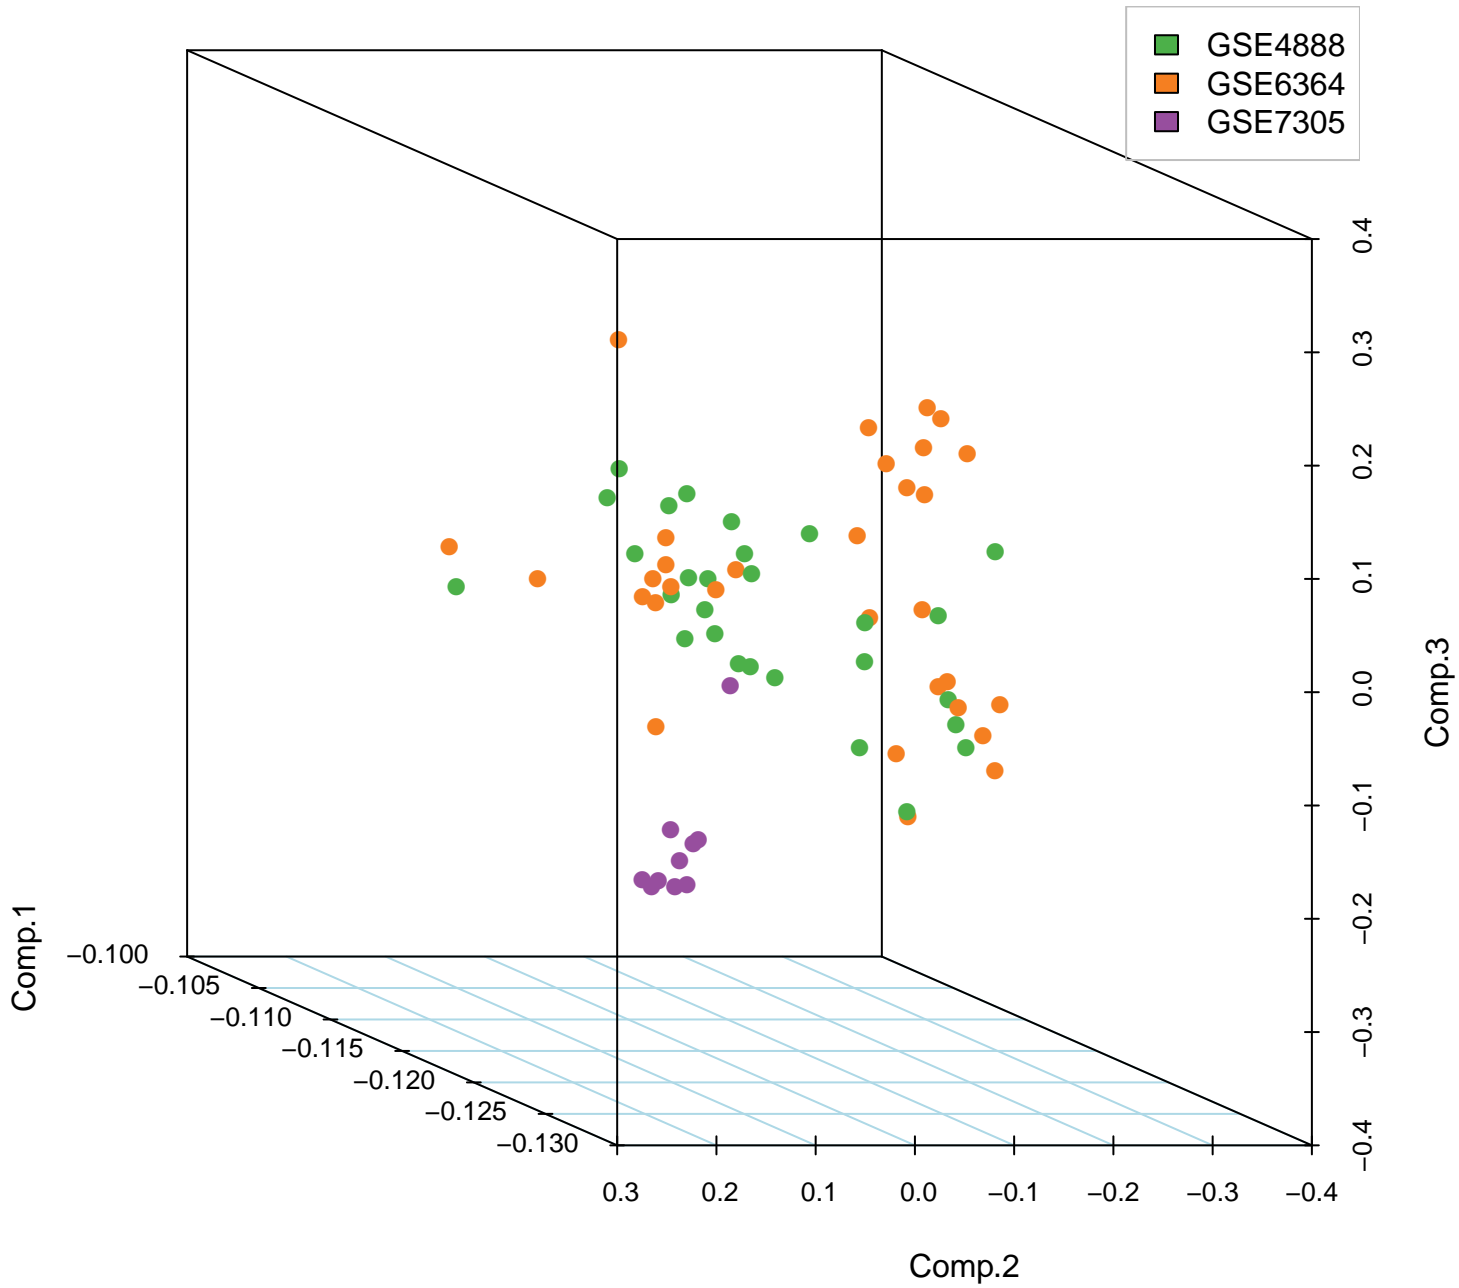

# PCA

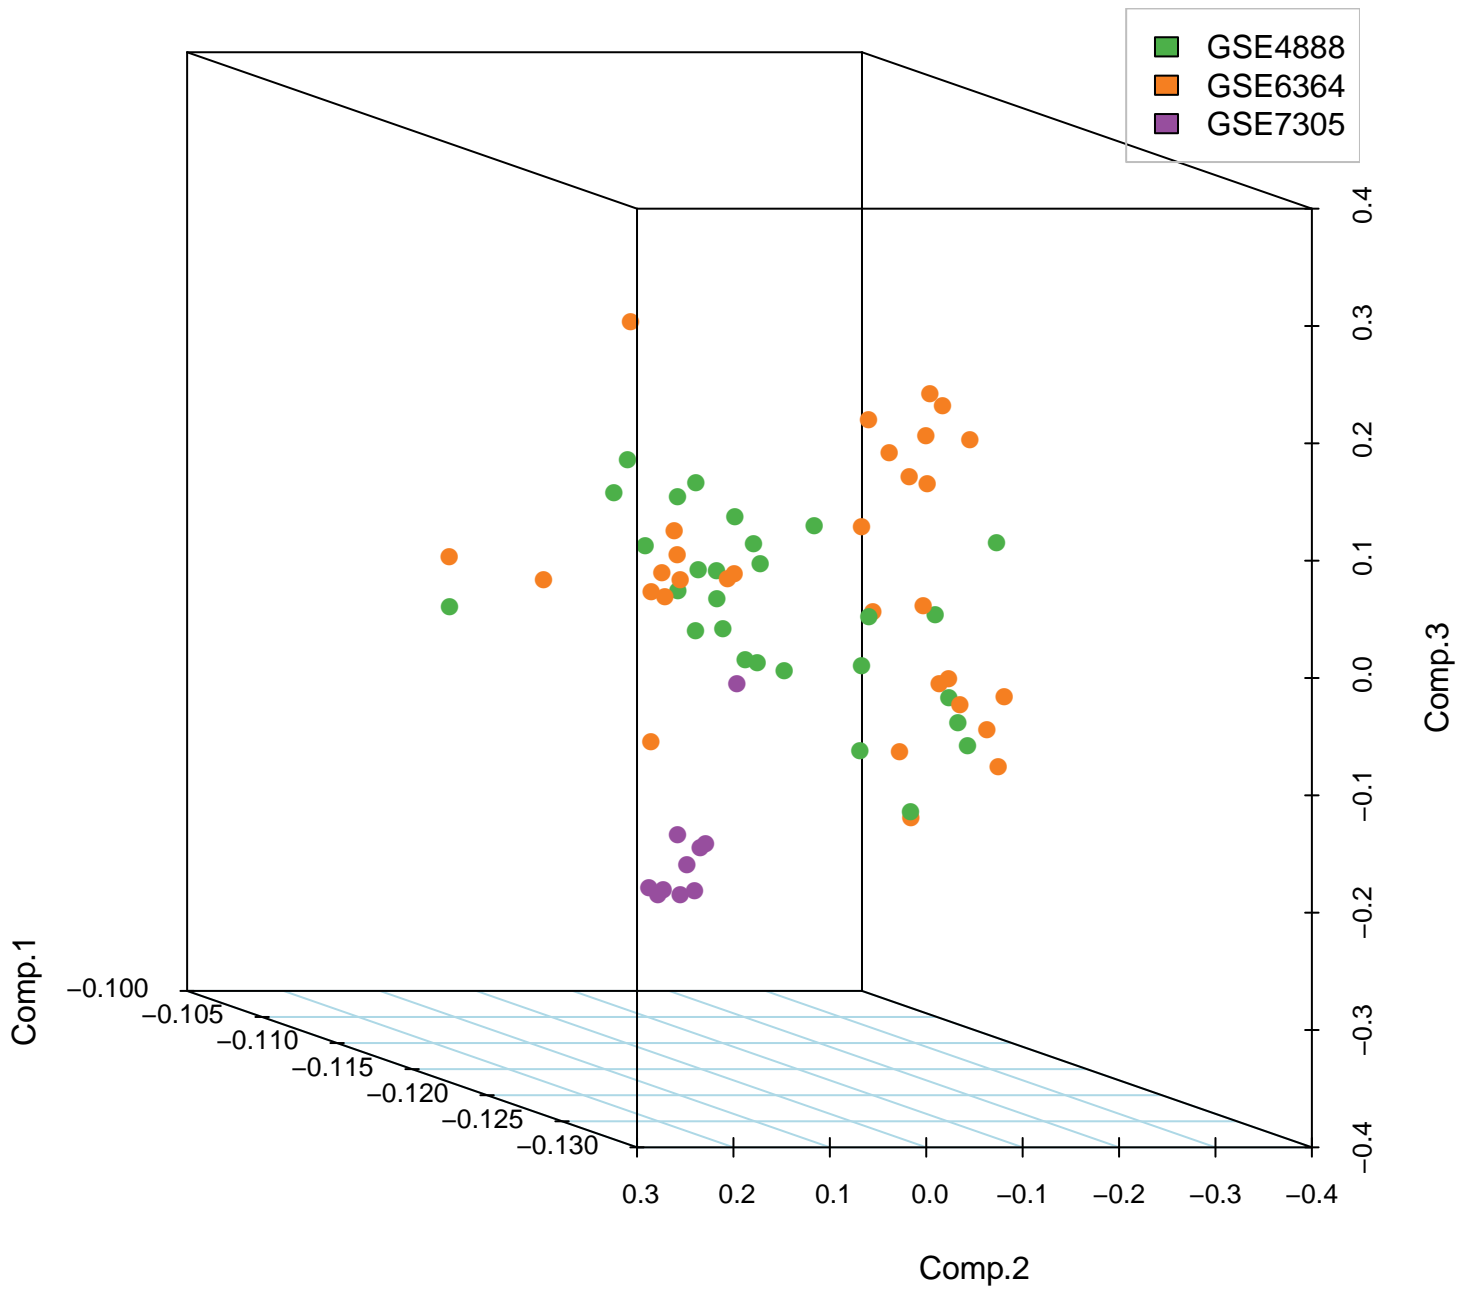

# PCA

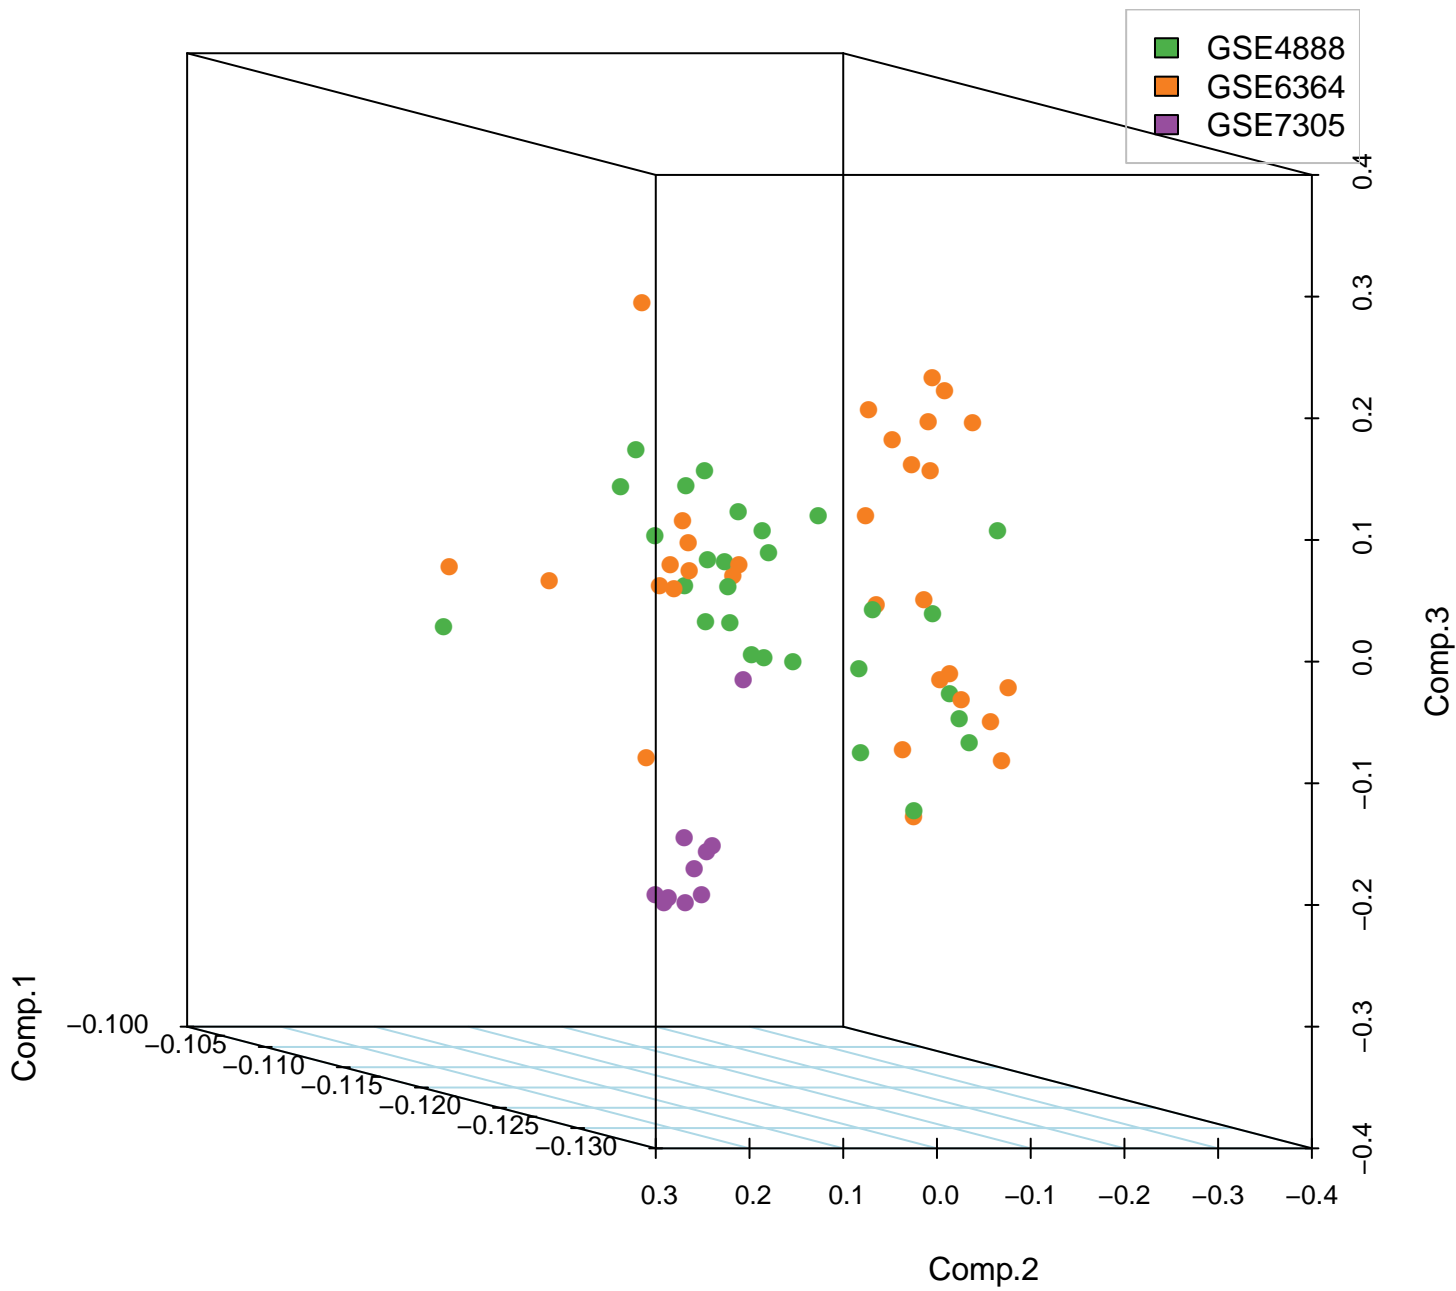

# PCA

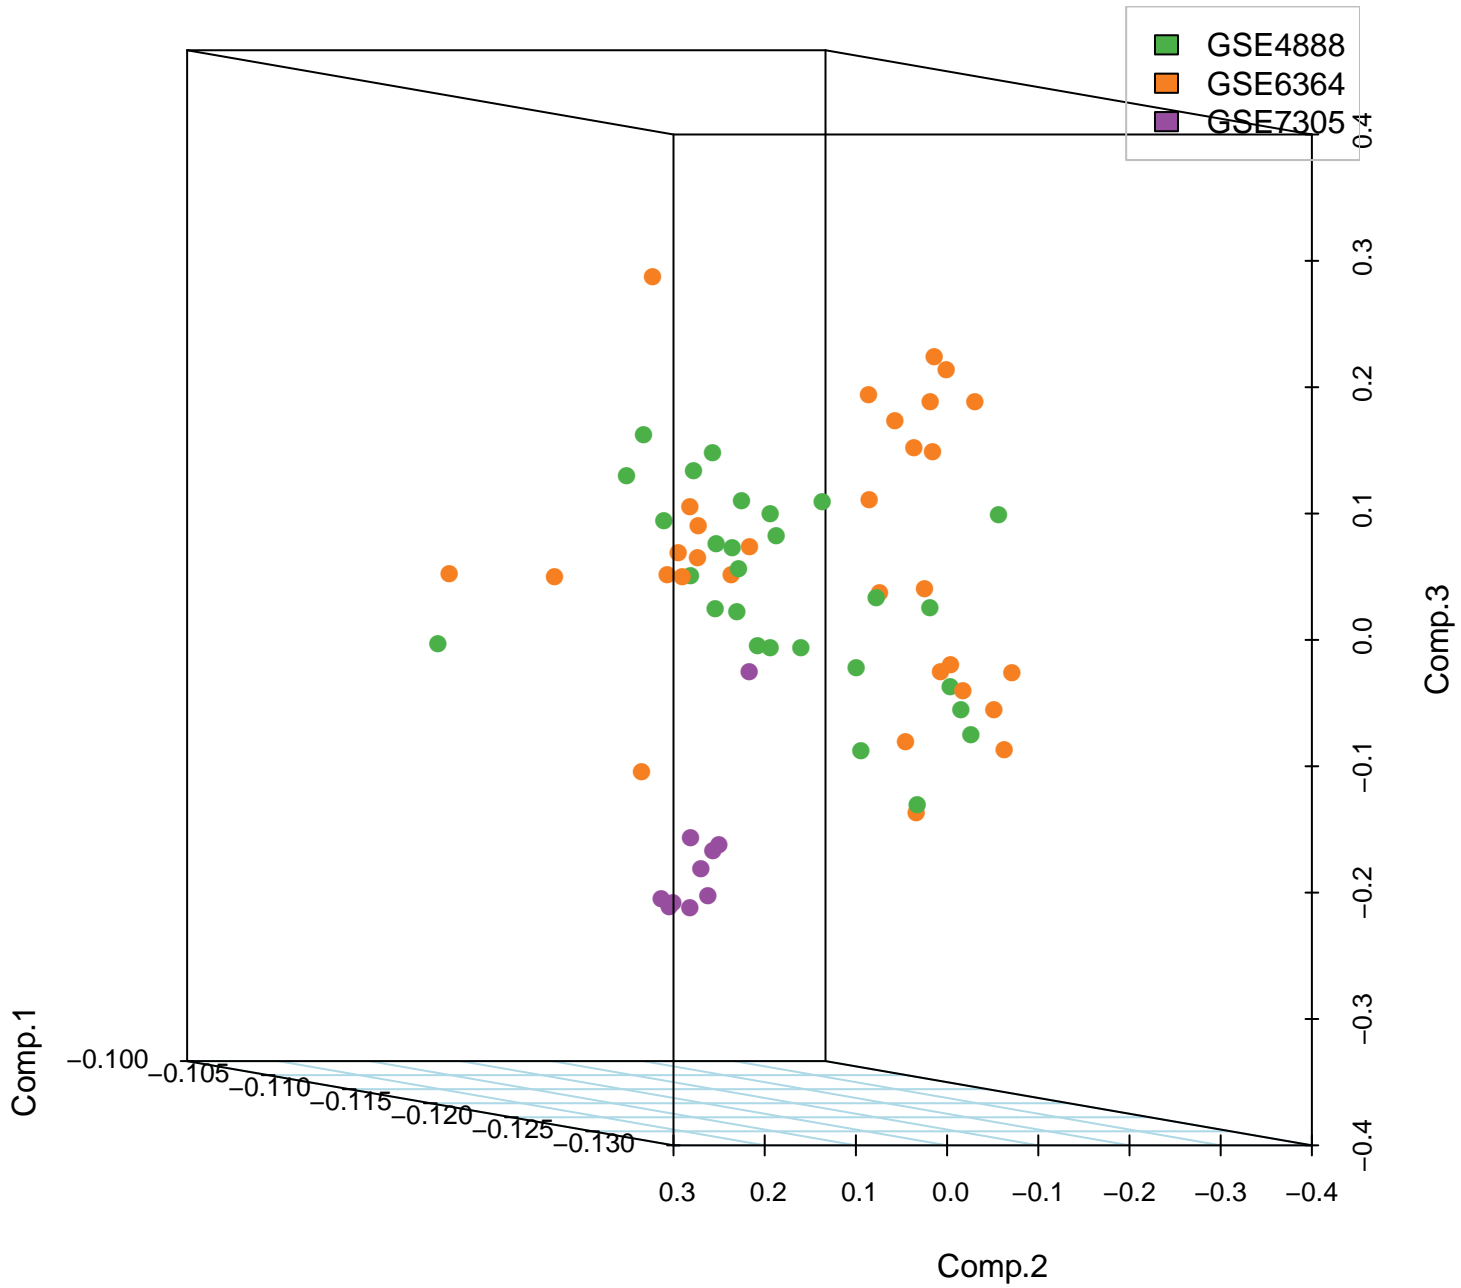

# PCA

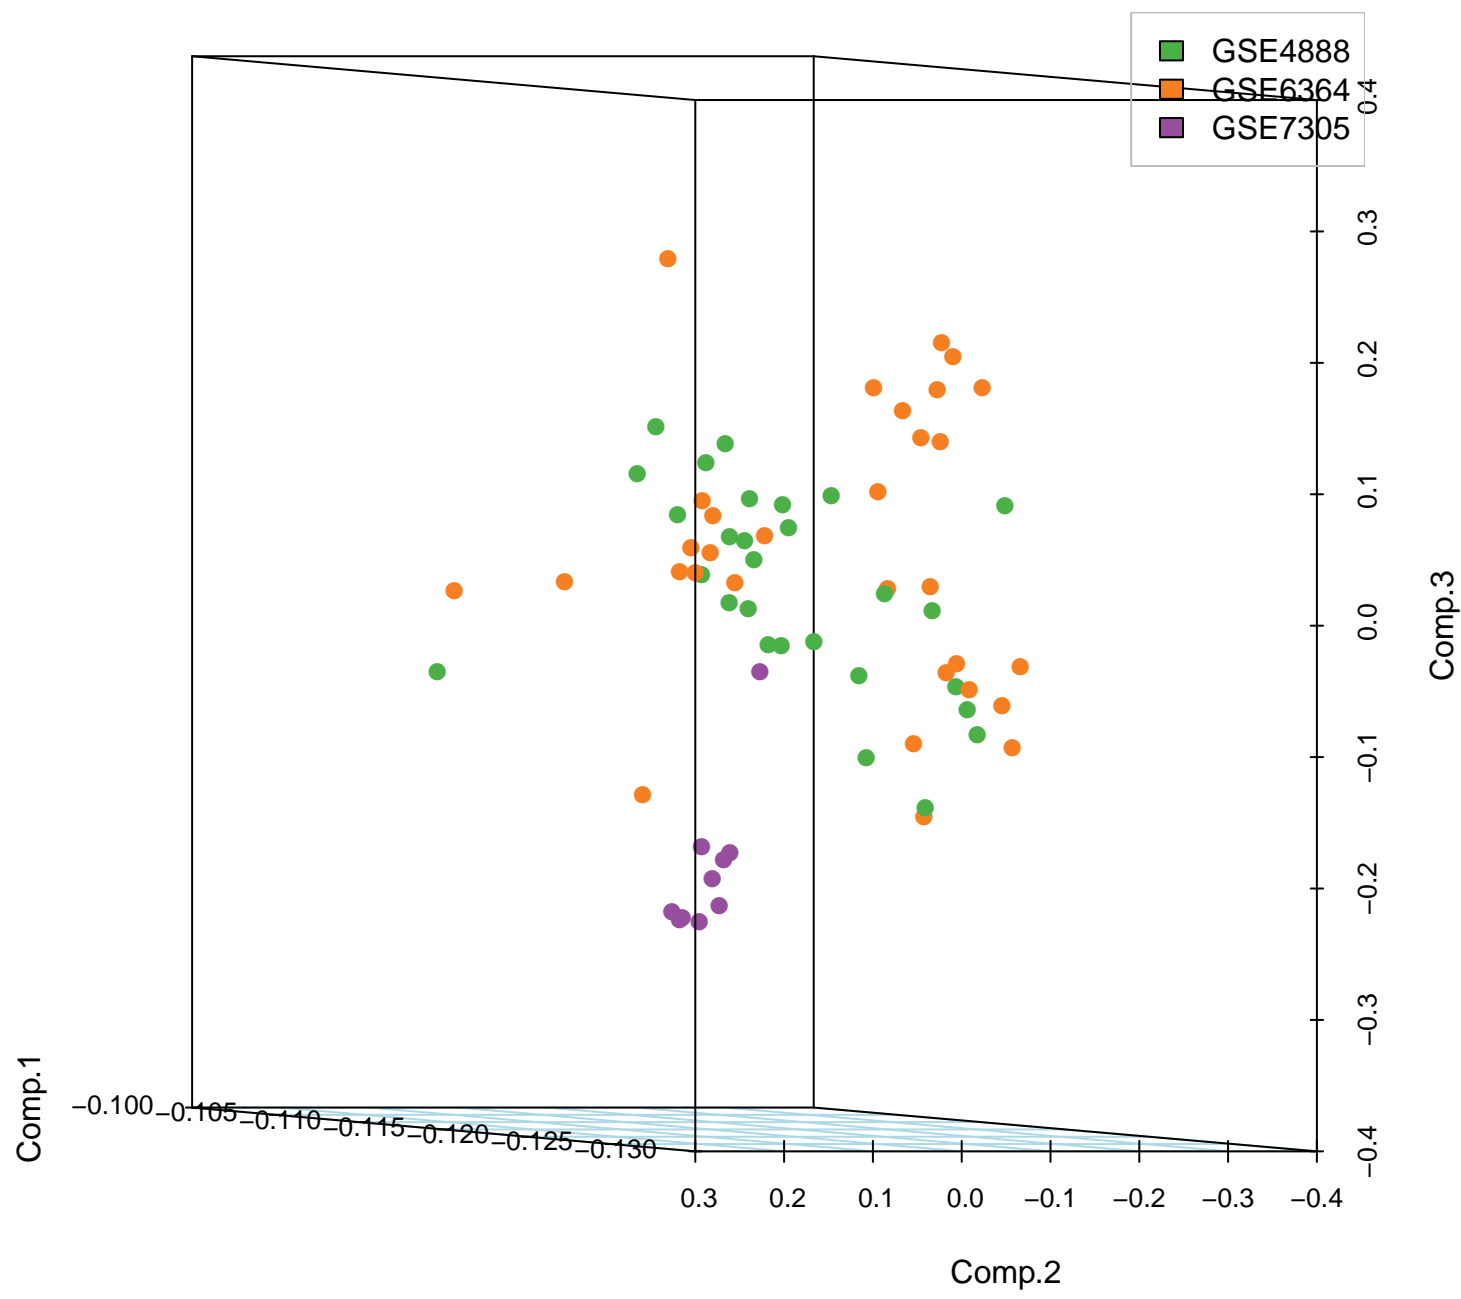



# PCA

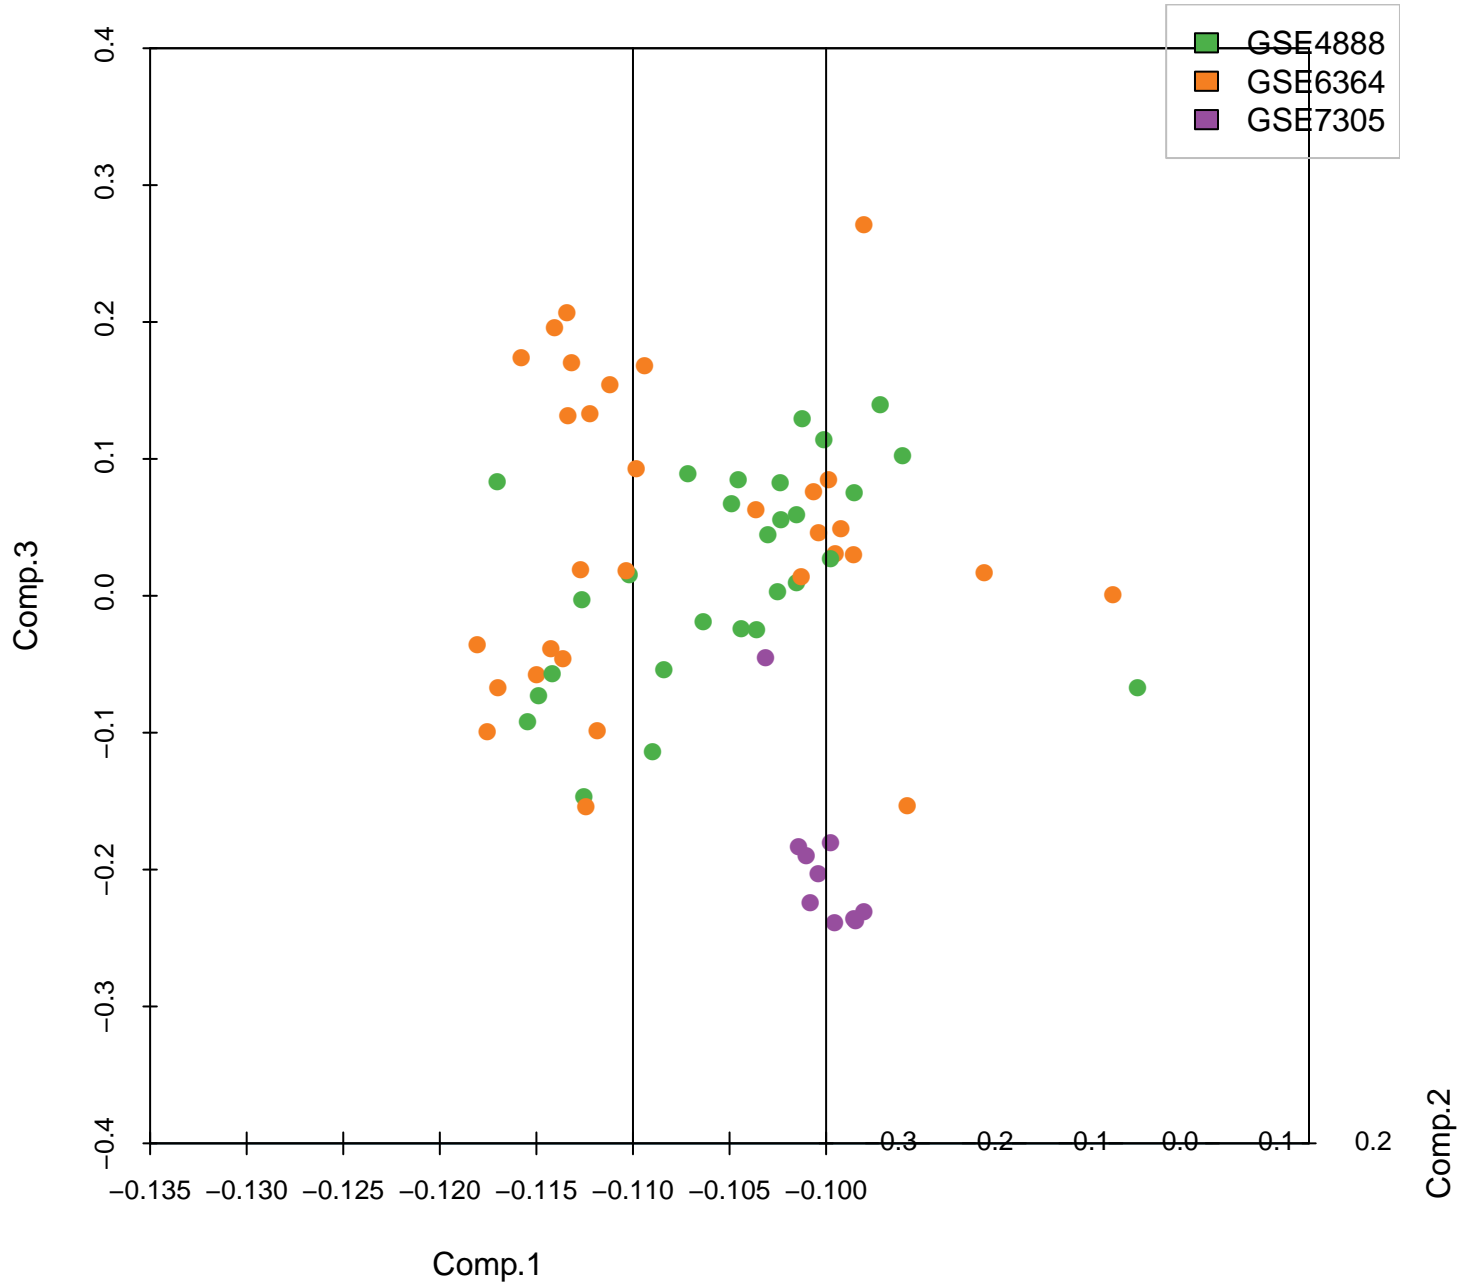





# PCA

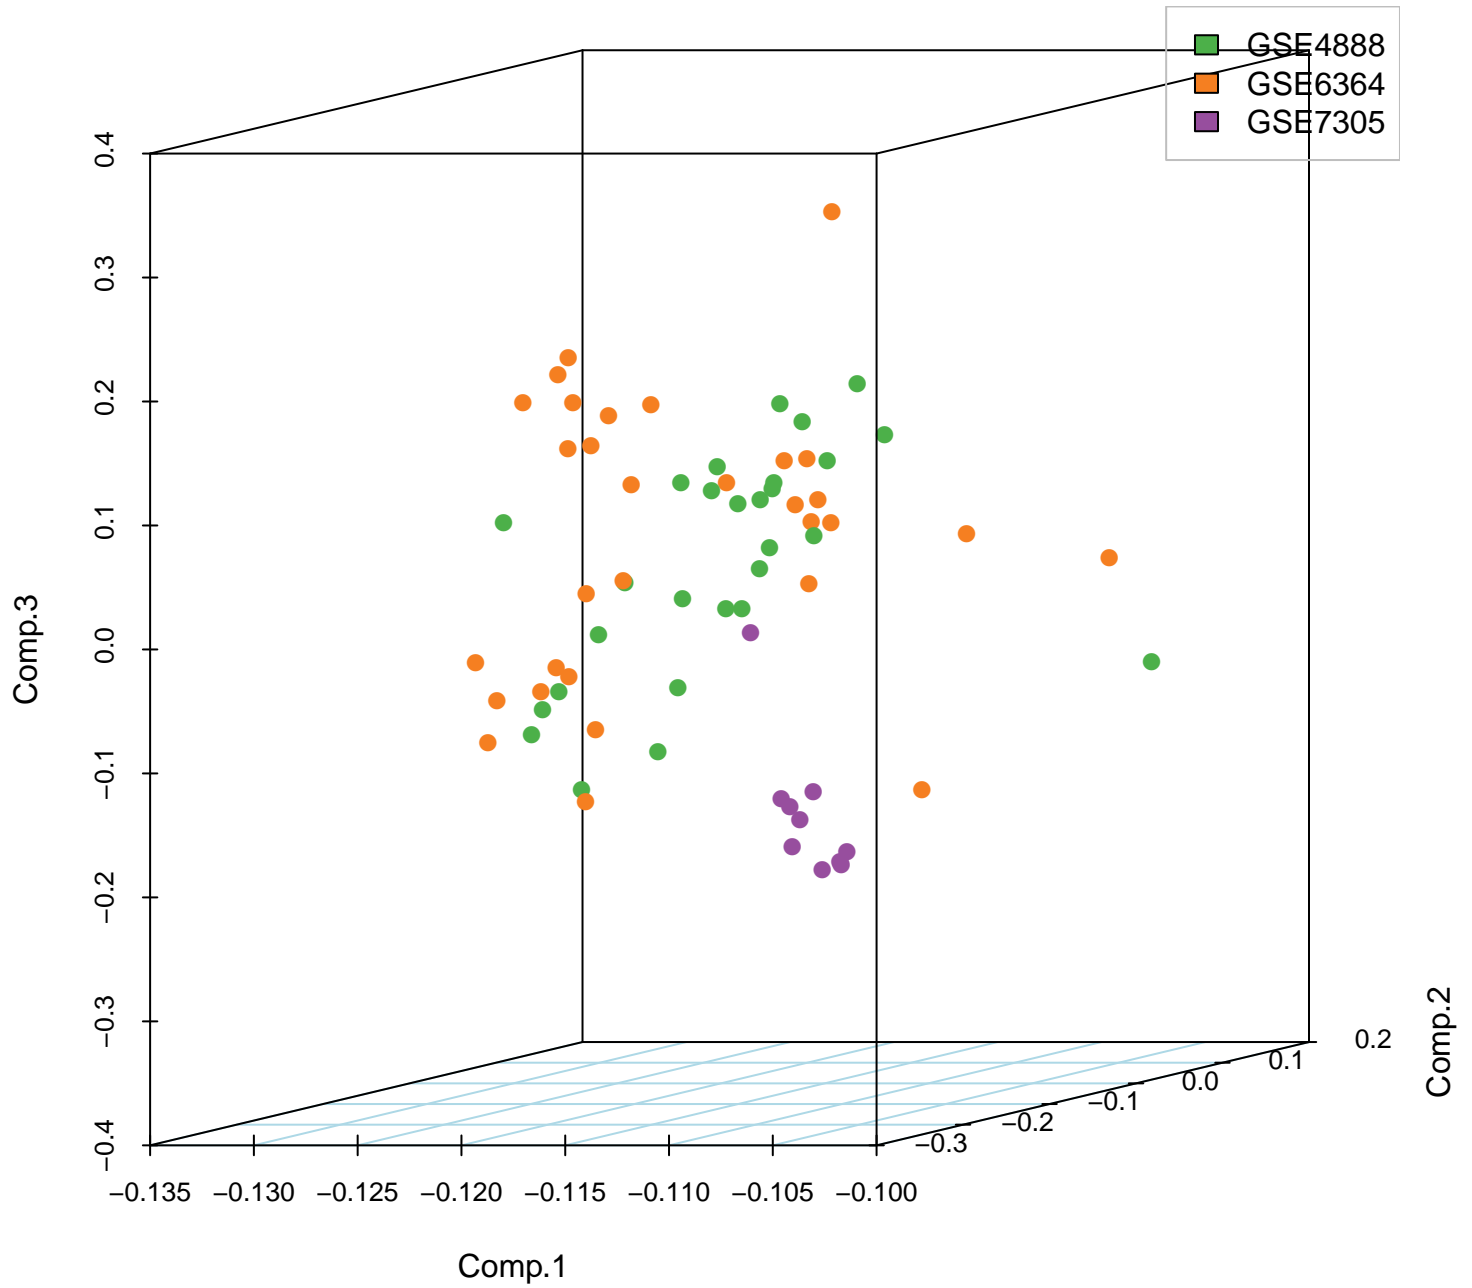



# PCA



# PCA

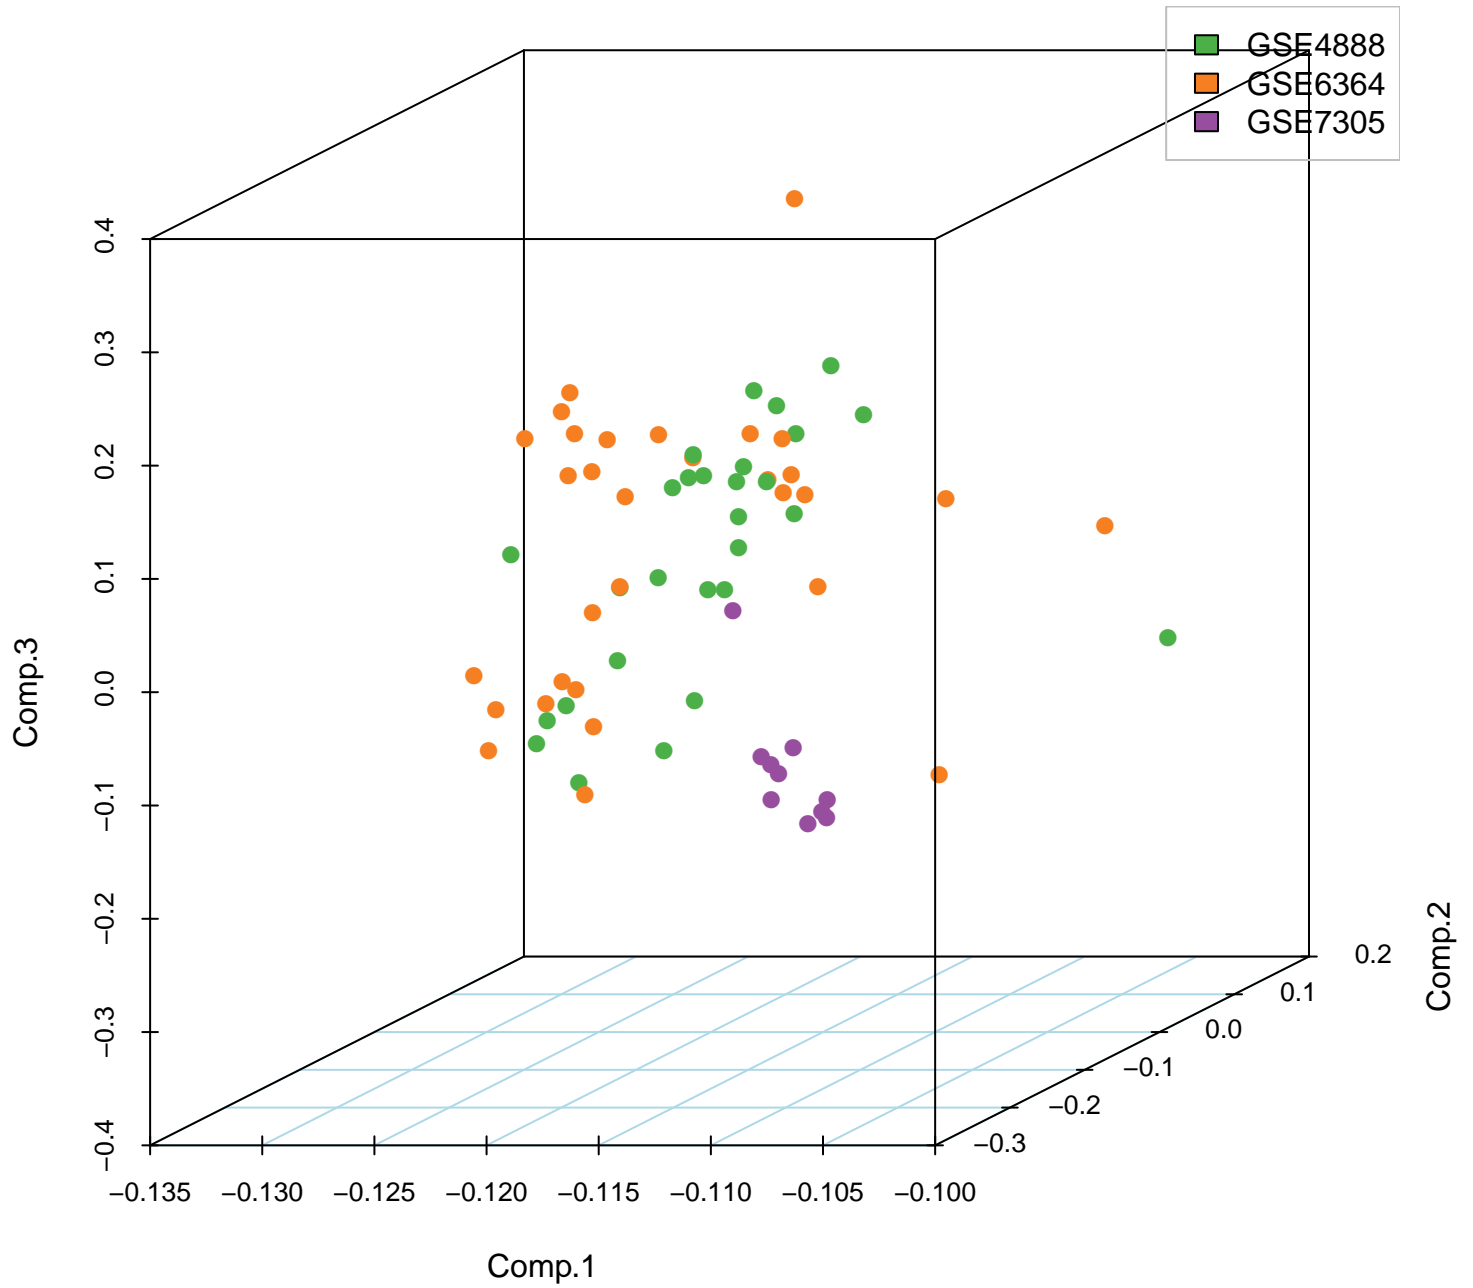

# PCA

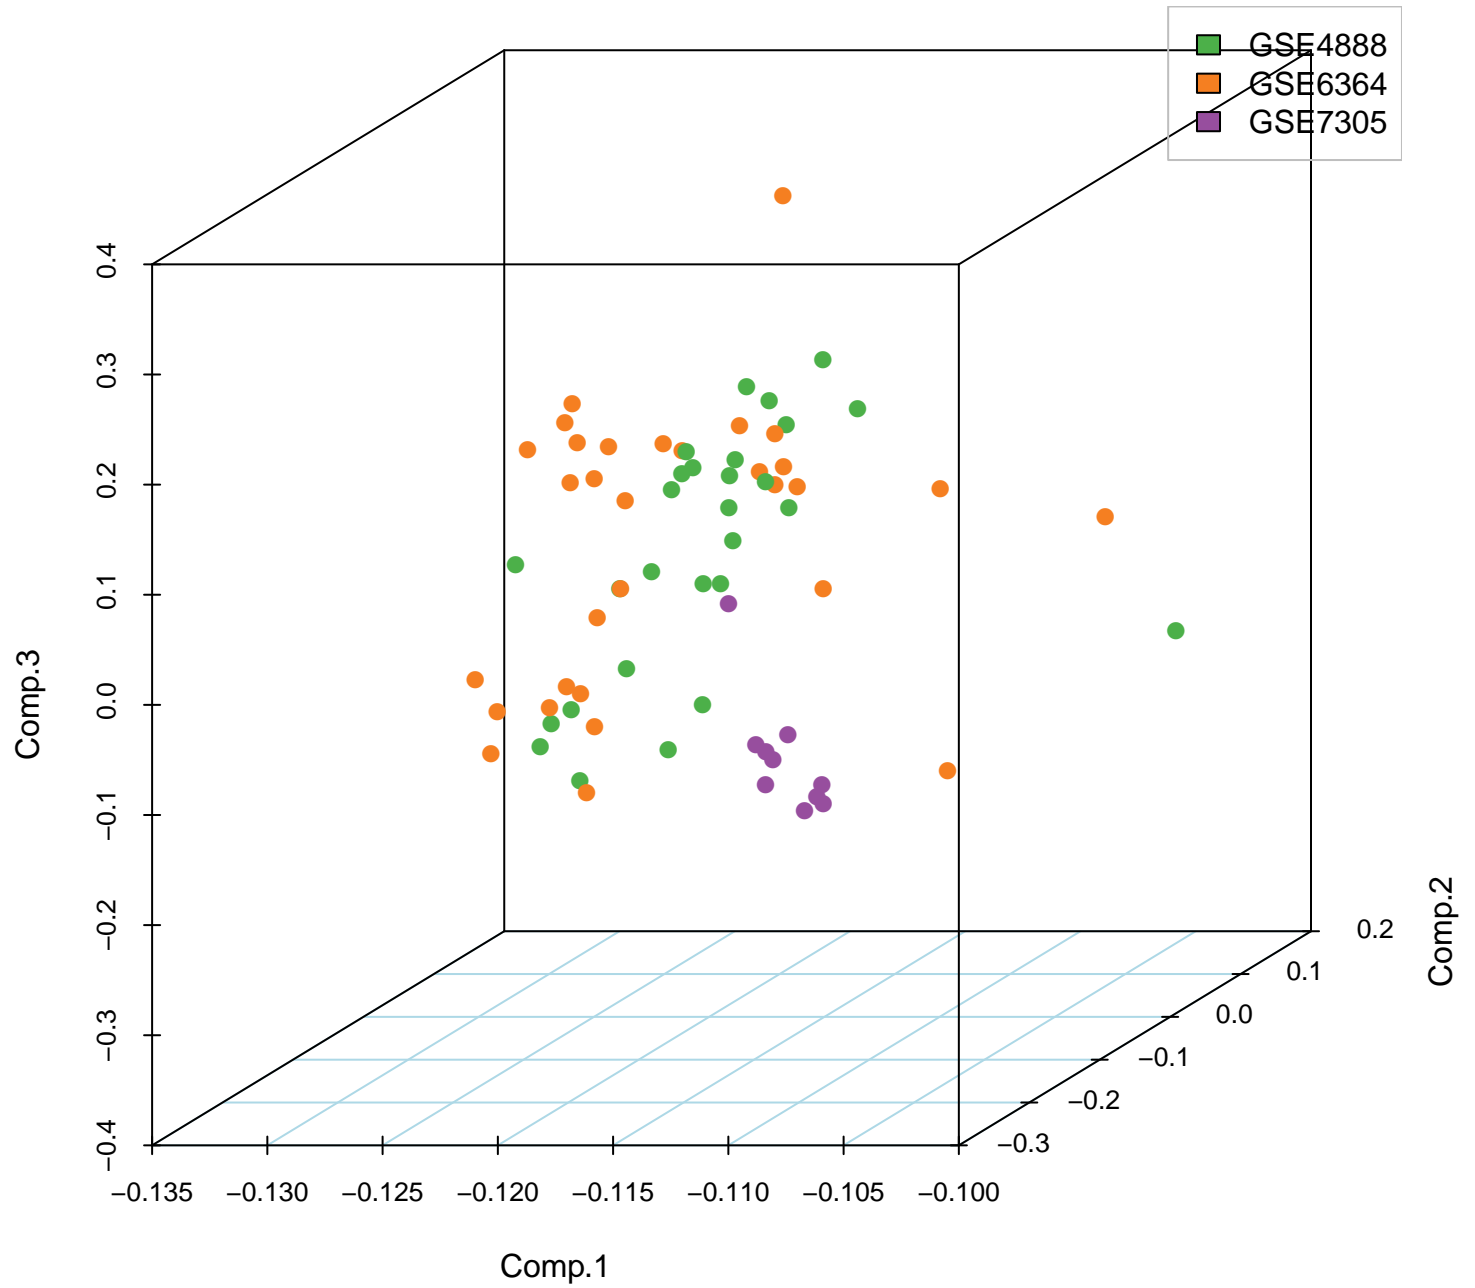



# PCA

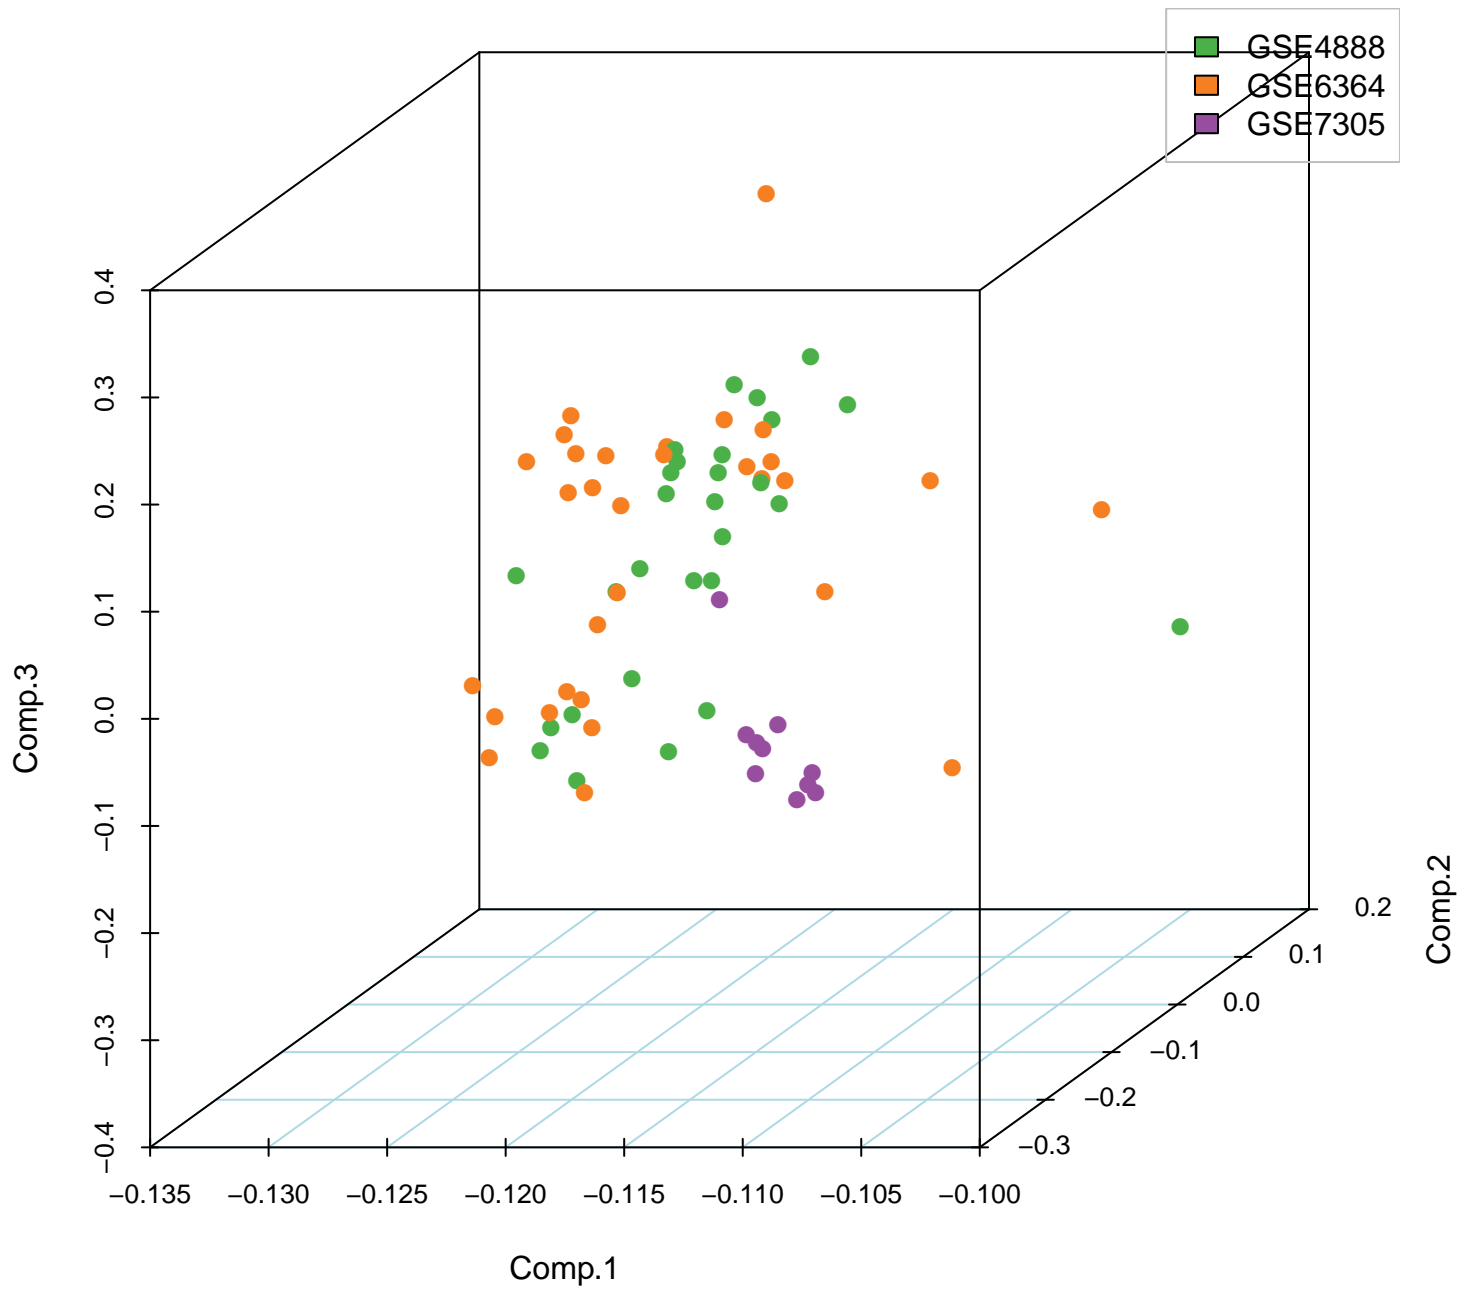

# PCA

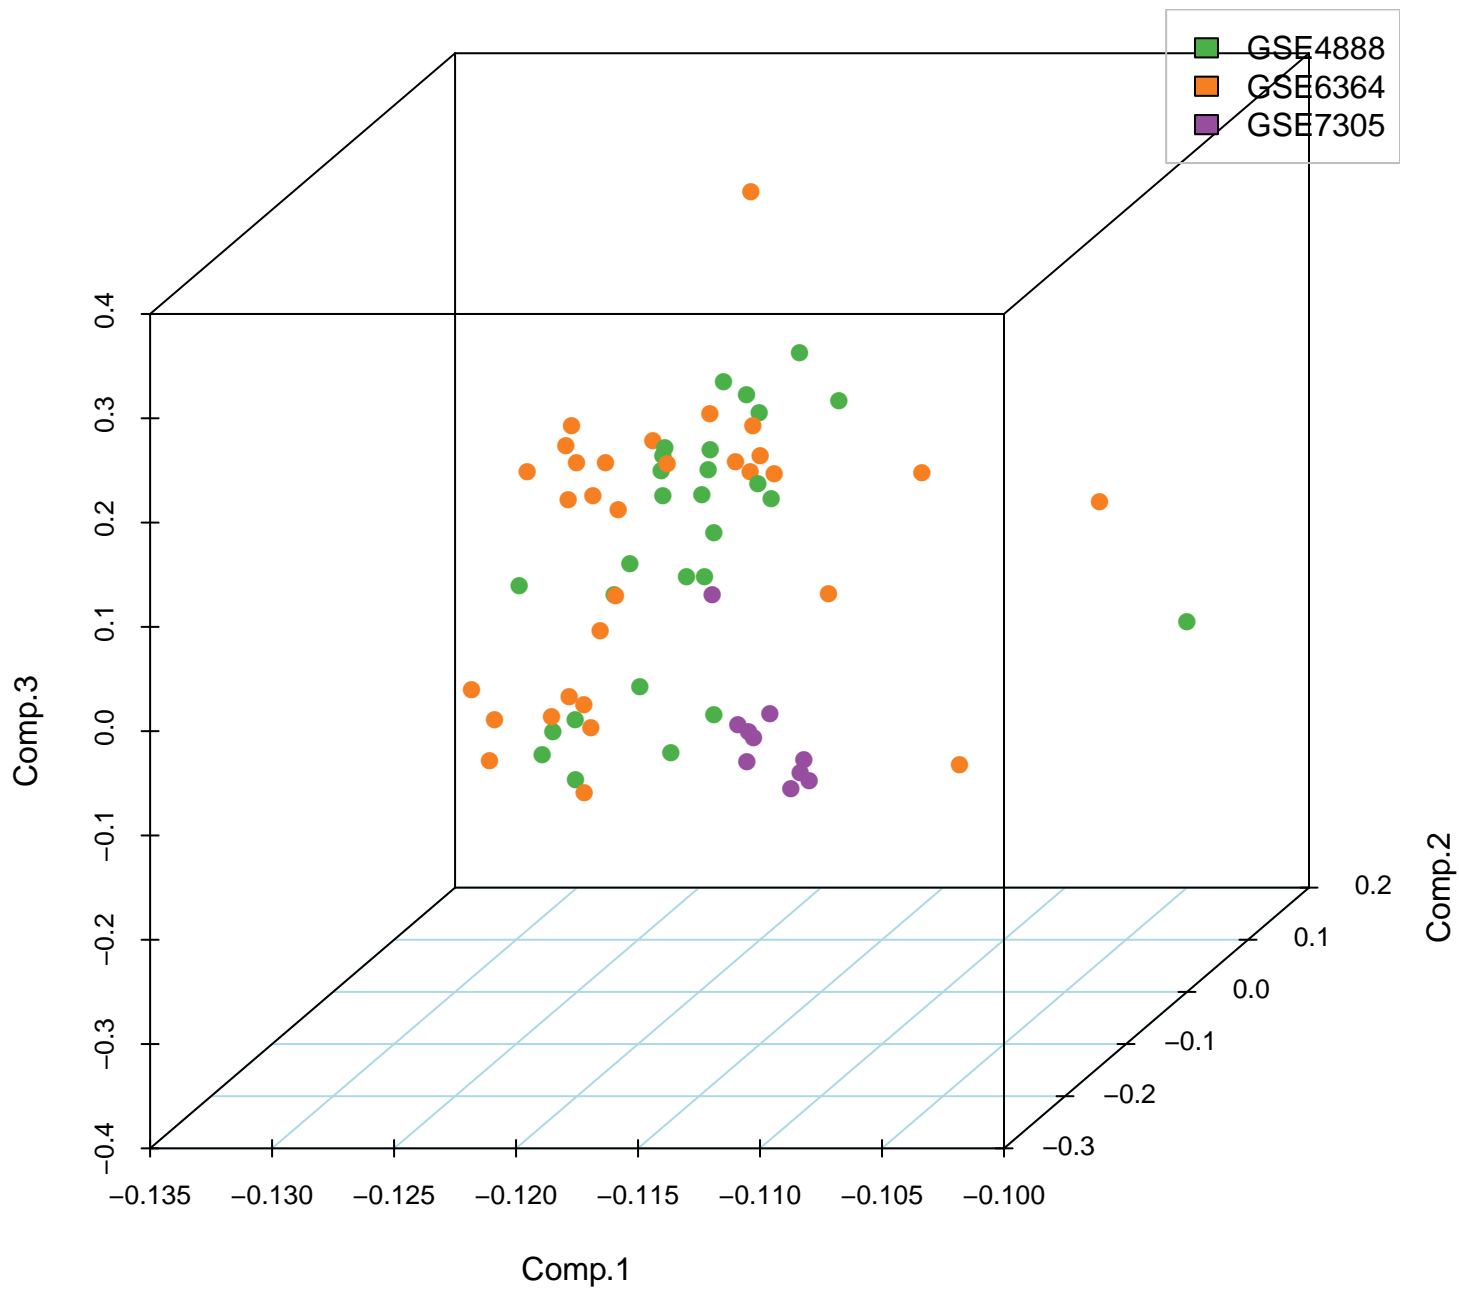

# PCA

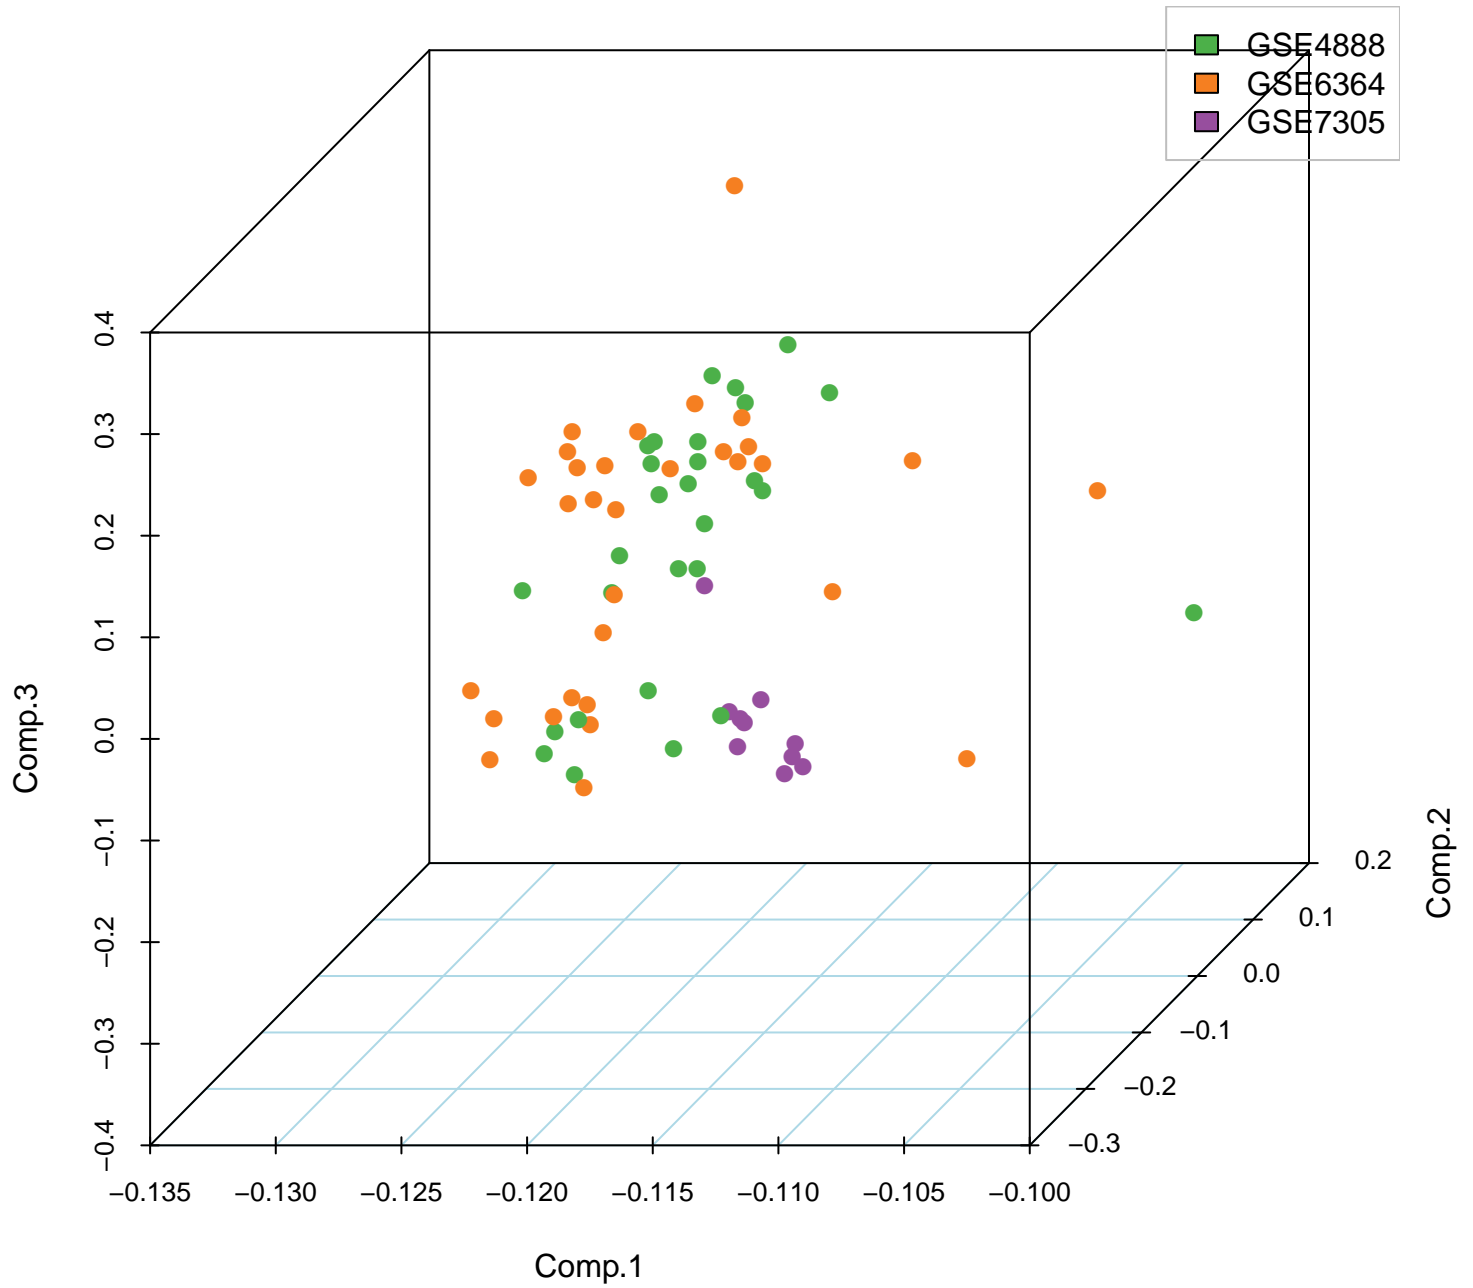

# PCA

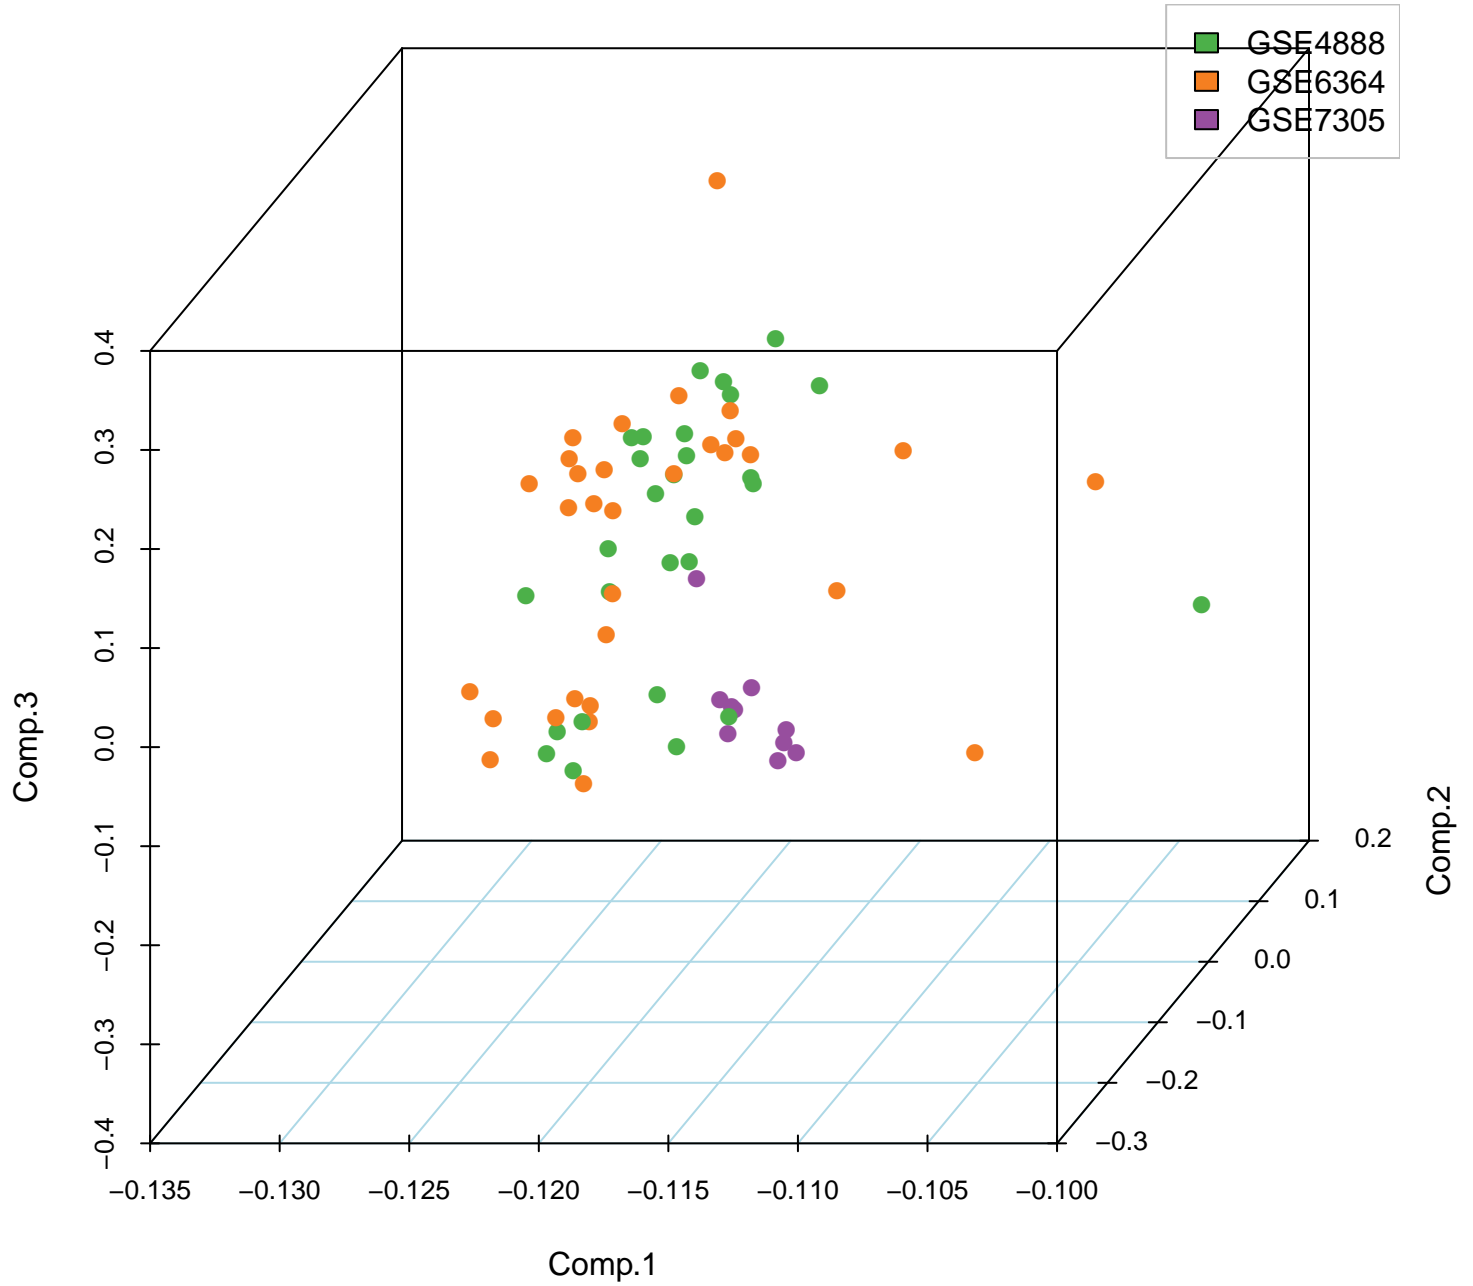

# PCA

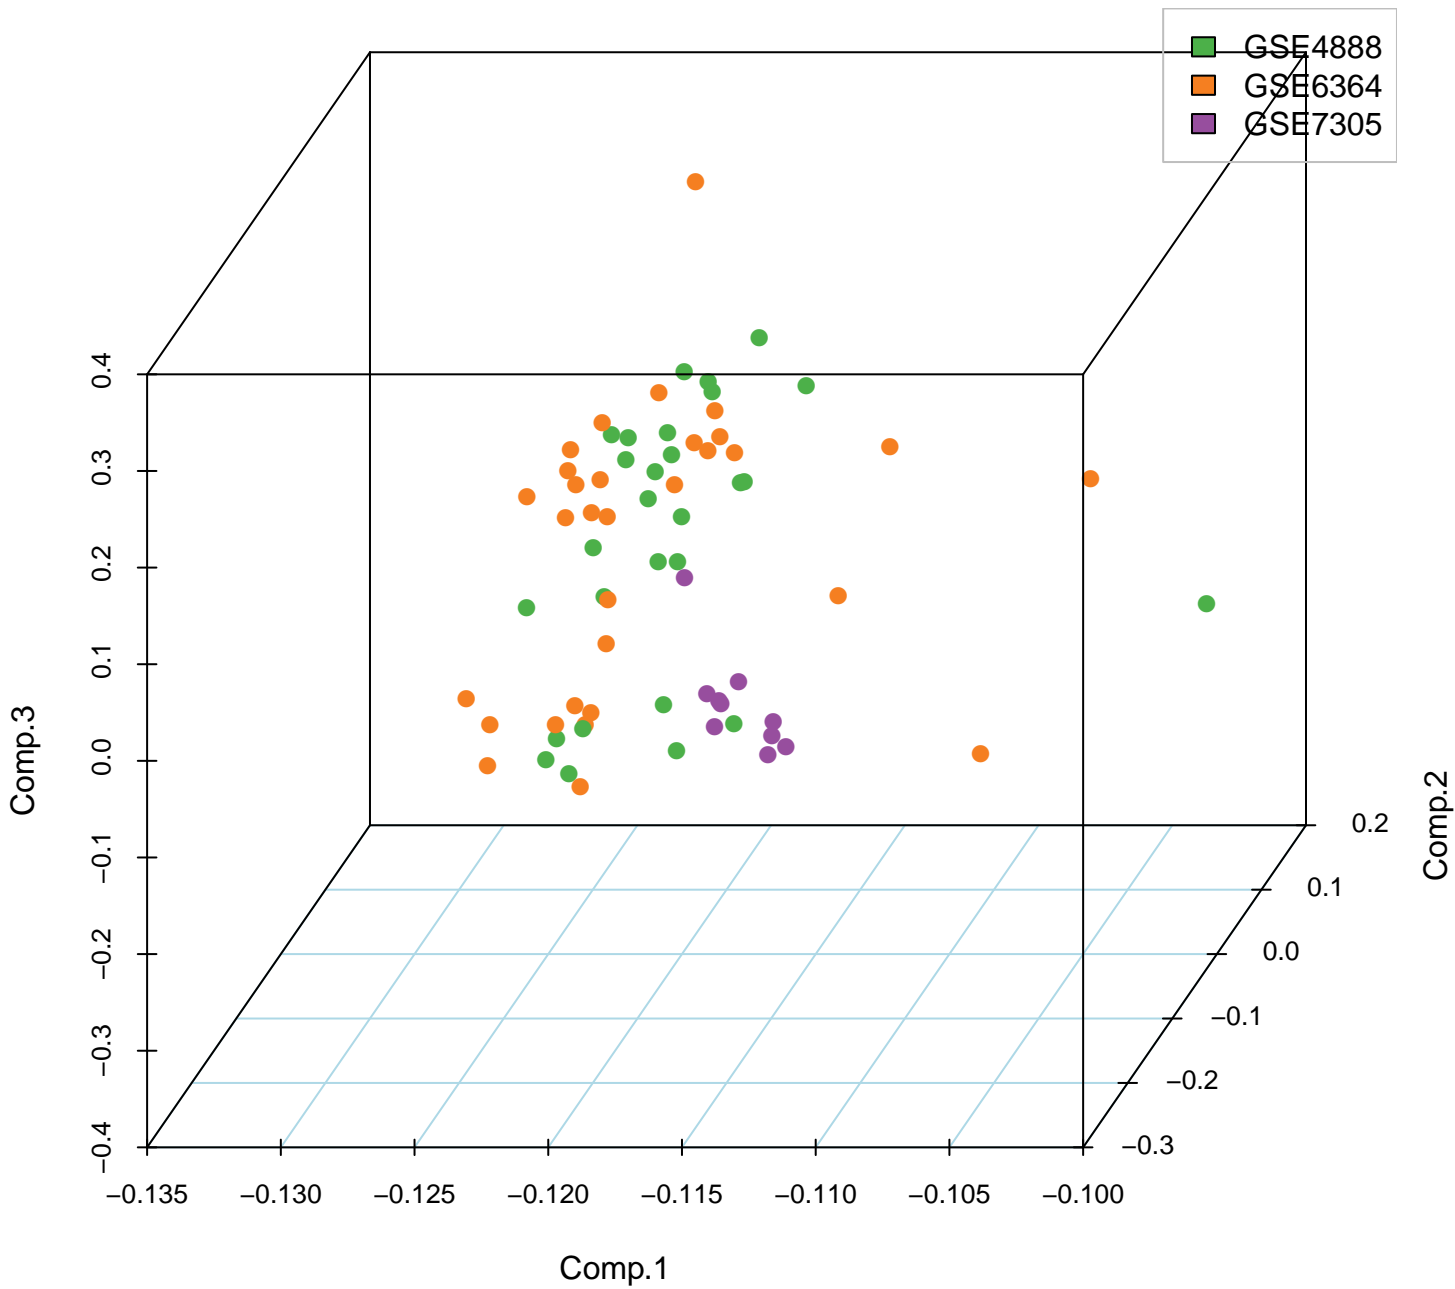

# PCA

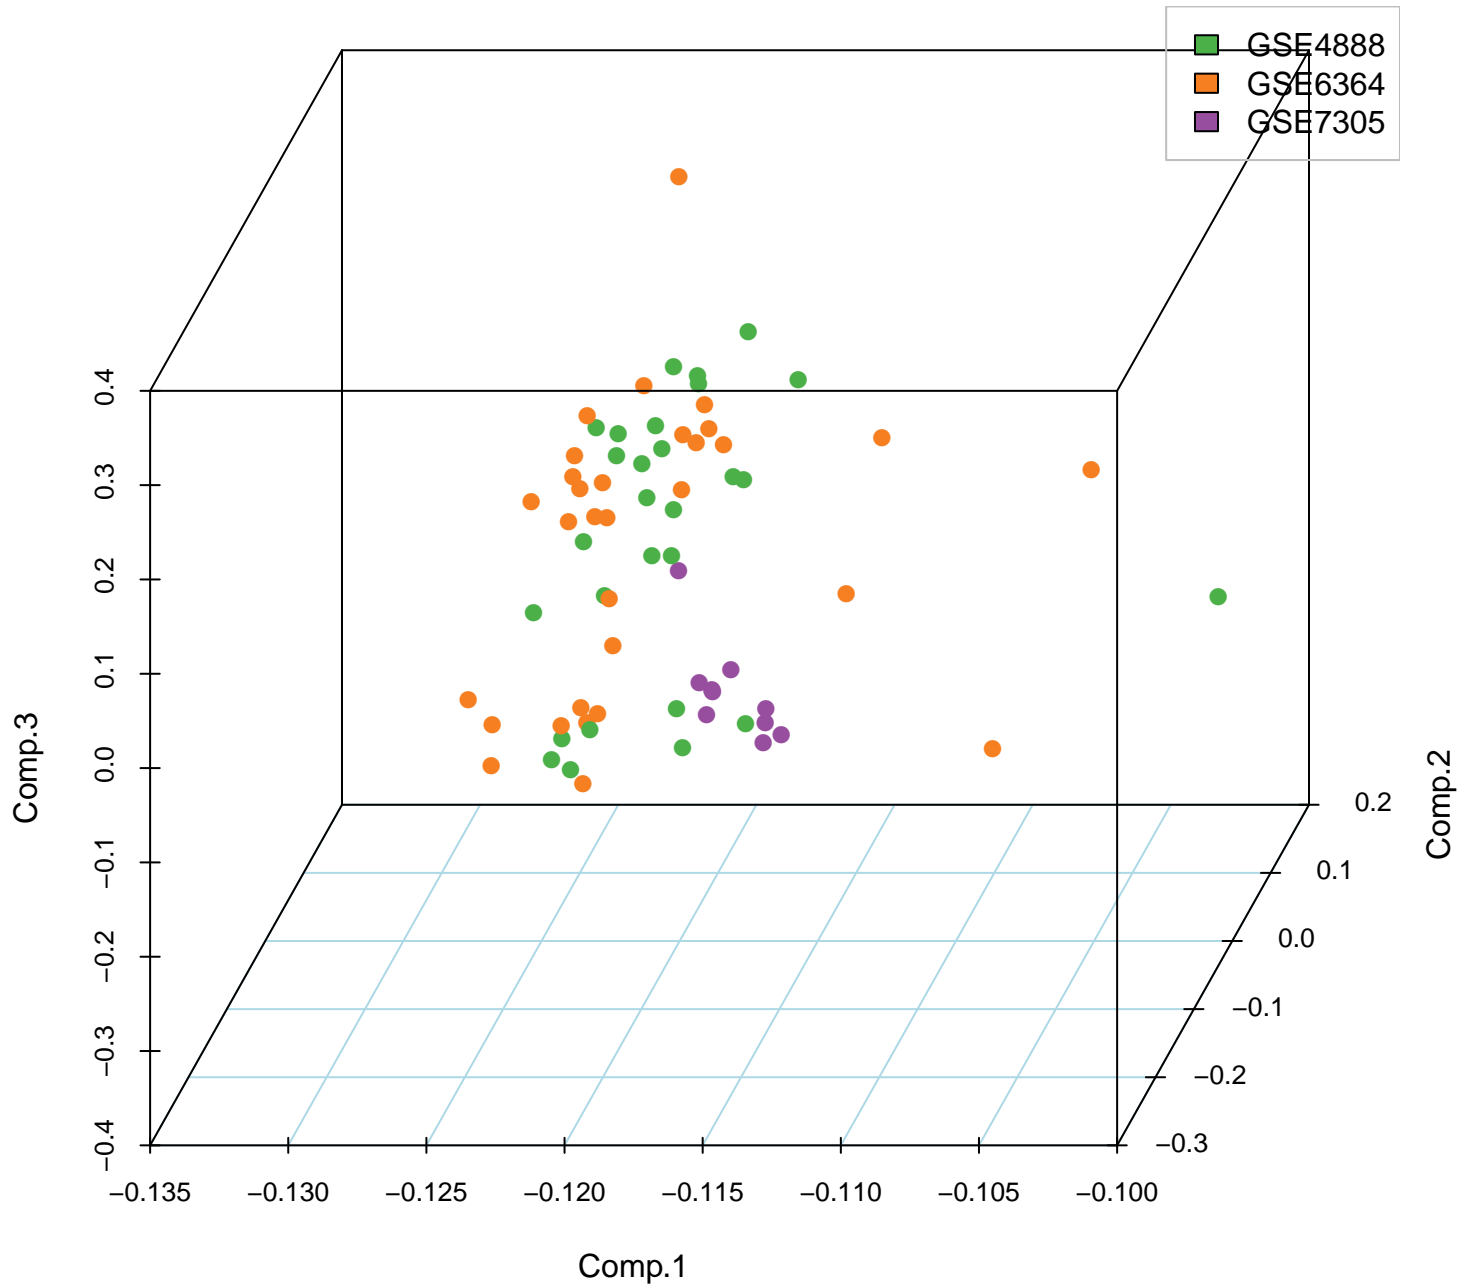



# PCA

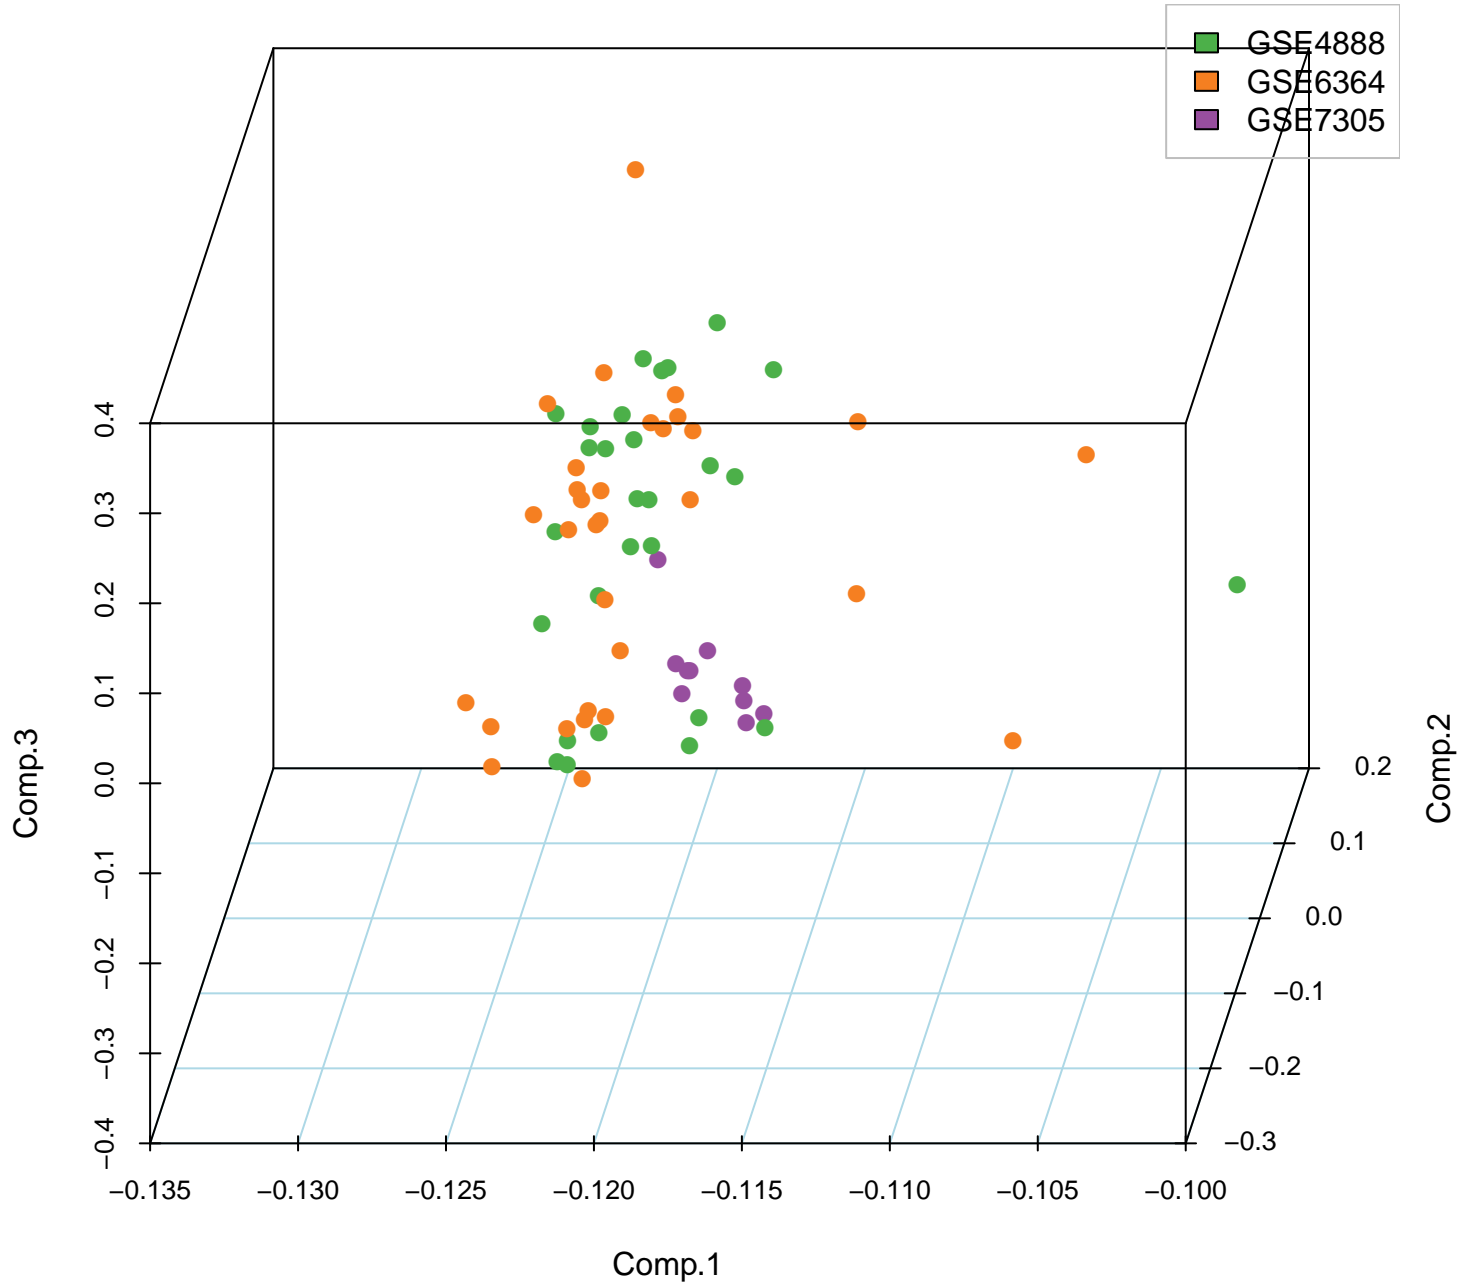



# PCA



# PCA

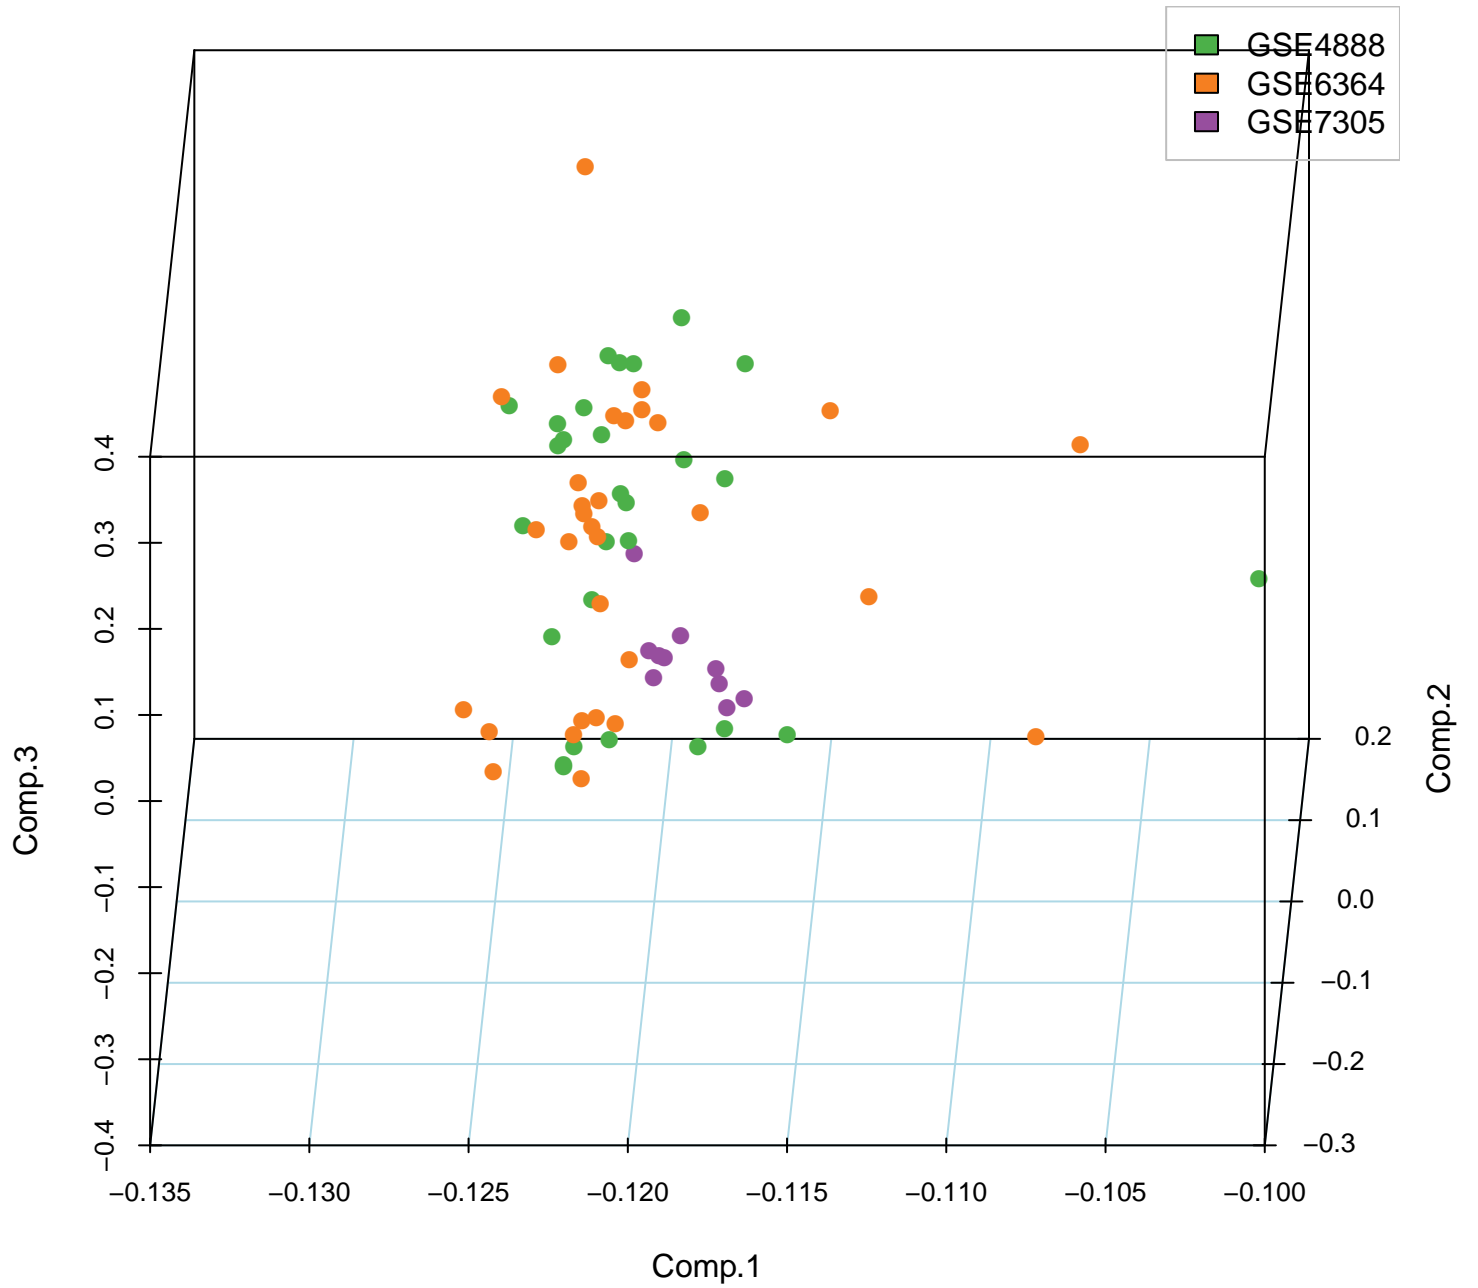

# PCA



# PCA

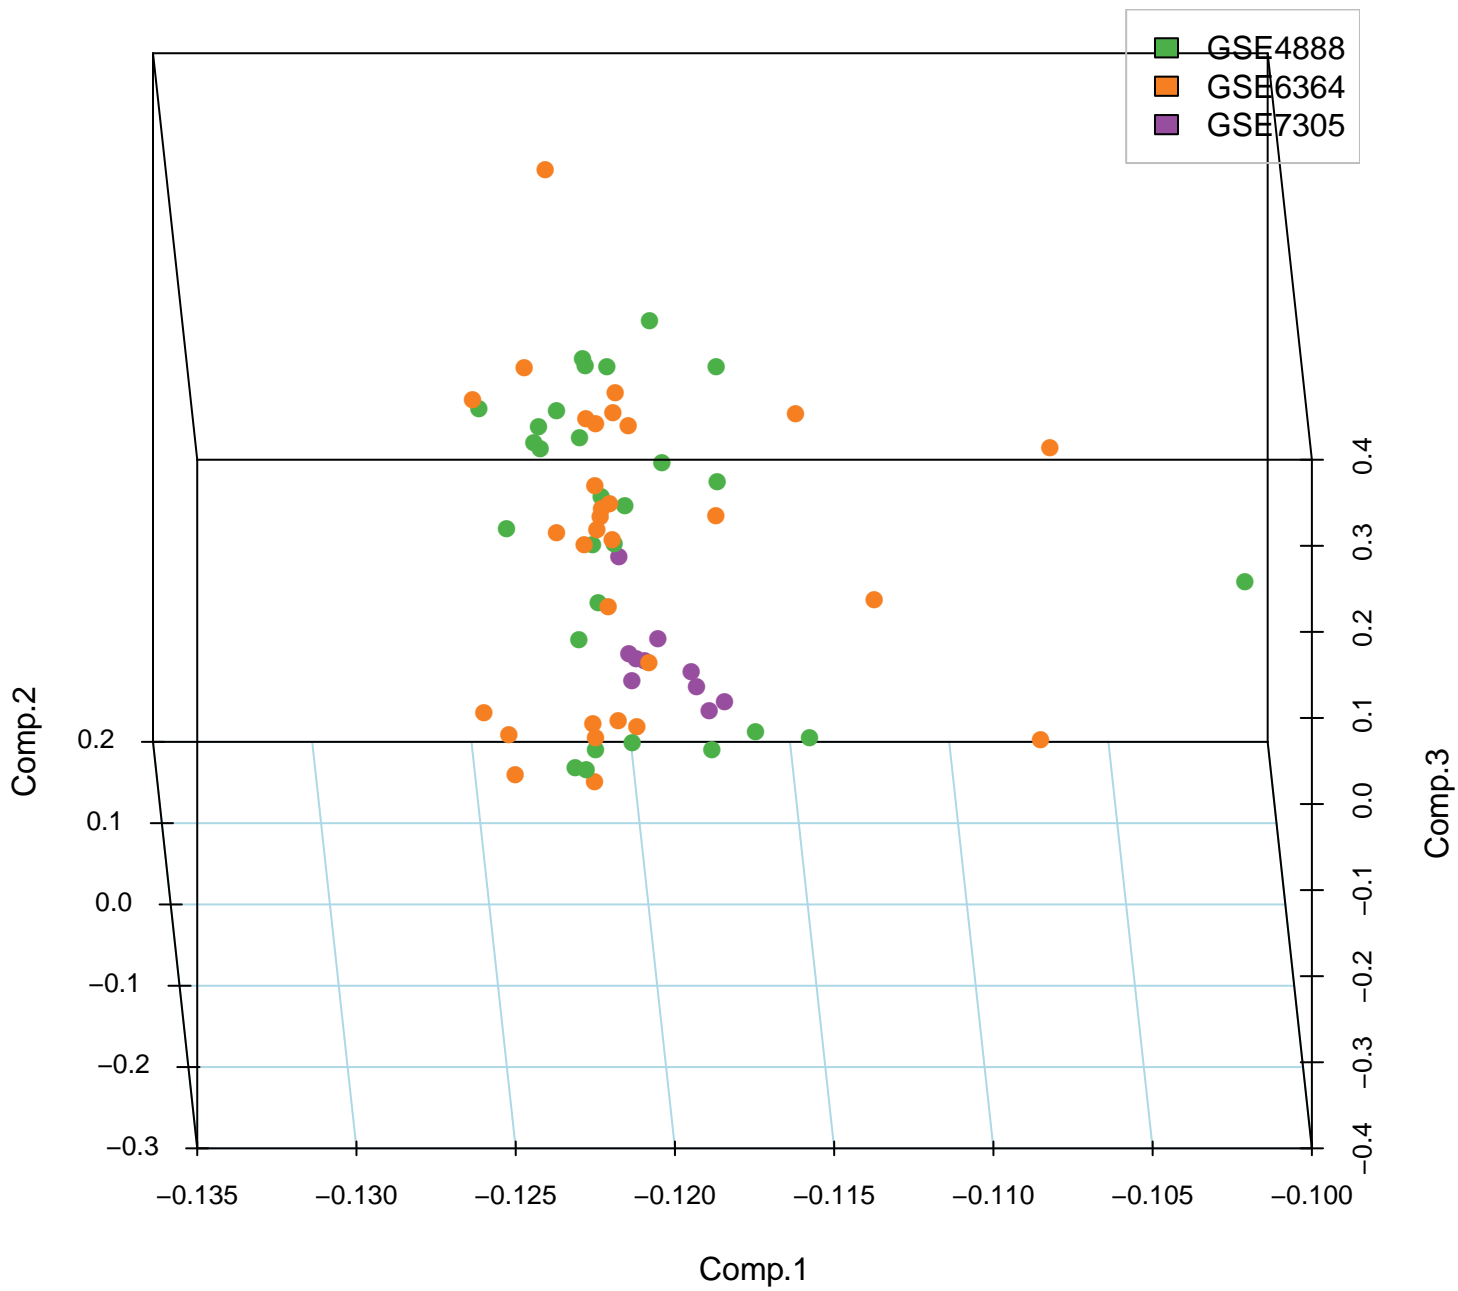

# PCA

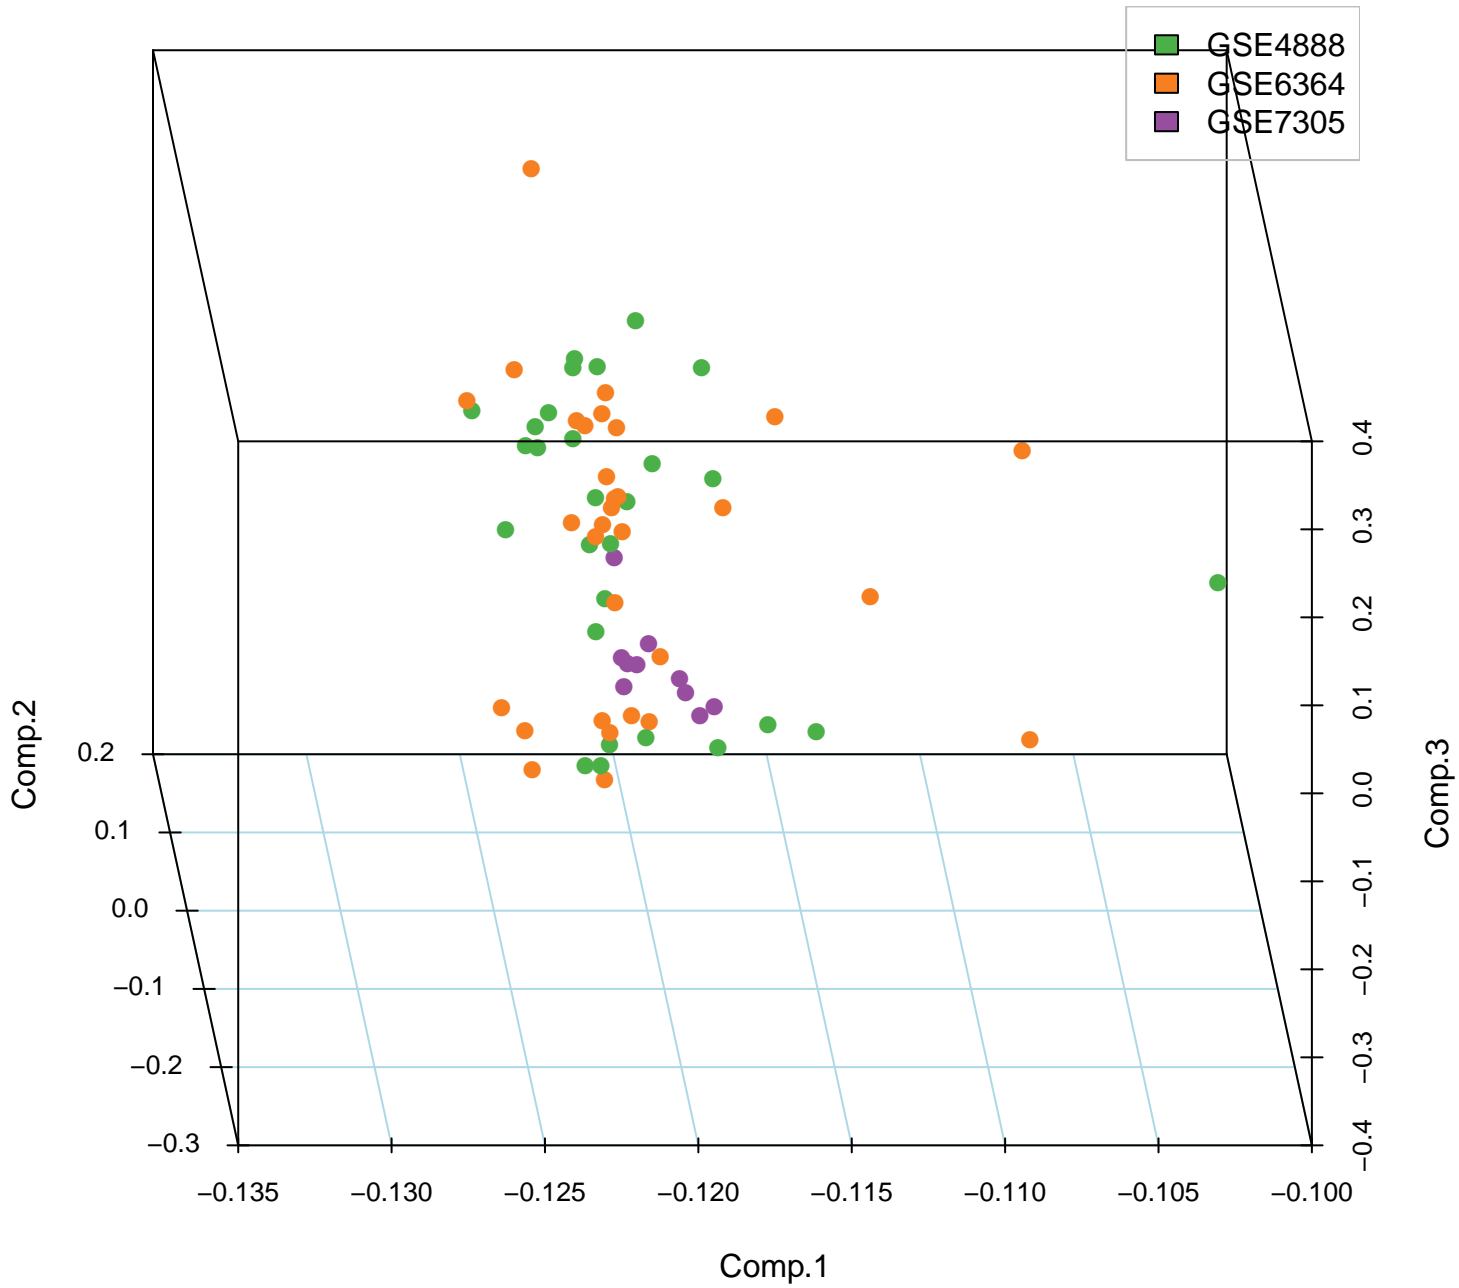

# PCA

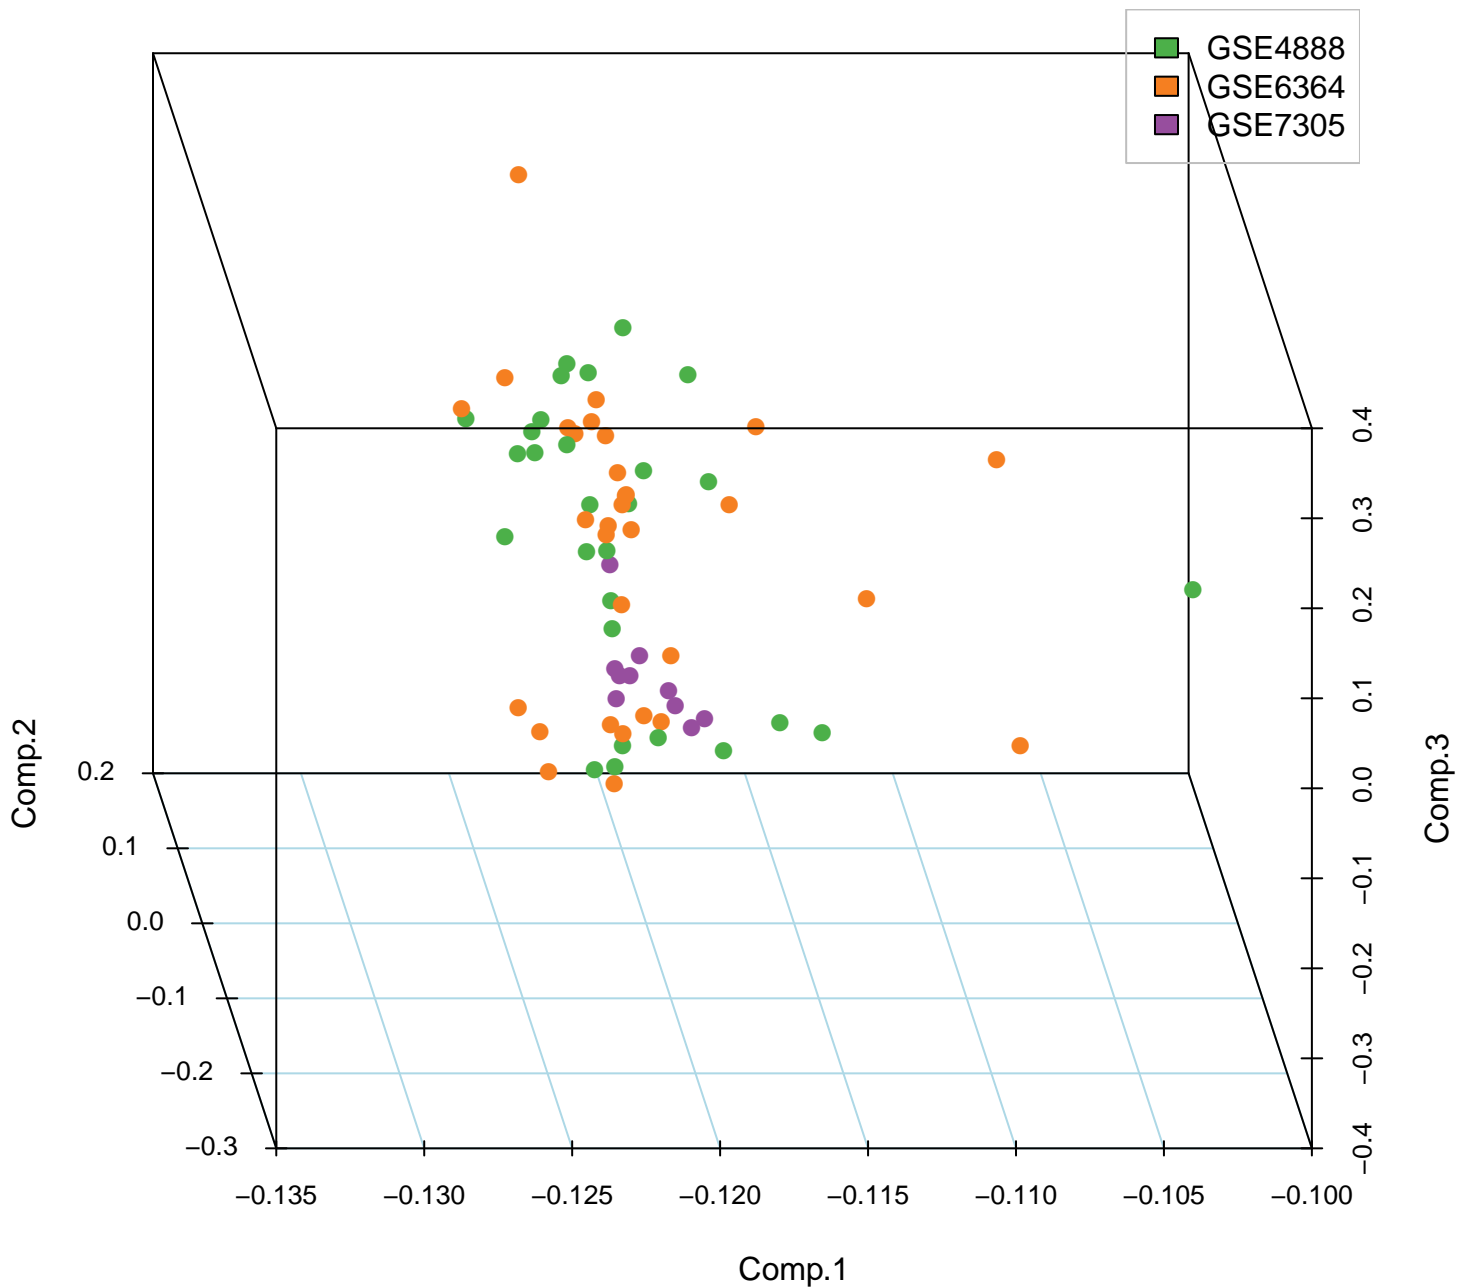

# PCA



# PCA





# PCA

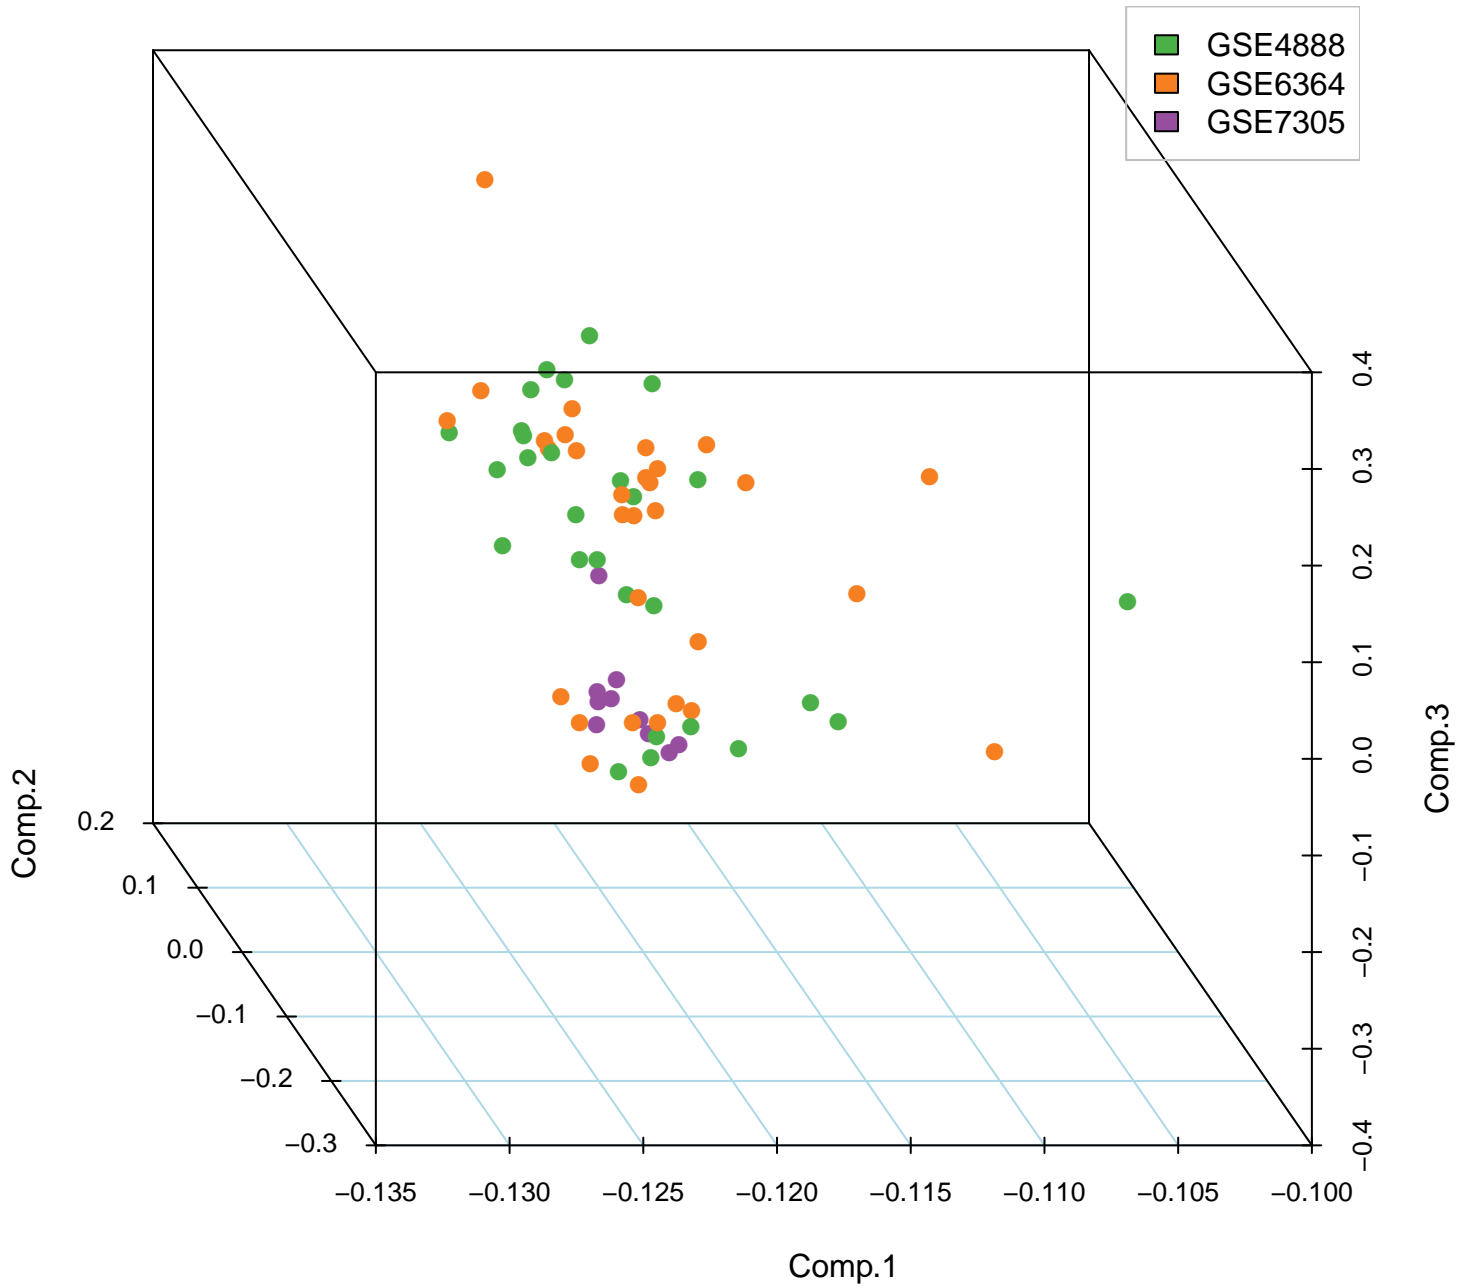

# PCA

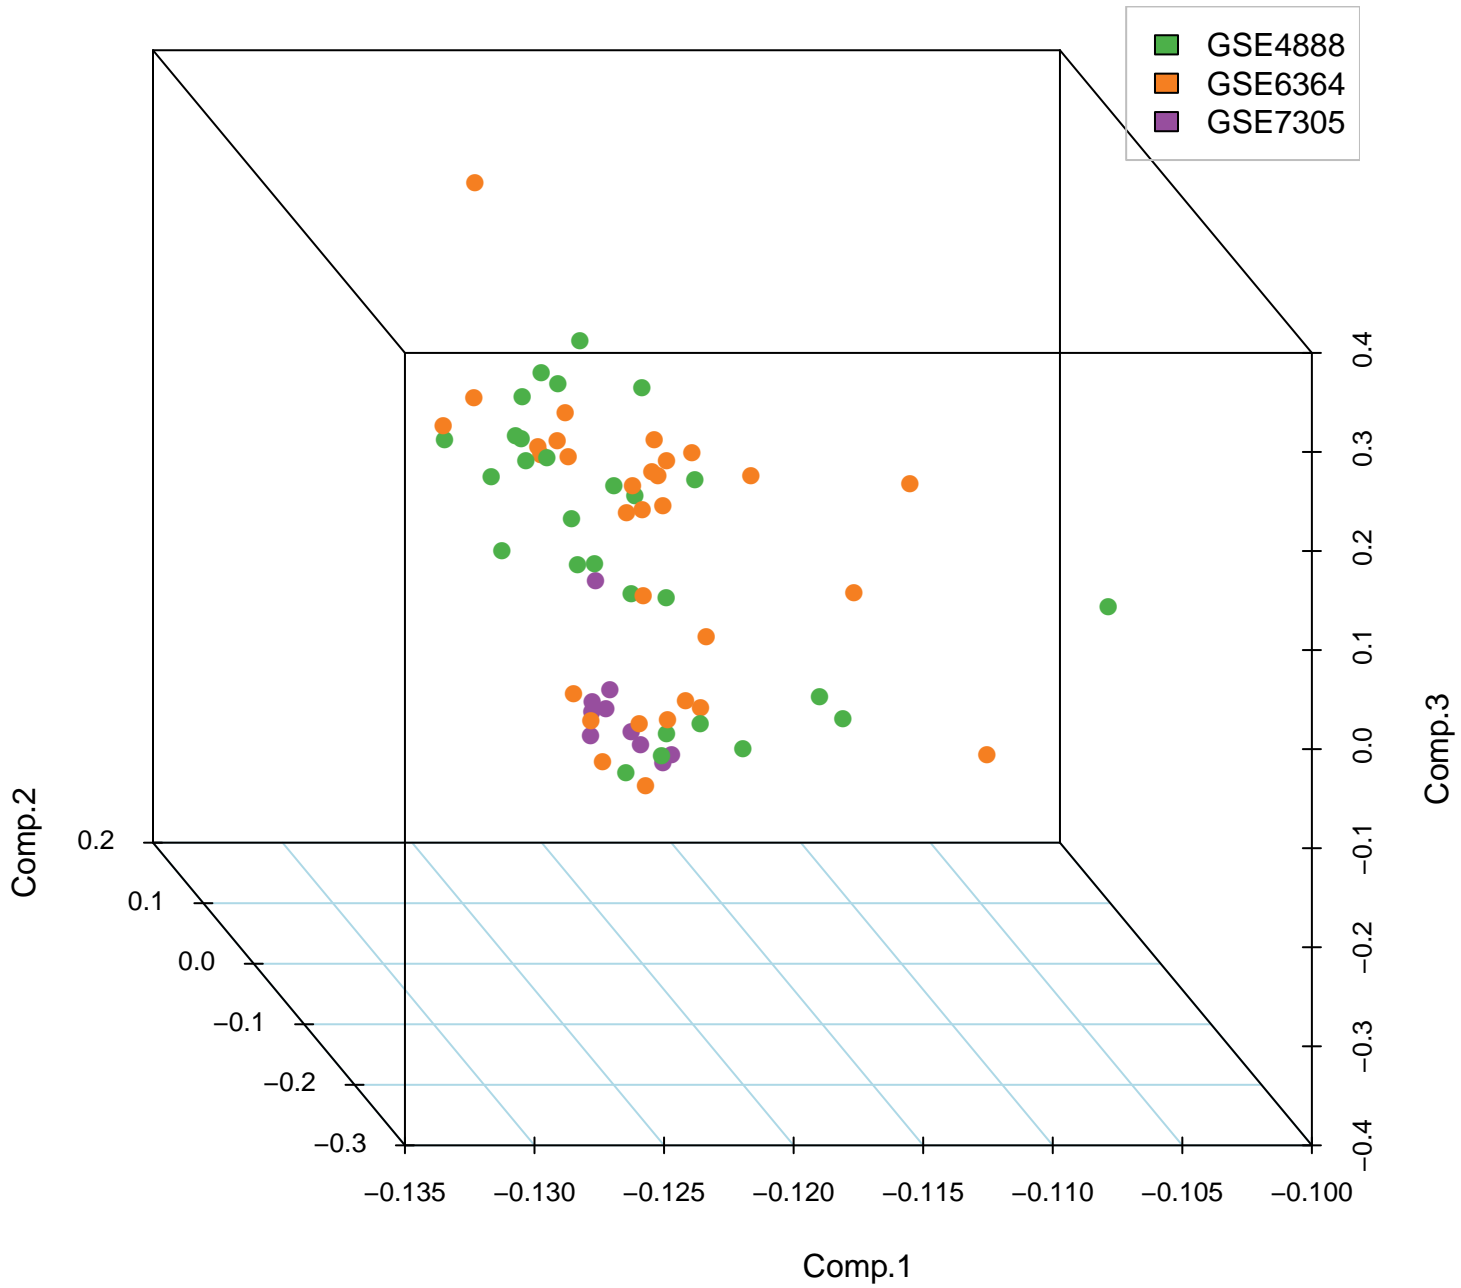

# PCA

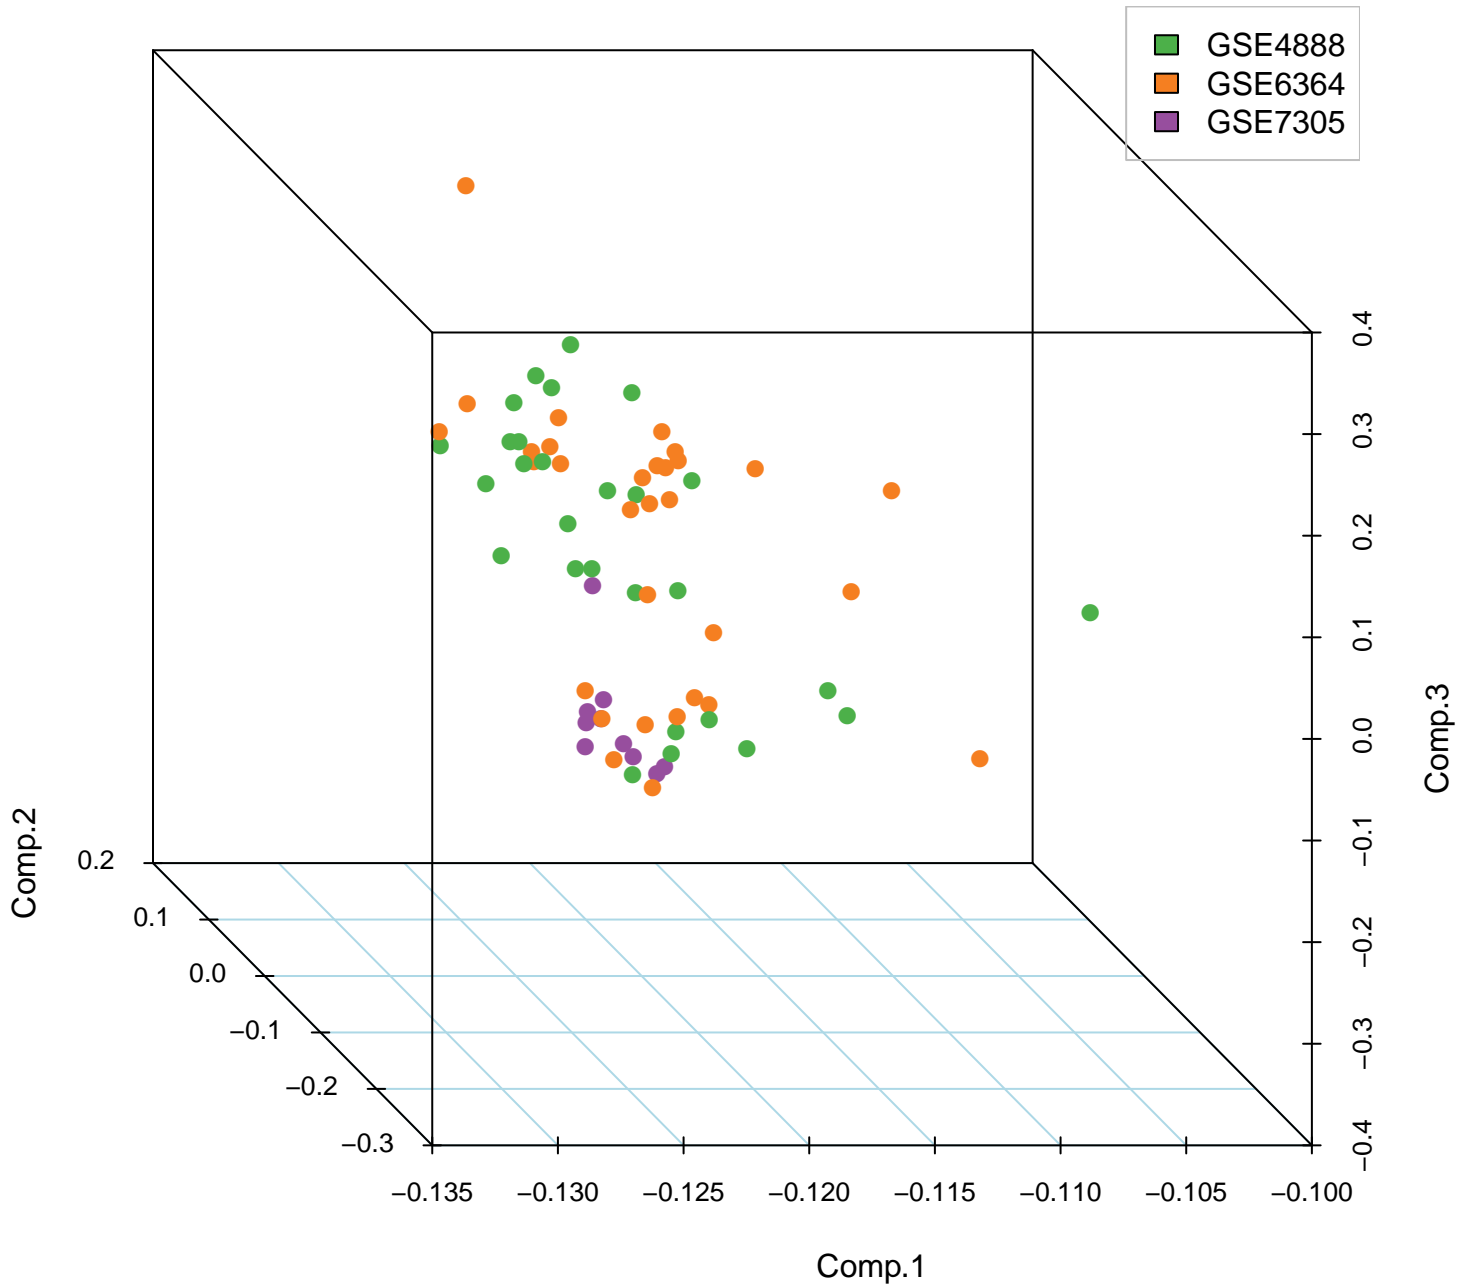

# PCA

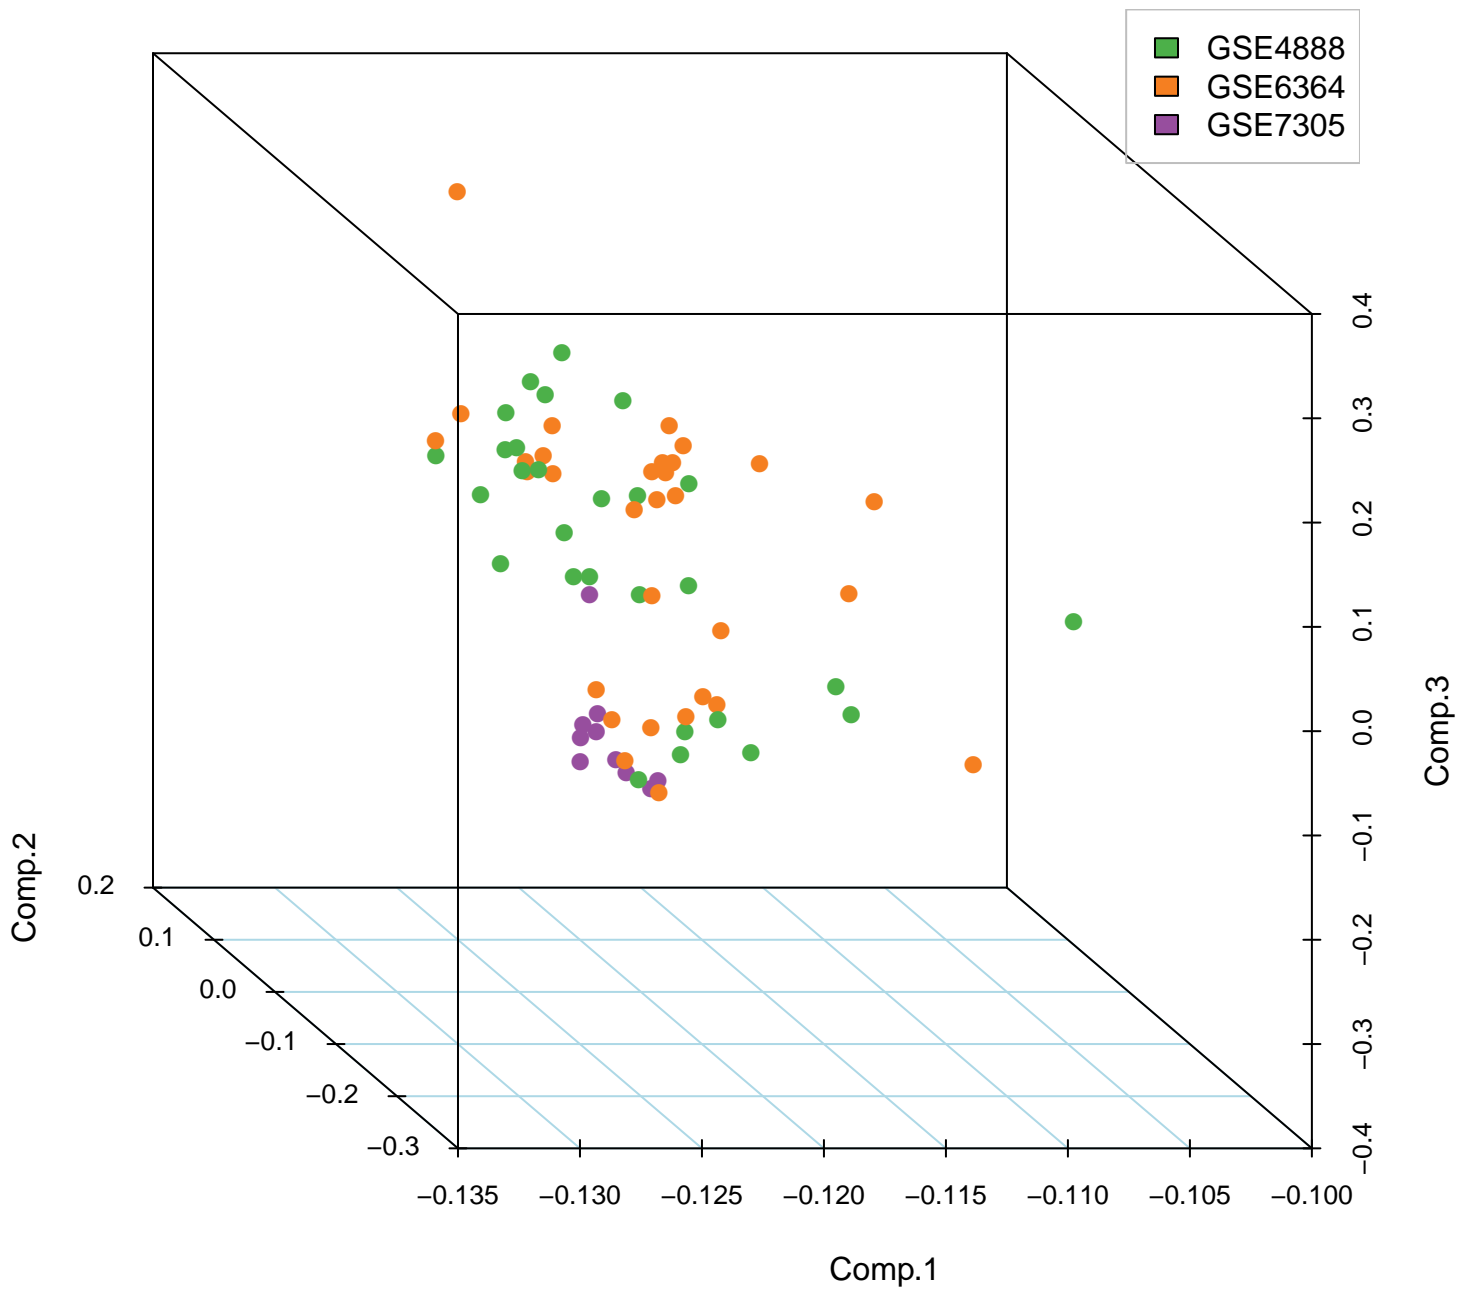

# PCA



# PCA

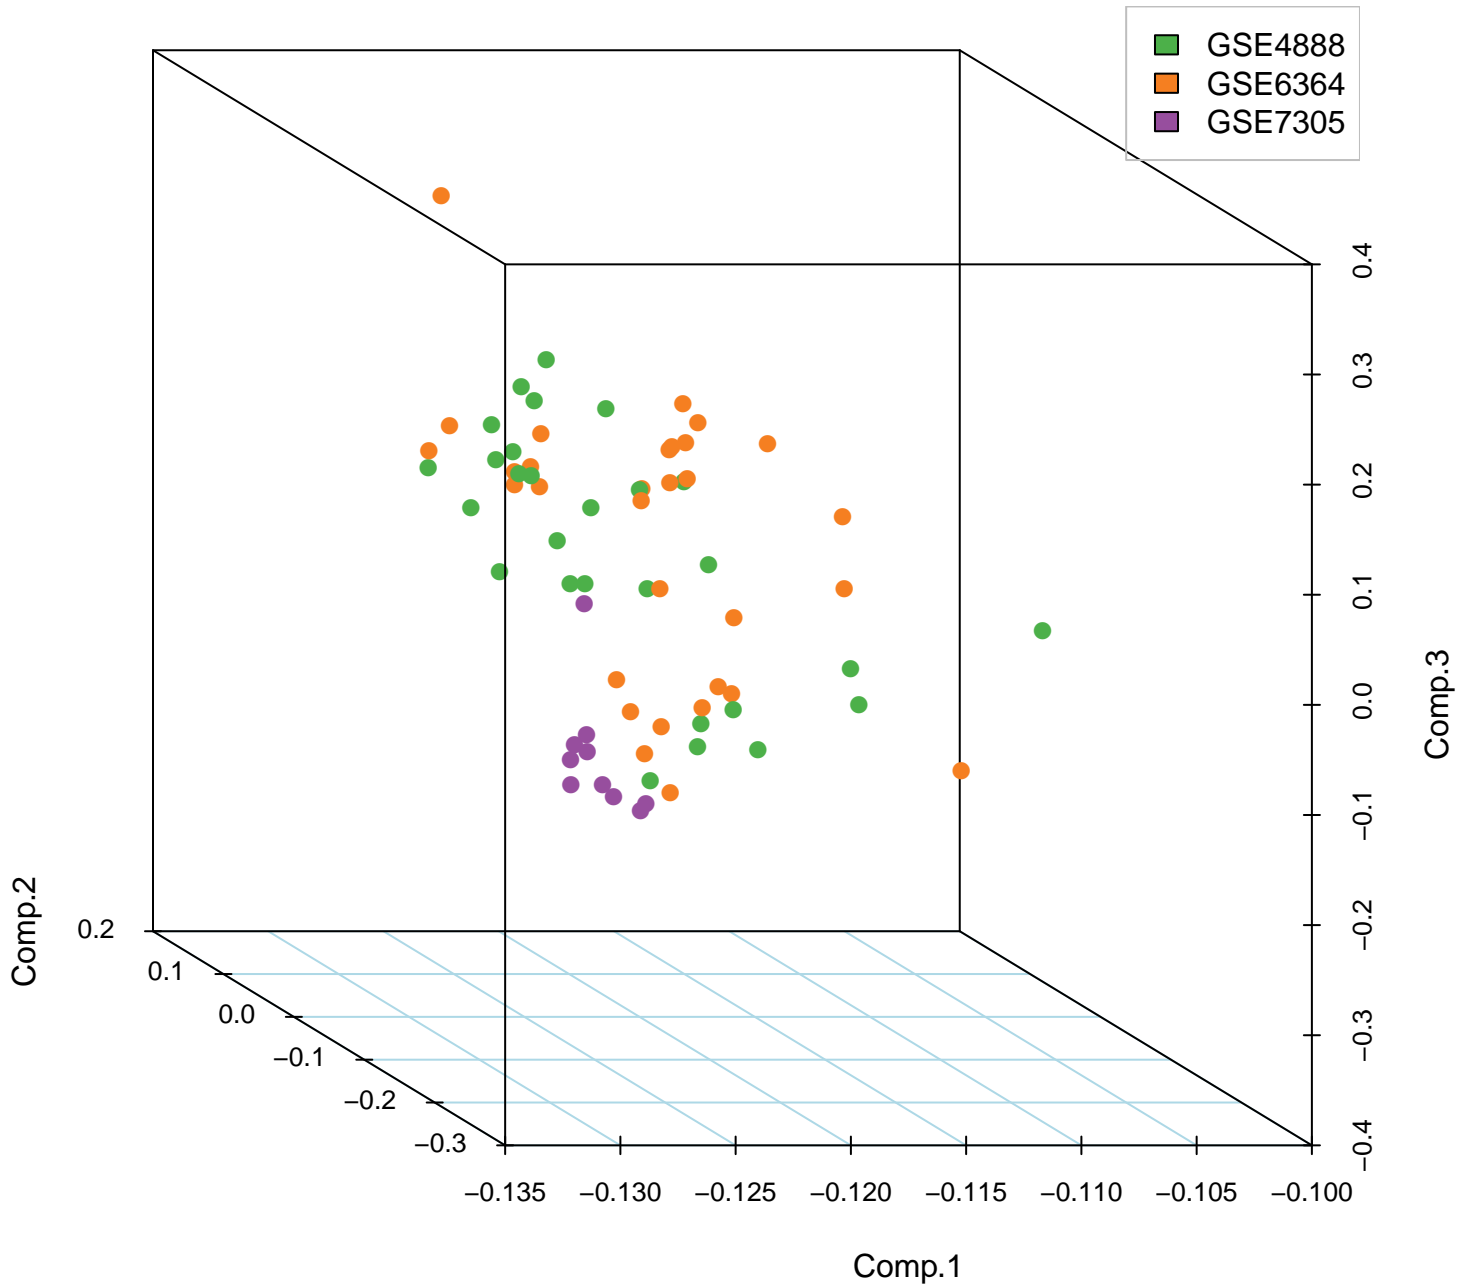

# PCA



# PCA

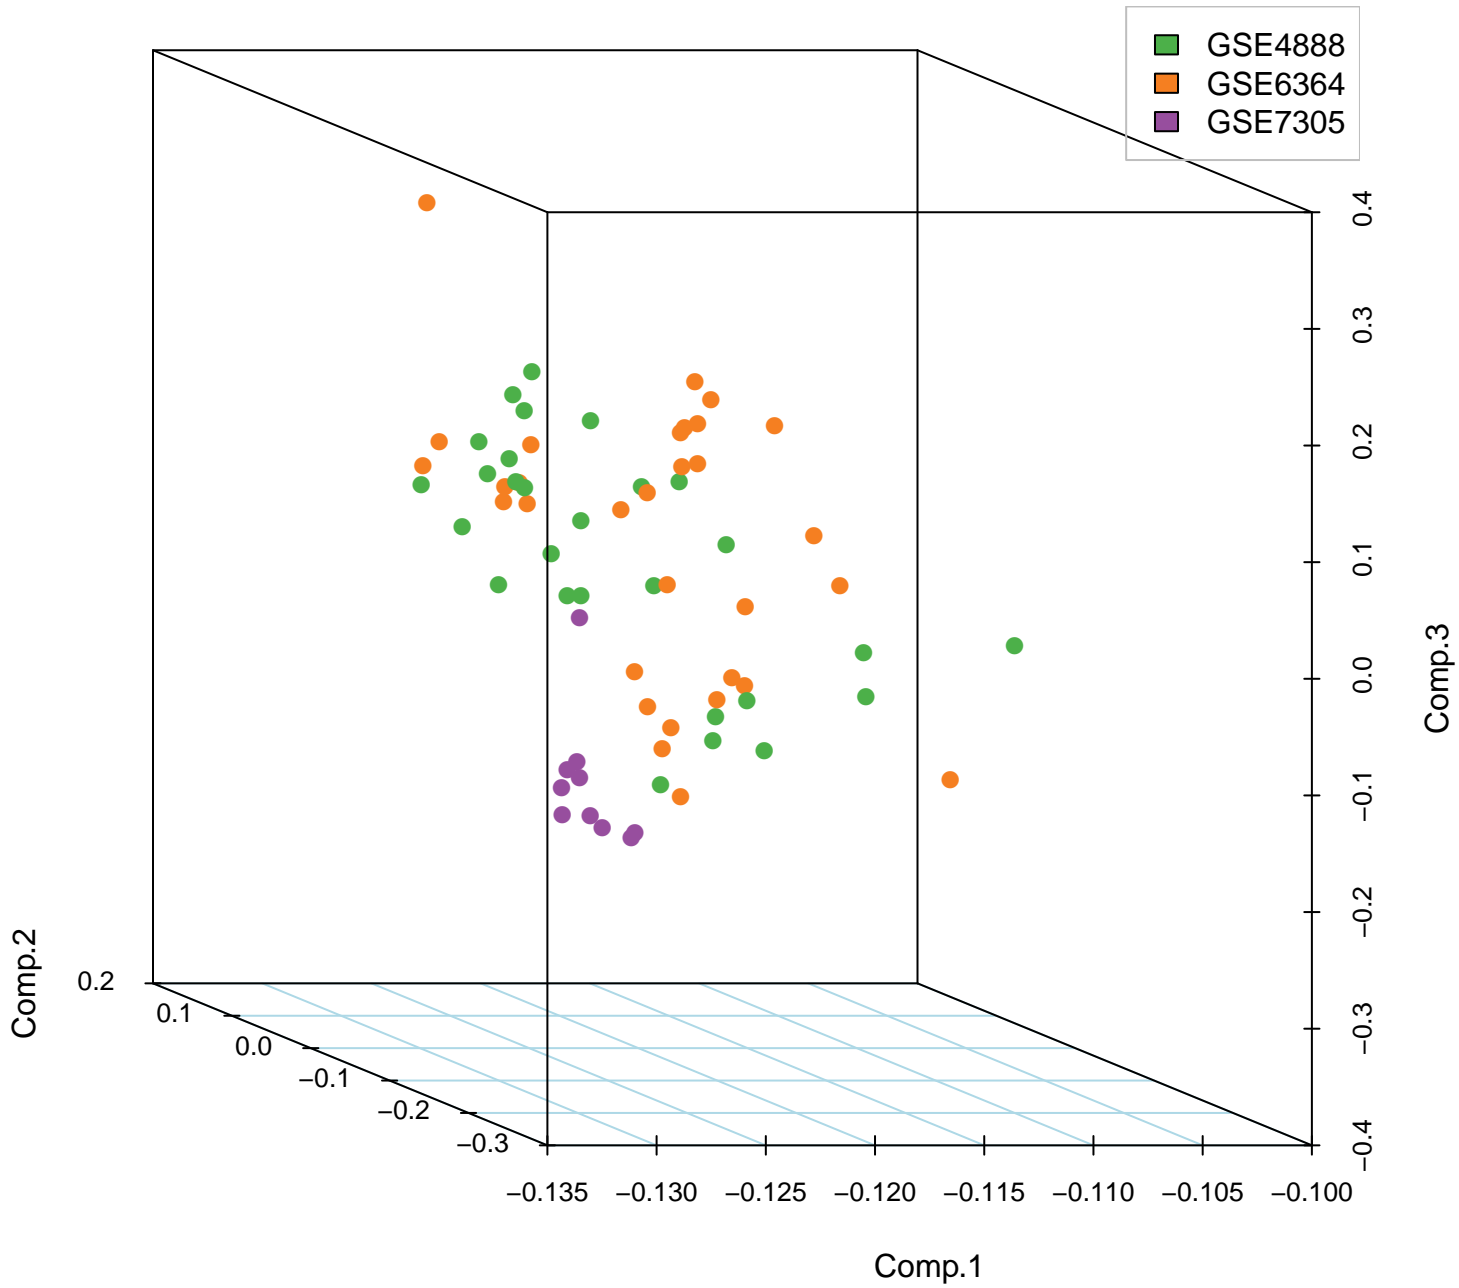



# PCA

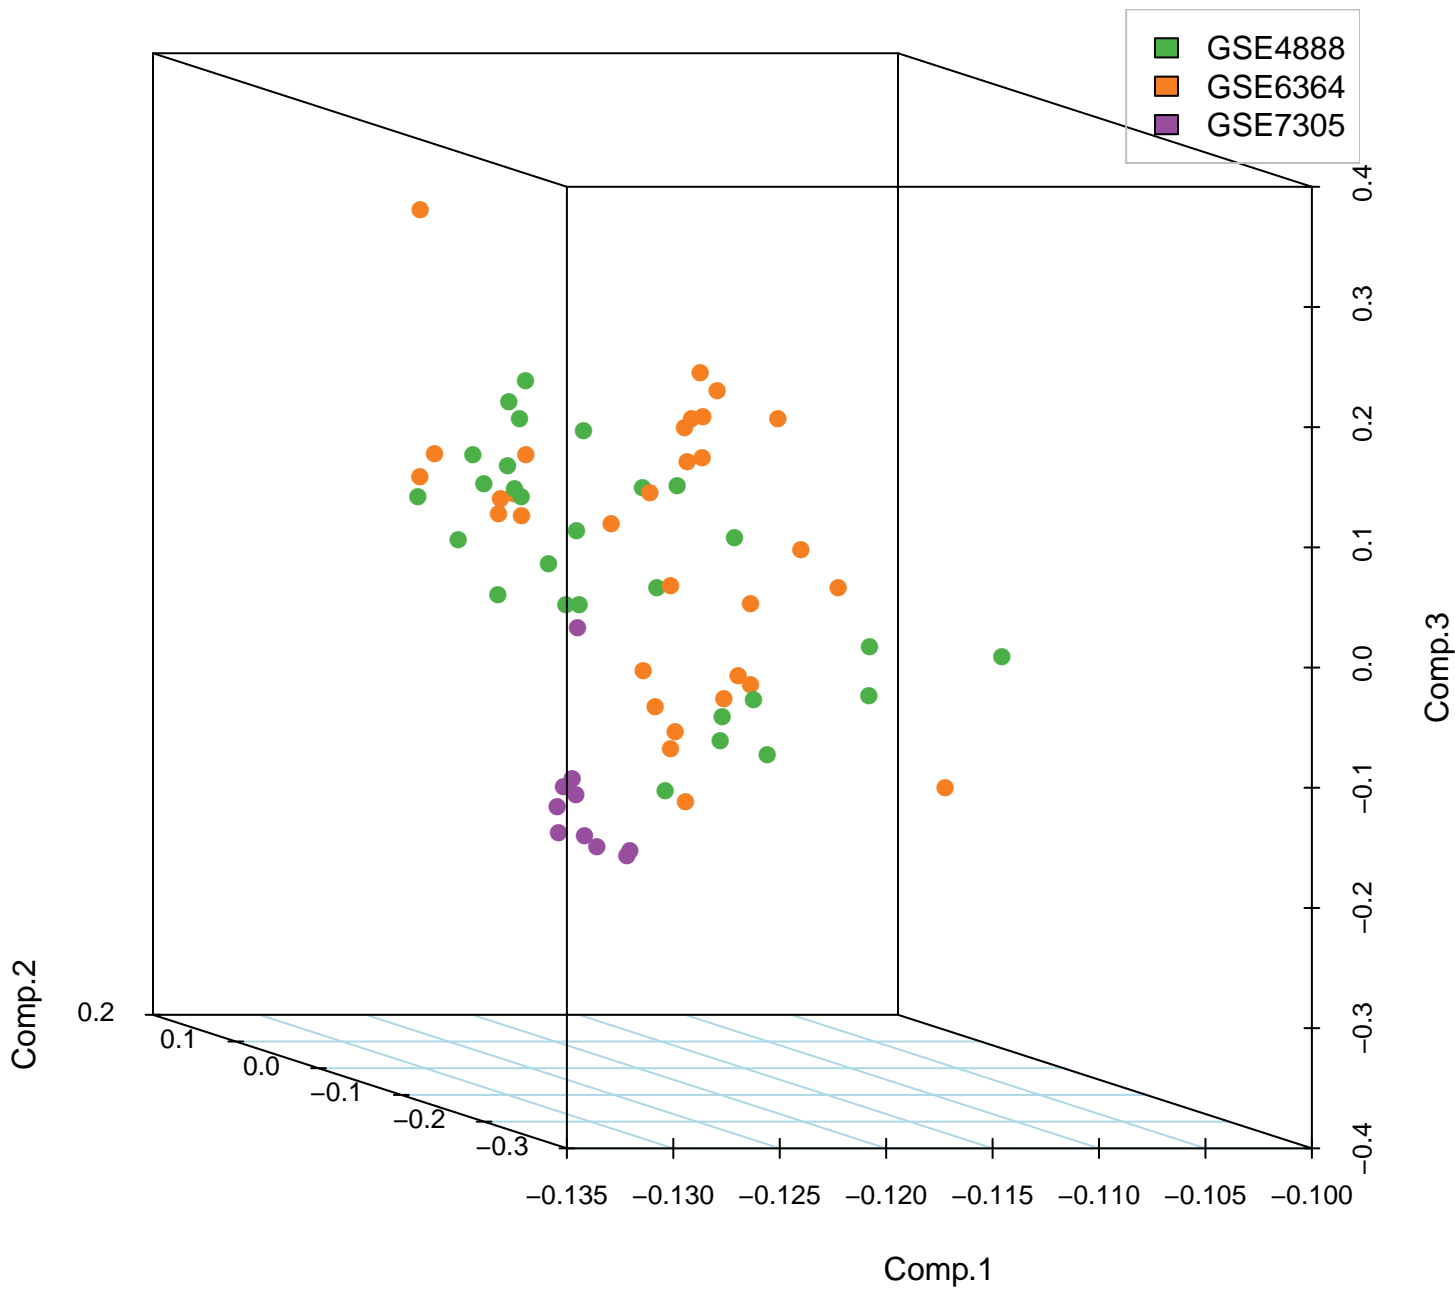

# PCA

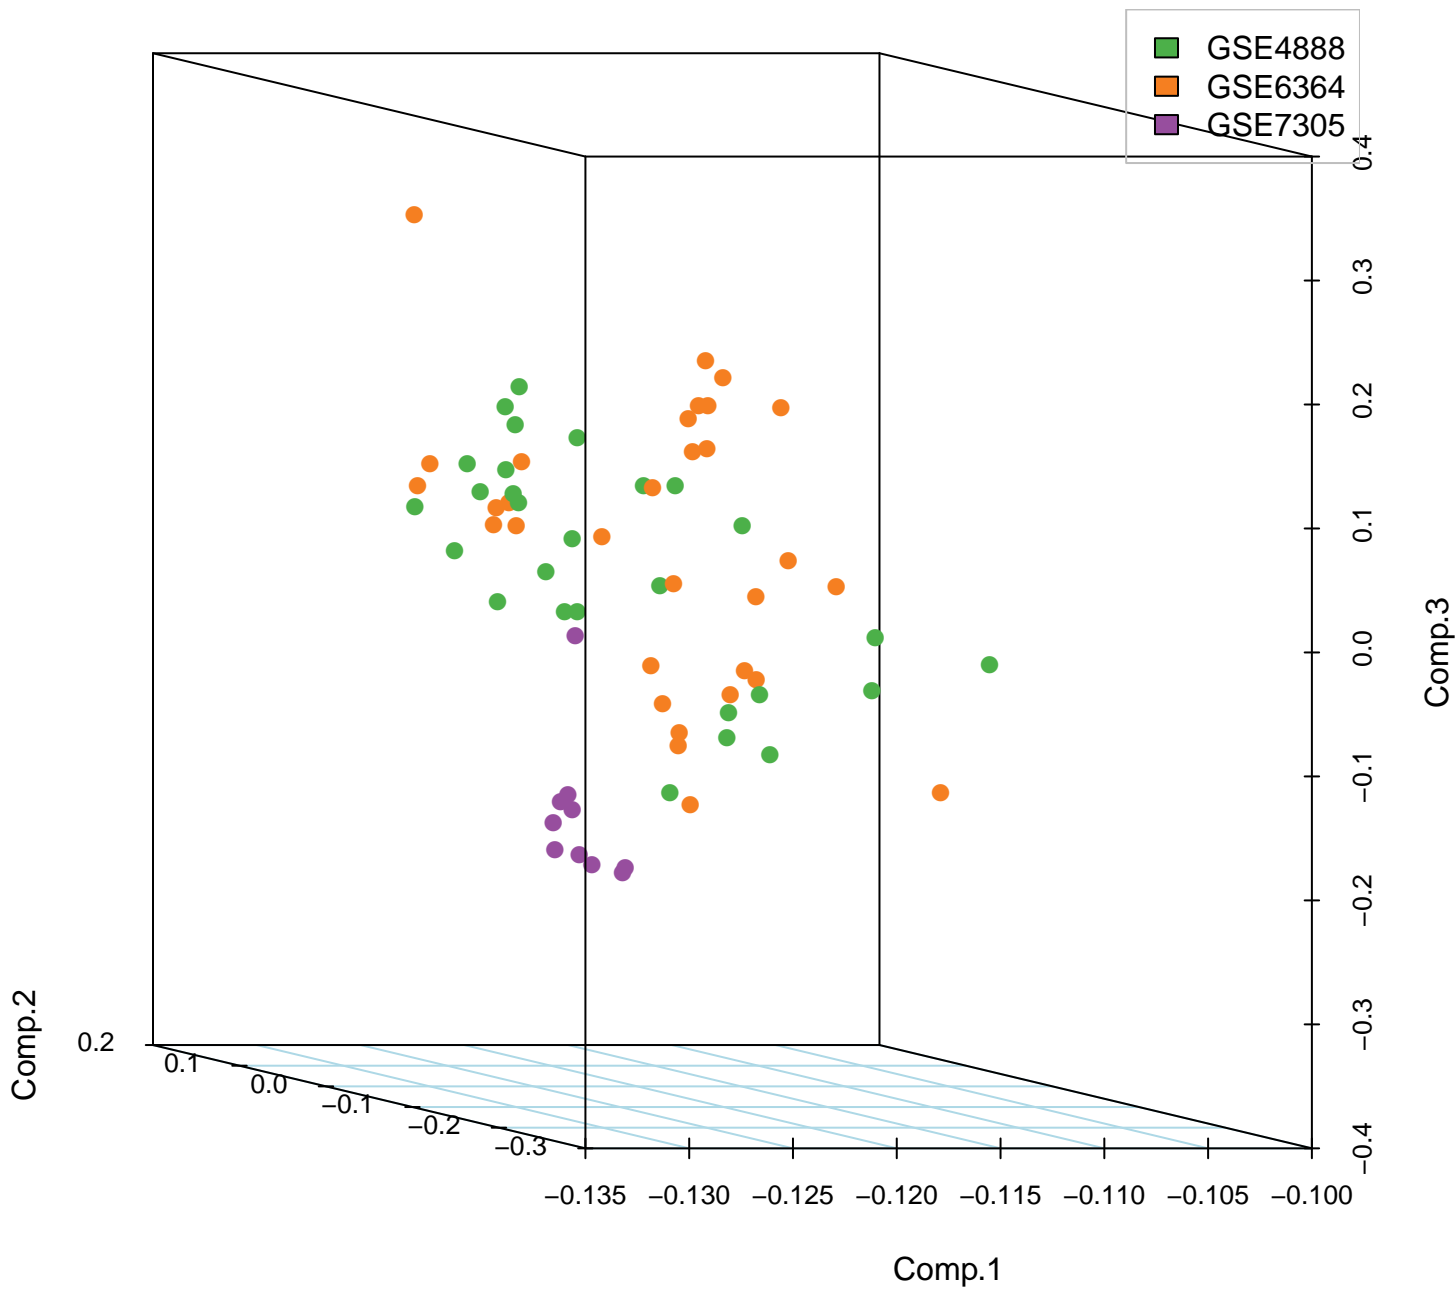





# PCA

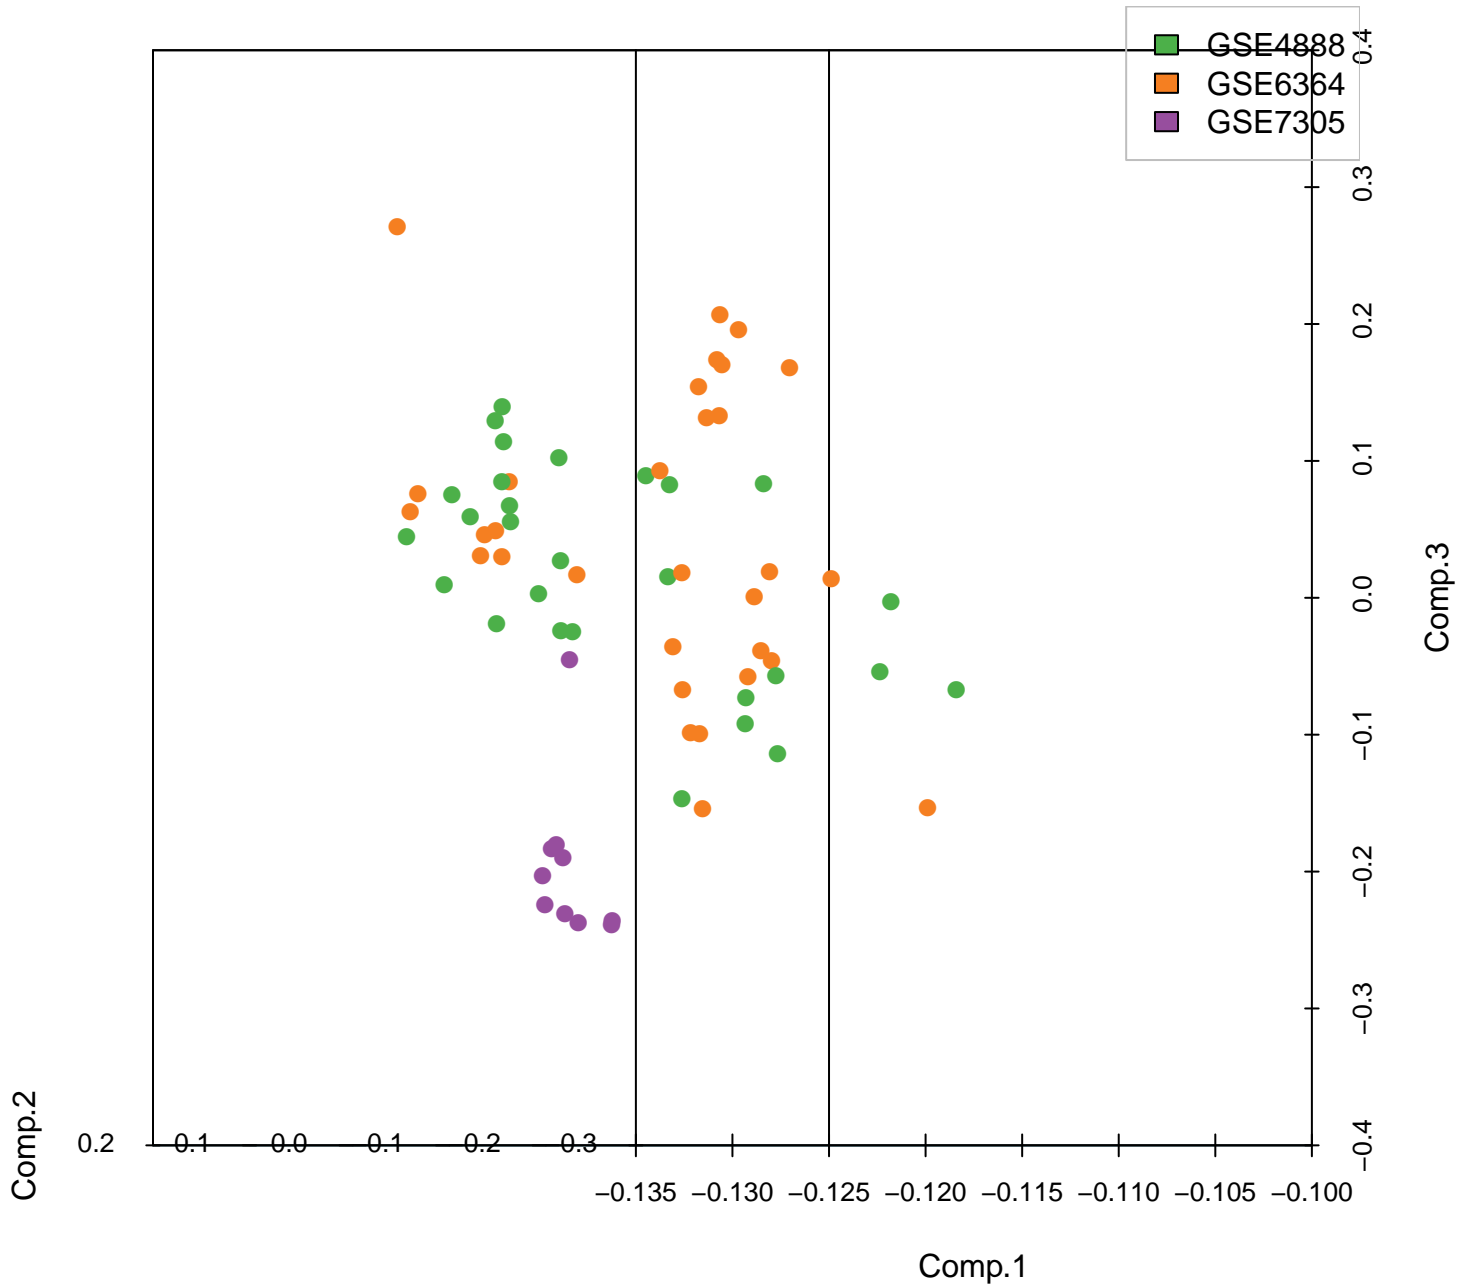



# PCA

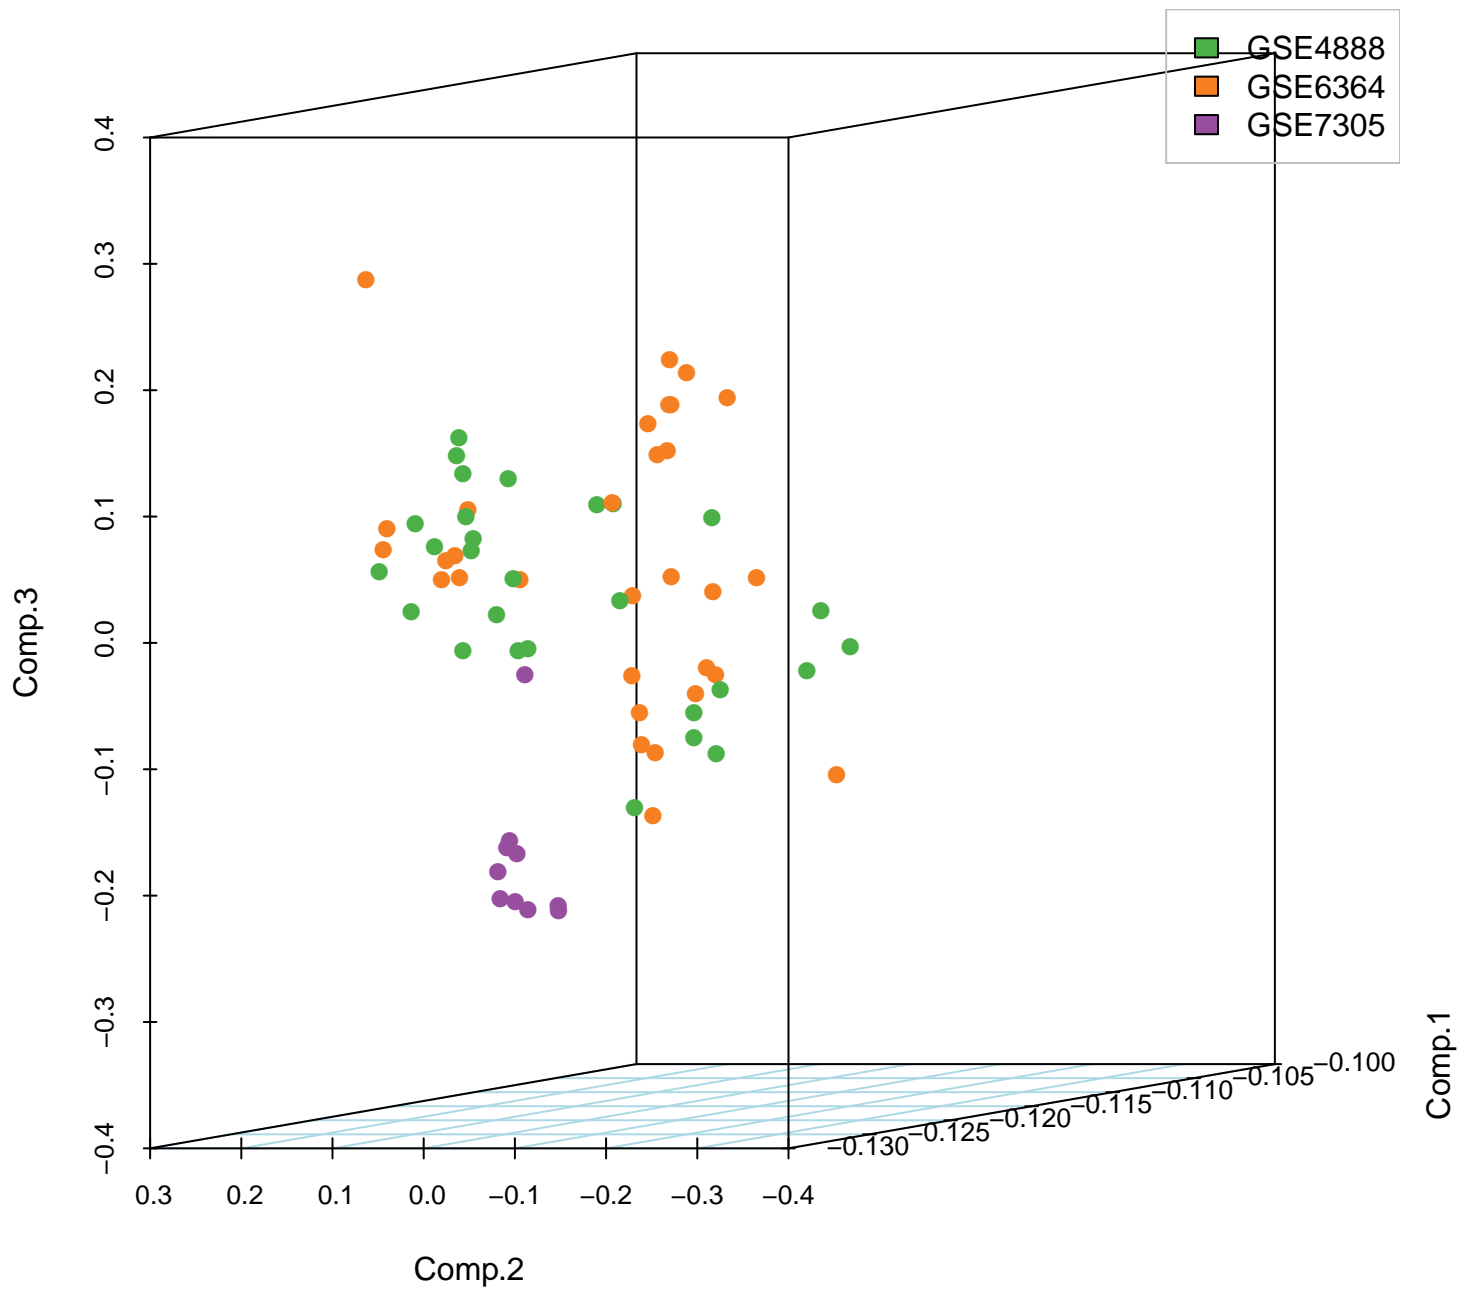

# PCA

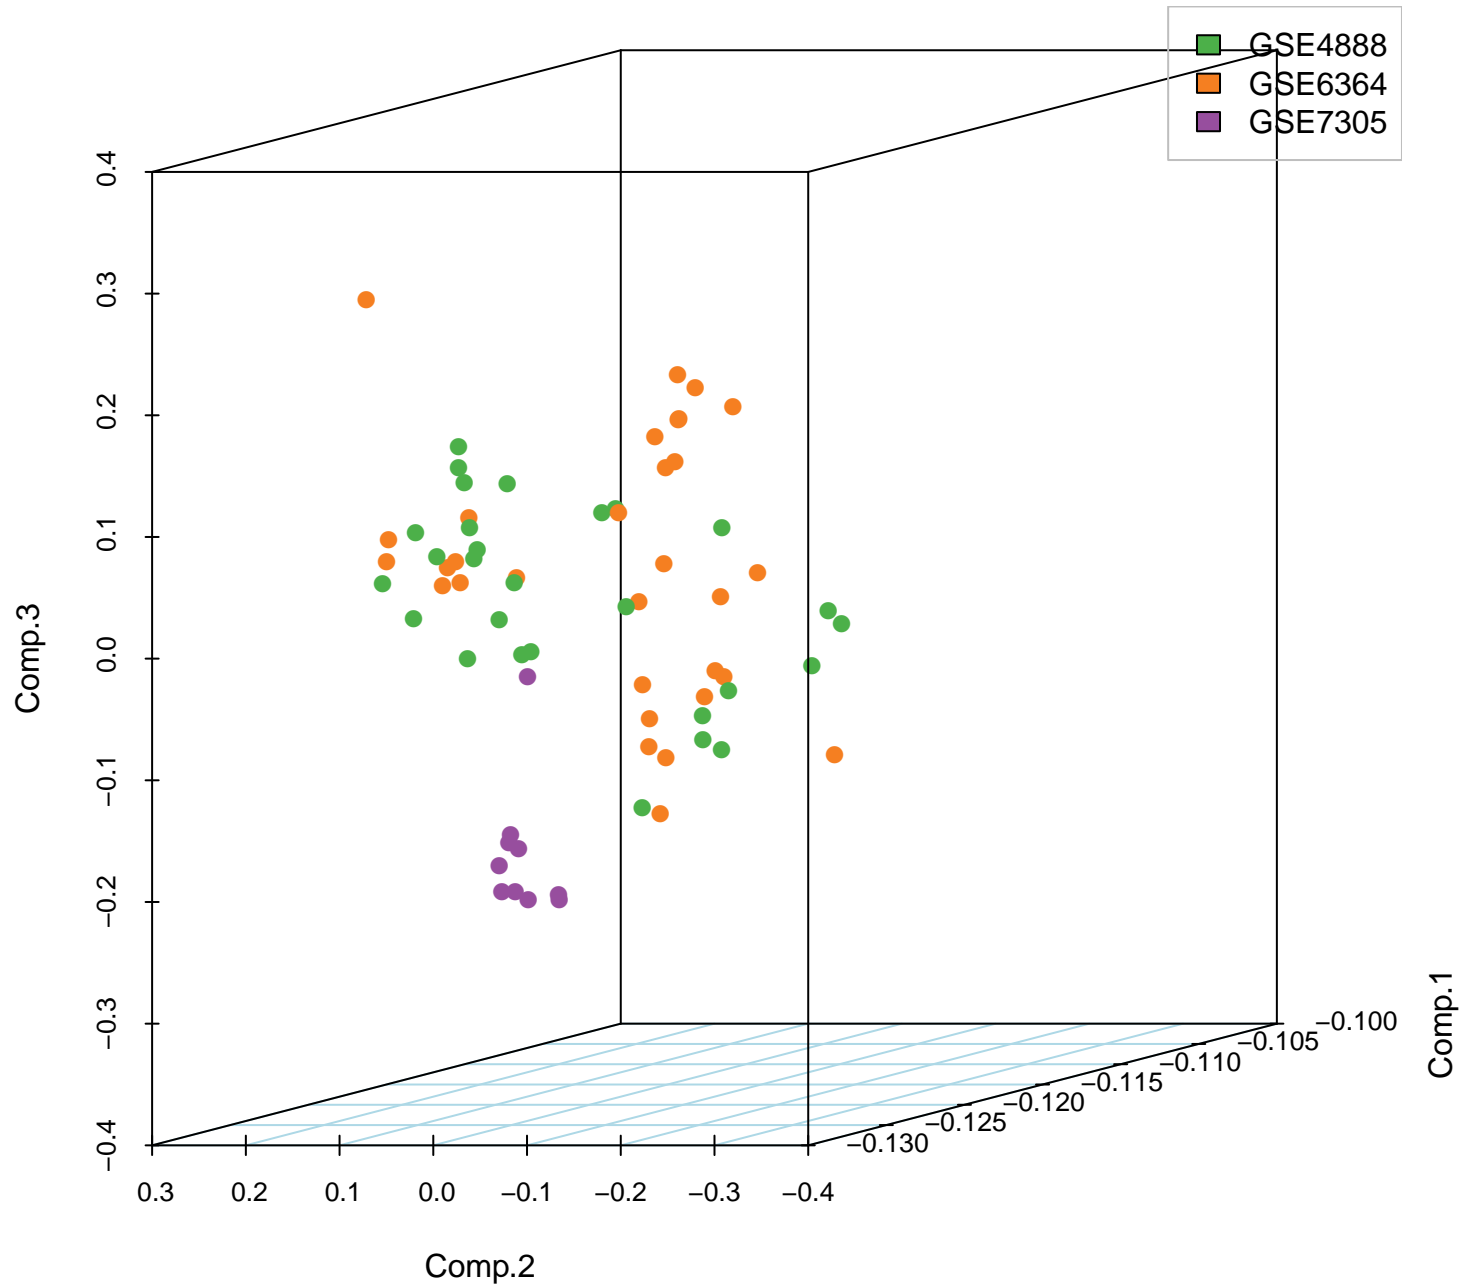



# PCA

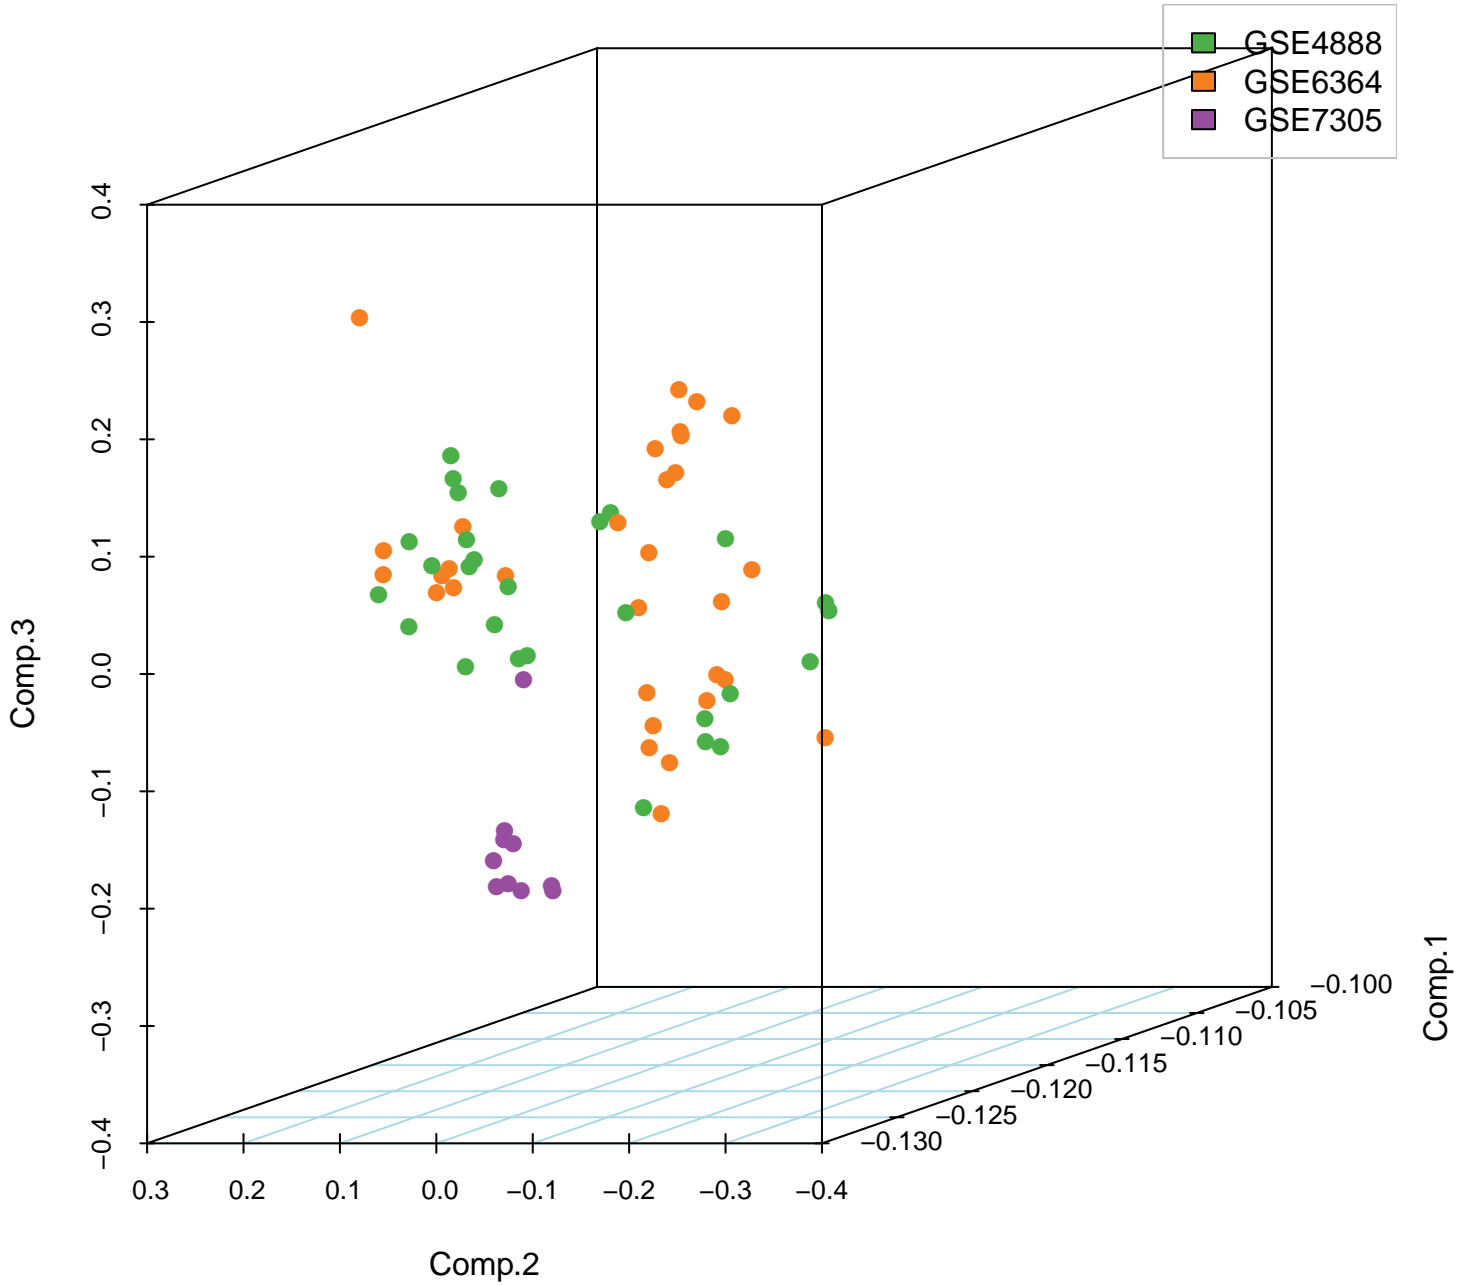

# PCA

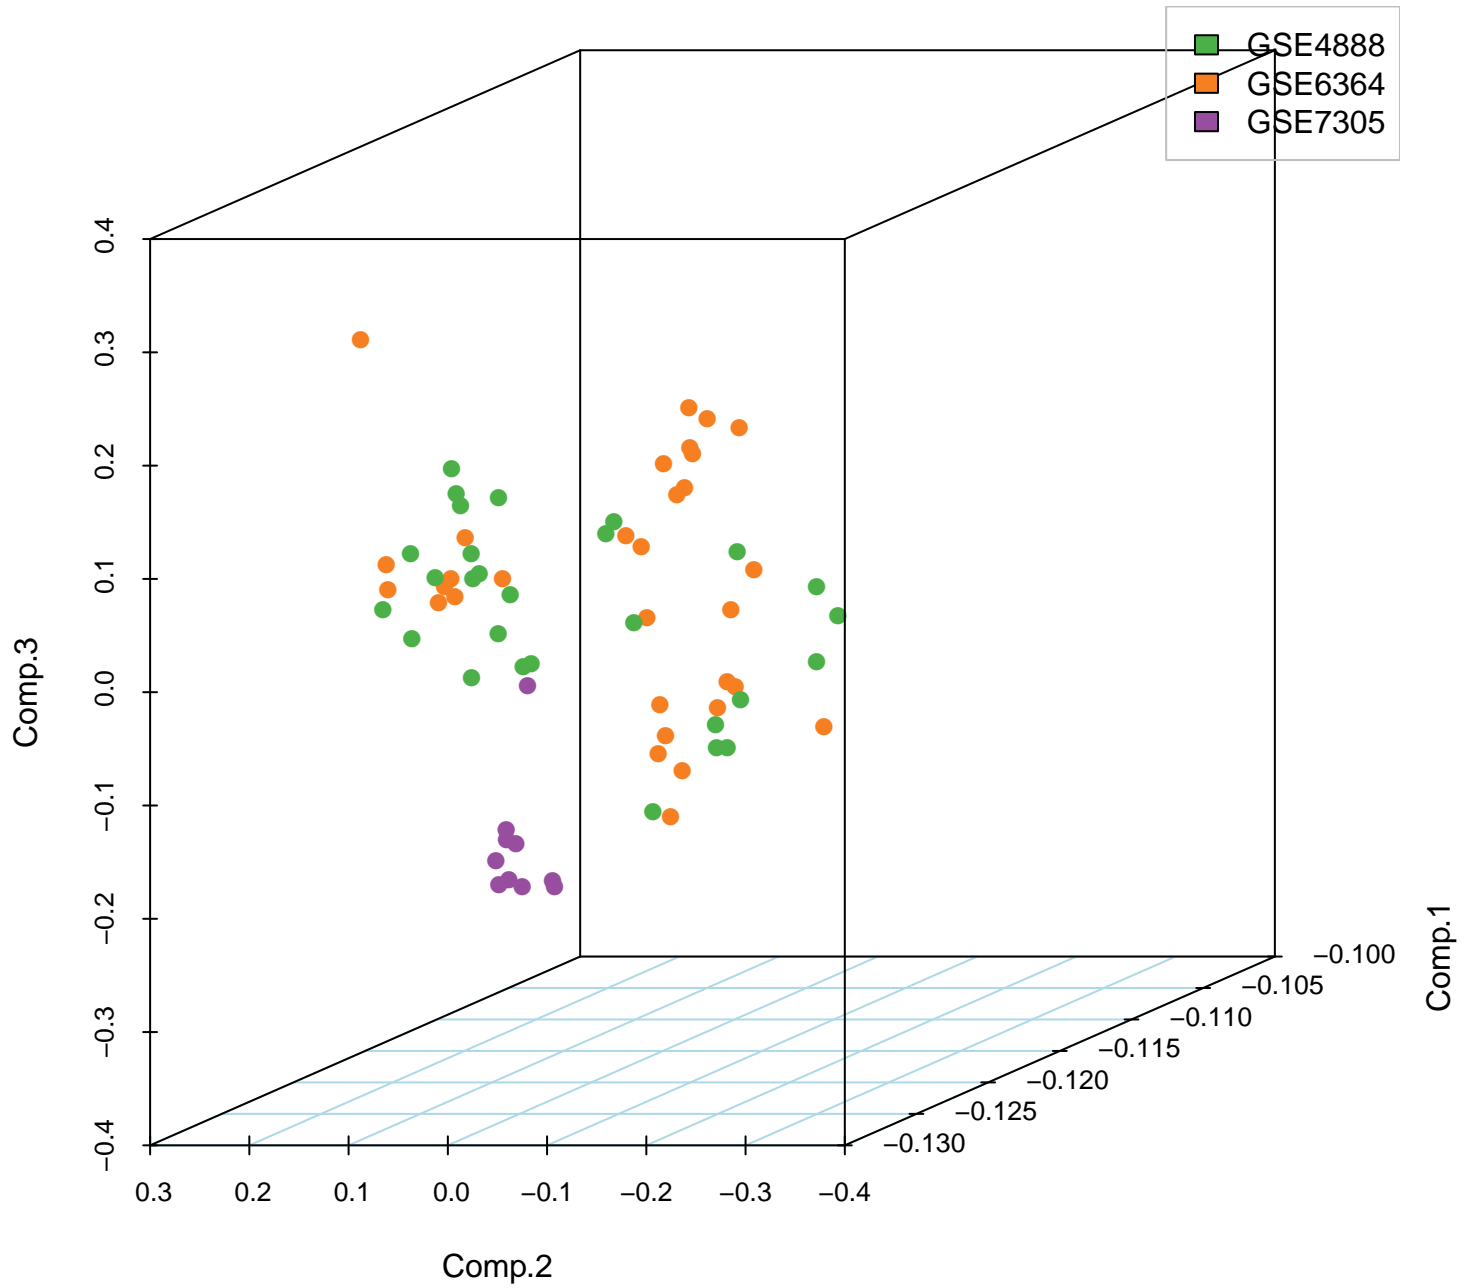

# PCA

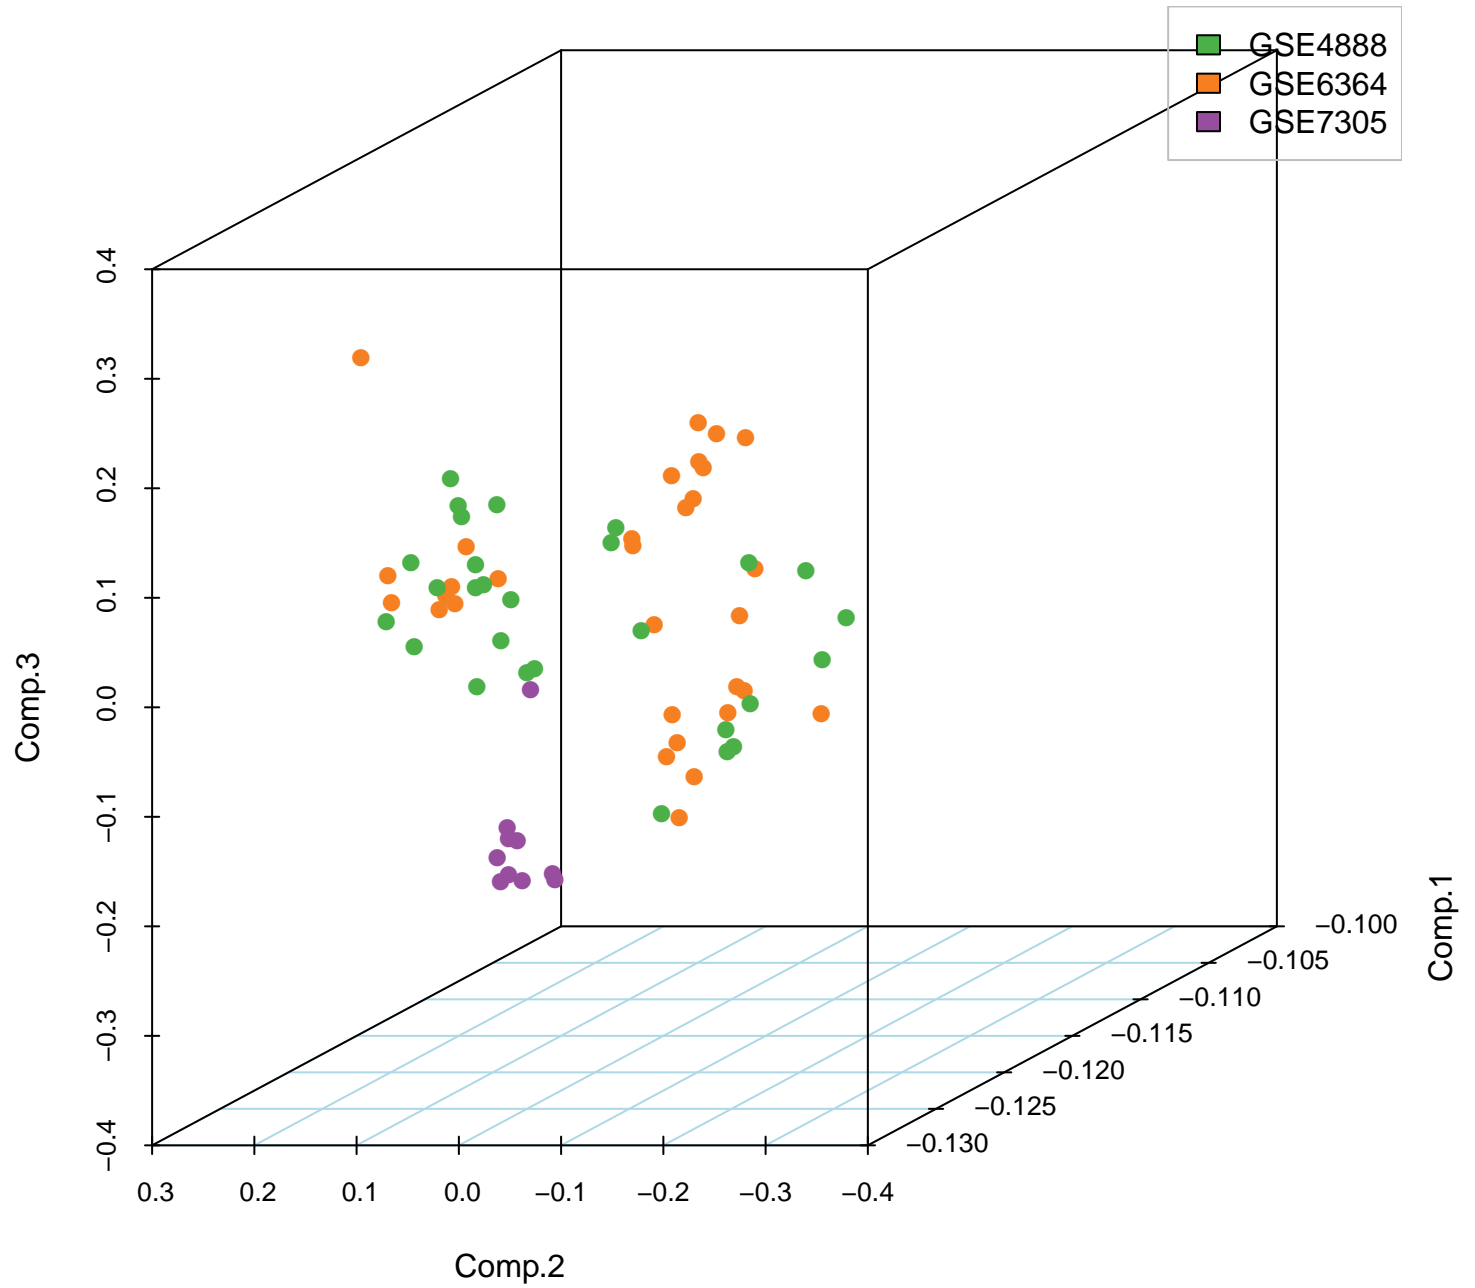

# PCA

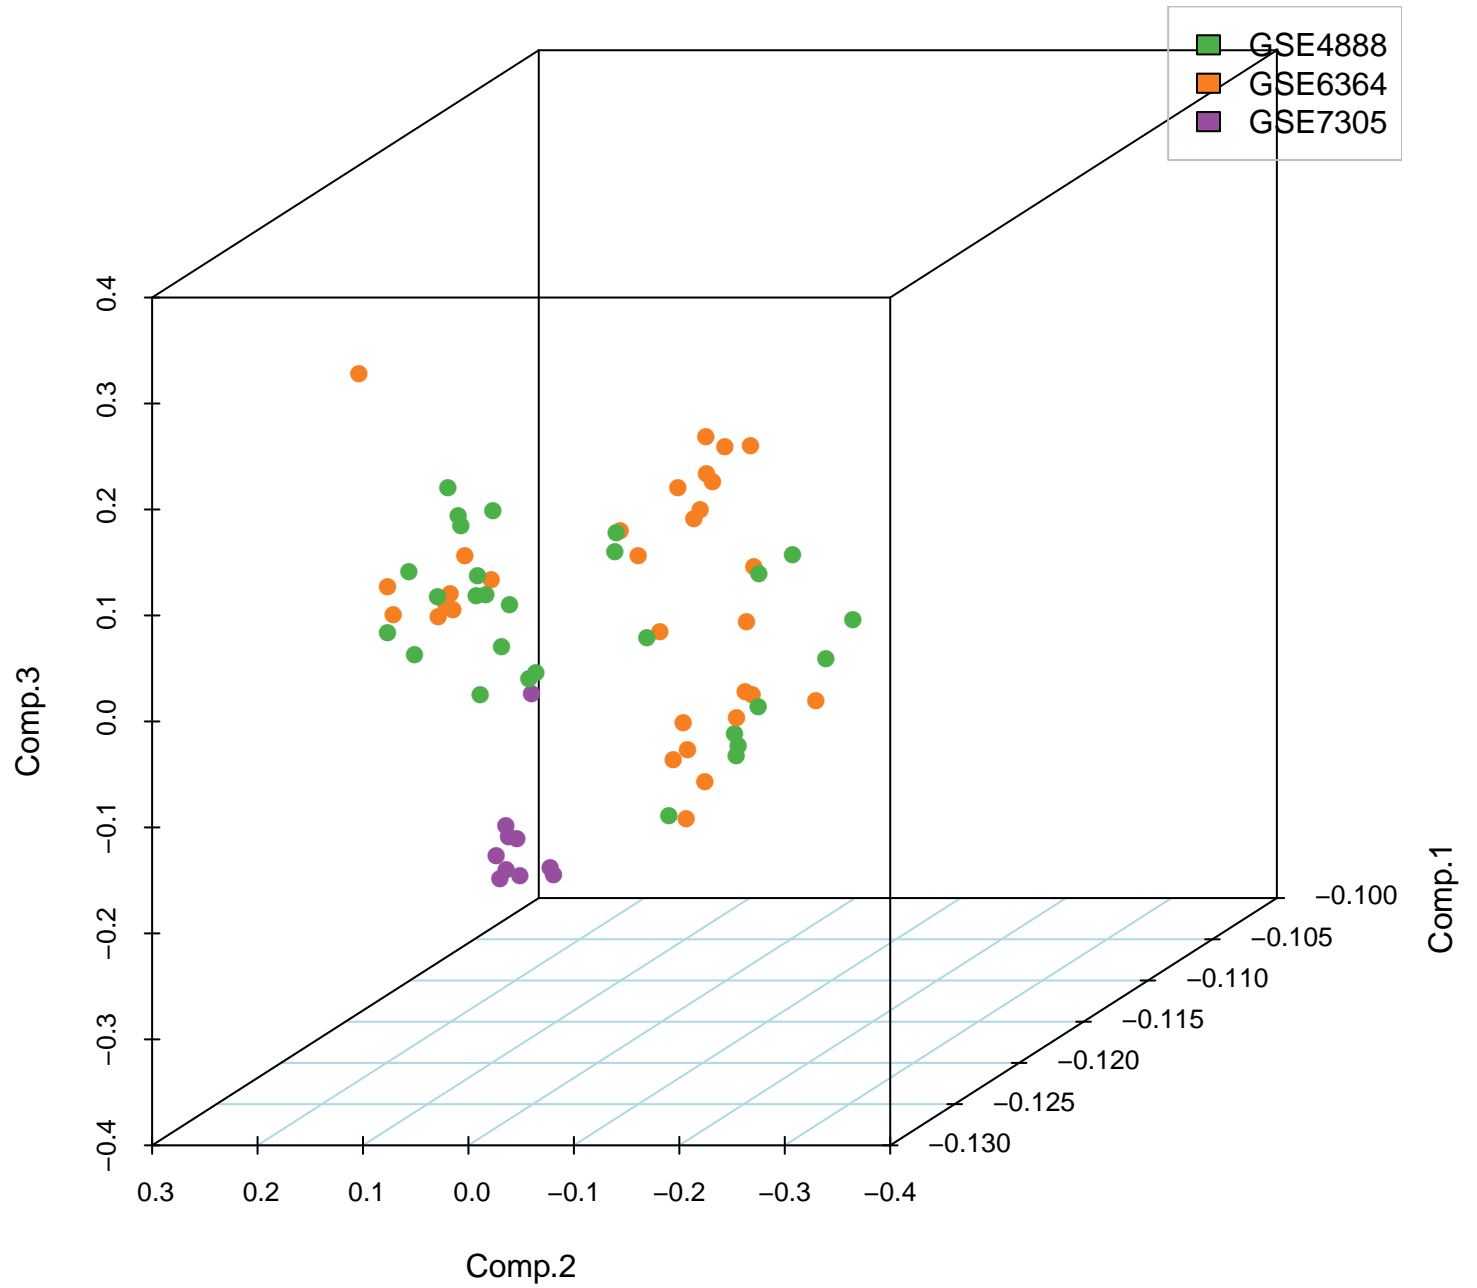

# PCA

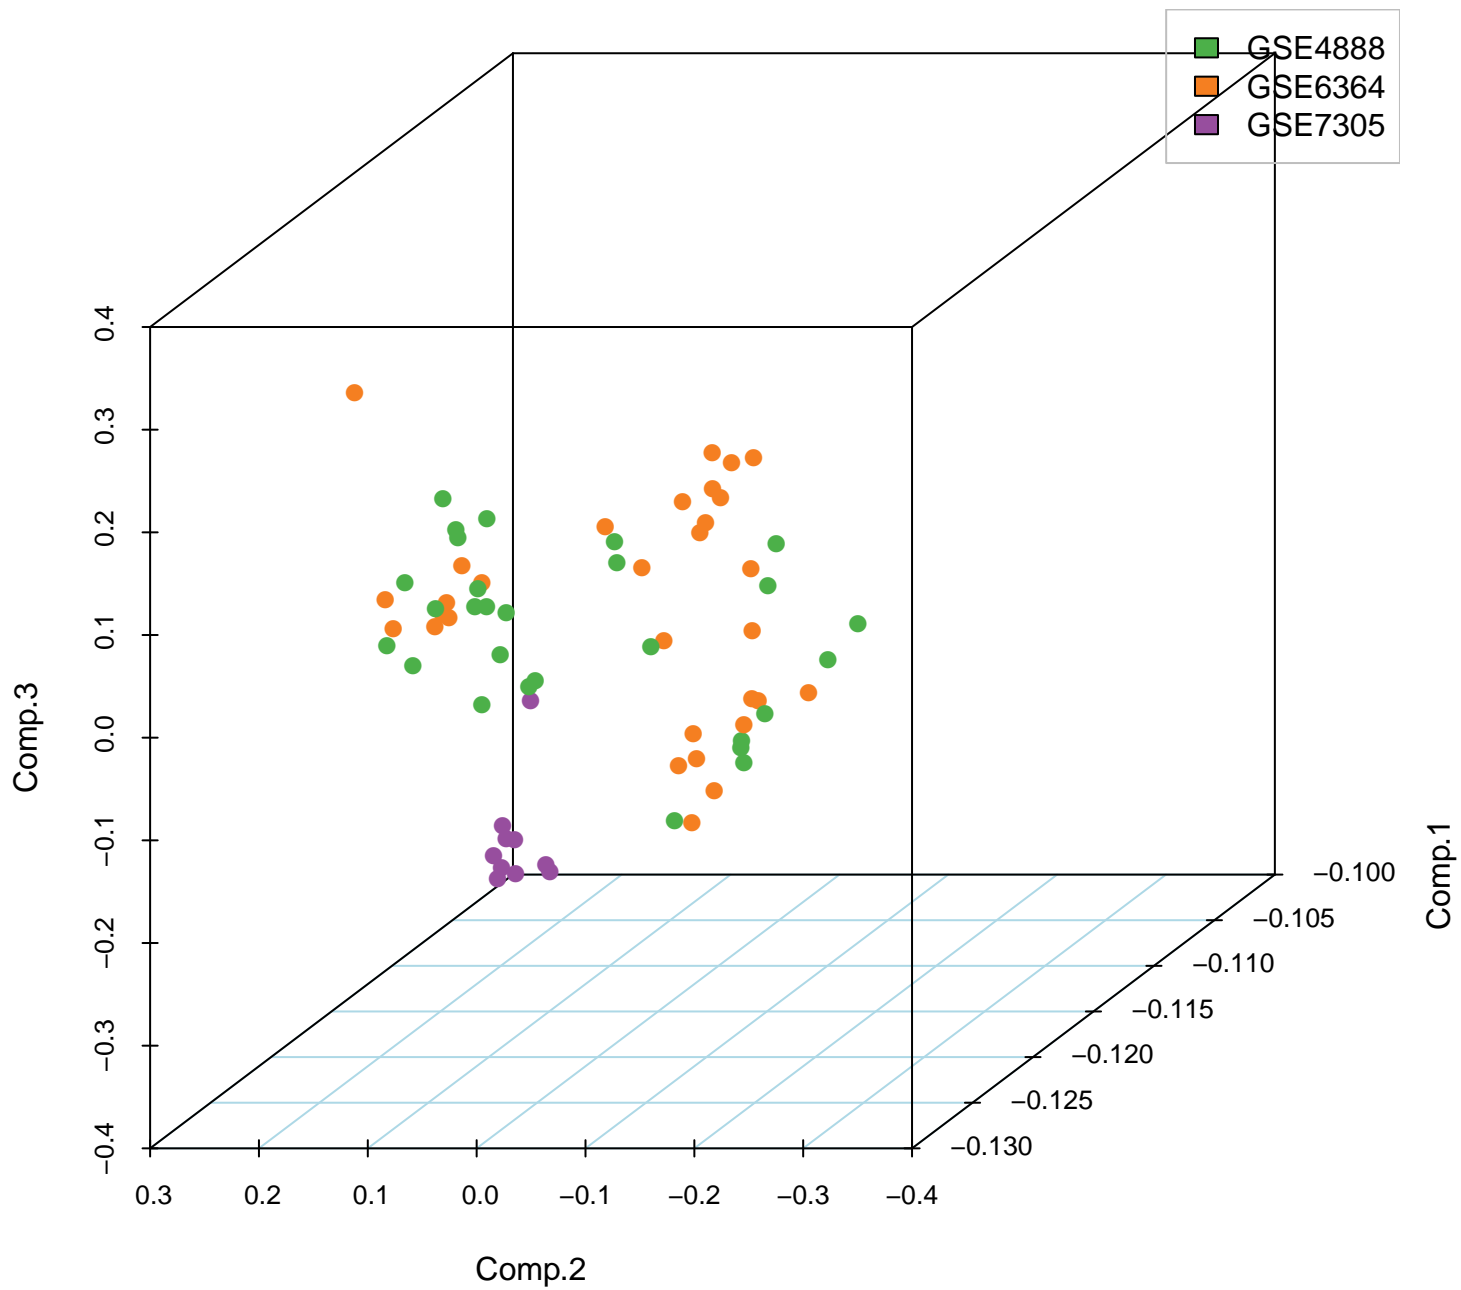

# PCA

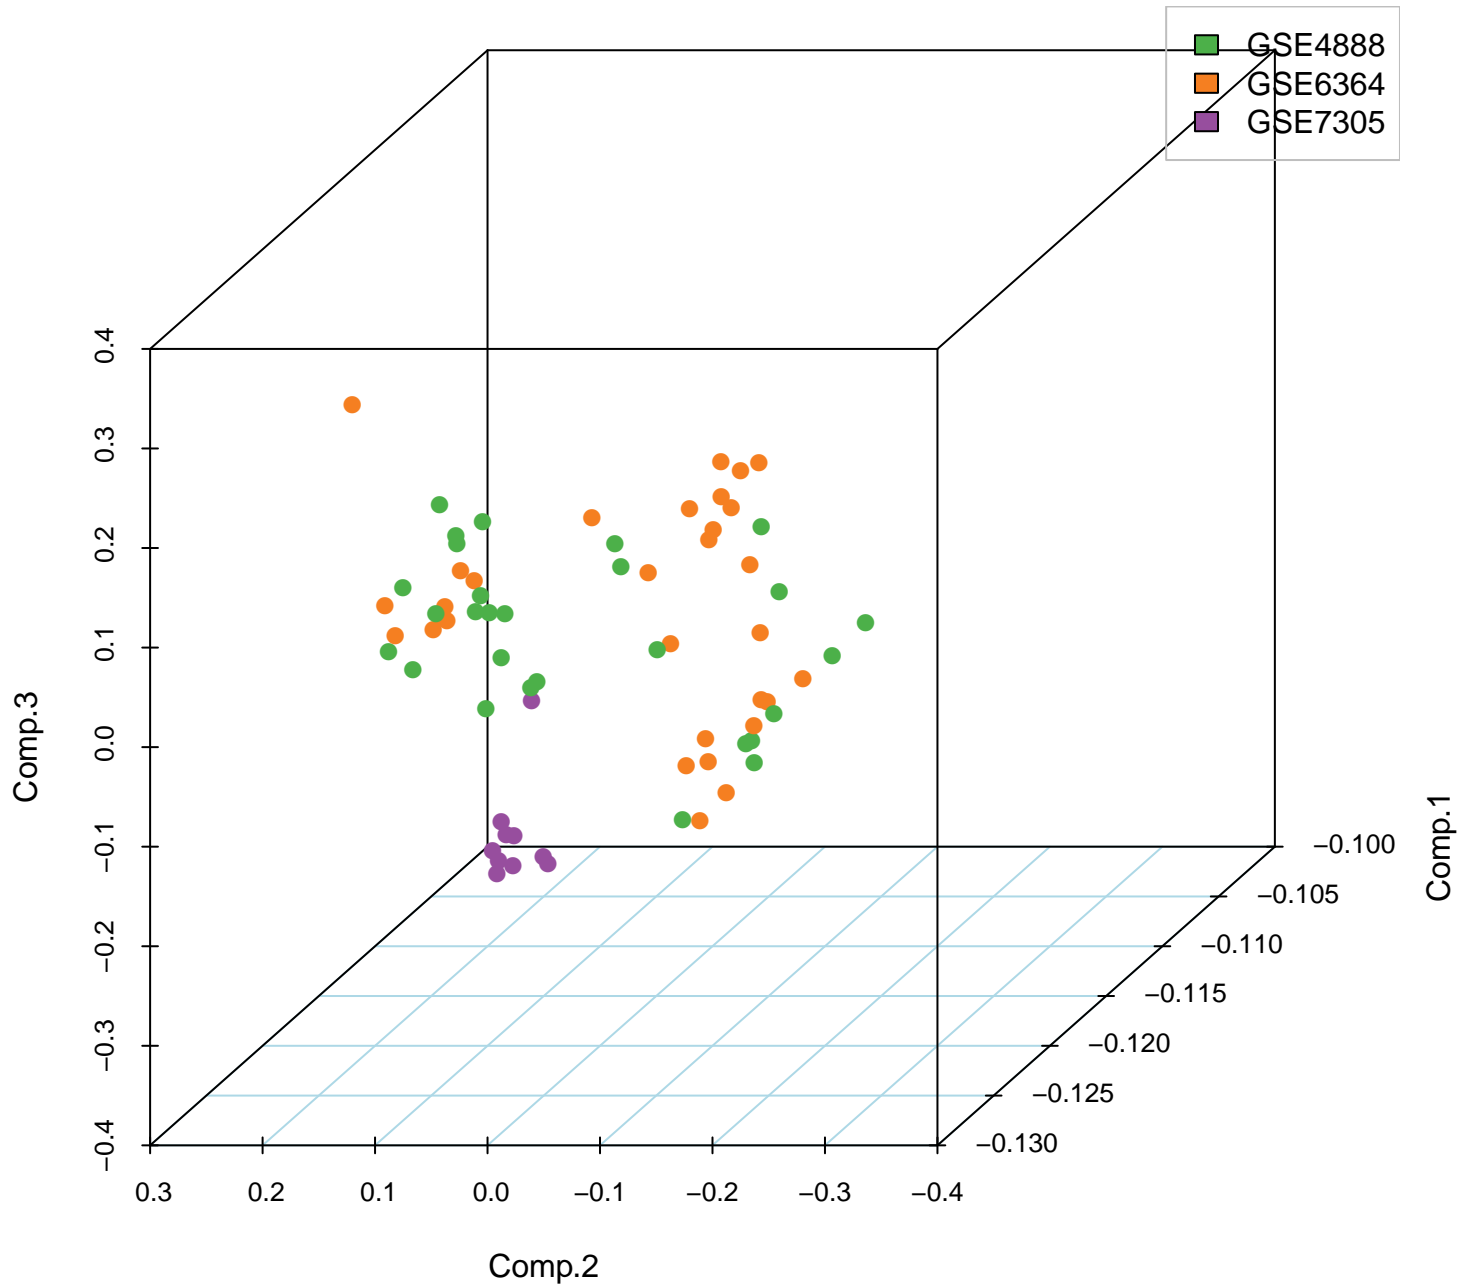



# PCA

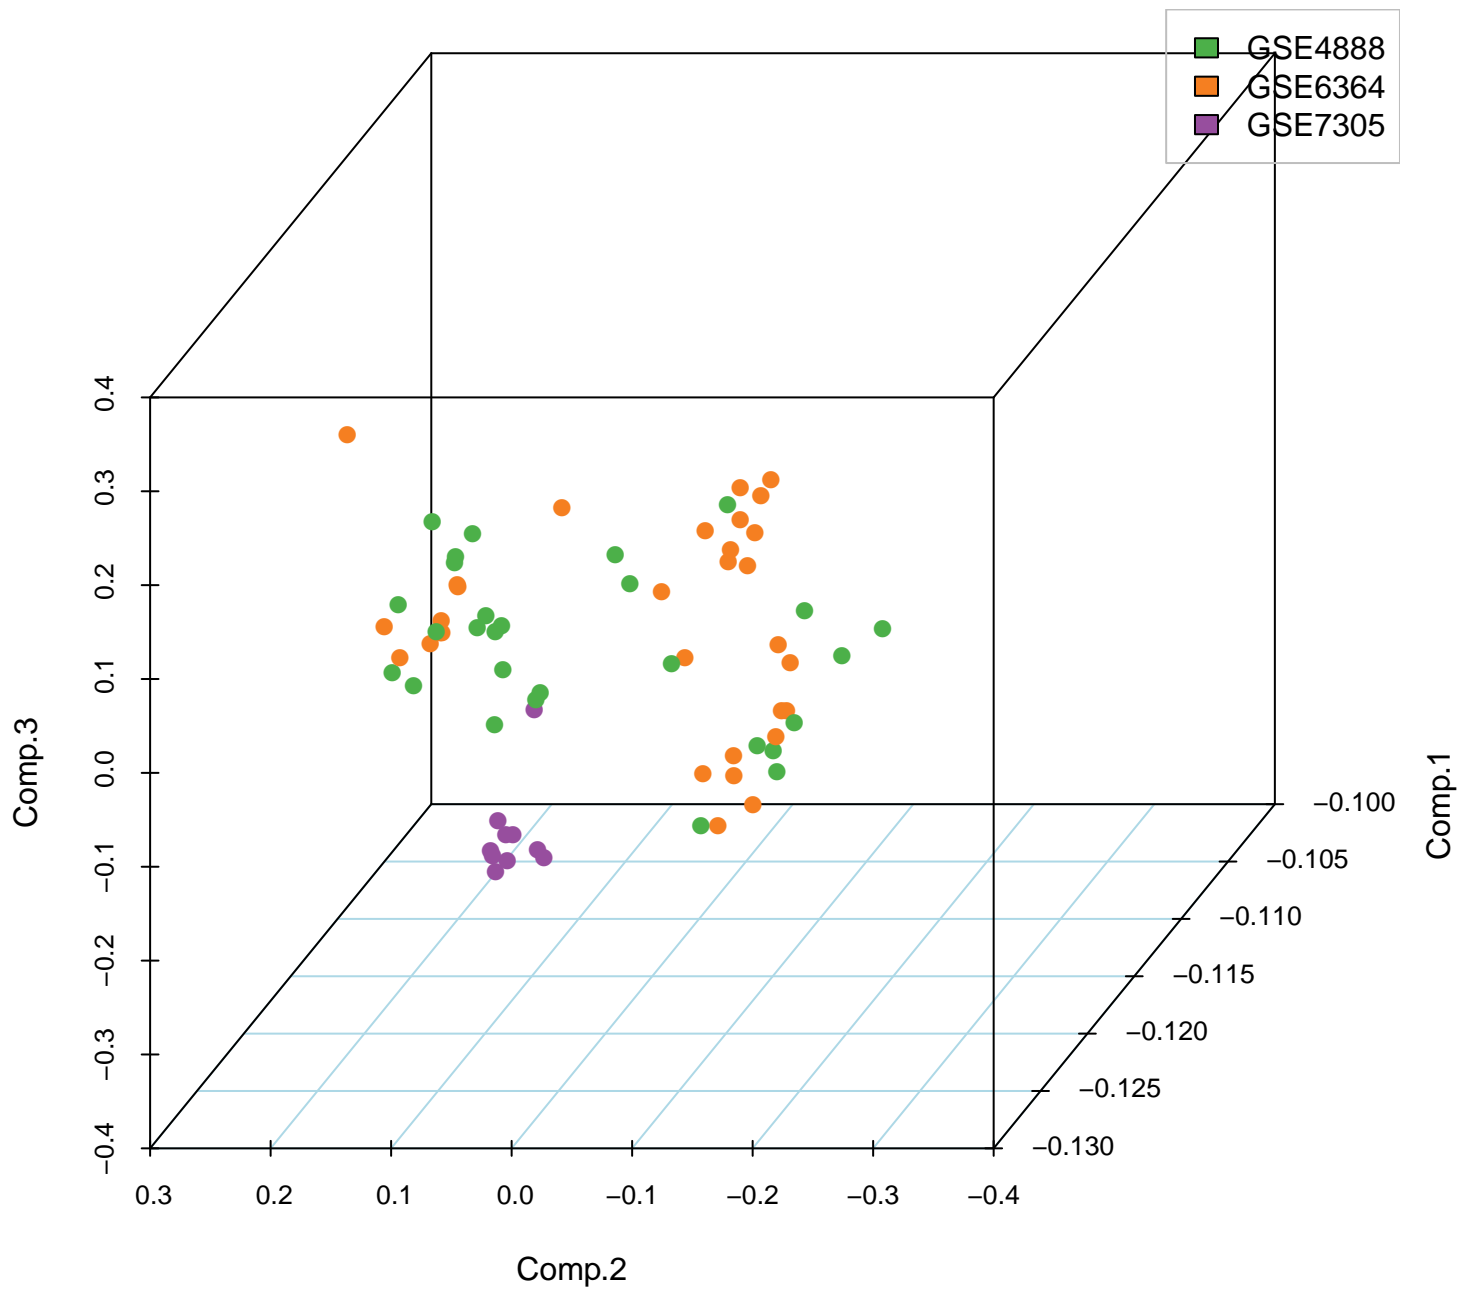



# PCA

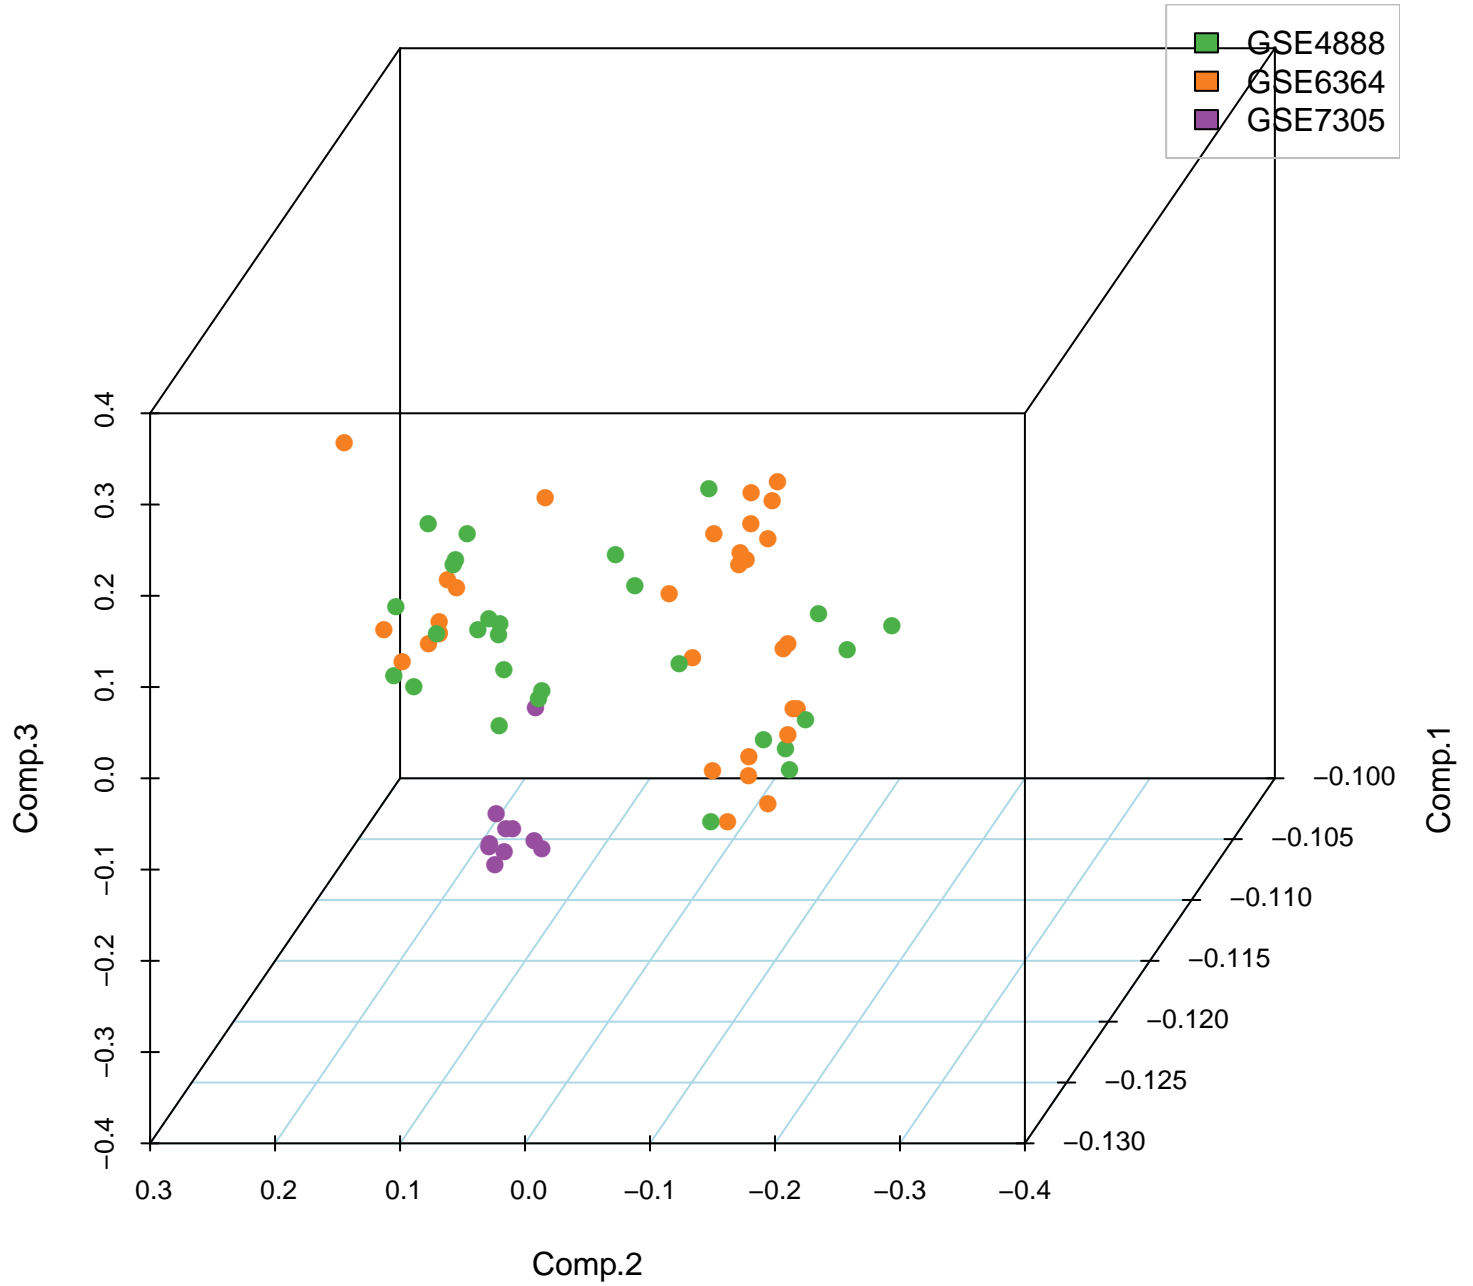

# PCA

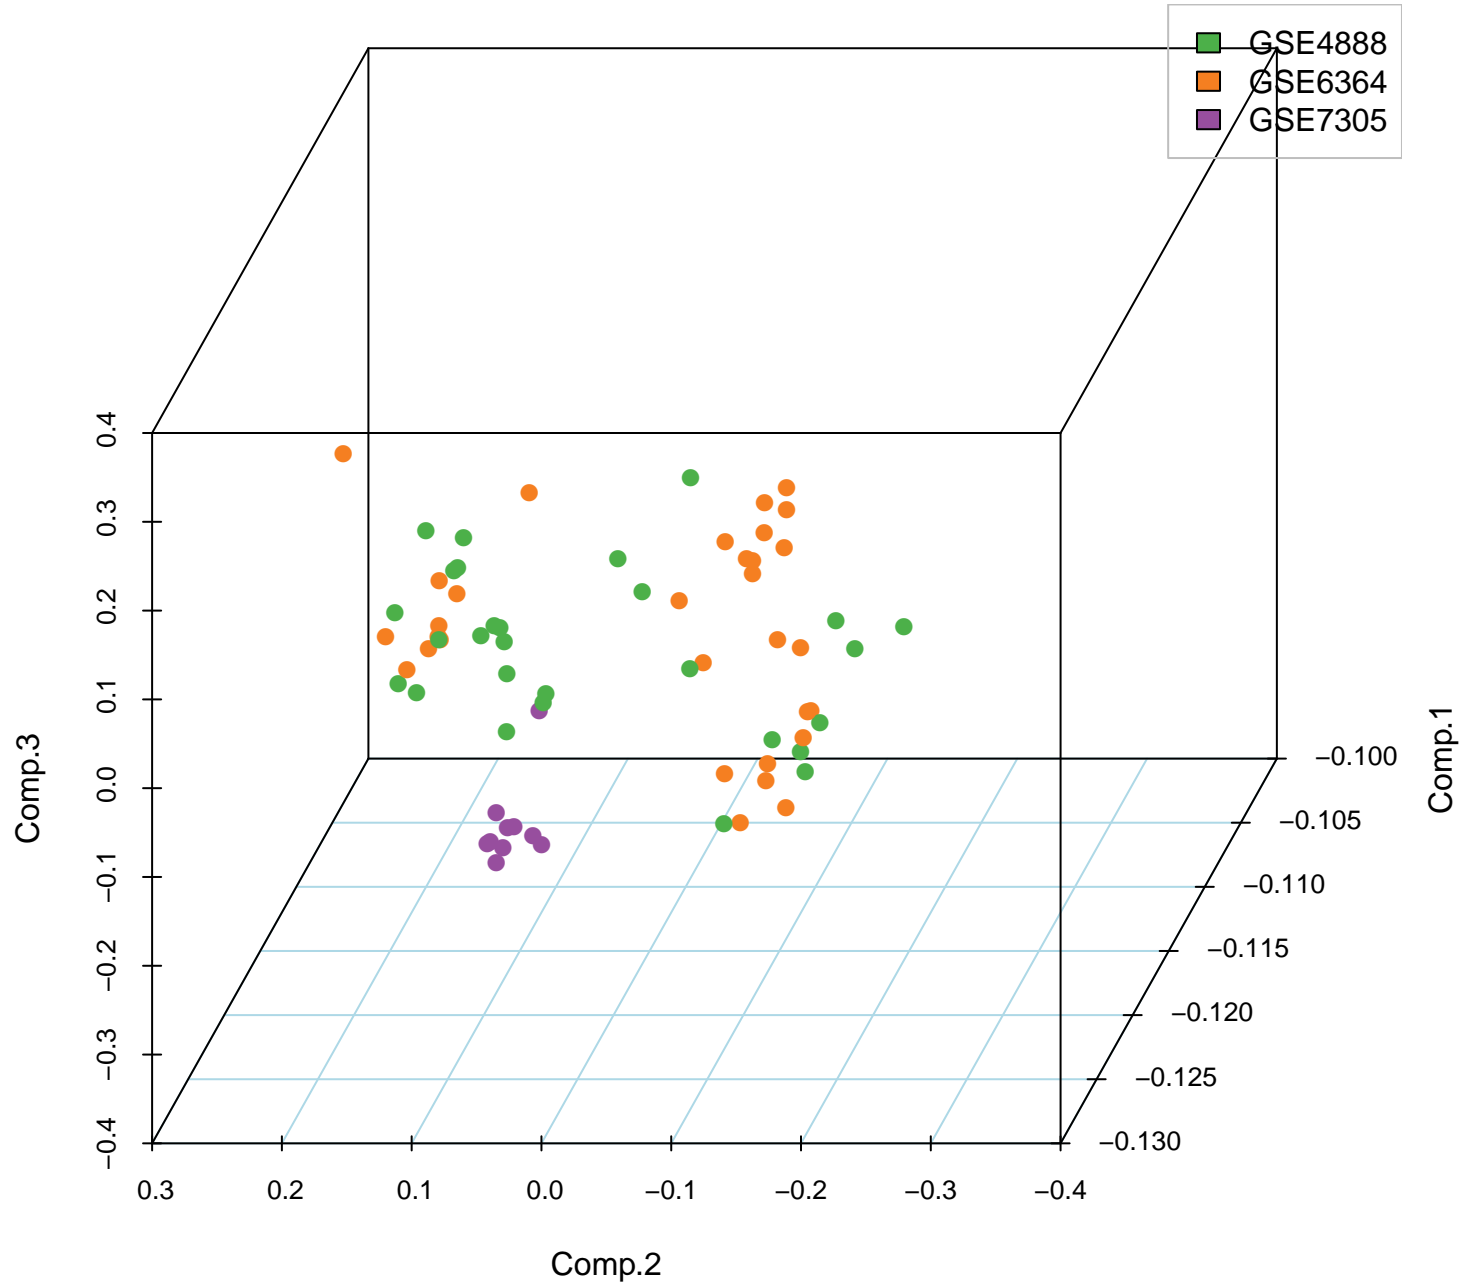



# PCA

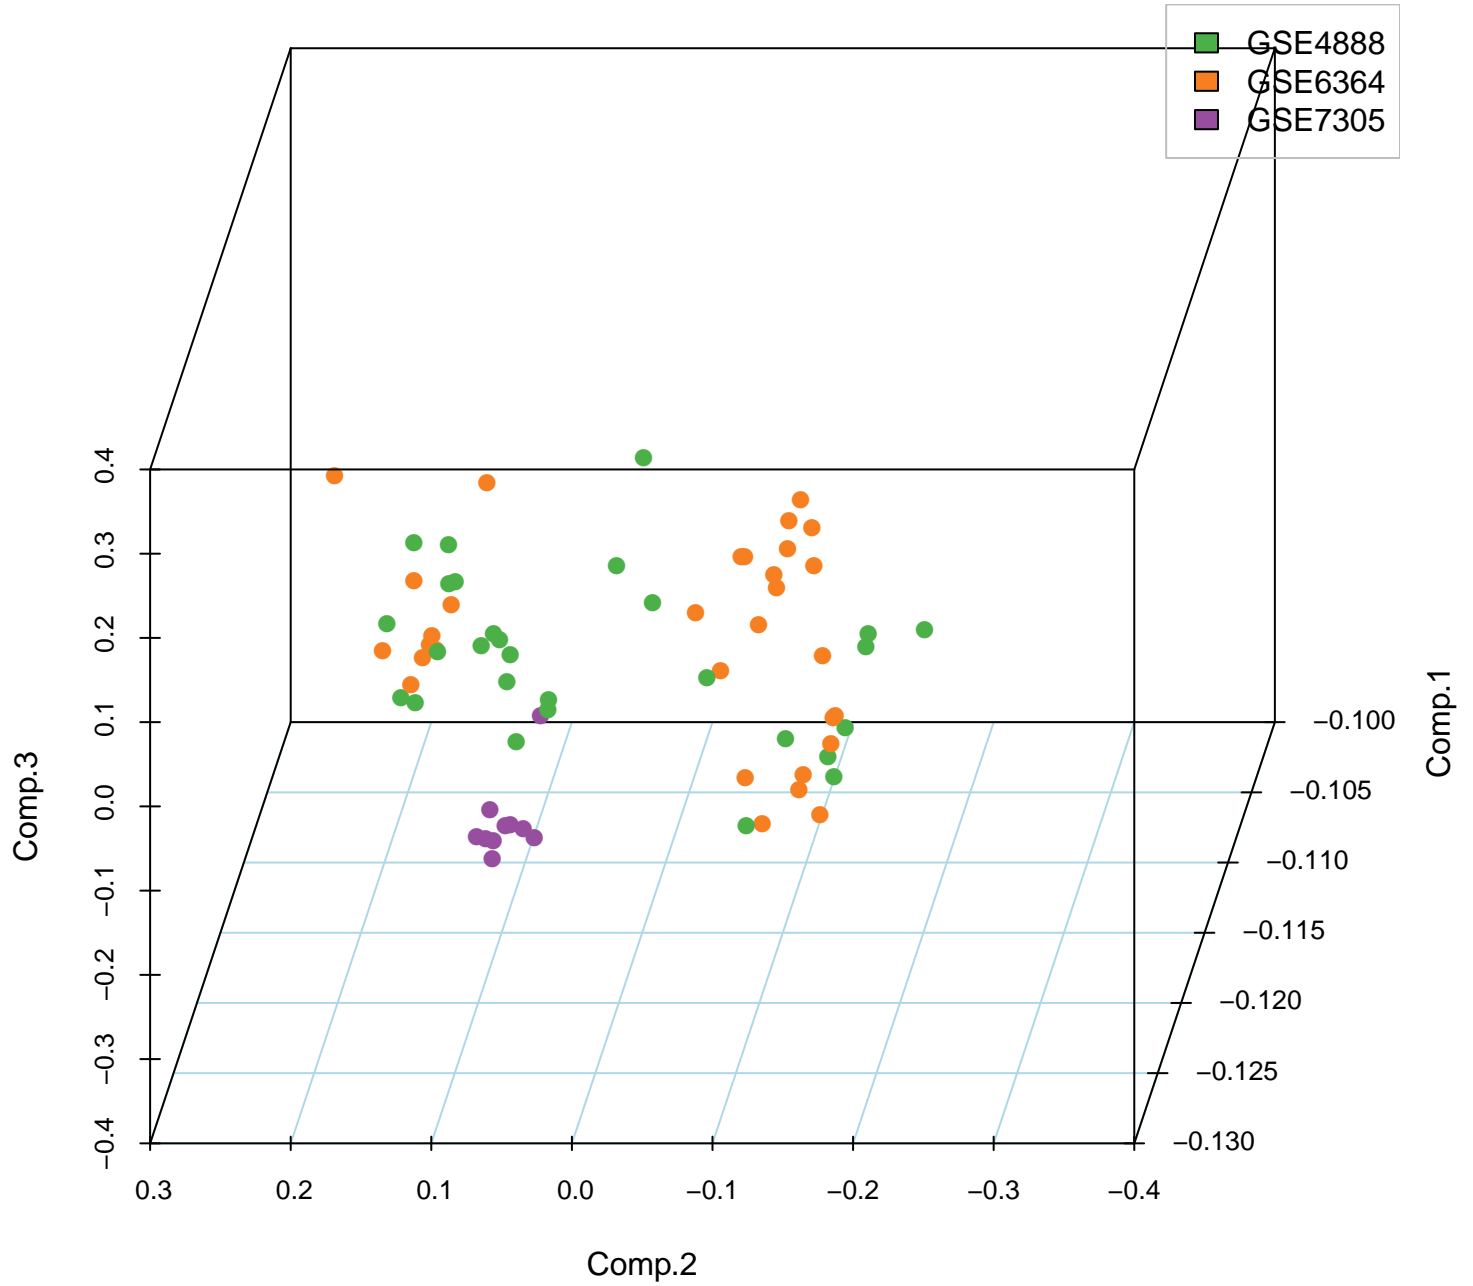

# PCA

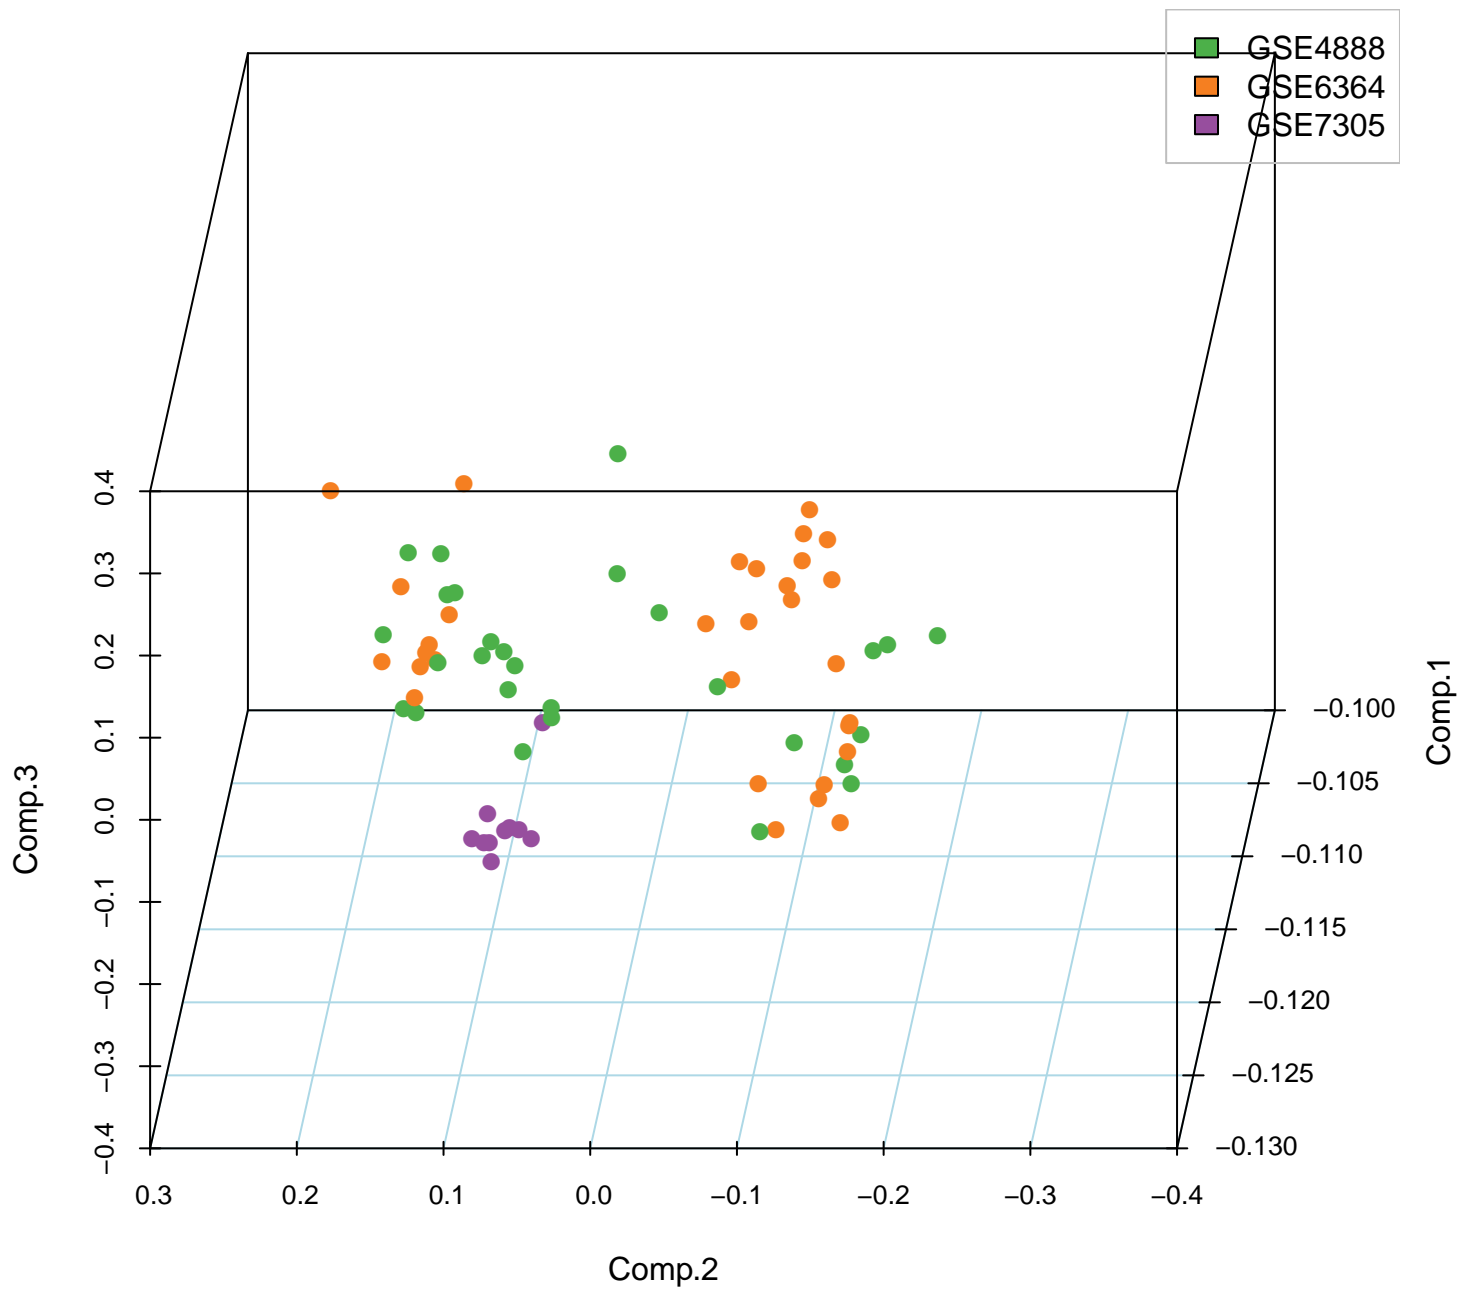





# PCA

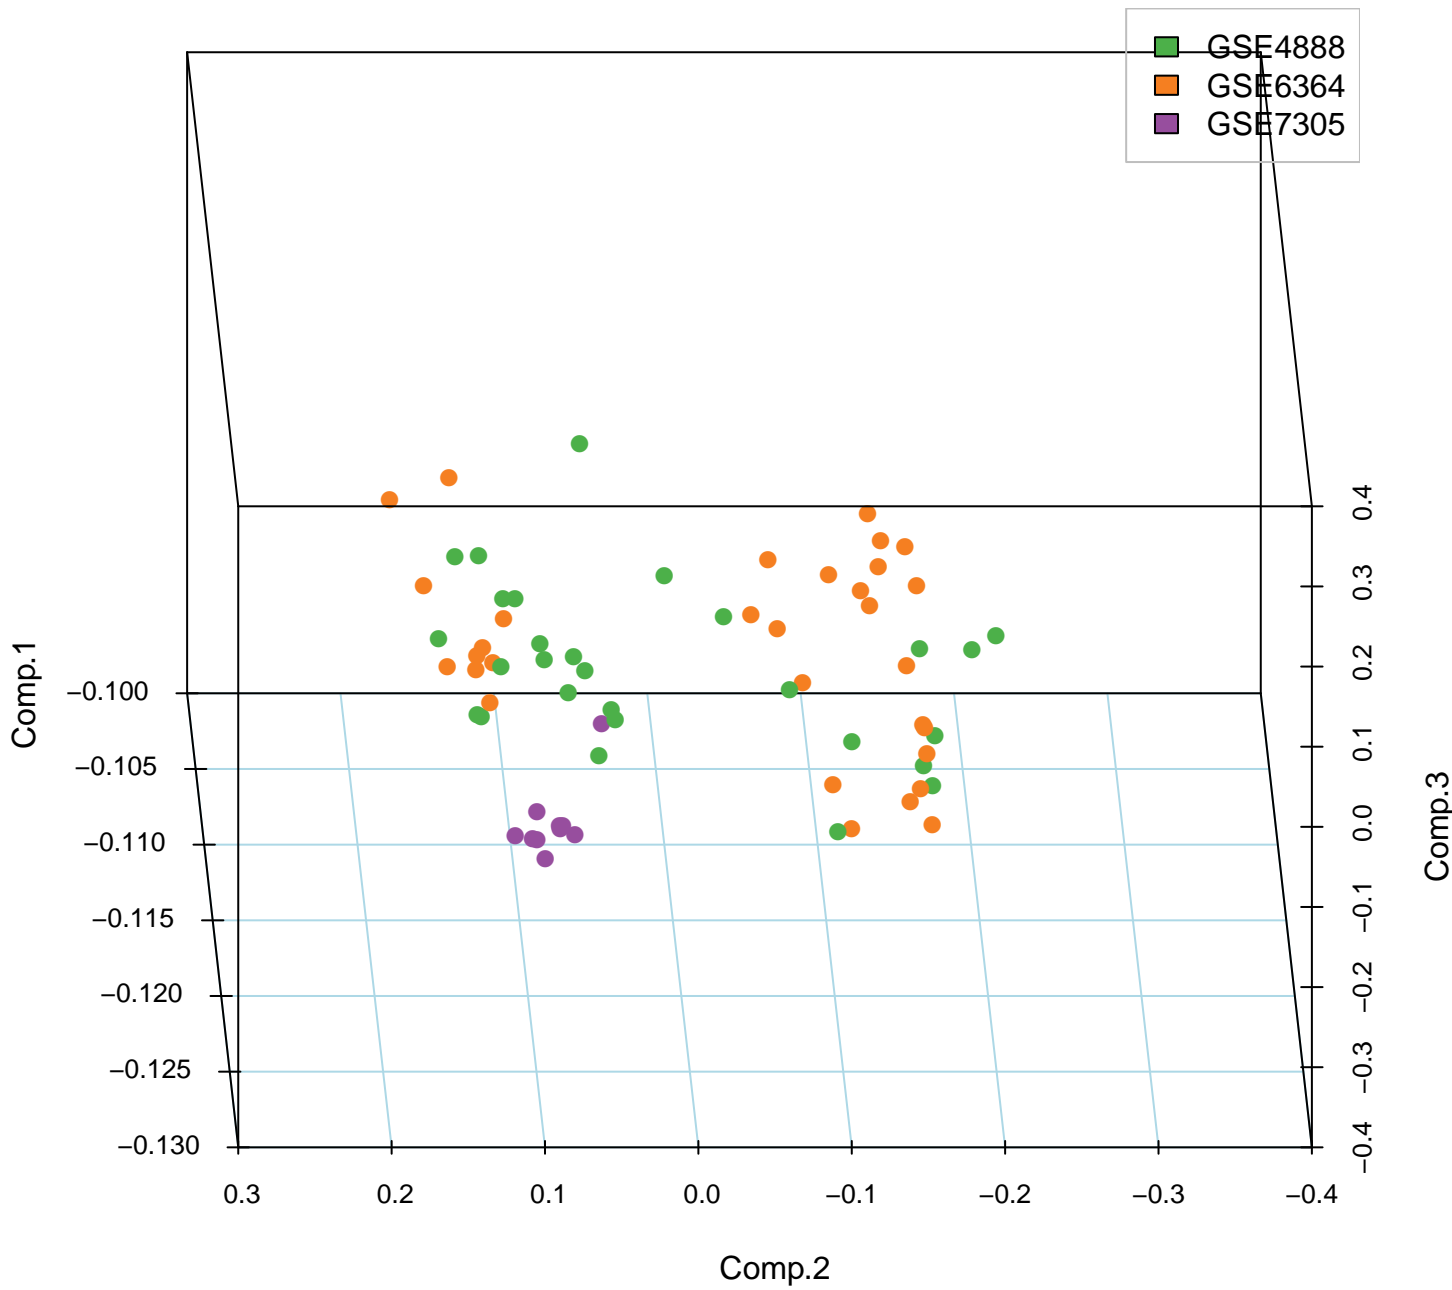



# PCA



# PCA



# PCA



# PCA



# PCA

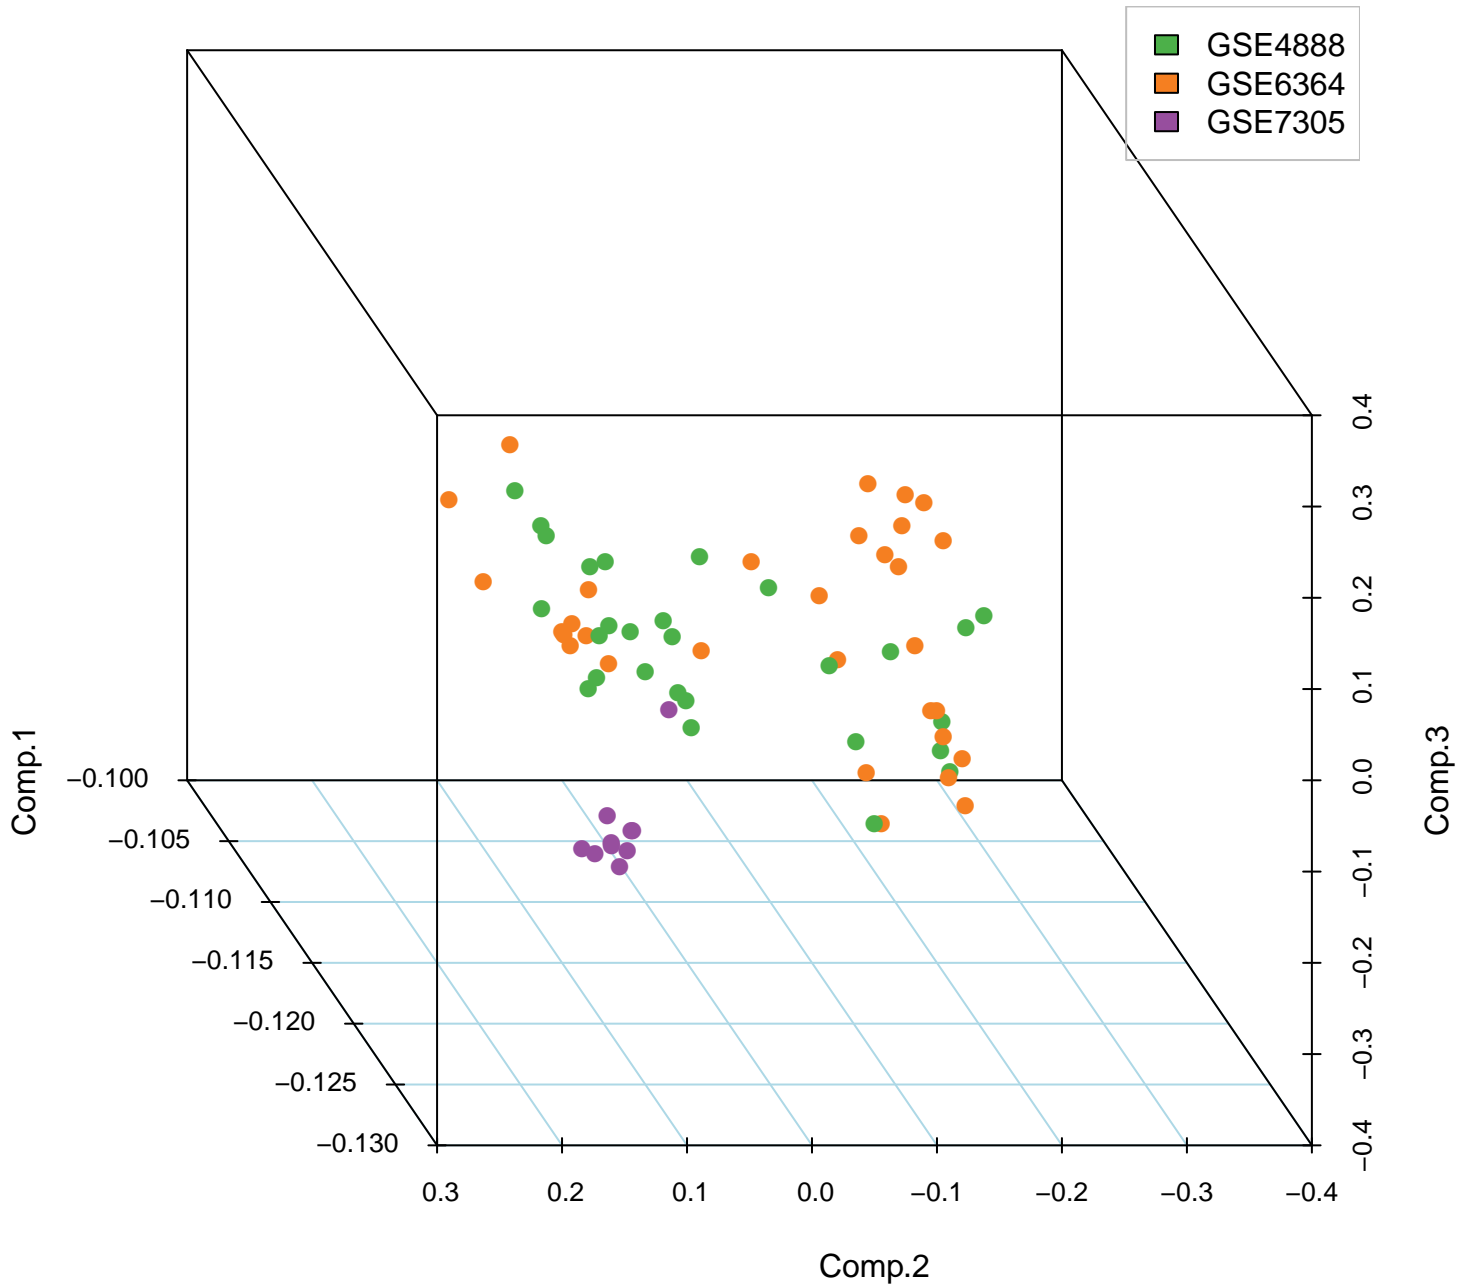

# PCA



# PCA



# PCA





# PCA



# PCA

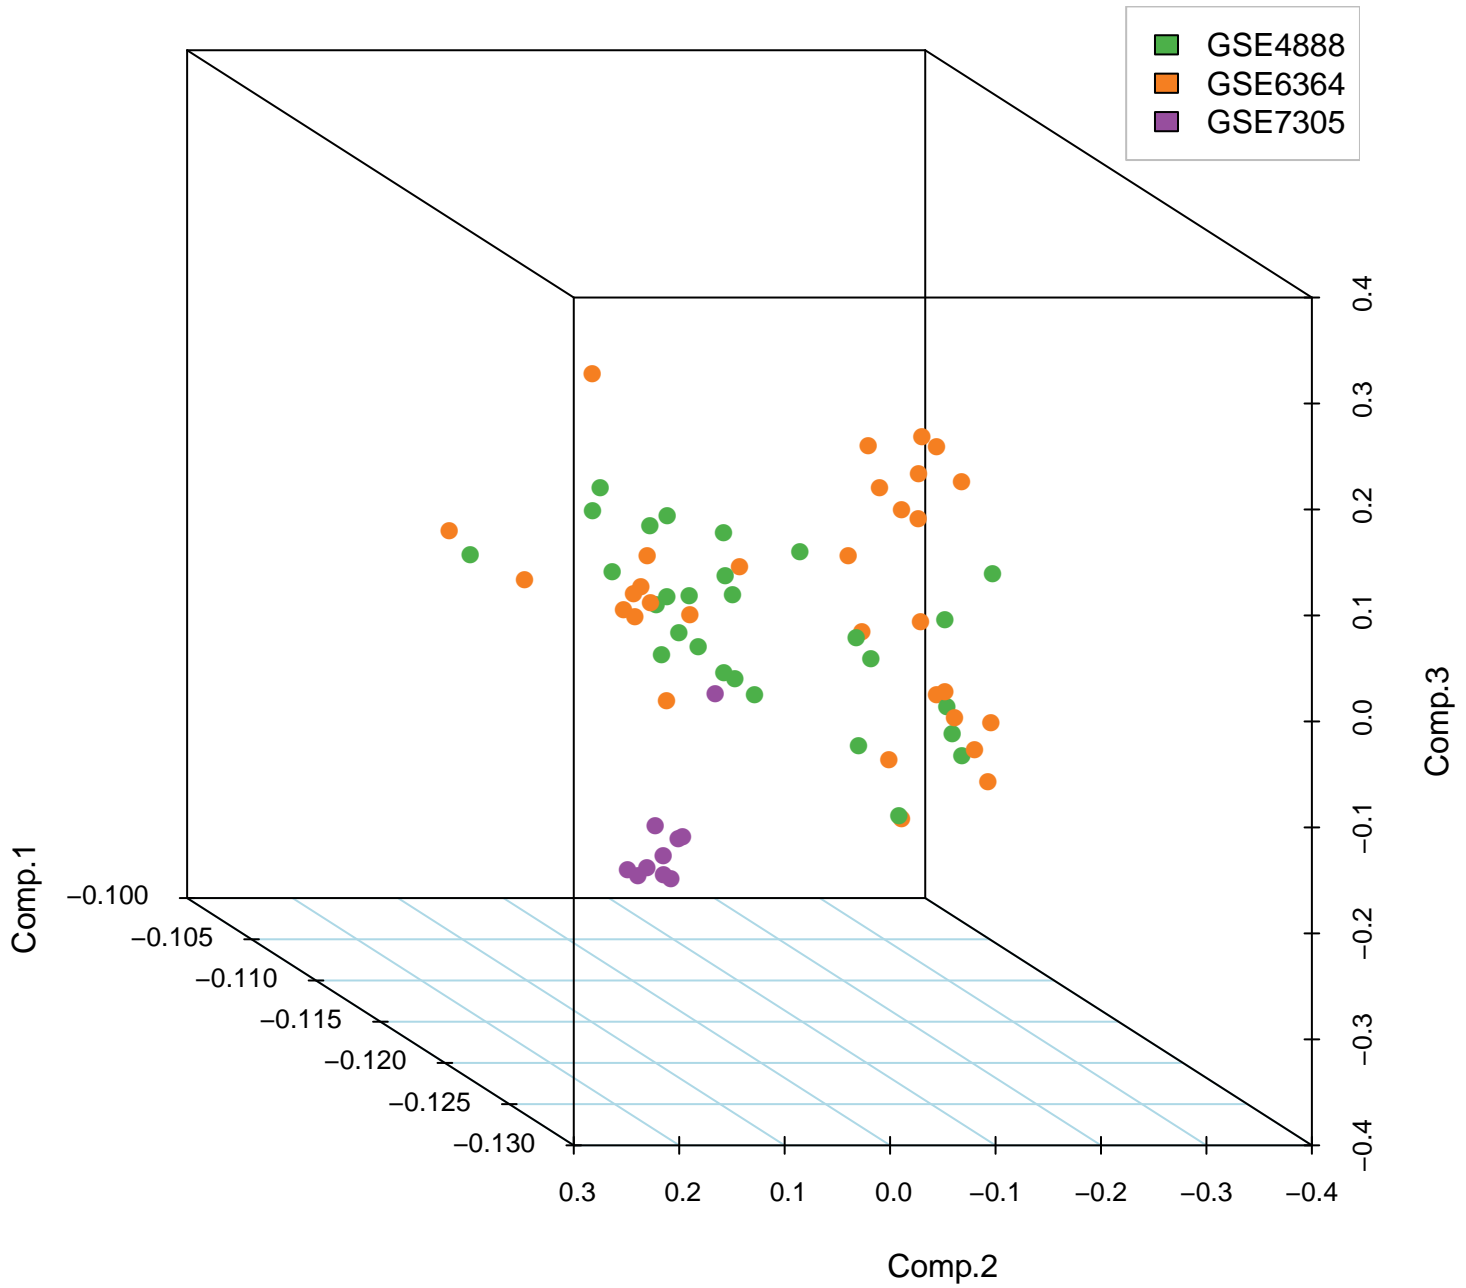

# PCA

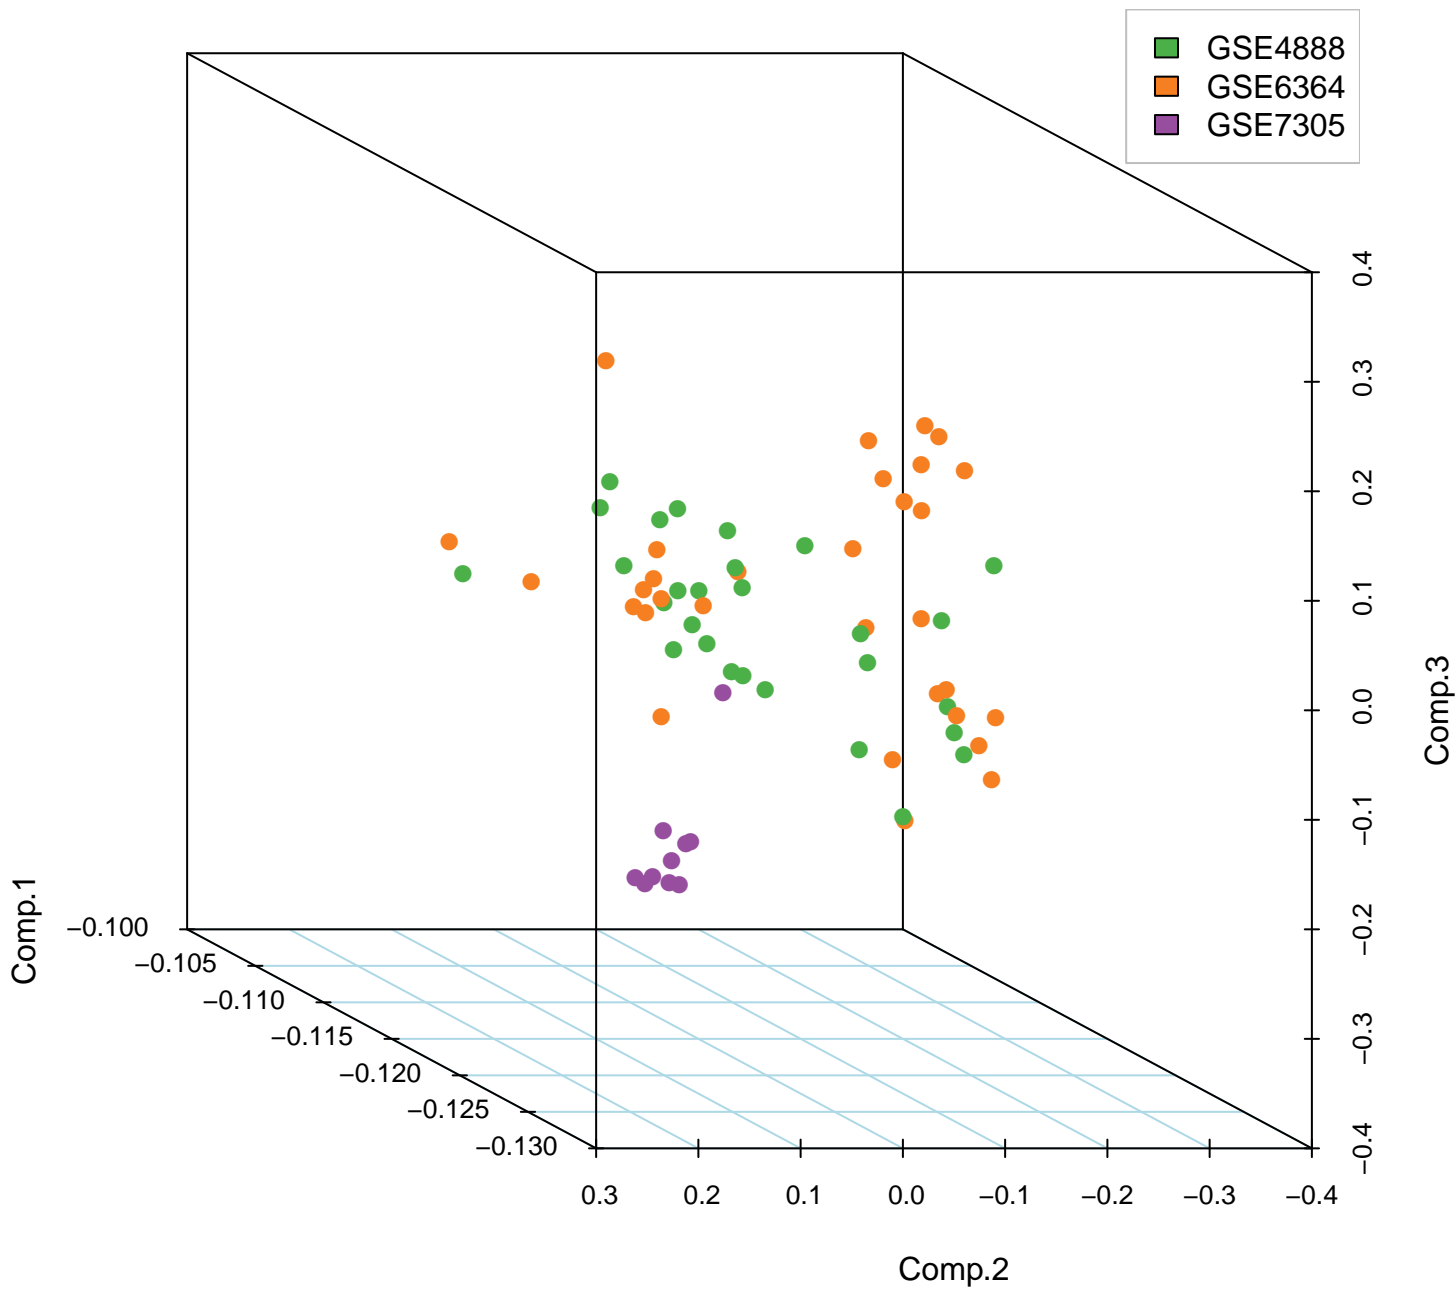

# PCA



# PCA



# PCA





# PCA

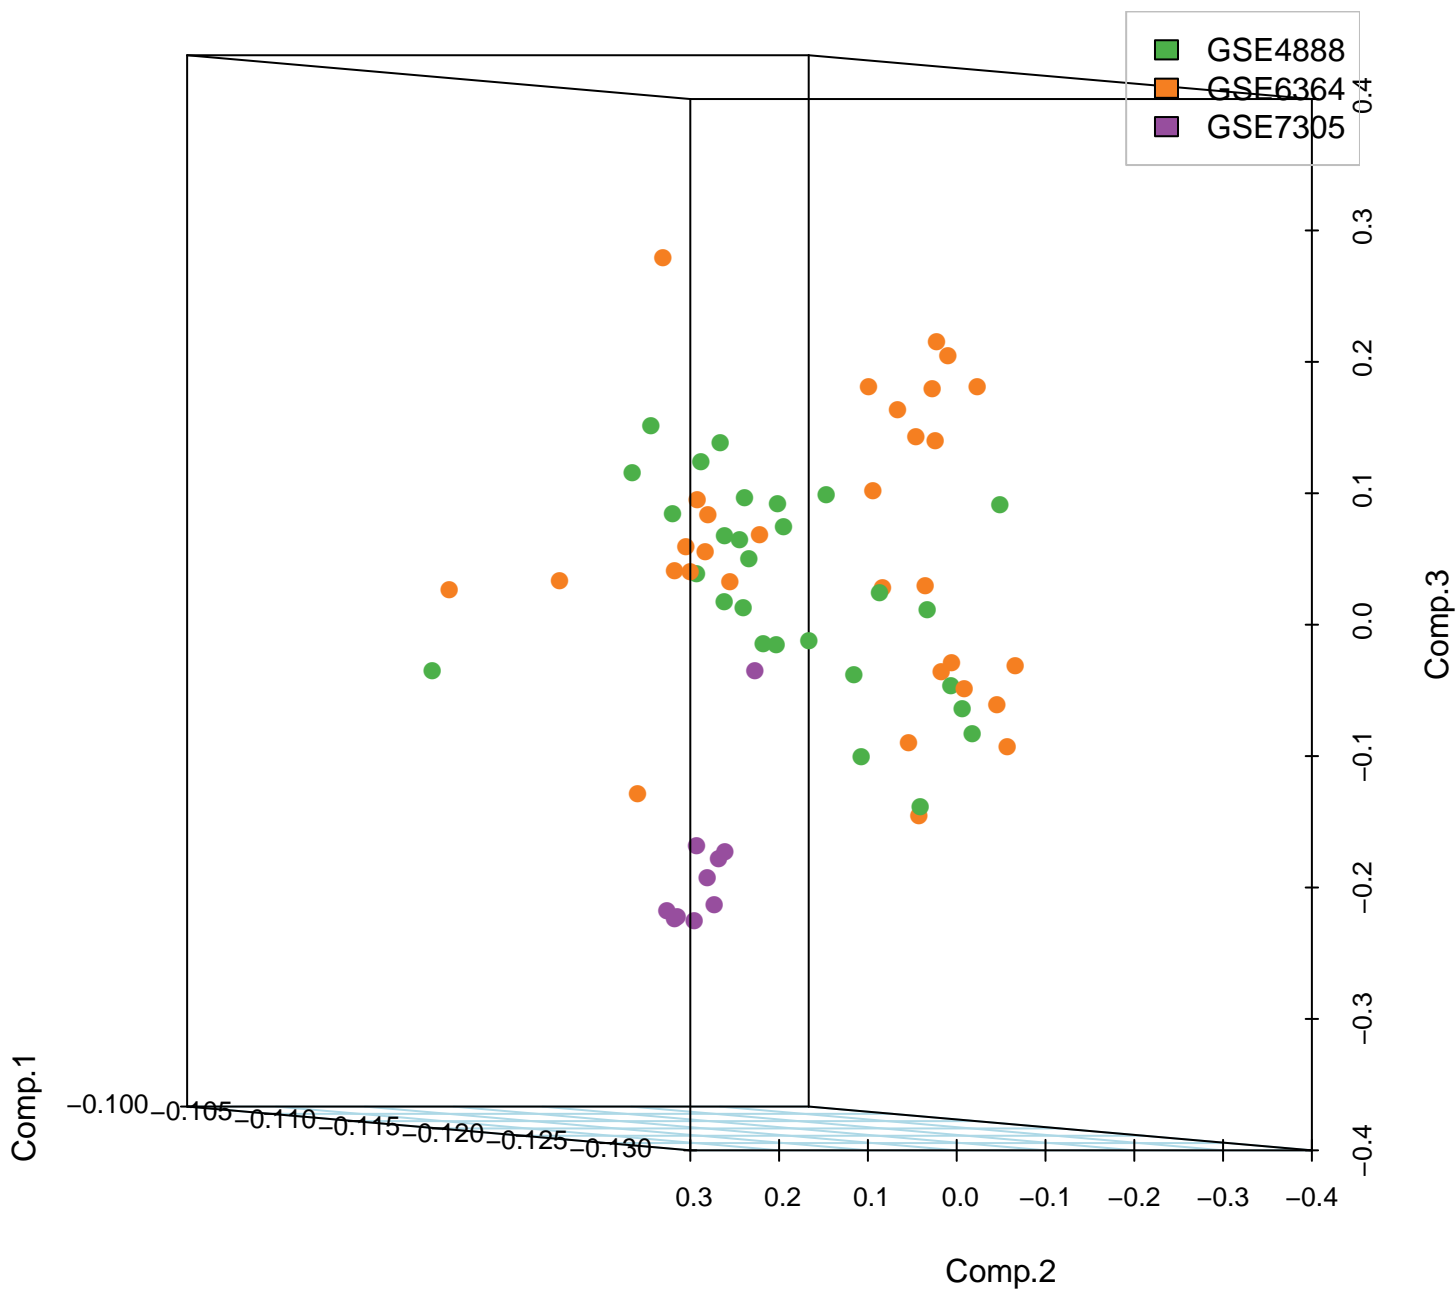



# PCA

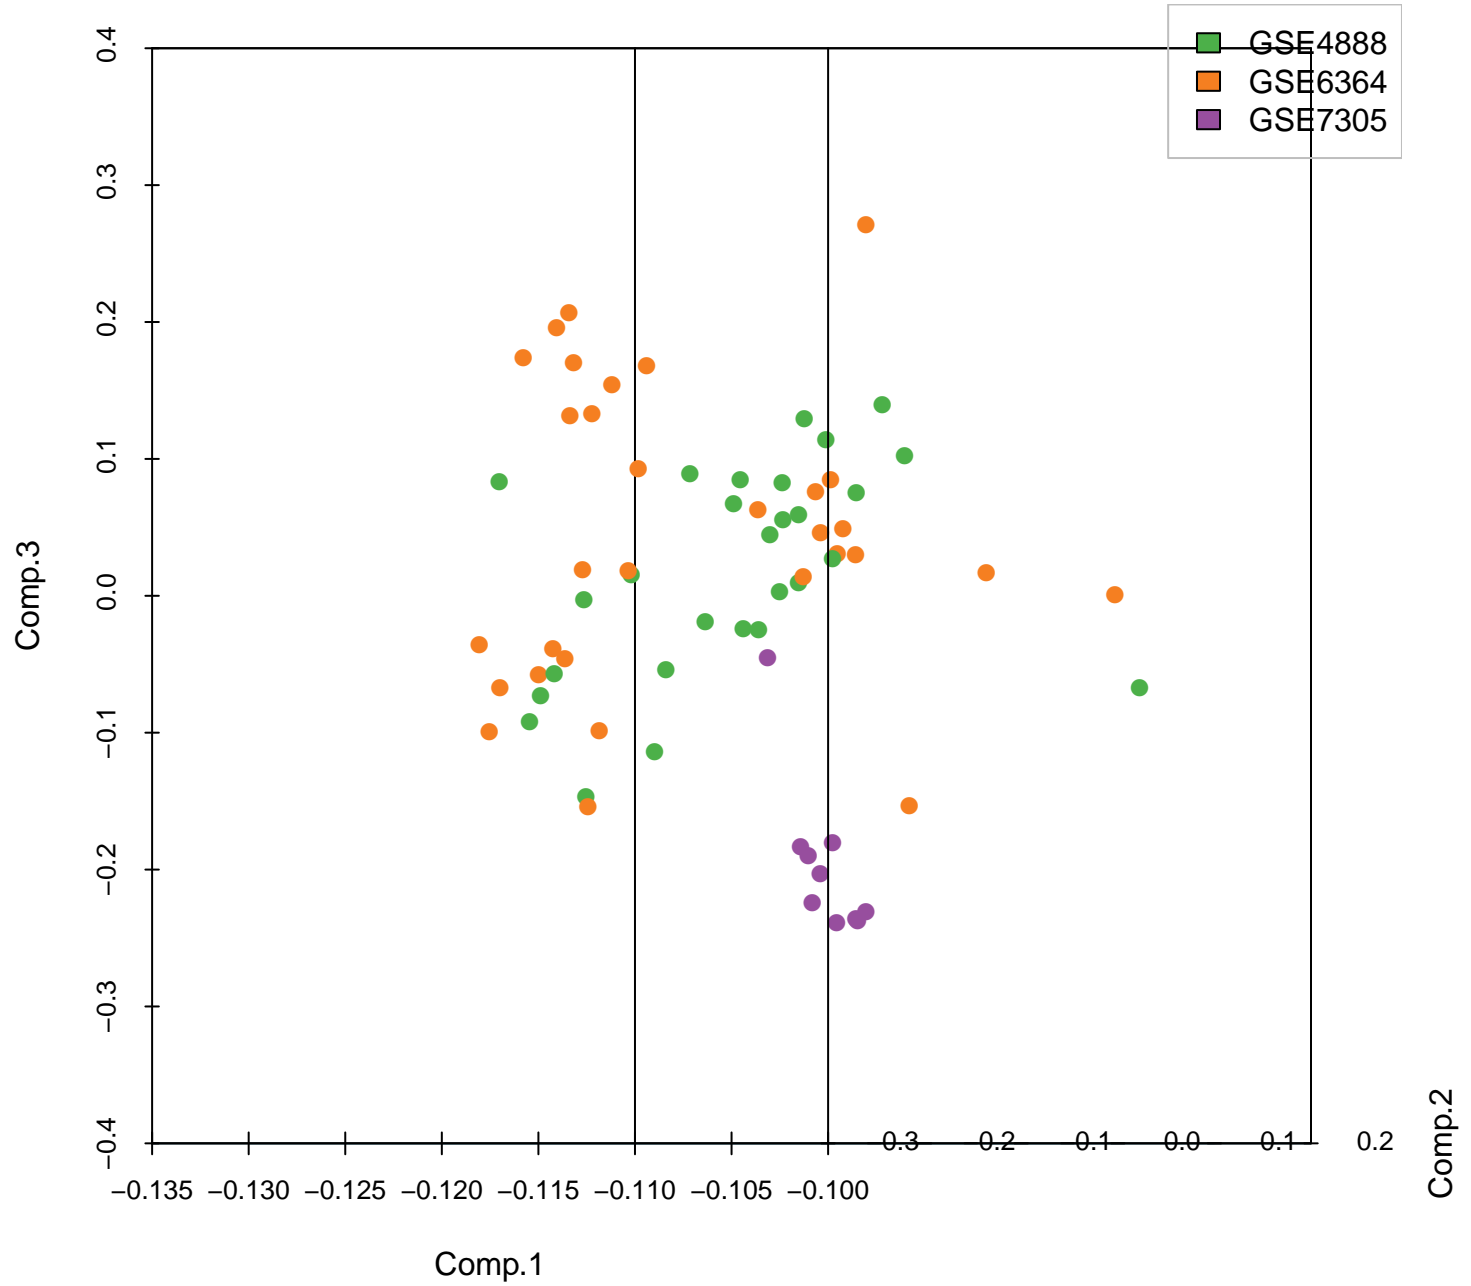

Supplement: Data_S2_(pca_group).pdf [file Data_S2_%28pca_group%29.pdf]
