# Supplementary material for: Identification of key genes and pathways in endometriosis by integrated expression profiles analysis
Source: PeerJ. 2020 Dec 7;8:e10171. doi: 10.7717/peerj.10171 (PMC7727381; doi:10.7717/peerj.10171)
Supplement: Supplemental Information 1 [file peerj-08-10171-s001.xlsx]

## Sheet: Sheet1
DataSet		Serie		Sample		Tissue
GDS2835		GSE7305		GSM175766		EC
GDS2835		GSE7305		GSM175767		EC
GDS2835		GSE7305		GSM175768		EC
GDS2835		GSE7305		GSM175769		EC
GDS2835		GSE7305		GSM175770		EC
GDS2835		GSE7305		GSM175771		EC
GDS2835		GSE7305		GSM175772		EC
GDS2835		GSE7305		GSM175773		EC
GDS2835		GSE7305		GSM175774		EC
GDS2835		GSE7305		GSM175775		EC
GDS2835		GSE7305		GSM175776		EU
GDS2835		GSE7305		GSM175777		EU
GDS2835		GSE7305		GSM175778		EU
GDS2835		GSE7305		GSM175779		EU
GDS2835		GSE7305		GSM175780		EU
GDS2835		GSE7305		GSM175781		EU
GDS2835		GSE7305		GSM175782		EU
GDS2835		GSE7305		GSM175783		EU
GDS2835		GSE7305		GSM175784		EU
GDS2835		GSE7305		GSM175785		EU
GDS2737		GSE6364		GSM150190		EU
GDS2737		GSE6364		GSM150191		EU
GDS2737		GSE6364		GSM150192		EU
GDS2737		GSE6364		GSM150193		EU
GDS2737		GSE6364		GSM150194		EU
GDS2737		GSE6364		GSM150195		EU
GDS2737		GSE6364		GSM150196		NE
GDS2737		GSE6364		GSM150197		NE
GDS2737		GSE6364		GSM150198		NE
GDS2737		GSE6364		GSM150199		NE
GDS2737		GSE6364		GSM150201		NE
GDS2737		GSE6364		GSM150202		EU
GDS2737		GSE6364		GSM150203		EU
GDS2737		GSE6364		GSM150204		EU
GDS2737		GSE6364		GSM150205		EU
GDS2737		GSE6364		GSM150206		EU
GDS2737		GSE6364		GSM150207		EU
GDS2737		GSE6364		GSM150208		NE
GDS2737		GSE6364		GSM150209		NE
GDS2737		GSE6364		GSM150210		NE
GDS2737		GSE6364		GSM150211		EU
GDS2737		GSE6364		GSM150212		EU
GDS2737		GSE6364		GSM150213		EU
GDS2737		GSE6364		GSM150214		EU
GDS2737		GSE6364		GSM150215		EU
GDS2737		GSE6364		GSM150216		EU
GDS2737		GSE6364		GSM150217		EU
GDS2737		GSE6364		GSM150218		EU
GDS2737		GSE6364		GSM150219		EU
GDS2737		GSE6364		GSM150220		NE
GDS2737		GSE6364		GSM150221		NE
GDS2737		GSE6364		GSM150222		NE
GDS2737		GSE6364		GSM150223		NE
GDS2737		GSE6364		GSM150224		NE
GDS2737		GSE6364		GSM150225		NE
GDS2737		GSE6364		GSM150226		NE
GDS2737		GSE6364		GSM150227		NE
GDS2052		GSE4888		GSM109818		NE
GDS2052		GSE4888		GSM109819		NE
GDS2052		GSE4888		GSM109823		NE
GDS2052		GSE4888		GSM109832		NE
GDS2052		GSE4888		GSM109833		NE
GDS2052		GSE4888		GSM109834		NE
GDS2052		GSE4888		GSM109835		NE
GDS2052		GSE4888		GSM109836		NE
GDS2052		GSE4888		GSM109837		NE
GDS2052		GSE4888		GSM109838		NE
GDS2052		GSE4888		GSM109839		NE
GDS2052		GSE4888		GSM109840		NE
