# Supplementary material for: Identification of key genes and pathways in endometriosis by integrated expression profiles analysis
Source: PeerJ. 2020 Dec 7;8:e10171. doi: 10.7717/peerj.10171 (PMC7727381; doi:10.7717/peerj.10171)
Supplement: Supplemental Information 7 [file peerj-08-10171-s007.xlsx]

## Sheet: EU - NE
ID_REF
