# Supplementary material for: Identification of key genes and pathways in endometriosis by integrated expression profiles analysis
Source: PeerJ. 2020 Dec 7;8:e10171. doi: 10.7717/peerj.10171 (PMC7727381; doi:10.7717/peerj.10171)
Supplement: Supplemental Information 11 [file peerj-08-10171-s011.xlsx]

## Sheet: Sheet1
Category	Term	Count	%	PValue	Genes	List Total	Pop Hits	Pop Total	Fold Enrichment	Bonferroni	Benjamini	FDR
GOTERM_BP_DIRECT	GO:0000122~negative regulation of transcription from RNA polymerase II promoter	31	0.0524366	9.57086e-05	CREBRF, TSHZ2, MEF2A, FST, SNCA, WWC2, HCFC2, PAWR, CALR, TCF7L2, ARX, GATA6, ZNF148, SOX15, NEDD4L, NFATC2, SP100, KLF12, ESR1, LEF1, WHSC1, SMYD2, PROX1, FOXP1, FOXP2, HHEX, HOXD8, TXN, MDM2, PTCH1, PEG3	332	720	16792	2.17768	0.172241	0.172241	0.164185
GOTERM_BP_DIRECT	GO:0045892~negative regulation of transcription, DNA-templated	22	0.0372131	0.000948243	TNFSF4, SP100, RSF1, LEF1, CENPF, BIRC5, CALR, PROX1, TCF7L2, FOXN3, FOXP1, FOXP2, PURA, HHEX, PRMT2, GATA6, ZNF148, MEG3, ZNF540, MDM2, LHX9, TWIST2	332	499	16792	2.22991	0.846441	0.608134	1.61552
GOTERM_BP_DIRECT	GO:0000910~cytokinesis	6	0.010149	0.00246862	ZFYVE26, DIAPH2, PIK3C3, BIRC5, ESPL1, CIT	332	48	16792	6.32229	0.992415	0.803518	4.15458
GOTERM_BP_DIRECT	GO:0008584~male gonad development	8	0.013532	0.00256608	GATA6, HOXA11, HOXA10, ESR1, SOX15, LHX9, FANCA, WNT2B	332	94	16792	4.30454	0.993746	0.718783	4.31522
GOTERM_BP_DIRECT	GO:0071526~semaphorin-plexin signaling pathway	5	0.00845752	0.00386417	SEMA5A, SEMA6A, SEMA6D, PLXNA2, SEMA3F	332	33	16792	7.66338	0.999522	0.783313	6.43075
GOTERM_BP_DIRECT	GO:0051897~positive regulation of protein kinase B signaling	7	0.0118405	0.00628636	SEMA5A, TNFAIP8L3, OSBPL8, TXN, CHI3L1, ANGPT1, TCF7L2	332	84	16792	4.21486	0.999996	0.874543	10.261
GOTERM_BP_DIRECT	GO:0043433~negative regulation of sequence-specific DNA binding transcription factor activity	6	0.010149	0.00650236	SP100, TNFSF4, ESR1, PTCH1, PROX1, TCF7L2	332	60	16792	5.05783	0.999997	0.841276	10.5953
GOTERM_BP_DIRECT	GO:0030948~negative regulation of vascular endothelial growth factor receptor signaling pathway	3	0.00507451	0.00761941	HHEX, MEG3, MMRN2	332	7	16792	21.6764	1	0.848663	12.3055
GOTERM_BP_DIRECT	GO:0050727~regulation of inflammatory response	6	0.010149	0.00797895	TNFSF4, FANCD2, ESR1, CASP1, FANCA, FOXP1	332	63	16792	4.81698	1	0.827604	12.8493
GOTERM_BP_DIRECT	GO:0006461~protein complex assembly	8	0.013532	0.00811531	CDK1, LPXN, PICALM, ZNF148, MDM2, WASL, SKAP2, FANCA	332	116	16792	3.48816	1	0.799975	13.0548
GOTERM_BP_DIRECT	GO:0030154~cell differentiation	18	0.0304471	0.0105853	GNA13, FLT1, ARHGEF28, CENPF, DLK1, FOXN3, FXR1, PURA, HHEX, ADIRF, NOTCH4, MEG3, SOX15, WIPF3, ANGPT1, TMEM176B, TWIST2, CREBL2	332	462	16792	1.97058	1	0.852019	16.6979
GOTERM_BP_DIRECT	GO:0001755~neural crest cell migration	5	0.00845752	0.011703	SEMA5A, SEMA6A, SEMA6D, SEMA3F, LEF1	332	45	16792	5.61981	1	0.855933	18.2988
GOTERM_BP_DIRECT	GO:0016055~Wnt signaling pathway	10	0.016915	0.0120235	CYLD, HHEX, TNIK, CCNY, STRN, LEF1, CD24, FRZB, TCF7L2, WNT2B	332	187	16792	2.70472	1	0.84082	18.7525
GOTERM_BP_DIRECT	GO:0033138~positive regulation of peptidyl-serine phosphorylation	6	0.010149	0.0122969	NTRK2, SNCA, TXN, PIK3CA, ANGPT1, CREBL2	332	70	16792	4.33528	1	0.82544	19.1376
GOTERM_BP_DIRECT	GO:0045893~positive regulation of transcription, DNA-templated	19	0.0321386	0.01395	KLF7, SP100, RSF1, GDF7, HOXA11, ESR1, LEF1, NFYA, PROX1, FOXN3, PRMT2, PICALM, GATA6, NOTCH4, MEG3, PTCH1, NFATC2, NFATC1, CREBL2	332	515	16792	1.866	1	0.842713	21.4299
GOTERM_BP_DIRECT	GO:0048843~negative regulation of axon extension involved in axon guidance	4	0.00676601	0.0141065	SEMA5A, SEMA6A, SEMA6D, SEMA3F	332	26	16792	7.78128	1	0.826864	21.6438
GOTERM_BP_DIRECT	GO:0030334~regulation of cell migration	6	0.010149	0.0153648	GNA13, SERPINE2, PLXNA2, GAB1, DPYSL3, NEXN	332	74	16792	4.10094	1	0.834516	23.343
GOTERM_BP_DIRECT	GO:0055007~cardiac muscle cell differentiation	4	0.00676601	0.0156426	GATA6, CALR, PROX1, FOXP1	332	27	16792	7.49308	1	0.822699	23.7135
GOTERM_BP_DIRECT	GO:0007062~sister chromatid cohesion	7	0.0118405	0.0162505	KIF2C, ESCO1, REC8, CENPL, SMC5, CENPF, BIRC5	332	103	16792	3.43736	1	0.817877	24.5183
GOTERM_BP_DIRECT	GO:0030509~BMP signaling pathway	6	0.010149	0.0170745	GDF7, BMPR2, TGFBR3, LEF1, RYR2, USP15	332	76	16792	3.99302	1	0.817439	25.5964
GOTERM_BP_DIRECT	GO:0045931~positive regulation of mitotic cell cycle	4	0.00676601	0.0172691	CDK1, STAT5B, MDM2, BIRC5	332	28	16792	7.22547	1	0.80569	25.8488
GOTERM_BP_DIRECT	GO:0009952~anterior/posterior pattern specification	6	0.010149	0.0208622	HOXC6, HHEX, HOXB8, HOXA11, BMPR2, HOXA10	332	80	16792	3.79337	1	0.84933	30.3683
GOTERM_BP_DIRECT	GO:0016477~cell migration	9	0.0152235	0.0209042	CDK1, FMNL3, FLT1, CDC42BPA, TGFBR3, ASAP3, PIP5K1A, CD24, NFATC2	332	172	16792	2.64654	1	0.837009	30.4195
GOTERM_BP_DIRECT	GO:0008285~negative regulation of cell proliferation	15	0.0253726	0.0258546	B4GALT1, COL4A3, CLMN, ITGA1, STRN, SMYD2, WNK2, FRZB, SKAP2, PROX1, RERG, DHRS2, SERPINE2, MEG3, NRK	332	396	16792	1.91585	1	0.884167	36.2187
GOTERM_BP_DIRECT	GO:0060389~pathway-restricted SMAD protein phosphorylation	3	0.00507451	0.026179	GDF7, TGFBR3, USP15	332	13	16792	11.6719	1	0.877015	36.5823
GOTERM_BP_DIRECT	GO:0006661~phosphatidylinositol biosynthetic process	5	0.00845752	0.0273464	MTM1, ARF1, PIK3C3, PIK3CA, PIP5K1A	332	58	16792	4.3602	1	0.878302	37.875
GOTERM_BP_DIRECT	GO:0050919~negative chemotaxis	4	0.00676601	0.0289406	SEMA5A, SEMA6A, SEMA6D, SEMA3F	332	34	16792	5.95039	1	0.883305	39.6001
GOTERM_BP_DIRECT	GO:0061053~somite development	3	0.00507451	0.0301504	PTCH1, FRZB, RBBP6	332	14	16792	10.8382	1	0.884605	40.879
GOTERM_BP_DIRECT	GO:0060065~uterus development	3	0.00507451	0.0301504	HOXA11, HOXA10, ESR1	332	14	16792	10.8382	1	0.884605	40.879
GOTERM_BP_DIRECT	GO:0006112~energy reserve metabolic process	3	0.00507451	0.0343433	LEPR, ADGRF5, GNAS	332	15	16792	10.1157	1	0.90745	45.117
GOTERM_BP_DIRECT	GO:0097009~energy homeostasis	3	0.00507451	0.0343433	LEPR, PIK3CA, ACACB	332	15	16792	10.1157	1	0.90745	45.117
GOTERM_BP_DIRECT	GO:0010628~positive regulation of gene expression	11	0.0186065	0.0354443	ARX, CDK1, ACTA2, GSN, NTRK2, MDM2, LEF1, PAWR, CALR, CDH3, HNRNPU	332	262	16792	2.12352	1	0.907058	46.1815
GOTERM_BP_DIRECT	GO:0048813~dendrite morphogenesis	4	0.00676601	0.0360018	MEF2A, KLF7, PICALM, DCLK1	332	37	16792	5.46793	1	0.903283	46.713
GOTERM_BP_DIRECT	GO:0051642~centrosome localization	3	0.00507451	0.0387477	SEMA6A, PLXNA2, BICD2	332	16	16792	9.48343	1	0.912754	49.2597
GOTERM_BP_DIRECT	GO:0032912~negative regulation of transforming growth factor beta2 production	2	0.00338301	0.0390361	GATA6, CDH3	332	2	16792	50.5783	1	0.907734	49.5204
GOTERM_BP_DIRECT	GO:0044029~hypomethylation of CpG island	2	0.00338301	0.0390361	MEG3, PIK3CA	332	2	16792	50.5783	1	0.907734	49.5204
GOTERM_BP_DIRECT	GO:0007155~cell adhesion	16	0.0270641	0.0393194	B4GALT1, COL4A3, MTSS1, TNXB, LPP, NUAK1, ADAM23, PPFIBP1, CDH3, CTNNA3, SEMA5A, CD47, LPXN, KIAA1462, CD24, THBS4	332	459	16792	1.76308	1	0.902715	49.7753
GOTERM_BP_DIRECT	GO:0007223~Wnt signaling pathway, calcium modulating pathway	4	0.00676601	0.0411555	TNRC6C, LEF1, TCF7L2, NFATC1	332	39	16792	5.18752	1	0.906658	51.398
GOTERM_BP_DIRECT	GO:0030326~embryonic limb morphogenesis	4	0.00676601	0.0438641	HOXA11, HOXA10, LEF1, PTCH1	332	40	16792	5.05783	1	0.914634	53.702
GOTERM_BP_DIRECT	GO:0001938~positive regulation of endothelial cell proliferation	5	0.00845752	0.0472106	SEMA5A, CAV2, BMPR2, PROX1, THBS4	332	69	16792	3.6651	1	0.924336	56.4067
GOTERM_BP_DIRECT	GO:0001709~cell fate determination	3	0.00507451	0.0481513	NOTCH4, PTCH1, PROX1	332	18	16792	8.42972	1	0.92307	57.1397
GOTERM_BP_DIRECT	GO:0045807~positive regulation of endocytosis	3	0.00507451	0.0481513	ARF1, SNCA, NEDD4L	332	18	16792	8.42972	1	0.92307	57.1397
GOTERM_BP_DIRECT	GO:0006986~response to unfolded protein	4	0.00676601	0.0495405	CREBRF, HSPB7, DNAJB4, THBS4	332	42	16792	4.81698	1	0.923698	58.2011
GOTERM_BP_DIRECT	GO:0046827~positive regulation of protein export from nucleus	3	0.00507451	0.0531317	MDM2, TCF7L2, GTSE1	332	19	16792	7.98605	1	0.932501	60.8312
GOTERM_BP_DIRECT	GO:0006974~cellular response to DNA damage stimulus	9	0.0152235	0.0545329	OTUB1, NUAK1, MACROD2, SMC5, KIAA0101, CHEK1, YAP1, NFATC2, RBBP6	332	208	16792	2.18848	1	0.932877	61.8145
GOTERM_BP_DIRECT	GO:2000348~regulation of CD40 signaling pathway	2	0.00338301	0.0579807	FANCD2, FANCA	332	3	16792	33.7189	1	0.939717	64.1359
GOTERM_BP_DIRECT	GO:0000255~allantoin metabolic process	2	0.00338301	0.0579807	STAT5B, GHR	332	3	16792	33.7189	1	0.939717	64.1359
GOTERM_BP_DIRECT	GO:0006549~isoleucine metabolic process	2	0.00338301	0.0579807	STAT5B, GHR	332	3	16792	33.7189	1	0.939717	64.1359
GOTERM_BP_DIRECT	GO:0060414~aorta smooth muscle tissue morphogenesis	2	0.00338301	0.0579807	PROX1, MYLK	332	3	16792	33.7189	1	0.939717	64.1359
GOTERM_BP_DIRECT	GO:0055005~ventricular cardiac myofibril assembly	2	0.00338301	0.0579807	MEF2A, PROX1	332	3	16792	33.7189	1	0.939717	64.1359
GOTERM_BP_DIRECT	GO:0006936~muscle contraction	6	0.010149	0.0605519	ACTA2, CALD1, ITGA1, MYH11, SCN7A, MYLK	332	107	16792	2.83617	1	0.94324	65.7799
GOTERM_BP_DIRECT	GO:0010595~positive regulation of endothelial cell migration	4	0.00676601	0.0619024	BMPR2, ANGPT1, PROX1, FOXP1	332	46	16792	4.39811	1	0.943204	66.6147
GOTERM_BP_DIRECT	GO:0006869~lipid transport	5	0.00845752	0.0630981	ABCA8, ABCA9, OSBPL8, ESYT2, ABCA6	332	76	16792	3.32752	1	0.942762	67.3378
GOTERM_BP_DIRECT	GO:0031016~pancreas development	3	0.00507451	0.0636043	HHEX, PROX1, TCF7L2	332	21	16792	7.22547	1	0.940486	67.6394
GOTERM_BP_DIRECT	GO:0030879~mammary gland development	3	0.00507451	0.0636043	B4GALT1, NOTCH4, LEF1	332	21	16792	7.22547	1	0.940486	67.6394
GOTERM_BP_DIRECT	GO:0031532~actin cytoskeleton reorganization	4	0.00676601	0.0651965	MKLN1, TNIK, CDC42BPA, PIP5K1A	332	47	16792	4.30454	1	0.941166	68.5712
GOTERM_BP_DIRECT	GO:0060045~positive regulation of cardiac muscle cell proliferation	3	0.00507451	0.0690795	CDK1, GATA6, TGFBR3	332	22	16792	6.89704	1	0.947412	70.7387
GOTERM_BP_DIRECT	GO:0042127~regulation of cell proliferation	8	0.013532	0.0740289	ARX, HHEX, CDCA7, NUAK1, BMPR2, CHEK1, FANCA, PURA	332	185	16792	2.18717	1	0.954952	73.2978
GOTERM_BP_DIRECT	GO:0060421~positive regulation of heart growth	2	0.00338301	0.0765529	ACACB, PROX1	332	4	16792	25.2892	1	0.95697	74.5202
GOTERM_BP_DIRECT	GO:0046449~creatinine metabolic process	2	0.00338301	0.0765529	STAT5B, GHR	332	4	16792	25.2892	1	0.95697	74.5202
GOTERM_BP_DIRECT	GO:0031999~negative regulation of fatty acid beta-oxidation	2	0.00338301	0.0765529	PLIN5, ACACB	332	4	16792	25.2892	1	0.95697	74.5202
GOTERM_BP_DIRECT	GO:0051725~protein de-ADP-ribosylation	2	0.00338301	0.0765529	MACROD2, ADPRH	332	4	16792	25.2892	1	0.95697	74.5202
GOTERM_BP_DIRECT	GO:0045589~regulation of regulatory T cell differentiation	2	0.00338301	0.0765529	FANCD2, FANCA	332	4	16792	25.2892	1	0.95697	74.5202
GOTERM_BP_DIRECT	GO:0006573~valine metabolic process	2	0.00338301	0.0765529	STAT5B, GHR	332	4	16792	25.2892	1	0.95697	74.5202
GOTERM_BP_DIRECT	GO:0001701~in utero embryonic development	8	0.013532	0.0774098	GNA13, SRSF1, HHEX, GATA6, ANGPT1, PTCH1, RBBP6, FOXP1	332	187	16792	2.16378	1	0.955848	74.9231
GOTERM_BP_DIRECT	GO:0042493~response to drug	11	0.0186065	0.0794309	CDK1, GATA6, SNCA, CENPF, MDM2, PTCH1, GNAS, ACACB, CALR, NFATC2, CDH3	332	304	16792	1.83014	1	0.956865	75.8498
GOTERM_BP_DIRECT	GO:0060070~canonical Wnt signaling pathway	5	0.00845752	0.0814412	LEF1, RYR2, CDH3, TCF7L2, WNT2B	332	83	16792	3.04689	1	0.95781	76.7394
GOTERM_BP_DIRECT	GO:0048709~oligodendrocyte differentiation	3	0.00507451	0.0863625	SRSF1, TSPAN2, NTRK2	332	25	16792	6.0694	1	0.963243	78.7887
GOTERM_BP_DIRECT	GO:0006260~DNA replication	7	0.0118405	0.0866252	CDK1, RRM2, GINS4, KIAA0101, CHEK1, MCM4, RBBP6	332	155	16792	2.28418	1	0.961368	78.8931
GOTERM_BP_DIRECT	GO:0051301~cell division	12	0.020298	0.0873428	SEPT4, CDK1, KIF2C, CDCA7, FIGN, CCNY, SMC5, SPG20, CENPF, BIRC5, WASL, PARD3B	332	350	16792	1.73411	1	0.960177	79.176
GOTERM_BP_DIRECT	GO:0006928~movement of cell or subcellular component	5	0.00845752	0.0900243	GNA13, MTSS1, CALD1, TXN, WASL	332	86	16792	2.9406	1	0.961944	80.2018
GOTERM_BP_DIRECT	GO:0006904~vesicle docking involved in exocytosis	3	0.00507451	0.0923839	STXBP1, EXOC6, SYTL2	332	26	16792	5.83596	1	0.963145	81.0649
GOTERM_BP_DIRECT	GO:0072661~protein targeting to plasma membrane	3	0.00507451	0.0923839	SPTBN1, PTCH1, PIP5K1A	332	26	16792	5.83596	1	0.963145	81.0649
GOTERM_BP_DIRECT	GO:0051491~positive regulation of filopodium assembly	3	0.00507451	0.0923839	DPYSL3, AGRN, WASL	332	26	16792	5.83596	1	0.963145	81.0649
GOTERM_BP_DIRECT	GO:0040014~regulation of multicellular organism growth	3	0.00507451	0.0923839	STAT5B, PIK3CA, GHR	332	26	16792	5.83596	1	0.963145	81.0649
GOTERM_BP_DIRECT	GO:0007275~multicellular organism development	16	0.0270641	0.0940499	TSHZ2, LEPR, DIAPH2, HOXA11, FRZB, PCOLCE, WNT2B, HOXC6, PHF3, PLEKHB1, HOXD8, HOXB8, NOTCH4, HOXA10, WIPF3, TWIST2	332	521	16792	1.55327	1	0.963349	81.6529
GOTERM_BP_DIRECT	GO:0043547~positive regulation of GTPase activity	17	0.0287556	0.0945803	CAV2, AGFG2, ARHGEF28, ASAP3, DOCK4, DIS3, ARHGAP6, SH2D3A, RASGRF2, RASGRP3, RGS5, GIT2, SRGAP3, SPTBN1, GNAS, ANGPT1, AGRN	332	565	16792	1.52183	1	0.962012	81.8364
GOTERM_BP_DIRECT	GO:2001199~negative regulation of dendritic cell differentiation	2	0.00338301	0.09476	TMEM176B, TMEM176A	332	5	16792	20.2313	1	0.960177	81.8982
GOTERM_BP_DIRECT	GO:0048311~mitochondrion distribution	2	0.00338301	0.09476	MTM1, MEF2A	332	5	16792	20.2313	1	0.960177	81.8982
GOTERM_BP_DIRECT	GO:0045843~negative regulation of striated muscle tissue development	2	0.00338301	0.09476	SOX15, LEF1	332	5	16792	20.2313	1	0.960177	81.8982
GOTERM_BP_DIRECT	GO:0019530~taurine metabolic process	2	0.00338301	0.09476	STAT5B, GHR	332	5	16792	20.2313	1	0.960177	81.8982
GOTERM_BP_DIRECT	GO:0060351~cartilage development involved in endochondral bone morphogenesis	2	0.00338301	0.09476	HOXA11, GHR	332	5	16792	20.2313	1	0.960177	81.8982
GOTERM_BP_DIRECT	GO:0060836~lymphatic endothelial cell differentiation	2	0.00338301	0.09476	BMPR2, PROX1	332	5	16792	20.2313	1	0.960177	81.8982
GOTERM_BP_DIRECT	GO:0016202~regulation of striated muscle tissue development	2	0.00338301	0.09476	CENPF, LEF1	332	5	16792	20.2313	1	0.960177	81.8982
GOTERM_BP_DIRECT	GO:0043949~regulation of cAMP-mediated signaling	2	0.00338301	0.09476	PDE4A, PDE10A	332	5	16792	20.2313	1	0.960177	81.8982
GOTERM_BP_DIRECT	GO:0010452~histone H3-K36 methylation	2	0.00338301	0.09476	WHSC1, SMYD2	332	5	16792	20.2313	1	0.960177	81.8982
GOTERM_BP_DIRECT	GO:0007411~axon guidance	7	0.0118405	0.0950221	ARX, SEMA6A, KLF7, GDF7, SEMA3F, MEG3, SPTBN1	332	159	16792	2.22672	1	0.958437	81.988
GOTERM_BP_DIRECT	GO:0021987~cerebral cortex development	4	0.00676601	0.0982353	NTRK2, GNG12, GART, FOXP2	332	56	16792	3.61274	1	0.960897	83.055
GOTERM_BP_DIRECT	GO:0042104~positive regulation of activated T cell proliferation	3	0.00507451	0.0985232	TNFSF4, STAT5B, CD24	332	27	16792	5.61981	1	0.959269	83.1476
