# Supplementary material for: Identification of key genes and pathways in endometriosis by integrated expression profiles analysis
Source: PeerJ. 2020 Dec 7;8:e10171. doi: 10.7717/peerj.10171 (PMC7727381; doi:10.7717/peerj.10171)
Supplement: Supplemental Information 12 [file peerj-08-10171-s012.xlsx]

## Sheet: Sheet1
Category	Term	Count	%	PValue	Genes	List Total	Pop Hits	Pop Total	Fold Enrichment	Bonferroni	Benjamini	FDR
KEGG_PATHWAY	hsa04022:cGMP-PKG signaling pathway	11	0.0186065	0.00273658	GNA13, MEF2A, PLN, PIK3CA, PRKG1, NFATC2, CACNA1D, AKT3, MYLK, ITPR1, NFATC1	148	166	6910	3.09386	0.442164	0.442164	3.4106
KEGG_PATHWAY	hsa05412:Arrhythmogenic right ventricular cardiomyopathy (ARVC)	7	0.0118405	0.00384608	ITGA1, CACNG4, LEF1, RYR2, CACNA1D, TCF7L2, CTNNA3	148	71	6910	4.60316	0.559918	0.336613	4.76259
KEGG_PATHWAY	hsa04921:Oxytocin signaling pathway	10	0.016915	0.00637101	KCNJ5, CACNG4, PIK3CA, RYR2, GNAS, NFATC2, CACNA1D, MYLK, ITPR1, NFATC1	148	158	6910	2.95501	0.74369	0.364783	7.77465
KEGG_PATHWAY	hsa04512:ECM-receptor interaction	7	0.0118405	0.0102868	COL4A4, COL4A3, CD47, TNXB, ITGA1, AGRN, THBS4	148	87	6910	3.7566	0.889467	0.423402	12.2728
KEGG_PATHWAY	hsa04261:Adrenergic signaling in cardiomyocytes	9	0.0152235	0.0123775	PLN, CACNG4, PIK3CA, RYR2, GNAS, SCN7A, CACNA1D, PPP2R2C, AKT3	148	146	6910	2.8781	0.92955	0.411731	14.5907
KEGG_PATHWAY	hsa04270:Vascular smooth muscle contraction	8	0.013532	0.0131956	GNA13, ACTA2, CALD1, GNAS, PRKG1, CACNA1D, MYLK, ITPR1	148	119	6910	3.13877	0.94095	0.375973	15.4824
KEGG_PATHWAY	hsa04390:Hippo signaling pathway	9	0.0152235	0.0149335	GDF7, BMPR2, LEF1, BIRC5, YAP1, PPP2R2C, TCF7L2, CTNNA3, WNT2B	148	151	6910	2.7828	0.959434	0.367346	17.348
KEGG_PATHWAY	hsa04713:Circadian entrainment	7	0.0118405	0.0154294	KCNJ5, RYR2, GNAS, GNG12, PRKG1, CACNA1D, ITPR1	148	95	6910	3.44026	0.96356	0.339006	17.8734
KEGG_PATHWAY	hsa05200:Pathways in cancer	16	0.0270641	0.0195595	COL4A4, GNA13, COL4A3, STAT5B, LEF1, BIRC5, GNG12, TCF7L2, CTNNA3, WNT2B, RASGRP3, MDM2, PIK3CA, GNAS, PTCH1, AKT3	148	393	6910	1.90083	0.985116	0.373431	22.1308
KEGG_PATHWAY	hsa05213:Endometrial cancer	5	0.00845752	0.0241746	PIK3CA, LEF1, TCF7L2, AKT3, CTNNA3	148	52	6910	4.48935	0.994552	0.40622	26.6471
KEGG_PATHWAY	hsa05205:Proteoglycans in cancer	10	0.016915	0.0264501	CAV2, GAB1, ESR1, PIK3CA, MDM2, PTCH1, AKT3, ITPR1, TWIST2, WNT2B	148	200	6910	2.33446	0.996686	0.404924	28.7838
KEGG_PATHWAY	hsa05221:Acute myeloid leukemia	5	0.00845752	0.0307448	STAT5B, PIK3CA, LEF1, TCF7L2, AKT3	148	56	6910	4.16868	0.998708	0.425518	32.6614
KEGG_PATHWAY	hsa04510:Focal adhesion	10	0.016915	0.031201	COL4A4, COL4A3, CAV2, TNXB, FLT1, ITGA1, PIK3CA, AKT3, MYLK, THBS4	148	206	6910	2.26647	0.998831	0.405099	33.0616
KEGG_PATHWAY	hsa04666:Fc gamma R-mediated phagocytosis	6	0.010149	0.0328475	GSN, PIK3CA, ASAP3, WASL, PIP5K1A, AKT3	148	84	6910	3.33494	0.999186	0.398388	34.488
KEGG_PATHWAY	hsa05414:Dilated cardiomyopathy	6	0.010149	0.0328475	PLN, ITGA1, CACNG4, RYR2, GNAS, CACNA1D	148	84	6910	3.33494	0.999186	0.398388	34.488
KEGG_PATHWAY	hsa04919:Thyroid hormone signaling pathway	7	0.0118405	0.0342157	PLN, NOTCH4, ESR1, PIK3CA, MDM2, RCAN2, AKT3	148	114	6910	2.86688	0.999398	0.390045	35.652
KEGG_PATHWAY	hsa05210:Colorectal cancer	5	0.00845752	0.0423971	PIK3CA, LEF1, BIRC5, TCF7L2, AKT3	148	62	6910	3.76526	0.999902	0.438266	42.2238
KEGG_PATHWAY	hsa04360:Axon guidance	7	0.0118405	0.0531894	SEMA5A, SEMA6A, SEMA6D, PLXNA2, SEMA3F, SRGAP3, NFATC2	148	127	6910	2.57342	0.999991	0.495814	49.9485
KEGG_PATHWAY	hsa04115:p53 signaling pathway	5	0.00845752	0.0537683	CDK1, RRM2, MDM2, CHEK1, GTSE1	148	67	6910	3.48427	0.999992	0.48004	50.3347
KEGG_PATHWAY	hsa04728:Dopaminergic synapse	7	0.0118405	0.0548691	KCNJ5, GNAS, GNG12, CACNA1D, PPP2R2C, AKT3, ITPR1	148	128	6910	2.55332	0.999994	0.468807	51.0614
KEGG_PATHWAY	hsa04611:Platelet activation	7	0.0118405	0.0583245	GNA13, PIK3CA, GNAS, PRKG1, AKT3, MYLK, ITPR1	148	130	6910	2.51403	0.999997	0.472711	53.2794
KEGG_PATHWAY	hsa04662:B cell receptor signaling pathway	5	0.00845752	0.058737	RASGRP3, PIK3CA, NFATC2, AKT3, NFATC1	148	69	6910	3.38327	0.999997	0.458804	53.5379
KEGG_PATHWAY	hsa04915:Estrogen signaling pathway	6	0.010149	0.0593414	KCNJ5, ESR1, PIK3CA, GNAS, AKT3, ITPR1	148	99	6910	2.82965	0.999998	0.446938	53.9143
KEGG_PATHWAY	hsa04024:cAMP signaling pathway	9	0.0152235	0.0599408	PDE4A, PLN, PIK3CA, RYR2, PTCH1, GNAS, CACNA1D, AKT3, NFATC1	148	198	6910	2.12224	0.999998	0.435851	54.2848
KEGG_PATHWAY	hsa04151:PI3K-Akt signaling pathway	13	0.0219895	0.0630659	COL4A4, COL4A3, TNXB, FLT1, ITGA1, PIK3CA, MDM2, ANGPT1, GNG12, PPP2R2C, AKT3, GHR, THBS4	148	345	6910	1.7593	0.999999	0.439058	56.1724
KEGG_PATHWAY	hsa00562:Inositol phosphate metabolism	5	0.00845752	0.063943	MTM1, PIK3C3, PLCH1, PIK3CA, PIP5K1A	148	71	6910	3.28797	0.999999	0.430498	56.6891
KEGG_PATHWAY	hsa04810:Regulation of actin cytoskeleton	9	0.0152235	0.0802657	GNA13, GSN, DIAPH2, ITGA1, PIK3CA, WASL, PIP5K1A, GNG12, MYLK	148	211	6910	1.99148	1	0.496139	65.3381
KEGG_PATHWAY	hsa05100:Bacterial invasion of epithelial cells	5	0.00845752	0.0839894	CAV2, GAB1, PIK3CA, WASL, CTNNA3	148	78	6910	2.9929	1	0.499462	67.0739
KEGG_PATHWAY	hsa04144:Endocytosis	10	0.016915	0.0983388	CAV2, FLT1, ARF1, GIT2, SPG20, MDM2, NEDD4L, ASAP3, WASL, PIP5K1A	148	258	6910	1.80966	1	0.545003	73.0407
