# Supplementary material for: Identification of key genes and pathways in endometriosis by integrated expression profiles analysis
Source: PeerJ. 2020 Dec 7;8:e10171. doi: 10.7717/peerj.10171 (PMC7727381; doi:10.7717/peerj.10171)
Supplement: Supplemental Information 13 [file peerj-08-10171-s013.xlsx]

## Sheet: Sheet1
indianred4		mediumpurple2
ARMCX4		MAPK1
CRYZL1		PRF1
TM2D3		ITGAL
LOC100287896		STAP1
ZFP82		FCER1G
TTBK2		CD96
IRAK1BP1		ZAP70
TNRC6B		ARHGDIB
ZNF493		COTL1
GLMP		PIK3R6
PPA2		ITGAD
TOMM20		LINC00996
PPP1CC		ARHGDIB
CIRBP		SRGN
MBNL1		SRGN
MBNL1		WIPF1
SH3BGRL		HCLS1
SH3BGRL		CD53
TIA1		PLEK
TIA1		SEMA4D
PPP1R12A		SLA
FXR1		SLA
EIF1B		CCL4
PPP2R5C		IL2RG
LANCL1		TYROBP
PLTP		APOBEC3G
VEZF1		FCER1G
CUL4B		PLCG2
N4BP2L2		EVI2A
BMI1		PTPN7
SENP6		SASH3
CHMP2B		RHOH
TLK1		ACAP1
RYK		LCP2
MSH6		LCP2
HLTF		IL2RB
AKAP11		GZMA
B4GAT1		GNLY
KRR1		CD38
ASF1A		ITGAM
TERF1		STAT4
TERF1		ARSB
CEP57		SPINK2
CEP57		XCL1
CEP57		CD96
CEP57		PTPRC
CPQ		KIR3DL2
FCHSD2		SH2D2A
CTSF		RAC2
PKD2		KLRC3
TUBGCP3		KLRD1
MANBA		FAM49A
SEMA3C		KIR2DL3
SMARCA1		KIR2DS5
SMARCA1		KIR2DL4
LYRM1		FGR
TCEA2		LCP1
WASF3		CORO1A
CLN5		GATA3
TMEM243		GATA3
POT1		CD247
NAP1L1		CST7
DZIP1		GPR18
TRIM23		KLRD1
PDS5B		FASLG
HLF		PSTPIP1
RCBTB2		KIR2DL4
IL11RA		KIR2DL4
GPRASP1		FASLG
TLE4		ITK
SSPN		KIR3DS1
SSPN		KIR2DS2
PFN2		HOPX
KIT		KIR3DL1
MPDZ		2018-09-06
RECK		PTPRC
ZNF175		PTPRC
TRPC1		HMHA1
PRKD1		DOCK2
SETBP1		RAC2
PSIP1		YME1L1
ING2		TRAF3IP3
SMARCA2		NKG7
SMARCA2		ZAP70
SETMAR		CD7
ZNF43		DOK2
ST13		CTSW
PFDN5		CD7
RFC1		PRF1
TDRD3		TRDV3
CPQ		KIR2DS4
TTC3		KIR3DL3
TTC3		TRDC
ST13		DOCK10
ST13		PVRIG
USP11		STAP1
UBE2I		C1QTNF3
LTA4H		COTL1
CAND1		LAT2
ATRX		HCST
ATRX		ARHGAP9
HNRNPH3		COTL1
PPIG		ARHGAP30
NCOA1		ARHGAP9
TSPAN6		IKZF1
MEF2C		TMC8
TUSC3		TBC1D10C
SLC23A2		UBASH3B
NAB1		CYSLTR1
FAM208A		EOMES
PSIP1		SLA2
EPHX2		ARHGAP9
ZNF32		HAVCR2
NDN		SAMD3
MAGI2		UBASH3B
CEP57		UBASH3B
PFDN5		TRG-AS1
PFKM		PIK3CG
TRO		PYHIN1
TRO		CD52
EIF4B		GNLY
LSM14A
KIDINS220
PNISR
PNISR
PNISR
TAB2
DESI2
MYH10
TCF4
TCF4
TCF4
KAT6B
NIPBL
2018-03-06
CEP68
DDHD2
ANKRD46
BBS4
ANKMY2
JAM3
DCUN1D4
DCP2
TSPYL4
FAM172A
ZDHHC17
TROVE2
TTC28
DZIP3
ZSCAN26
TENM4
EIF2AK2
MPDZ
SNX1
PGAP1
PPWD1
BMPR1A
RSBN1
RBMX
NAP1L1
TCF4
RYK
ALMS1
DKK3
GLG1
DPY19L2P2
TTC28
SMARCA1
BEX4
UBQLN2
LAMB2
NR3C1
ZNF227
OLFML1
ZNF573
SMARCA2
CCNB1IP1
NFYB
EIF2D
ZBED5
SAV1
BDH2
RHOT1
S100PBP
LOC728392
RBM26
REV1
FBXO3
LZTFL1
UFSP2
HEBP1
CAPRIN2
ZNF302
THYN1
ARMCX1
ICE2
MSL2
FCGRT
ZNHIT6
RNF219
LRRC49
CASD1
NHLRC2
SPATA7
CSDE1
LUC7L3
CSRNP3
ZBED8
TRMT1L
FIP1L1
NBEA
GLT8D2
TSPYL1
PARD3
LRRC37A2
C2orf68
IPW
ZNF45
ATF1
FBXO11
TCF4
RSL24D1
CRBN
RCOR3
RFX7
RNF20
ATL2
KMT2E
POLR3GL
AMZ2P1
ZAK
DPH5
TIGD7
BEX2
ZNF559
SPPL3
TMEM248
TNRC6A
C12orf57
MIB1
ATPAF1
YAP1
SCD5
EIF2S3
CCDC115
CFAP36
GOPC
ZNF512
FOPNL
ABI2
ABI2
SMAD5
SNHG8
SMAD5
MSI2
SAT2
RBMX
COMMD6
FAM217B
RBM27
ZNF496
MIR100HG
ZNF275
LRRC58
SAP30L
SNHG6
RWDD4
CREBZF
CACHD1
ZAK
ZAK
EPB41L4A-AS1
ANKRD50
ANKRD50
LRP6
PAPD4
LIX1L
EPC2
ZBTB44
AEBP2
PPIG
PEAK1
NAPEPLD
ZFP90
MSI2
TFDP2
WDR36
PPP4R3B
QSER1
BNIP2
MITD1
TMEM55A
CYP2U1
ADNP
ASH1L
CEP120
C3orf58
ZCCHC7
PHC3
FAM175A
LOC100506844
RBSN
PWAR6
PWAR6
CCDC50
MBOAT2
MRPS9
CNRIP1
EFCAB7
KIAA1143
RIF1
SSPN
C2orf49
IGIP
KMT2A
GLT8D2
PRIMPOL
ZBTB26
ITFG1
KLF12
BMPR1A
FIP1L1
ZBTB46
FAM171B
GLI3
SOS1
SETBP1
DDX26B
FZD3
LAMTOR3
HECTD2
USP30
LRCH2
ZNF227
CNBP
UTP23
MBD5
IGDCC4
TMEM185A
KPNA5
IL17RD
ZNF721
SUGT1
ZNF827
PHF14
DCAF16
C7orf60
ZNF25
RBM43
PARD3B
NADK2
ZNF84
TPR
CPED1
C14orf37
PCM1
AGO3
INTU
RAB30
JAM2
PARP11
SF3B1
ANKRD29
KPNA5
L3MBTL3
ERCC6L2
NAF1
RSF1
ZNF641
RBMX
OSGEPL1
FAM228B
EIF3F
FKBP7
PDCD7
TUBD1
ZNF33A
ZNF827
ZNF529
ZNF658
ZNF226
FAM175A
GKAP1
SAV1
CCDC50
LOC283357
LOC101927204
LRCH3
CSRNP3
DFNB59
RSF1
CKMT2-AS1
PCBP1-AS1
RHOJ
TXNL1
PRPF38A
ZFP90
DTX3
PRDM5
ATL2
CDH11
SP4
ZNF667
GATAD2B
KCTD6
RBMS3
UACA
ZNF420
ZNF148
FZD3
TNRC6B
LCORL
LOC100507557
SPATA6
ZNF727
FAM161A
ALG10B
ZNF462
HACD4
LOC100507311
C2orf68
